# Supplementary material for: Bidirectional Two-Sample Mendelian Randomization Analysis Identifies Causal Associations between Gut Microbiome and Sleep-Related Traits
Source: Preprints.org preprint supplement (doi:10.20944/preprints202402.1597.v1), 2024-02-28
Supplement: Supplementary file 1 [file supplementary]

## Sheet: Tables of contents
Contents	Description
Table S1	Instrumental variables used in MR analysis of 205 taxa and 205 pathways
Table S2	Instrumental variables used in MR analysis of 3 sleep-related traits
Table S3	Full result of MR estimates for the association of microbial taxa and pathways on sleep-related traits
Table S4	Full result of MR estimates for the association of sleep-related traits on microbial taxa and pathways
Table S5	79 suggestive causal relationships of microbial taxa and pathways on sleep-related traits
Table S6	45 suggestive causal relationships of sleep-related traits on microbial taxa and pathways

## Sheet: Table S1
Instrumental variables used in MR analysis of 205 taxa and 205 pathways
Exposure_ID	Exposure_Trait	SNP	Effect_Allele	Other_Allele	EAF	Pval	BETA	SE	N	R2	F
GCST90027446	ANAEROFRUCAT.PWY..homolactic.fermentation	rs9990334	A	G	0.424436	9.17124e-06	0.0741908	0.0167253	7738	0.00253642	19.6716
GCST90027446	ANAEROFRUCAT.PWY..homolactic.fermentation	rs17194003	G	A	0.201727	9.8892e-07	-0.102927	0.021032	7738	0.00308551	23.9434
GCST90027446	ANAEROFRUCAT.PWY..homolactic.fermentation	rs62335789	C	G	0.168684	8.00284e-06	-0.0977054	0.021882	7738	0.00256991	19.932
GCST90027446	ANAEROFRUCAT.PWY..homolactic.fermentation	rs11826488	A	G	0.0763678	8.76725e-06	0.153784	0.0345929	7738	0.00254749	19.7577
GCST90027446	ANAEROFRUCAT.PWY..homolactic.fermentation	rs9947104	G	A	0.303897	5.5977e-06	-0.0795727	0.017523	7738	0.00265783	20.6157
GCST90027447	ANAGLYCOLYSIS.PWY..glycolysis.III..from.glucose.	rs62271914	A	G	0.42331	5.52354e-06	-0.0740607	0.0162991	7738	0.00266111	20.6413
GCST90027447	ANAGLYCOLYSIS.PWY..glycolysis.III..from.glucose.	rs12647170	G	A	0.0765661	4.37282e-07	0.188783	0.0373683	7738	0.00328747	25.5158
GCST90027447	ANAGLYCOLYSIS.PWY..glycolysis.III..from.glucose.	rs2650470	G	A	0.45345	8.36093e-06	0.0739823	0.0166039	7738	0.00255915	19.8484
GCST90027447	ANAGLYCOLYSIS.PWY..glycolysis.III..from.glucose.	rs12704084	G	C	0.599698	9.24433e-06	-0.0736196	0.0166029	7738	0.00253447	19.6565
GCST90027447	ANAGLYCOLYSIS.PWY..glycolysis.III..from.glucose.	rs7041639	G	A	0.0875309	3.98111e-06	-0.157604	0.0341699	7738	0.00274174	21.2684
GCST90027447	ANAGLYCOLYSIS.PWY..glycolysis.III..from.glucose.	rs4878062	G	A	0.402286	3.60417e-06	0.0760825	0.0164219	7738	0.00276625	21.4591
GCST90027447	ANAGLYCOLYSIS.PWY..glycolysis.III..from.glucose.	rs58235446	T	C	0.0638651	3.61744e-06	-0.153253	0.033084	7738	0.00276534	21.452
GCST90027447	ANAGLYCOLYSIS.PWY..glycolysis.III..from.glucose.	rs605262	A	G	0.676757	9.00755e-06	-0.0757354	0.0170586	7738	0.00254084	19.706
GCST90027447	ANAGLYCOLYSIS.PWY..glycolysis.III..from.glucose.	rs35731059	A	C	0.104757	8.35021e-07	0.129356	0.0262545	7738	0.00312735	24.269
GCST90027447	ANAGLYCOLYSIS.PWY..glycolysis.III..from.glucose.	rs72666075	C	T	0.0593823	7.12057e-06	-0.151693	0.0337842	7738	0.00259863	20.1554
GCST90027447	ANAGLYCOLYSIS.PWY..glycolysis.III..from.glucose.	rs8101993	C	T	0.180021	5.94964e-06	-0.100985	0.0223014	7738	0.00264282	20.499
GCST90027448	ARGDEG.PWY..superpathway.of.L.arginine..putrescine..and.4.aminobutanoate.degradation	rs62523849	C	T	0.0675415	6.28032e-06	0.406572	0.0900147	7738	0.00262951	20.3955
GCST90027449	ARGORNPROST.PWY..arginine..ornithine.and.proline.interconversion	rs7576386	A	G	0.7686	4.44233e-06	-0.138428	0.0301616	7738	0.00271474	21.0584
GCST90027449	ARGORNPROST.PWY..arginine..ornithine.and.proline.interconversion	rs9344056	A	G	0.162359	1.13098e-06	-0.17033	0.0349944	7738	0.00305232	23.6851
GCST90027449	ARGORNPROST.PWY..arginine..ornithine.and.proline.interconversion	rs2942201	A	C	0.438055	3.1107e-06	0.120592	0.0258595	7738	0.00280254	21.7414
GCST90027449	ARGORNPROST.PWY..arginine..ornithine.and.proline.interconversion	rs4878453	G	A	0.0733257	1.70442e-06	0.242077	0.050584	7738	0.00295099	22.8964
GCST90027449	ARGORNPROST.PWY..arginine..ornithine.and.proline.interconversion	rs2504016	G	A	0.0734254	4.29655e-06	-0.23666	0.0514871	7738	0.00272296	21.1223
GCST90027449	ARGORNPROST.PWY..arginine..ornithine.and.proline.interconversion	rs7923287	T	A	0.723875	1.51072e-06	0.139505	0.0290043	7738	0.00298079	23.1283
GCST90027449	ARGORNPROST.PWY..arginine..ornithine.and.proline.interconversion	rs61074222	C	G	0.0941941	2.61436e-06	-0.210428	0.0447813	7738	0.00284541	22.0749
GCST90027450	ARO.PWY..chorismate.biosynthesis.I	rs10873850	G	A	0.2783	3.66979e-06	0.0858857	0.0185528	7738	0.0027618	21.4245
GCST90027450	ARO.PWY..chorismate.biosynthesis.I	rs6782393	C	A	0.0605063	7.1246e-06	-0.151342	0.033707	7738	0.00259849	20.1543
GCST90027450	ARO.PWY..chorismate.biosynthesis.I	rs3797252	C	T	0.307103	5.10699e-06	-0.0794419	0.0174202	7738	0.00268041	20.7914
GCST90027450	ARO.PWY..chorismate.biosynthesis.I	rs12656915	G	T	0.0791242	8.33214e-06	0.13461	0.0302054	7738	0.00256	19.855
GCST90027450	ARO.PWY..chorismate.biosynthesis.I	rs38127	C	T	0.645907	6.25927e-06	0.0760269	0.0168296	7738	0.00263034	20.402
GCST90027450	ARO.PWY..chorismate.biosynthesis.I	rs12707570	C	A	0.512255	7.18223e-06	-0.0728993	0.0162424	7738	0.00259651	20.1389
GCST90027450	ARO.PWY..chorismate.biosynthesis.I	rs1093520	G	T	0.915857	4.48524e-06	0.153028	0.0333575	7738	0.00271237	21.04
GCST90027450	ARO.PWY..chorismate.biosynthesis.I	rs61915762	A	G	0.275511	4.24771e-06	0.0827921	0.0180027	7738	0.00272577	21.1442
GCST90027450	ARO.PWY..chorismate.biosynthesis.I	rs73200771	A	G	0.0520806	5.28245e-06	-0.163263	0.0358564	7738	0.00267209	20.7267
GCST90027450	ARO.PWY..chorismate.biosynthesis.I	rs12021157	A	G	0.108849	7.68536e-06	0.12107	0.0270621	7738	0.00257986	20.0094
GCST90027450	ARO.PWY..chorismate.biosynthesis.I	rs8052034	A	G	0.559625	5.71144e-06	0.0740262	0.0163168	7738	0.00265287	20.5772
GCST90027450	ARO.PWY..chorismate.biosynthesis.I	rs7263922	T	C	0.232747	5.64895e-06	0.0864963	0.0190557	7738	0.00265558	20.5983
GCST90027450	ARO.PWY..chorismate.biosynthesis.I	rs9305847	C	A	0.626513	6.33824e-06	0.0762532	0.0168897	7738	0.00262725	20.378
GCST90027450	ARO.PWY..chorismate.biosynthesis.I	rs136110	C	T	0.208243	1.90964e-06	0.0964705	0.0202552	7738	0.00292292	22.678
GCST90027451	ASPASN.PWY..superpathway.of.L.aspartate.and.L.asparagine.biosynthesis	rs12490065	A	G	0.22917	4.29386e-06	0.0959472	0.0208734	7738	0.00272311	21.1235
GCST90027451	ASPASN.PWY..superpathway.of.L.aspartate.and.L.asparagine.biosynthesis	rs6858020	A	T	0.565376	6.87608e-06	-0.0727501	0.0161757	7738	0.00260722	20.2222
GCST90027451	ASPASN.PWY..superpathway.of.L.aspartate.and.L.asparagine.biosynthesis	rs113902391	A	G	0.217886	2.13803e-06	0.0922389	0.01946	7738	0.00289504	22.461
GCST90027451	ASPASN.PWY..superpathway.of.L.aspartate.and.L.asparagine.biosynthesis	rs7707269	C	T	0.366956	6.94403e-06	-0.0744962	0.0165717	7738	0.0026048	20.2034
GCST90027451	ASPASN.PWY..superpathway.of.L.aspartate.and.L.asparagine.biosynthesis	rs10267604	C	G	0.653998	6.71604e-06	-0.0764351	0.0169762	7738	0.00261301	20.2672
GCST90027451	ASPASN.PWY..superpathway.of.L.aspartate.and.L.asparagine.biosynthesis	rs820496	A	C	0.545733	2.43198e-08	-0.0946927	0.0169759	7738	0.00400495	31.1069
GCST90027451	ASPASN.PWY..superpathway.of.L.aspartate.and.L.asparagine.biosynthesis	rs77906768	G	A	0.0861075	5.42024e-06	0.133484	0.0293512	7738	0.00266575	20.6774
GCST90027451	ASPASN.PWY..superpathway.of.L.aspartate.and.L.asparagine.biosynthesis	rs9545502	T	C	0.197933	5.83678e-07	0.102021	0.0204183	7738	0.00321596	24.959
GCST90027451	ASPASN.PWY..superpathway.of.L.aspartate.and.L.asparagine.biosynthesis	rs2846765	T	C	0.515201	3.6151e-06	0.0802031	0.0173136	7738	0.0027655	21.4533
GCST90027451	ASPASN.PWY..superpathway.of.L.aspartate.and.L.asparagine.biosynthesis	rs149811032	A	G	0.0677355	8.74269e-06	-0.142534	0.0320579	7738	0.00254818	19.7631
GCST90027452	AST.PWY..L.arginine.degradation.II..AST.pathway.	rs538952	A	C	0.0624269	6.28076e-06	0.274151	0.060697	7738	0.0026295	20.3954
GCST90027452	AST.PWY..L.arginine.degradation.II..AST.pathway.	rs7068964	G	A	0.453157	8.12628e-06	-0.130976	0.0293547	7738	0.00256615	19.9028
GCST90027452	AST.PWY..L.arginine.degradation.II..AST.pathway.	rs72830406	G	C	0.10827	8.38211e-07	-0.233287	0.0473559	7738	0.0031264	24.2617
GCST90027452	AST.PWY..L.arginine.degradation.II..AST.pathway.	rs72924202	T	C	0.206071	3.4209e-06	-0.167725	0.0361181	7738	0.00277911	21.5591
GCST90027452	AST.PWY..L.arginine.degradation.II..AST.pathway.	rs1325380	C	T	0.242391	4.12788e-06	0.162314	0.0352487	7738	0.00273282	21.199
GCST90027452	AST.PWY..L.arginine.degradation.II..AST.pathway.	rs7209568	G	A	0.187878	3.87083e-06	0.172899	0.0374387	7738	0.00274866	21.3223
GCST90027453	BRANCHED.CHAIN.AA.SYN.PWY..superpathway.of.branched.amino.acid.biosynthesis	rs1484839	A	G	0.159734	6.12761e-06	-0.108324	0.0239553	7738	0.00263557	20.4426
GCST90027453	BRANCHED.CHAIN.AA.SYN.PWY..superpathway.of.branched.amino.acid.biosynthesis	rs146068392	G	C	0.050432	5.33129e-06	-0.176286	0.0387331	7738	0.00266983	20.7091
GCST90027453	BRANCHED.CHAIN.AA.SYN.PWY..superpathway.of.branched.amino.acid.biosynthesis	rs2007634	A	G	0.571356	9.08341e-06	0.0725248	0.0163421	7738	0.00253878	19.69
GCST90027453	BRANCHED.CHAIN.AA.SYN.PWY..superpathway.of.branched.amino.acid.biosynthesis	rs62350672	T	C	0.173836	7.47748e-06	-0.113597	0.0253587	7738	0.0025866	20.0618
GCST90027453	BRANCHED.CHAIN.AA.SYN.PWY..superpathway.of.branched.amino.acid.biosynthesis	rs10238229	T	C	0.794063	8.39059e-06	0.0962573	0.0216067	7738	0.00255828	19.8416
GCST90027453	BRANCHED.CHAIN.AA.SYN.PWY..superpathway.of.branched.amino.acid.biosynthesis	rs7023657	A	G	0.261857	9.78994e-06	-0.0812649	0.0183784	7738	0.00252038	19.5469
GCST90027453	BRANCHED.CHAIN.AA.SYN.PWY..superpathway.of.branched.amino.acid.biosynthesis	rs11025798	A	G	0.436503	6.82433e-06	0.0813802	0.0180881	7738	0.00260908	20.2366
GCST90027453	BRANCHED.CHAIN.AA.SYN.PWY..superpathway.of.branched.amino.acid.biosynthesis	rs552787	A	C	0.643558	2.71819e-07	-0.0880492	0.0171235	7738	0.0034053	26.4334
GCST90027453	BRANCHED.CHAIN.AA.SYN.PWY..superpathway.of.branched.amino.acid.biosynthesis	rs943781	T	C	0.449683	8.68944e-07	0.083589	0.0169924	7738	0.0031175	24.1924
GCST90027453	BRANCHED.CHAIN.AA.SYN.PWY..superpathway.of.branched.amino.acid.biosynthesis	rs28733370	G	C	0.192839	3.94135e-06	0.0950438	0.020597	7738	0.00274421	21.2877
GCST90027453	BRANCHED.CHAIN.AA.SYN.PWY..superpathway.of.branched.amino.acid.biosynthesis	rs981881	G	T	0.371793	9.82088e-06	-0.07446	0.016842	7738	0.0025196	19.5409
GCST90027453	BRANCHED.CHAIN.AA.SYN.PWY..superpathway.of.branched.amino.acid.biosynthesis	rs2107539	T	C	0.243451	7.06708e-06	-0.0987344	0.0219817	7738	0.00260048	20.1698
GCST90027453	BRANCHED.CHAIN.AA.SYN.PWY..superpathway.of.branched.amino.acid.biosynthesis	rs62228654	C	G	0.0668159	4.31449e-06	-0.156769	0.0341127	7738	0.00272193	21.1143
GCST90027454	COA.PWY..coenzyme.A.biosynthesis.I	rs12495388	G	A	0.097635	6.37248e-06	-0.121458	0.0269091	7738	0.00262593	20.3677
GCST90027454	COA.PWY..coenzyme.A.biosynthesis.I	rs117300263	A	G	0.0564102	5.94769e-06	-0.169358	0.0374003	7738	0.0026429	20.4997
GCST90027454	COA.PWY..coenzyme.A.biosynthesis.I	rs10831658	A	G	0.207259	1.97952e-06	-0.0951081	0.0199996	7738	0.00291405	22.609
GCST90027454	COA.PWY..coenzyme.A.biosynthesis.I	rs286908	A	G	0.293164	6.6728e-06	-0.0787738	0.0174903	7738	0.0026146	20.2796
GCST90027454	COA.PWY..coenzyme.A.biosynthesis.I	rs1941024	A	G	0.597554	9.69962e-06	-0.0737051	0.0166612	7738	0.00252266	19.5646
GCST90027454	COA.PWY..coenzyme.A.biosynthesis.I	rs2509667	A	C	0.120838	4.37121e-06	-0.116273	0.0253157	7738	0.00271871	21.0893
GCST90027454	COA.PWY..coenzyme.A.biosynthesis.I	rs9599845	C	T	0.237425	2.10838e-06	0.0961761	0.0202786	7738	0.00289848	22.4878
GCST90027454	COA.PWY..coenzyme.A.biosynthesis.I	rs9931054	C	T	0.0885579	1.45208e-06	-0.138123	0.0286697	7738	0.00299057	23.2044
GCST90027454	COA.PWY..coenzyme.A.biosynthesis.I	rs60987385	T	G	0.445396	1.01118e-06	0.0858549	0.0175592	7738	0.00308001	23.9005
GCST90027454	COA.PWY..coenzyme.A.biosynthesis.I	rs7251031	G	T	0.308219	4.00204e-06	-0.0801886	0.0173897	7738	0.00274045	21.2584
GCST90027455	COBALSYN.PWY..adenosylcobalamin.salvage.from.cobinamide.I	rs12128621	A	T	0.504393	1.13359e-06	-0.0796843	0.0163727	7738	0.00305175	23.6806
GCST90027455	COBALSYN.PWY..adenosylcobalamin.salvage.from.cobinamide.I	rs1514681	C	T	0.401121	4.11557e-06	-0.0787943	0.0171089	7738	0.00273356	21.2048
GCST90027455	COBALSYN.PWY..adenosylcobalamin.salvage.from.cobinamide.I	rs1451459	A	G	0.252245	7.43049e-06	0.0838938	0.0187222	7738	0.00258815	20.0739
GCST90027455	COBALSYN.PWY..adenosylcobalamin.salvage.from.cobinamide.I	rs13003991	G	C	0.606858	6.04283e-07	0.0821386	0.0164612	7738	0.00320738	24.8921
GCST90027455	COBALSYN.PWY..adenosylcobalamin.salvage.from.cobinamide.I	rs10006164	A	G	0.344145	9.71664e-07	-0.0869582	0.0177564	7738	0.00308986	23.9773
GCST90027455	COBALSYN.PWY..adenosylcobalamin.salvage.from.cobinamide.I	rs61798216	G	A	0.113593	7.03014e-06	-0.118636	0.026406	7738	0.00260177	20.1798
GCST90027455	COBALSYN.PWY..adenosylcobalamin.salvage.from.cobinamide.I	rs2654736	A	G	0.811446	4.01284e-06	0.0985757	0.0213797	7738	0.00273979	21.2532
GCST90027455	COBALSYN.PWY..adenosylcobalamin.salvage.from.cobinamide.I	rs2634527	C	T	0.498378	2.39303e-06	-0.0790784	0.0167644	7738	0.00286723	22.2447
GCST90027455	COBALSYN.PWY..adenosylcobalamin.salvage.from.cobinamide.I	rs74949229	A	G	0.0937893	1.45413e-06	-0.136496	0.0283337	7738	0.00299022	23.2017
GCST90027455	COBALSYN.PWY..adenosylcobalamin.salvage.from.cobinamide.I	rs12772838	T	C	0.0554534	4.55369e-06	0.168169	0.0366832	7738	0.00270864	21.011
GCST90027455	COBALSYN.PWY..adenosylcobalamin.salvage.from.cobinamide.I	rs11171846	T	C	0.0821696	1.54074e-06	-0.140647	0.0292656	7738	0.00297593	23.0905
GCST90027455	COBALSYN.PWY..adenosylcobalamin.salvage.from.cobinamide.I	rs437545	A	T	0.0771995	9.03408e-06	0.139229	0.0313643	7738	0.00254012	19.7004
GCST90027455	COBALSYN.PWY..adenosylcobalamin.salvage.from.cobinamide.I	rs75967282	C	G	0.0513485	2.31217e-06	-0.178428	0.0377704	7738	0.00287571	22.3107
GCST90027455	COBALSYN.PWY..adenosylcobalamin.salvage.from.cobinamide.I	rs1968451	C	T	0.680629	8.18149e-06	0.0887818	0.0199045	7738	0.00256448	19.8898
GCST90027456	COLANSYN.PWY..colanic.acid.building.blocks.biosynthesis	rs4551833	G	T	0.0539418	3.99275e-07	-0.184975	0.0364893	7738	0.00331	25.6912
GCST90027456	COLANSYN.PWY..colanic.acid.building.blocks.biosynthesis	rs1396212	T	C	0.186799	2.46557e-07	-0.120916	0.0234319	7738	0.00342948	26.6218
GCST90027457	COMPLETE.ARO.PWY..superpathway.of.aromatic.amino.acid.biosynthesis	rs7695572	G	A	0.820871	8.68497e-06	-0.0989027	0.0222375	7738	0.0025498	19.7757
GCST90027457	COMPLETE.ARO.PWY..superpathway.of.aromatic.amino.acid.biosynthesis	rs1093520	G	T	0.915857	8.25536e-08	0.179202	0.0334241	7738	0.00370106	28.7378
GCST90027457	COMPLETE.ARO.PWY..superpathway.of.aromatic.amino.acid.biosynthesis	rs7848585	G	A	0.101813	8.71412e-06	0.121487	0.0273197	7738	0.00254898	19.7693
GCST90027457	COMPLETE.ARO.PWY..superpathway.of.aromatic.amino.acid.biosynthesis	rs11215785	C	T	0.136228	1.74994e-06	0.116001	0.0242663	7738	0.00294448	22.8458
GCST90027457	COMPLETE.ARO.PWY..superpathway.of.aromatic.amino.acid.biosynthesis	rs61915762	A	G	0.275511	1.22131e-06	0.0875261	0.0180386	7738	0.00303333	23.5373
GCST90027457	COMPLETE.ARO.PWY..superpathway.of.aromatic.amino.acid.biosynthesis	rs73200771	A	G	0.0520806	5.14214e-06	-0.163792	0.035928	7738	0.00267872	20.7782
GCST90027457	COMPLETE.ARO.PWY..superpathway.of.aromatic.amino.acid.biosynthesis	rs1483968	T	C	0.0577669	9.7167e-06	0.150674	0.034063	7738	0.00252222	19.5613
GCST90027457	COMPLETE.ARO.PWY..superpathway.of.aromatic.amino.acid.biosynthesis	rs7263922	T	C	0.232747	3.61124e-06	0.0884537	0.0190938	7738	0.00276577	21.4553
GCST90027457	COMPLETE.ARO.PWY..superpathway.of.aromatic.amino.acid.biosynthesis	rs136110	C	T	0.208243	4.57977e-06	0.0930184	0.0202956	7738	0.00270724	21
GCST90027458	CRNFORCAT.PWY..creatinine.degradation.I	rs112209173	C	G	0.063751	4.43097e-06	0.226024	0.049242	7738	0.00271537	21.0633
GCST90027458	CRNFORCAT.PWY..creatinine.degradation.I	rs2189903	C	A	0.057391	8.01571e-06	0.212169	0.0475208	7738	0.00256951	19.929
GCST90027458	CRNFORCAT.PWY..creatinine.degradation.I	rs73694568	A	C	0.0998582	7.28887e-06	0.17137	0.038209	7738	0.00259288	20.1107
GCST90027458	CRNFORCAT.PWY..creatinine.degradation.I	rs16916507	A	G	0.317901	2.74142e-06	0.108315	0.0230983	7738	0.00283371	21.9838
GCST90027458	CRNFORCAT.PWY..creatinine.degradation.I	rs1621183	G	A	0.0696815	4.80102e-06	0.204076	0.0446233	7738	0.00269562	20.9097
GCST90027458	CRNFORCAT.PWY..creatinine.degradation.I	rs7134245	A	C	0.077241	5.1572e-06	0.186896	0.0410013	7738	0.002678	20.7726
GCST90027458	CRNFORCAT.PWY..creatinine.degradation.I	rs35899940	G	A	0.382337	3.55136e-06	0.101402	0.0218724	7738	0.00276989	21.4874
GCST90027458	CRNFORCAT.PWY..creatinine.degradation.I	rs7229834	T	C	0.470799	6.10477e-07	0.106916	0.0214352	7738	0.00320485	24.8724
GCST90027458	CRNFORCAT.PWY..creatinine.degradation.I	rs17193211	T	C	0.0746269	3.22421e-06	0.190762	0.0409712	7738	0.00279371	21.6727
GCST90027459	DAPLYSINESYN.PWY..L.lysine.biosynthesis.I	rs770027	T	C	0.459954	2.13678e-06	0.0773298	0.0163142	7738	0.00289518	22.4622
GCST90027459	DAPLYSINESYN.PWY..L.lysine.biosynthesis.I	rs7539819	G	T	0.494724	2.45344e-06	-0.0767416	0.0162865	7738	0.00286108	22.1968
GCST90027459	DAPLYSINESYN.PWY..L.lysine.biosynthesis.I	rs28635178	A	G	0.0565904	7.45317e-06	-0.157135	0.0350722	7738	0.0025874	20.0681
GCST90027459	DAPLYSINESYN.PWY..L.lysine.biosynthesis.I	rs919100	A	C	0.651308	6.4442e-06	-0.0761891	0.0168886	7738	0.00262318	20.3463
GCST90027459	DAPLYSINESYN.PWY..L.lysine.biosynthesis.I	rs2995916	G	T	0.501878	2.08469e-06	0.079086	0.0166671	7738	0.00290127	22.5096
GCST90027459	DAPLYSINESYN.PWY..L.lysine.biosynthesis.I	rs7777432	A	G	0.349483	7.10014e-06	0.0763596	0.0170041	7738	0.00259933	20.1609
GCST90027459	DAPLYSINESYN.PWY..L.lysine.biosynthesis.I	rs7033951	T	C	0.506403	5.95561e-06	0.0740912	0.016363	7738	0.00264257	20.4971
GCST90027459	DAPLYSINESYN.PWY..L.lysine.biosynthesis.I	rs73133343	G	T	0.0524294	1.05062e-06	0.178631	0.0365904	7738	0.00307055	23.8269
GCST90027459	DAPLYSINESYN.PWY..L.lysine.biosynthesis.I	rs7953577	C	G	0.326388	7.36159e-06	-0.0786353	0.0175409	7738	0.00259044	20.0917
GCST90027459	DAPLYSINESYN.PWY..L.lysine.biosynthesis.I	rs142998520	A	C	0.0523446	9.72356e-06	0.173555	0.0392371	7738	0.00252205	19.5599
GCST90027459	DAPLYSINESYN.PWY..L.lysine.biosynthesis.I	rs2180	A	G	0.261092	7.53848e-06	-0.0832534	0.0185921	7738	0.0025846	20.0463
GCST90027459	DAPLYSINESYN.PWY..L.lysine.biosynthesis.I	rs466481	A	T	0.52645	1.13673e-06	0.122845	0.0252436	7738	0.00305107	23.6753
GCST90027460	DENOVOPURINE2.PWY..superpathway.of.purine.nucleotides.de.novo.biosynthesis.II	rs1752223	G	C	0.168276	8.72467e-06	-0.0976795	0.0219673	7738	0.00254868	19.767
GCST90027460	DENOVOPURINE2.PWY..superpathway.of.purine.nucleotides.de.novo.biosynthesis.II	rs72770359	A	G	0.104329	8.66332e-06	0.119653	0.0268999	7738	0.00255042	19.7805
GCST90027460	DENOVOPURINE2.PWY..superpathway.of.purine.nucleotides.de.novo.biosynthesis.II	rs4683140	C	T	0.579406	3.02316e-06	-0.0783129	0.0167721	7738	0.00280958	21.7962
GCST90027460	DENOVOPURINE2.PWY..superpathway.of.purine.nucleotides.de.novo.biosynthesis.II	rs75789763	A	G	0.0562994	5.96422e-06	-0.166597	0.0367955	7738	0.00264222	20.4944
GCST90027460	DENOVOPURINE2.PWY..superpathway.of.purine.nucleotides.de.novo.biosynthesis.II	rs17496399	C	T	0.117622	1.9197e-06	0.121087	0.0254294	7738	0.00292162	22.6679
GCST90027460	DENOVOPURINE2.PWY..superpathway.of.purine.nucleotides.de.novo.biosynthesis.II	rs113403124	C	T	0.0764148	6.1166e-06	0.148864	0.0329176	7738	0.00263601	20.4461
GCST90027460	DENOVOPURINE2.PWY..superpathway.of.purine.nucleotides.de.novo.biosynthesis.II	rs1760263	C	T	0.854019	8.43942e-07	-0.114965	0.0233434	7738	0.00312472	24.2486
GCST90027460	DENOVOPURINE2.PWY..superpathway.of.purine.nucleotides.de.novo.biosynthesis.II	rs11608915	T	C	0.358167	6.0156e-06	-0.0756573	0.0167167	7738	0.00264011	20.4779
GCST90027460	DENOVOPURINE2.PWY..superpathway.of.purine.nucleotides.de.novo.biosynthesis.II	rs142048748	G	A	0.0511089	8.01258e-06	-0.172479	0.0386304	7738	0.00256961	19.9297
GCST90027460	DENOVOPURINE2.PWY..superpathway.of.purine.nucleotides.de.novo.biosynthesis.II	rs393435	C	T	0.687467	2.77312e-06	0.0853315	0.0182062	7738	0.00283087	21.9618
GCST90027461	DTDPRHAMSYN.PWY..dTDP.L.rhamnose.biosynthesis.I	rs10779615	G	C	0.508391	1.04834e-06	-0.0798475	0.0163543	7738	0.00307108	23.8311
GCST90027461	DTDPRHAMSYN.PWY..dTDP.L.rhamnose.biosynthesis.I	rs145140903	C	T	0.111675	9.86825e-06	-0.115636	0.0261618	7738	0.00251842	19.5317
GCST90027461	DTDPRHAMSYN.PWY..dTDP.L.rhamnose.biosynthesis.I	rs16856918	A	G	0.0552139	2.47031e-06	0.171977	0.0365088	7738	0.00285939	22.1837
GCST90027461	DTDPRHAMSYN.PWY..dTDP.L.rhamnose.biosynthesis.I	rs73171592	C	G	0.0771743	4.04065e-06	0.143446	0.0311211	7738	0.00273808	21.24
GCST90027461	DTDPRHAMSYN.PWY..dTDP.L.rhamnose.biosynthesis.I	rs11745906	C	T	0.281706	8.72627e-07	-0.0874056	0.0177712	7738	0.00311645	24.1842
GCST90027461	DTDPRHAMSYN.PWY..dTDP.L.rhamnose.biosynthesis.I	rs3819331	C	T	0.159253	4.75774e-06	0.104197	0.0227743	7738	0.00269785	20.927
GCST90027461	DTDPRHAMSYN.PWY..dTDP.L.rhamnose.biosynthesis.I	rs2620868	C	T	0.438608	2.86621e-06	-0.0759932	0.0162372	7738	0.00282273	21.8984
GCST90027461	DTDPRHAMSYN.PWY..dTDP.L.rhamnose.biosynthesis.I	rs80343422	G	A	0.0761024	3.44028e-07	-0.156491	0.030699	7738	0.0033469	25.9786
GCST90027461	DTDPRHAMSYN.PWY..dTDP.L.rhamnose.biosynthesis.I	rs72987936	A	T	0.364515	9.63436e-06	-0.0755081	0.0170631	7738	0.00252431	19.5775
GCST90027462	ECASYN.PWY..enterobacterial.common.antigen.biosynthesis	rs12638646	A	G	0.287611	3.82084e-06	-0.180901	0.0391484	7738	0.00275186	21.3472
GCST90027462	ECASYN.PWY..enterobacterial.common.antigen.biosynthesis	rs2010151	C	A	0.420012	8.42772e-06	-0.154264	0.0346348	7738	0.00255719	19.8332
GCST90027462	ECASYN.PWY..enterobacterial.common.antigen.biosynthesis	rs111457769	C	T	0.112372	3.96837e-06	0.260543	0.0564797	7738	0.00274253	21.2746
GCST90027462	ECASYN.PWY..enterobacterial.common.antigen.biosynthesis	rs10808847	A	C	0.744131	9.24587e-06	0.176398	0.0397821	7738	0.00253443	19.6561
GCST90027462	ECASYN.PWY..enterobacterial.common.antigen.biosynthesis	rs72727948	A	C	0.0684841	9.93597e-06	-0.306134	0.0692836	7738	0.00251674	19.5186
GCST90027462	ECASYN.PWY..enterobacterial.common.antigen.biosynthesis	rs2592994	T	C	0.437869	9.60895e-06	0.154966	0.0350142	7738	0.00252496	19.5826
GCST90027462	ECASYN.PWY..enterobacterial.common.antigen.biosynthesis	rs12781290	A	G	0.334687	5.47186e-06	0.17085	0.0375839	7738	0.00266342	20.6593
GCST90027462	ECASYN.PWY..enterobacterial.common.antigen.biosynthesis	rs10894222	A	G	0.530454	8.79836e-06	-0.147598	0.0332071	7738	0.00254662	19.7509
GCST90027462	ECASYN.PWY..enterobacterial.common.antigen.biosynthesis	rs10220585	T	C	0.581202	2.21015e-06	0.164702	0.0347972	7738	0.00288685	22.3973
GCST90027462	ECASYN.PWY..enterobacterial.common.antigen.biosynthesis	rs62043566	C	T	0.408328	8.07808e-06	0.155445	0.0348289	7738	0.00256761	19.9141
GCST90027462	ECASYN.PWY..enterobacterial.common.antigen.biosynthesis	rs1094970	G	A	0.621253	2.35797e-06	0.164022	0.0347501	7738	0.00287087	22.273
GCST90027462	ECASYN.PWY..enterobacterial.common.antigen.biosynthesis	rs4383249	G	T	0.182145	7.71502e-06	0.195242	0.0436496	7738	0.00257891	20.0021
GCST90027463	ENTBACSYN.PWY..enterobactin.biosynthesis	rs61817056	T	C	0.285203	7.42598e-06	-0.146109	0.0326057	7738	0.0025883	20.0751
GCST90027463	ENTBACSYN.PWY..enterobactin.biosynthesis	rs706111	A	T	0.122654	4.11066e-07	0.231567	0.0457302	7738	0.00330279	25.635
GCST90027464	FAO.PWY..fatty.acid..beta..oxidation.I	rs11209445	G	A	0.621444	6.35309e-06	0.0915904	0.020289	7738	0.00262668	20.3735
GCST90027464	FAO.PWY..fatty.acid..beta..oxidation.I	rs77917213	T	C	0.0890628	5.31339e-07	0.179322	0.0357597	7738	0.00323922	25.1401
GCST90027464	FAO.PWY..fatty.acid..beta..oxidation.I	rs13087509	T	C	0.928931	5.65639e-06	-0.186384	0.0410643	7738	0.00265526	20.5958
GCST90027464	FAO.PWY..fatty.acid..beta..oxidation.I	rs62305209	G	A	0.0836224	6.60774e-06	-0.16418	0.0364364	7738	0.00261701	20.2983
GCST90027464	FAO.PWY..fatty.acid..beta..oxidation.I	rs12111746	A	G	0.153754	7.45328e-06	-0.123757	0.0276225	7738	0.0025874	20.068
GCST90027464	FAO.PWY..fatty.acid..beta..oxidation.I	rs11761901	A	G	0.217568	3.56961e-06	-0.111105	0.0239709	7738	0.00276863	21.4775
GCST90027464	FAO.PWY..fatty.acid..beta..oxidation.I	rs7850683	A	G	0.240353	5.65527e-06	0.105932	0.0233388	7738	0.00265531	20.5961
GCST90027464	FAO.PWY..fatty.acid..beta..oxidation.I	rs4883632	T	C	0.51449	8.9784e-06	-0.0916478	0.0206394	7738	0.00254164	19.7122
GCST90027465	FERMENTATION.PWY..mixed.acid.fermentation	rs776910	G	A	0.825487	8.64531e-06	0.112024	0.0251821	7738	0.00255093	19.7845
GCST90027465	FERMENTATION.PWY..mixed.acid.fermentation	rs72770371	G	C	0.0938459	6.47156e-06	-0.147139	0.0326224	7738	0.00262213	20.3382
GCST90027465	FERMENTATION.PWY..mixed.acid.fermentation	rs2060298	G	C	0.464683	9.54465e-06	0.0872775	0.0197138	7738	0.00252661	19.5954
GCST90027465	FERMENTATION.PWY..mixed.acid.fermentation	rs7659451	G	A	0.824174	8.40586e-06	0.113654	0.0255139	7738	0.00255783	19.8381
GCST90027465	FERMENTATION.PWY..mixed.acid.fermentation	rs59426326	C	A	0.878208	6.34943e-08	0.157456	0.0291118	7738	0.00376629	29.2462
GCST90027465	FERMENTATION.PWY..mixed.acid.fermentation	rs11253111	C	T	0.445402	4.16491e-06	-0.088334	0.0191906	7738	0.00273062	21.1819
GCST90027465	FERMENTATION.PWY..mixed.acid.fermentation	rs61861701	G	A	0.245597	3.89375e-07	0.116389	0.0229379	7738	0.00331622	25.7396
GCST90027465	FERMENTATION.PWY..mixed.acid.fermentation	rs17175056	G	A	0.122588	8.45817e-06	0.127861	0.0287119	7738	0.00255631	19.8263
GCST90027465	FERMENTATION.PWY..mixed.acid.fermentation	rs6085392	A	G	0.260986	8.19733e-06	0.0978381	0.021937	7738	0.00256401	19.8861
GCST90027465	FERMENTATION.PWY..mixed.acid.fermentation	rs6123777	A	G	0.101285	7.76617e-06	0.153475	0.0343227	7738	0.00257729	19.9894
GCST90027465	FERMENTATION.PWY..mixed.acid.fermentation	rs743920	G	C	0.128486	2.38658e-06	-0.151934	0.0322058	7738	0.0028679	22.2499
GCST90027466	FUCCAT.PWY..fucose.degradation	rs116470157	T	C	0.0655714	5.38252e-06	-0.157257	0.0345673	7738	0.00266747	20.6908
GCST90027466	FUCCAT.PWY..fucose.degradation	rs12621639	A	C	0.505619	7.66474e-06	0.0768744	0.0171812	7738	0.00258052	20.0146
GCST90027466	FUCCAT.PWY..fucose.degradation	rs11731492	T	C	0.0717673	6.94577e-06	0.157379	0.0350092	7738	0.00260474	20.2029
GCST90027466	FUCCAT.PWY..fucose.degradation	rs76523770	T	G	0.0689696	9.50293e-06	0.152249	0.0343819	7738	0.00252769	19.6038
GCST90027466	FUCCAT.PWY..fucose.degradation	rs395474	A	G	0.921998	2.8945e-06	0.1524	0.0325768	7738	0.00282031	21.8796
GCST90027466	FUCCAT.PWY..fucose.degradation	rs342221	T	G	0.440168	8.09071e-06	-0.076973	0.0172478	7738	0.00256722	19.9112
GCST90027466	FUCCAT.PWY..fucose.degradation	rs17503513	T	G	0.207469	8.35099e-07	0.104512	0.0212123	7738	0.00312732	24.2689
GCST90027466	FUCCAT.PWY..fucose.degradation	rs1480889	T	C	0.458528	7.68672e-06	0.0758833	0.016962	7738	0.00257982	20.0091
GCST90027466	FUCCAT.PWY..fucose.degradation	rs1940965	C	A	0.084563	7.92785e-06	-0.138755	0.0310613	7738	0.00257222	19.95
GCST90027466	FUCCAT.PWY..fucose.degradation	rs13336538	G	A	0.244732	5.45786e-06	0.0912246	0.0200654	7738	0.00266405	20.6642
GCST90027467	FUC.RHAMCAT.PWY..superpathway.of.fucose.and.rhamnose.degradation	rs77474207	G	A	0.0998954	1.32701e-06	-0.198637	0.0410775	7738	0.00301282	23.3776
GCST90027467	FUC.RHAMCAT.PWY..superpathway.of.fucose.and.rhamnose.degradation	rs4711791	A	G	0.311064	8.02047e-07	-0.131441	0.0266352	7738	0.00313731	24.3466
GCST90027467	FUC.RHAMCAT.PWY..superpathway.of.fucose.and.rhamnose.degradation	rs17729512	G	A	0.0721954	9.04233e-06	0.204838	0.0461462	7738	0.0025399	19.6987
GCST90027467	FUC.RHAMCAT.PWY..superpathway.of.fucose.and.rhamnose.degradation	rs2514587	A	G	0.626008	6.88038e-06	0.114772	0.02552	7738	0.00260707	20.221
GCST90027467	FUC.RHAMCAT.PWY..superpathway.of.fucose.and.rhamnose.degradation	rs7937701	G	A	0.499312	7.48047e-07	-0.120752	0.024402	7738	0.00315456	24.4809
GCST90027467	FUC.RHAMCAT.PWY..superpathway.of.fucose.and.rhamnose.degradation	rs2420129	A	C	0.919003	9.42368e-06	-0.193205	0.043613	7738	0.00252975	19.6198
GCST90027467	FUC.RHAMCAT.PWY..superpathway.of.fucose.and.rhamnose.degradation	rs9542995	A	G	0.286838	1.36672e-06	-0.171703	0.0355509	7738	0.00300554	23.3209
GCST90027467	FUC.RHAMCAT.PWY..superpathway.of.fucose.and.rhamnose.degradation	rs7222065	T	C	0.0927288	1.43309e-06	-0.208307	0.0432142	7738	0.00299382	23.2297
GCST90027468	GALACTARDEG.PWY..D.galactarate.degradation.I	rs1366424	A	G	0.134736	9.98745e-06	0.185118	0.0419062	7738	0.00251547	19.5088
GCST90027468	GALACTARDEG.PWY..D.galactarate.degradation.I	rs9288803	C	T	0.404818	2.65371e-06	-0.138405	0.0294732	7738	0.00284173	22.0462
GCST90027468	GALACTARDEG.PWY..D.galactarate.degradation.I	rs6916769	G	T	0.298281	5.81401e-06	-0.142408	0.0314154	7738	0.00264849	20.5432
GCST90027468	GALACTARDEG.PWY..D.galactarate.degradation.I	rs146624623	G	A	0.10064	9.39928e-06	-0.223714	0.0504934	7738	0.00253038	19.6247
GCST90027468	GALACTARDEG.PWY..D.galactarate.degradation.I	rs11784069	G	T	0.374684	5.17938e-06	-0.132133	0.0289932	7738	0.00267694	20.7644
GCST90027468	GALACTARDEG.PWY..D.galactarate.degradation.I	rs7461966	G	C	0.117127	7.63195e-06	0.196781	0.0439708	7738	0.00258157	20.0227
GCST90027468	GALACTARDEG.PWY..D.galactarate.degradation.I	rs117047298	A	T	0.159337	9.9668e-07	0.196059	0.0400752	7738	0.00308358	23.9283
GCST90027469	GALACT.GLUCUROCAT.PWY..superpathway.of.hexuronide.and.hexuronate.degradation	rs1273560	G	A	0.233308	7.87459e-06	0.0928482	0.0207781	7738	0.00257388	19.9629
GCST90027469	GALACT.GLUCUROCAT.PWY..superpathway.of.hexuronide.and.hexuronate.degradation	rs2972891	G	A	0.516623	7.64187e-06	0.0723683	0.0161718	7738	0.00258125	20.0203
GCST90027469	GALACT.GLUCUROCAT.PWY..superpathway.of.hexuronide.and.hexuronate.degradation	rs4472353	C	T	0.822923	3.55389e-06	0.0987951	0.0213109	7738	0.00276971	21.486
GCST90027469	GALACT.GLUCUROCAT.PWY..superpathway.of.hexuronide.and.hexuronate.degradation	rs12859492	C	T	0.30745	2.95463e-06	0.0832796	0.0178178	7738	0.00281524	21.8402
GCST90027469	GALACT.GLUCUROCAT.PWY..superpathway.of.hexuronide.and.hexuronate.degradation	rs920917	C	A	0.134139	4.12785e-06	0.110506	0.0239977	7738	0.00273282	21.1991
GCST90027469	GALACT.GLUCUROCAT.PWY..superpathway.of.hexuronide.and.hexuronate.degradation	rs7182175	T	A	0.73131	4.74081e-06	-0.0838417	0.0183223	7738	0.00269873	20.9338
GCST90027469	GALACT.GLUCUROCAT.PWY..superpathway.of.hexuronide.and.hexuronate.degradation	rs8079753	A	G	0.24166	5.75558e-07	0.0964075	0.0192844	7738	0.00321943	24.986
GCST90027469	GALACT.GLUCUROCAT.PWY..superpathway.of.hexuronide.and.hexuronate.degradation	rs6065218	G	A	0.148047	2.63037e-06	0.122387	0.0260522	7738	0.00284391	22.0632
GCST90027469	GALACT.GLUCUROCAT.PWY..superpathway.of.hexuronide.and.hexuronate.degradation	rs79676117	C	A	0.0501703	4.54055e-06	-0.171166	0.0373321	7738	0.00270935	21.0165
GCST90027469	GALACT.GLUCUROCAT.PWY..superpathway.of.hexuronide.and.hexuronate.degradation	rs56210724	C	T	0.093528	7.30294e-06	0.131657	0.0293572	7738	0.00259241	20.107
GCST90027469	GALACT.GLUCUROCAT.PWY..superpathway.of.hexuronide.and.hexuronate.degradation	rs5756419	A	T	0.293243	2.33058e-06	0.0844728	0.0178876	7738	0.00287376	22.2955
GCST90027470	GALACTUROCAT.PWY..D.galacturonate.degradation.I	rs1827616	C	T	0.507147	5.16043e-06	0.07341	0.0161052	7738	0.00267785	20.7714
GCST90027470	GALACTUROCAT.PWY..D.galacturonate.degradation.I	rs4472353	C	T	0.822923	4.6718e-06	0.0973552	0.0212612	7738	0.00270234	20.9619
GCST90027470	GALACTUROCAT.PWY..D.galacturonate.degradation.I	rs12191883	C	T	0.476724	4.1748e-06	0.0832945	0.0180977	7738	0.00273004	21.1774
GCST90027470	GALACTUROCAT.PWY..D.galacturonate.degradation.I	rs2634527	C	T	0.498505	7.90701e-06	-0.0750373	0.0167956	7738	0.00257287	19.9551
GCST90027470	GALACTUROCAT.PWY..D.galacturonate.degradation.I	rs7872938	A	G	0.551324	7.16238e-06	-0.0725357	0.0161592	7738	0.00259719	20.1442
GCST90027470	GALACTUROCAT.PWY..D.galacturonate.degradation.I	rs12415307	G	A	0.289443	1.01056e-06	-0.0898982	0.0183857	7738	0.00308016	23.9017
GCST90027470	GALACTUROCAT.PWY..D.galacturonate.degradation.I	rs7182175	T	A	0.73131	2.88811e-06	-0.0855231	0.0182795	7738	0.00282085	21.8838
GCST90027470	GALACTUROCAT.PWY..D.galacturonate.degradation.I	rs8080416	C	T	0.255869	3.0641e-06	0.0876717	0.0187876	7738	0.00280627	21.7704
GCST90027470	GALACTUROCAT.PWY..D.galacturonate.degradation.I	rs1716276	T	A	0.791531	3.57302e-06	0.0929155	0.0200474	7738	0.00276839	21.4757
GCST90027471	GLCMANNANAUT.PWY..superpathway.of.N.acetylglucosamine..N.acetylmannosamine.and.N.acetylneuraminate.degradation	rs1770803	T	A	0.441319	2.00682e-06	-0.0778079	0.0163712	7738	0.00291067	22.5827
GCST90027471	GLCMANNANAUT.PWY..superpathway.of.N.acetylglucosamine..N.acetylmannosamine.and.N.acetylneuraminate.degradation	rs11211643	G	A	0.51565	3.40246e-07	0.0831748	0.0163098	7738	0.00334964	25.9999
GCST90027471	GLCMANNANAUT.PWY..superpathway.of.N.acetylglucosamine..N.acetylmannosamine.and.N.acetylneuraminate.degradation	rs13003991	G	C	0.606803	4.27087e-06	0.0758458	0.0164963	7738	0.00272443	21.1338
GCST90027471	GLCMANNANAUT.PWY..superpathway.of.N.acetylglucosamine..N.acetylmannosamine.and.N.acetylneuraminate.degradation	rs9445542	T	C	0.126577	2.00818e-06	-0.116241	0.0244585	7738	0.0029105	22.5814
GCST90027471	GLCMANNANAUT.PWY..superpathway.of.N.acetylglucosamine..N.acetylmannosamine.and.N.acetylneuraminate.degradation	rs13193692	T	G	0.230994	8.86446e-06	0.085911	0.0193355	7738	0.00254478	19.7366
GCST90027471	GLCMANNANAUT.PWY..superpathway.of.N.acetylglucosamine..N.acetylmannosamine.and.N.acetylneuraminate.degradation	rs2467707	C	T	0.890023	2.05304e-06	0.121636	0.0256176	7738	0.00290505	22.5389
GCST90027471	GLCMANNANAUT.PWY..superpathway.of.N.acetylglucosamine..N.acetylmannosamine.and.N.acetylneuraminate.degradation	rs2634527	C	T	0.498505	6.71813e-06	-0.0756236	0.0167962	7738	0.00261294	20.2666
GCST90027471	GLCMANNANAUT.PWY..superpathway.of.N.acetylglucosamine..N.acetylmannosamine.and.N.acetylneuraminate.degradation	rs74949229	A	G	0.0938701	3.23965e-07	-0.144988	0.0283792	7738	0.00336179	26.0946
GCST90027471	GLCMANNANAUT.PWY..superpathway.of.N.acetylglucosamine..N.acetylmannosamine.and.N.acetylneuraminate.degradation	rs75967282	C	G	0.0513866	1.4562e-06	-0.18223	0.0378294	7738	0.00298987	23.199
GCST90027471	GLCMANNANAUT.PWY..superpathway.of.N.acetylglucosamine..N.acetylmannosamine.and.N.acetylneuraminate.degradation	rs67763506	G	C	0.178172	4.89044e-06	0.0964672	0.0211114	7738	0.00269107	20.8743
GCST90027471	GLCMANNANAUT.PWY..superpathway.of.N.acetylglucosamine..N.acetylmannosamine.and.N.acetylneuraminate.degradation	rs5756419	A	T	0.293243	3.39787e-06	0.0829004	0.0178465	7738	0.00278078	21.5721
GCST90027472	GLUCARDEG.PWY..D.glucarate.degradation.I	rs4557268	T	A	0.763887	8.64303e-06	-0.153813	0.0345757	7738	0.00255099	19.785
GCST90027472	GLUCARDEG.PWY..D.glucarate.degradation.I	rs79950843	G	C	0.0652969	4.21532e-06	0.282755	0.0614621	7738	0.00272766	21.1589
GCST90027472	GLUCARDEG.PWY..D.glucarate.degradation.I	rs2236141	T	C	0.125015	2.57163e-06	0.19862	0.0422383	7738	0.00284948	22.1065
GCST90027473	GLUCONEO.PWY..gluconeogenesis.I	rs75506401	C	T	0.0687763	3.81601e-06	-0.150857	0.0326449	7738	0.00275218	21.3496
GCST90027473	GLUCONEO.PWY..gluconeogenesis.I	rs10866460	T	C	0.393209	5.03894e-07	-0.0846938	0.0168551	7738	0.00325236	25.2423
GCST90027473	GLUCONEO.PWY..gluconeogenesis.I	rs77004407	A	C	0.0531697	1.08633e-06	0.1793	0.036777	7738	0.00306228	23.7626
GCST90027473	GLUCONEO.PWY..gluconeogenesis.I	rs117665320	A	G	0.0631703	8.66026e-08	-0.19331	0.0361138	7738	0.00368917	28.6451
GCST90027474	GLUCOSE1PMETAB.PWY..glucose.and.glucose.1.phosphate.degradation	rs13403023	C	G	0.222549	2.06279e-06	-0.130473	0.0274844	7738	0.00290388	22.5298
GCST90027474	GLUCOSE1PMETAB.PWY..glucose.and.glucose.1.phosphate.degradation	rs2723521	C	T	0.630932	1.37194e-06	0.115642	0.0239472	7738	0.00300459	23.3136
GCST90027474	GLUCOSE1PMETAB.PWY..glucose.and.glucose.1.phosphate.degradation	rs2449502	T	G	0.14791	4.00766e-06	0.153883	0.0333731	7738	0.0027401	21.2557
GCST90027474	GLUCOSE1PMETAB.PWY..glucose.and.glucose.1.phosphate.degradation	rs72700025	A	G	0.106642	3.33583e-06	0.172204	0.0370412	7738	0.00278532	21.6074
GCST90027474	GLUCOSE1PMETAB.PWY..glucose.and.glucose.1.phosphate.degradation	rs4747915	A	T	0.330399	6.00218e-06	0.111955	0.0247343	7738	0.00264066	20.4822
GCST90027474	GLUCOSE1PMETAB.PWY..glucose.and.glucose.1.phosphate.degradation	rs1250593	A	G	0.691906	6.51703e-06	0.111221	0.0246672	7738	0.00262041	20.3248
GCST90027474	GLUCOSE1PMETAB.PWY..glucose.and.glucose.1.phosphate.degradation	rs17097518	G	A	0.0766726	8.91586e-06	0.193953	0.0436641	7738	0.00254336	19.7256
GCST90027474	GLUCOSE1PMETAB.PWY..glucose.and.glucose.1.phosphate.degradation	rs76562182	A	G	0.0693061	6.52293e-06	-0.203736	0.0451874	7738	0.00262019	20.323
GCST90027474	GLUCOSE1PMETAB.PWY..glucose.and.glucose.1.phosphate.degradation	rs1757700	T	C	0.878737	7.45342e-06	-0.179031	0.0399594	7738	0.00258739	20.068
GCST90027475	GLYCOCAT.PWY..glycogen.degradation.I..bacterial.	rs115001375	C	T	0.0755566	6.29156e-07	-0.175844	0.0352956	7738	0.00319739	24.8144
GCST90027475	GLYCOCAT.PWY..glycogen.degradation.I..bacterial.	rs10170790	T	C	0.552267	7.81543e-06	-0.0855325	0.019134	7738	0.00257573	19.9773
GCST90027475	GLYCOCAT.PWY..glycogen.degradation.I..bacterial.	rs2056101	T	C	0.535799	1.48952e-06	0.0909124	0.0188903	7738	0.00298428	23.1555
GCST90027475	GLYCOCAT.PWY..glycogen.degradation.I..bacterial.	rs35296932	G	A	0.242946	4.34681e-06	-0.102628	0.0223393	7738	0.00272009	21.1
GCST90027475	GLYCOCAT.PWY..glycogen.degradation.I..bacterial.	rs59657730	G	A	0.559955	3.50158e-08	0.110105	0.0199672	7738	0.00391426	30.3997
GCST90027475	GLYCOCAT.PWY..glycogen.degradation.I..bacterial.	rs41474647	T	C	0.136106	2.63584e-06	0.127405	0.0271228	7738	0.00284339	22.0592
GCST90027475	GLYCOCAT.PWY..glycogen.degradation.I..bacterial.	rs1576166	T	C	0.560505	7.5832e-06	0.0903842	0.0201903	7738	0.00258315	20.035
GCST90027475	GLYCOCAT.PWY..glycogen.degradation.I..bacterial.	rs35902953	C	T	0.176468	7.38925e-06	-0.110677	0.0246929	7738	0.00258952	20.0845
GCST90027475	GLYCOCAT.PWY..glycogen.degradation.I..bacterial.	rs978052	T	A	0.104279	6.91966e-06	0.14247	0.0316872	7738	0.00260567	20.2101
GCST90027475	GLYCOCAT.PWY..glycogen.degradation.I..bacterial.	rs35098678	G	T	0.170274	8.59622e-06	-0.116245	0.0261238	7738	0.00255233	19.7953
GCST90027475	GLYCOCAT.PWY..glycogen.degradation.I..bacterial.	rs738153	T	A	0.0581388	9.40765e-06	0.187256	0.0422665	7738	0.00253016	19.623
GCST90027476	GLYCOGENSYNTH.PWY..glycogen.biosynthesis.I..from.ADP.D.Glucose.	rs61295363	A	T	0.0652665	1.95175e-06	0.156802	0.0329529	7738	0.00291754	22.6361
GCST90027476	GLYCOGENSYNTH.PWY..glycogen.biosynthesis.I..from.ADP.D.Glucose.	rs10460443	A	G	0.789414	3.2707e-06	0.10428	0.0224112	7738	0.00279018	21.6452
GCST90027476	GLYCOGENSYNTH.PWY..glycogen.biosynthesis.I..from.ADP.D.Glucose.	rs115668747	G	T	0.0571408	6.41062e-06	-0.169625	0.037591	7738	0.00262446	20.3563
GCST90027476	GLYCOGENSYNTH.PWY..glycogen.biosynthesis.I..from.ADP.D.Glucose.	rs297276	T	G	0.364924	9.8271e-06	0.0740137	0.0167416	7738	0.00251945	19.5397
GCST90027476	GLYCOGENSYNTH.PWY..glycogen.biosynthesis.I..from.ADP.D.Glucose.	rs2064592	T	G	0.632553	8.44314e-06	-0.0742577	0.0166735	7738	0.00255674	19.8297
GCST90027476	GLYCOGENSYNTH.PWY..glycogen.biosynthesis.I..from.ADP.D.Glucose.	rs2452966	T	C	0.66551	5.91821e-06	0.078063	0.0172351	7738	0.00264412	20.5092
GCST90027476	GLYCOGENSYNTH.PWY..glycogen.biosynthesis.I..from.ADP.D.Glucose.	rs17746902	T	G	0.660202	3.07815e-07	-0.0880821	0.0172082	7738	0.00337447	26.1933
GCST90027476	GLYCOGENSYNTH.PWY..glycogen.biosynthesis.I..from.ADP.D.Glucose.	rs4759294	C	G	0.421776	3.86899e-06	-0.0764665	0.0165573	7738	0.00274878	21.3232
GCST90027476	GLYCOGENSYNTH.PWY..glycogen.biosynthesis.I..from.ADP.D.Glucose.	rs7206354	C	A	0.343727	6.56234e-06	0.0784659	0.0174082	7738	0.00261871	20.3115
GCST90027476	GLYCOGENSYNTH.PWY..glycogen.biosynthesis.I..from.ADP.D.Glucose.	rs4530151	C	T	0.558291	6.50918e-06	-0.0775274	0.0171934	7738	0.00262071	20.3271
GCST90027476	GLYCOGENSYNTH.PWY..glycogen.biosynthesis.I..from.ADP.D.Glucose.	rs10514997	T	C	0.0567666	8.60516e-06	-0.15594	0.0350463	7738	0.00255207	19.7934
GCST90027476	GLYCOGENSYNTH.PWY..glycogen.biosynthesis.I..from.ADP.D.Glucose.	rs2698174	A	G	0.945871	7.56055e-06	0.162424	0.0362775	7738	0.00258389	20.0407
GCST90027477	GLYCOL.GLYOXDEG.PWY..superpathway.of.glycol.metabolism.and.degradation	rs61802172	A	G	0.149788	5.67067e-06	0.18177	0.0400524	7738	0.00265464	20.5909
GCST90027477	GLYCOL.GLYOXDEG.PWY..superpathway.of.glycol.metabolism.and.degradation	rs10166293	A	G	0.451165	4.44109e-06	0.130987	0.02854	7738	0.00271481	21.0589
GCST90027477	GLYCOL.GLYOXDEG.PWY..superpathway.of.glycol.metabolism.and.degradation	rs72943027	G	T	0.134399	9.69348e-06	0.189798	0.0429028	7738	0.00252281	19.5658
GCST90027477	GLYCOL.GLYOXDEG.PWY..superpathway.of.glycol.metabolism.and.degradation	rs72822615	T	C	0.172729	7.94547e-07	0.183866	0.0372448	7738	0.00313964	24.3647
GCST90027477	GLYCOL.GLYOXDEG.PWY..superpathway.of.glycol.metabolism.and.degradation	rs2327909	C	T	0.308441	4.50935e-06	-0.140188	0.0305659	7738	0.00271105	21.0297
GCST90027477	GLYCOL.GLYOXDEG.PWY..superpathway.of.glycol.metabolism.and.degradation	rs7776094	A	C	0.0742795	6.30951e-06	-0.242195	0.0536335	7738	0.00262837	20.3867
GCST90027477	GLYCOL.GLYOXDEG.PWY..superpathway.of.glycol.metabolism.and.degradation	rs2514587	A	G	0.629148	7.89783e-06	0.133181	0.0298082	7738	0.00257316	19.9573
GCST90027477	GLYCOL.GLYOXDEG.PWY..superpathway.of.glycol.metabolism.and.degradation	rs3781339	T	C	0.187134	4.58109e-06	0.166232	0.0362705	7738	0.00270716	20.9995
GCST90027477	GLYCOL.GLYOXDEG.PWY..superpathway.of.glycol.metabolism.and.degradation	rs61861701	G	A	0.257808	2.04087e-06	0.159157	0.0335114	7738	0.00290652	22.5503
GCST90027477	GLYCOL.GLYOXDEG.PWY..superpathway.of.glycol.metabolism.and.degradation	rs73083939	A	C	0.0598326	5.77165e-06	0.275533	0.0607626	7738	0.00265029	20.5572
GCST90027477	GLYCOL.GLYOXDEG.PWY..superpathway.of.glycol.metabolism.and.degradation	rs4332610	A	G	0.514629	7.75096e-06	-0.124159	0.027764	7738	0.00257777	19.9932
GCST90027477	GLYCOL.GLYOXDEG.PWY..superpathway.of.glycol.metabolism.and.degradation	rs73024197	A	C	0.116768	2.31376e-06	-0.210026	0.0444604	7738	0.00287555	22.3094
GCST90027478	GOLPDLCAT.PWY..superpathway.of.glycerol.degradation.to.1.3.propanediol	rs4024642	C	A	0.720903	6.09537e-06	0.111836	0.0247258	7738	0.00263687	20.4527
GCST90027478	GOLPDLCAT.PWY..superpathway.of.glycerol.degradation.to.1.3.propanediol	rs16851440	C	T	0.562248	7.33552e-06	-0.0995905	0.0222116	7738	0.00259131	20.0985
GCST90027478	GOLPDLCAT.PWY..superpathway.of.glycerol.degradation.to.1.3.propanediol	rs34039849	A	G	0.0923128	9.28145e-06	0.169988	0.0383437	7738	0.00253348	19.6488
GCST90027478	GOLPDLCAT.PWY..superpathway.of.glycerol.degradation.to.1.3.propanediol	rs13214578	C	T	0.829373	3.2947e-06	0.136275	0.0292969	7738	0.00278838	21.6312
GCST90027478	GOLPDLCAT.PWY..superpathway.of.glycerol.degradation.to.1.3.propanediol	rs12698863	A	T	0.154424	7.13883e-06	-0.136533	0.0304116	7738	0.002598	20.1505
GCST90027478	GOLPDLCAT.PWY..superpathway.of.glycerol.degradation.to.1.3.propanediol	rs10814610	T	C	0.151425	7.58903e-07	-0.164834	0.033329	7738	0.00315099	24.4531
GCST90027478	GOLPDLCAT.PWY..superpathway.of.glycerol.degradation.to.1.3.propanediol	rs61861334	C	T	0.16831	3.24452e-06	-0.147413	0.0316697	7738	0.00279216	21.6606
GCST90027478	GOLPDLCAT.PWY..superpathway.of.glycerol.degradation.to.1.3.propanediol	rs7302060	C	T	0.387103	8.3052e-06	-0.0995836	0.0223424	7738	0.00256079	19.8612
GCST90027478	GOLPDLCAT.PWY..superpathway.of.glycerol.degradation.to.1.3.propanediol	rs9939420	G	A	0.0825379	7.42518e-06	-0.181884	0.0405889	7738	0.00258833	20.0753
GCST90027478	GOLPDLCAT.PWY..superpathway.of.glycerol.degradation.to.1.3.propanediol	rs4302037	T	C	0.537511	3.8101e-06	0.105	0.02272	7738	0.00275256	21.3526
GCST90027478	GOLPDLCAT.PWY..superpathway.of.glycerol.degradation.to.1.3.propanediol	rs72829113	T	C	0.345764	7.69532e-07	-0.116136	0.0234953	7738	0.00314755	24.4263
GCST90027478	GOLPDLCAT.PWY..superpathway.of.glycerol.degradation.to.1.3.propanediol	rs9957998	G	A	0.444744	3.63422e-06	0.102662	0.0221672	7738	0.0027642	21.4432
GCST90027478	GOLPDLCAT.PWY..superpathway.of.glycerol.degradation.to.1.3.propanediol	rs57224868	A	G	0.780381	8.62085e-06	0.120247	0.0270269	7738	0.00255163	19.7899
GCST90027478	GOLPDLCAT.PWY..superpathway.of.glycerol.degradation.to.1.3.propanediol	rs5998901	C	T	0.136341	8.30532e-07	0.160175	0.0325027	7738	0.00312868	24.2794
GCST90027479	HEMESYN2.PWY..heme.biosynthesis.II..anaerobic.	rs61775945	T	C	0.070895	3.14216e-06	0.153936	0.0330242	7738	0.00280006	21.7221
GCST90027479	HEMESYN2.PWY..heme.biosynthesis.II..anaerobic.	rs62104460	T	C	0.100914	2.623e-06	0.132019	0.0280991	7738	0.0028446	22.0686
GCST90027479	HEMESYN2.PWY..heme.biosynthesis.II..anaerobic.	rs9865200	G	C	0.805664	9.55157e-06	0.092737	0.0209477	7738	0.00252643	19.594
GCST90027479	HEMESYN2.PWY..heme.biosynthesis.II..anaerobic.	rs11916439	T	C	0.30394	7.87993e-06	0.0790409	0.0176888	7738	0.00257371	19.9616
GCST90027479	HEMESYN2.PWY..heme.biosynthesis.II..anaerobic.	rs1679174	C	T	0.802993	9.82479e-06	-0.0908743	0.0205552	7738	0.00251951	19.5401
GCST90027479	HEMESYN2.PWY..heme.biosynthesis.II..anaerobic.	rs10520466	C	T	0.077256	9.84786e-06	0.135971	0.0307593	7738	0.00251893	19.5357
GCST90027479	HEMESYN2.PWY..heme.biosynthesis.II..anaerobic.	rs169651	A	G	0.438577	3.2905e-06	-0.0767839	0.0165063	7738	0.00278869	21.6336
GCST90027479	HEMESYN2.PWY..heme.biosynthesis.II..anaerobic.	rs211508	G	C	0.228632	3.32437e-06	-0.0911261	0.0195983	7738	0.00278617	21.614
GCST90027479	HEMESYN2.PWY..heme.biosynthesis.II..anaerobic.	rs1596848	A	G	0.455036	1.88542e-06	-0.0782205	0.0164145	7738	0.00292607	22.7025
GCST90027479	HEMESYN2.PWY..heme.biosynthesis.II..anaerobic.	rs10765619	G	A	0.410443	2.92589e-06	0.0775765	0.0165905	7738	0.00281765	21.8589
GCST90027479	HEMESYN2.PWY..heme.biosynthesis.II..anaerobic.	rs10423929	T	C	0.241406	6.14337e-06	-0.0942771	0.0208513	7738	0.00263494	20.4377
GCST90027479	HEMESYN2.PWY..heme.biosynthesis.II..anaerobic.	rs4810354	A	G	0.727368	3.91464e-06	-0.08765	0.0189889	7738	0.00274589	21.3007
GCST90027479	HEMESYN2.PWY..heme.biosynthesis.II..anaerobic.	rs2096694	T	C	0.297591	3.1114e-06	0.0831726	0.0178355	7738	0.00280249	21.741
GCST90027479	HEMESYN2.PWY..heme.biosynthesis.II..anaerobic.	rs713716	A	G	0.251488	4.20595e-06	-0.0864109	0.0187812	7738	0.00272821	21.1631
GCST90027480	HEXITOLDEGSUPER.PWY..superpathway.of.hexitol.degradation..bacteria.	rs55920379	G	A	0.0677707	2.33874e-06	-0.165347	0.0350184	7738	0.00287289	22.2887
GCST90027480	HEXITOLDEGSUPER.PWY..superpathway.of.hexitol.degradation..bacteria.	rs4400672	C	T	0.321899	4.99503e-06	-0.0818249	0.0179244	7738	0.00268586	20.8338
GCST90027480	HEXITOLDEGSUPER.PWY..superpathway.of.hexitol.degradation..bacteria.	rs76367474	A	T	0.0605027	6.30681e-06	0.172732	0.0382502	7738	0.00262848	20.3875
GCST90027480	HEXITOLDEGSUPER.PWY..superpathway.of.hexitol.degradation..bacteria.	rs1479994	C	G	0.296866	5.45814e-06	0.0819165	0.018018	7738	0.00266404	20.6641
GCST90027480	HEXITOLDEGSUPER.PWY..superpathway.of.hexitol.degradation..bacteria.	rs73099859	G	A	0.0727707	1.70325e-06	-0.158737	0.0331685	7738	0.00295116	22.8978
GCST90027480	HEXITOLDEGSUPER.PWY..superpathway.of.hexitol.degradation..bacteria.	rs13129779	T	C	0.491405	8.66435e-06	0.0732744	0.0164733	7738	0.00255039	19.7803
GCST90027480	HEXITOLDEGSUPER.PWY..superpathway.of.hexitol.degradation..bacteria.	rs532436	A	G	0.177259	2.17443e-07	0.111866	0.02158	7738	0.00346065	26.8645
GCST90027480	HEXITOLDEGSUPER.PWY..superpathway.of.hexitol.degradation..bacteria.	rs79035992	A	G	0.0562931	4.22101e-06	0.162906	0.0354128	7738	0.00272733	21.1563
GCST90027480	HEXITOLDEGSUPER.PWY..superpathway.of.hexitol.degradation..bacteria.	rs9516950	A	G	0.057972	8.30195e-06	-0.15886	0.0356407	7738	0.00256089	19.8619
GCST90027480	HEXITOLDEGSUPER.PWY..superpathway.of.hexitol.degradation..bacteria.	rs2208125	G	A	0.375845	4.16245e-06	0.0774429	0.0168241	7738	0.00273077	21.1831
GCST90027481	HISDEG.PWY..L.histidine.degradation.I	rs12137024	A	G	0.169299	3.53134e-08	0.118929	0.0215732	7738	0.00391216	30.3833
GCST90027481	HISDEG.PWY..L.histidine.degradation.I	rs13010502	T	A	0.927338	9.3711e-06	-0.139759	0.0315398	7738	0.00253112	19.6304
GCST90027481	HISDEG.PWY..L.histidine.degradation.I	rs6783574	G	T	0.389025	2.74539e-06	0.0782697	0.0166922	7738	0.00283335	21.9811
GCST90027481	HISDEG.PWY..L.histidine.degradation.I	rs1501270	A	C	0.253443	1.39919e-06	0.0905245	0.0187611	7738	0.00299973	23.2758
GCST90027481	HISDEG.PWY..L.histidine.degradation.I	rs11948304	A	G	0.27158	3.47585e-06	0.0846347	0.0182383	7738	0.00277518	21.5286
GCST90027481	HISDEG.PWY..L.histidine.degradation.I	rs17613381	T	C	0.394205	2.06051e-06	-0.0877434	0.0184824	7738	0.00290415	22.532
GCST90027481	HISDEG.PWY..L.histidine.degradation.I	rs76864278	G	T	0.271007	6.19504e-06	-0.0838791	0.0185589	7738	0.00263288	20.4217
GCST90027481	HISDEG.PWY..L.histidine.degradation.I	rs2175835	C	T	0.0867975	4.33468e-06	-0.145776	0.0317273	7738	0.00272078	21.1054
GCST90027481	HISDEG.PWY..L.histidine.degradation.I	rs77982223	G	C	0.105957	5.86194e-06	0.120951	0.0266922	7738	0.00264647	20.5275
GCST90027481	HISDEG.PWY..L.histidine.degradation.I	rs11818856	C	G	0.549486	1.01802e-06	-0.0807259	0.0165147	7738	0.00307834	23.8876
GCST90027481	HISDEG.PWY..L.histidine.degradation.I	rs1339631	T	A	0.449921	8.50583e-06	-0.0737127	0.0165571	7738	0.00255493	19.8155
GCST90027481	HISDEG.PWY..L.histidine.degradation.I	rs144371117	A	G	0.0616052	9.58737e-06	-0.165831	0.0374651	7738	0.00252552	19.5869
GCST90027481	HISDEG.PWY..L.histidine.degradation.I	rs3095927	C	G	0.105458	8.77502e-07	0.158716	0.032277	7738	0.00311507	24.1735
GCST90027482	HISTSYN.PWY..L.histidine.biosynthesis	rs78778914	C	T	0.0527473	4.33878e-08	0.211625	0.0386425	7738	0.00386095	29.984
GCST90027482	HISTSYN.PWY..L.histidine.biosynthesis	rs10005886	G	T	0.0920829	4.49476e-06	0.13034	0.0284145	7738	0.00271185	21.0359
GCST90027482	HISTSYN.PWY..L.histidine.biosynthesis	rs12153246	C	T	0.766015	8.65542e-06	0.0875854	0.0196896	7738	0.00255064	19.7822
GCST90027482	HISTSYN.PWY..L.histidine.biosynthesis	rs6883971	A	G	0.500646	5.7996e-06	-0.0732918	0.0161665	7738	0.00264911	20.5479
GCST90027482	HISTSYN.PWY..L.histidine.biosynthesis	rs12098656	C	T	0.0596567	2.135e-06	-0.170832	0.036039	7738	0.00289539	22.4638
GCST90027482	HISTSYN.PWY..L.histidine.biosynthesis	rs10772275	C	T	0.454918	3.1919e-06	-0.0758565	0.016285	7738	0.00279619	21.692
GCST90027482	HISTSYN.PWY..L.histidine.biosynthesis	rs72690382	G	T	0.11954	5.988e-06	-0.11284	0.0249271	7738	0.00264124	20.4867
GCST90027482	HISTSYN.PWY..L.histidine.biosynthesis	rs7145596	T	C	0.0823276	2.52198e-06	-0.138166	0.0293574	7738	0.00285429	22.144
GCST90027482	HISTSYN.PWY..L.histidine.biosynthesis	rs10143187	T	C	0.231992	7.14857e-06	0.0939712	0.0209327	7738	0.00259766	20.1479
GCST90027482	HISTSYN.PWY..L.histidine.biosynthesis	rs11085939	T	C	0.316945	5.27512e-06	-0.0794314	0.0174439	7738	0.00267243	20.7293
GCST90027483	HOMOSER.METSYN.PWY..L.methionine.biosynthesis.I	rs17048278	G	A	0.34117	3.19399e-06	-0.0802747	0.017234	7738	0.00279603	21.6907
GCST90027483	HOMOSER.METSYN.PWY..L.methionine.biosynthesis.I	rs12713418	C	G	0.576142	9.68073e-06	0.0736122	0.0166386	7738	0.00252314	19.5683
GCST90027483	HOMOSER.METSYN.PWY..L.methionine.biosynthesis.I	rs1348931	T	G	0.368945	9.92741e-06	-0.0747997	0.0169278	7738	0.00251695	19.5203
GCST90027483	HOMOSER.METSYN.PWY..L.methionine.biosynthesis.I	rs4959131	T	C	0.144531	9.75387e-06	0.113823	0.0257369	7738	0.00252129	19.554
GCST90027483	HOMOSER.METSYN.PWY..L.methionine.biosynthesis.I	rs6913228	C	A	0.321372	5.25007e-06	0.0811434	0.0178159	7738	0.00267361	20.7385
GCST90027483	HOMOSER.METSYN.PWY..L.methionine.biosynthesis.I	rs112102053	A	G	0.131702	6.45989e-06	0.110645	0.0245293	7738	0.00262258	20.3416
GCST90027483	HOMOSER.METSYN.PWY..L.methionine.biosynthesis.I	rs10840754	A	T	0.080491	5.2918e-06	0.139919	0.0307321	7738	0.00267166	20.7233
GCST90027483	HOMOSER.METSYN.PWY..L.methionine.biosynthesis.I	rs61945524	T	C	0.299793	1.19091e-06	-0.0888739	0.0182976	7738	0.00303956	23.5858
GCST90027483	HOMOSER.METSYN.PWY..L.methionine.biosynthesis.I	rs61994705	G	C	0.39267	4.50924e-07	-0.0848608	0.0168171	7738	0.00327986	25.4565
GCST90027483	HOMOSER.METSYN.PWY..L.methionine.biosynthesis.I	rs4802635	G	A	0.5517	8.14852e-06	0.0729186	0.0163449	7738	0.00256547	19.8976
GCST90027484	HSERMETANA.PWY..L.methionine.biosynthesis.III	rs157871	G	A	0.113871	7.04097e-06	-0.112897	0.0251304	7738	0.00260139	20.1769
GCST90027484	HSERMETANA.PWY..L.methionine.biosynthesis.III	rs1073201	G	A	0.485935	4.55845e-06	-0.0756412	0.0165006	7738	0.00270838	21.009
GCST90027484	HSERMETANA.PWY..L.methionine.biosynthesis.III	rs36107535	T	C	0.244568	6.02858e-07	-0.0933045	0.0186972	7738	0.00320796	24.8966
GCST90027484	HSERMETANA.PWY..L.methionine.biosynthesis.III	rs10447306	G	C	0.0731812	8.91922e-06	0.13798	0.0310637	7738	0.00254326	19.7249
GCST90027484	HSERMETANA.PWY..L.methionine.biosynthesis.III	rs2007950	G	A	0.622835	7.87318e-06	0.0741464	0.0165927	7738	0.00257392	19.9633
GCST90027484	HSERMETANA.PWY..L.methionine.biosynthesis.III	rs113884393	G	C	0.0567687	2.31114e-06	0.168368	0.03564	7738	0.00287582	22.3115
GCST90027484	HSERMETANA.PWY..L.methionine.biosynthesis.III	rs117005086	G	C	0.0714832	9.34417e-07	-0.175176	0.0357139	7738	0.00309953	24.0525
GCST90027484	HSERMETANA.PWY..L.methionine.biosynthesis.III	rs10882802	G	A	0.885574	3.74891e-06	0.116194	0.025124	7738	0.00275655	21.3836
GCST90027484	HSERMETANA.PWY..L.methionine.biosynthesis.III	rs112704675	T	C	0.0839629	2.78748e-06	0.137352	0.0293118	7738	0.0028296	21.9519
GCST90027484	HSERMETANA.PWY..L.methionine.biosynthesis.III	rs537576	T	C	0.228849	9.84004e-06	-0.0870158	0.0196839	7738	0.00251913	19.5372
GCST90027484	HSERMETANA.PWY..L.methionine.biosynthesis.III	rs2304958	G	A	0.665235	2.88387e-06	-0.0800054	0.0170991	7738	0.00282121	21.8867
GCST90027484	HSERMETANA.PWY..L.methionine.biosynthesis.III	rs735254	G	A	0.679164	2.24509e-06	-0.0841755	0.0177961	7738	0.00288298	22.3672
GCST90027484	HSERMETANA.PWY..L.methionine.biosynthesis.III	rs12455185	T	C	0.694565	3.94241e-06	0.0810826	0.0175717	7738	0.00274415	21.2871
GCST90027484	HSERMETANA.PWY..L.methionine.biosynthesis.III	rs10402683	C	G	0.142733	5.51458e-06	0.119826	0.0263689	7738	0.00266151	20.6444
GCST90027484	HSERMETANA.PWY..L.methionine.biosynthesis.III	rs76383640	A	G	0.0801085	1.71281e-07	0.159693	0.0305452	7738	0.00351985	27.3257
GCST90027484	HSERMETANA.PWY..L.methionine.biosynthesis.III	rs2869014	A	G	0.103713	4.59115e-06	-0.120324	0.0262563	7738	0.00270662	20.9953
GCST90027484	HSERMETANA.PWY..L.methionine.biosynthesis.III	rs409480	G	C	0.715188	7.14091e-06	-0.0795352	0.017716	7738	0.00259793	20.1499
GCST90027485	ILEUSYN.PWY..L.isoleucine.biosynthesis.I..from.threonine.	rs622016	C	G	0.479785	8.38316e-06	0.0733249	0.0164584	7738	0.0025585	19.8433
GCST90027485	ILEUSYN.PWY..L.isoleucine.biosynthesis.I..from.threonine.	rs28542462	C	T	0.301778	5.31539e-06	0.0982763	0.02159	7738	0.00267056	20.7148
GCST90027485	ILEUSYN.PWY..L.isoleucine.biosynthesis.I..from.threonine.	rs330943	A	G	0.313932	8.7666e-07	0.0857583	0.0174395	7738	0.00311531	24.1753
GCST90027485	ILEUSYN.PWY..L.isoleucine.biosynthesis.I..from.threonine.	rs2704240	G	T	0.503827	6.65752e-06	-0.0726385	0.0161263	7738	0.00261516	20.284
GCST90027485	ILEUSYN.PWY..L.isoleucine.biosynthesis.I..from.threonine.	rs11007911	A	G	0.0796781	8.45559e-06	-0.137289	0.0308286	7738	0.00255638	19.8269
GCST90027485	ILEUSYN.PWY..L.isoleucine.biosynthesis.I..from.threonine.	rs681822	T	A	0.408038	1.91195e-06	0.0782854	0.0164378	7738	0.00292262	22.6757
GCST90027485	ILEUSYN.PWY..L.isoleucine.biosynthesis.I..from.threonine.	rs9324123	G	A	0.74863	6.45806e-06	0.083808	0.0185794	7738	0.00262265	20.3421
GCST90027485	ILEUSYN.PWY..L.isoleucine.biosynthesis.I..from.threonine.	rs163056	C	T	0.518416	7.37666e-06	0.0715464	0.0159612	7738	0.00258994	20.0878
GCST90027485	ILEUSYN.PWY..L.isoleucine.biosynthesis.I..from.threonine.	rs5752622	G	A	0.798232	6.87687e-06	-0.0906364	0.0201528	7738	0.00260719	20.222
GCST90027486	KDO.NAGLIPASYN.PWY..superpathway.of..Kdo.2.lipid.A.biosynthesis	rs736348	A	G	0.187631	5.24174e-06	-0.186202	0.0408798	7738	0.002674	20.7415
GCST90027486	KDO.NAGLIPASYN.PWY..superpathway.of..Kdo.2.lipid.A.biosynthesis	rs12056629	C	T	0.162447	4.51311e-07	0.220994	0.0437964	7738	0.00327965	25.4549
GCST90027486	KDO.NAGLIPASYN.PWY..superpathway.of..Kdo.2.lipid.A.biosynthesis	rs17153829	T	C	0.0718029	3.09194e-06	0.289462	0.0620549	7738	0.00280404	21.753
GCST90027486	KDO.NAGLIPASYN.PWY..superpathway.of..Kdo.2.lipid.A.biosynthesis	rs4924305	A	G	0.596831	8.89255e-06	0.194748	0.0438377	7738	0.002544	19.7306
GCST90027486	KDO.NAGLIPASYN.PWY..superpathway.of..Kdo.2.lipid.A.biosynthesis	rs11652627	C	G	0.532292	6.02452e-06	-0.146833	0.0324454	7738	0.00263974	20.4751
GCST90027486	KDO.NAGLIPASYN.PWY..superpathway.of..Kdo.2.lipid.A.biosynthesis	rs68108910	C	T	0.0856918	3.05468e-06	-0.265311	0.056847	7738	0.00280703	21.7763
GCST90027486	KDO.NAGLIPASYN.PWY..superpathway.of..Kdo.2.lipid.A.biosynthesis	rs2206783	G	A	0.80203	1.40605e-06	0.197497	0.0409392	7738	0.00299853	23.2664
GCST90027486	KDO.NAGLIPASYN.PWY..superpathway.of..Kdo.2.lipid.A.biosynthesis	rs737805	A	G	0.415438	2.52942e-06	0.157928	0.0335607	7738	0.00285356	22.1383
GCST90027487	KETOGLUCONMET.PWY..ketogluconate.metabolism	rs7552841	T	C	0.36844	2.56647e-06	-0.130382	0.0277244	7738	0.00284997	22.1104
GCST90027487	KETOGLUCONMET.PWY..ketogluconate.metabolism	rs145696452	C	T	0.172966	5.74119e-06	0.164815	0.0363372	7738	0.0026516	20.5673
GCST90027487	KETOGLUCONMET.PWY..ketogluconate.metabolism	rs28620806	C	T	0.653466	6.42333e-06	0.146268	0.0324179	7738	0.00262397	20.3525
GCST90027487	KETOGLUCONMET.PWY..ketogluconate.metabolism	rs2895499	A	G	0.0744206	3.7479e-06	-0.266455	0.0576131	7738	0.00275661	21.3841
GCST90027487	KETOGLUCONMET.PWY..ketogluconate.metabolism	rs2624489	G	A	0.0771916	2.97984e-06	-0.240451	0.0514641	7738	0.00281314	21.8239
GCST90027487	KETOGLUCONMET.PWY..ketogluconate.metabolism	rs2913384	A	G	0.922568	5.90871e-06	-0.23026	0.0508342	7738	0.00264452	20.5122
GCST90027487	KETOGLUCONMET.PWY..ketogluconate.metabolism	rs3923652	C	A	0.101974	2.28667e-06	-0.209856	0.0444018	7738	0.00287845	22.332
GCST90027487	KETOGLUCONMET.PWY..ketogluconate.metabolism	rs557948	T	C	0.117478	1.74433e-07	0.228551	0.0437442	7738	0.00351533	27.2905
GCST90027487	KETOGLUCONMET.PWY..ketogluconate.metabolism	rs4842206	G	A	0.17556	4.75268e-06	0.165422	0.0361546	7738	0.00269811	20.929
GCST90027487	KETOGLUCONMET.PWY..ketogluconate.metabolism	rs17814434	T	C	0.0561389	5.94226e-06	-0.287963	0.06359	7738	0.00264313	20.5014
GCST90027487	KETOGLUCONMET.PWY..ketogluconate.metabolism	rs4482264	C	T	0.354681	8.58365e-06	0.127232	0.028591	7738	0.00255269	19.7981
GCST90027488	LACTOSECAT.PWY..lactose.and.galactose.degradation.I	rs17034687	G	C	0.095861	3.21872e-07	0.142865	0.0279571	7738	0.0033634	26.1071
GCST90027488	LACTOSECAT.PWY..lactose.and.galactose.degradation.I	rs1833677	A	T	0.56405	4.22767e-06	0.0782579	0.0170131	7738	0.00272694	21.1533
GCST90027488	LACTOSECAT.PWY..lactose.and.galactose.degradation.I	rs55919213	T	C	0.151809	8.01824e-06	0.113638	0.0254525	7738	0.00256944	19.9284
GCST90027488	LACTOSECAT.PWY..lactose.and.galactose.degradation.I	rs4960590	G	A	0.0570902	1.60457e-06	0.17205	0.0358606	7738	0.0029659	23.0125
GCST90027488	LACTOSECAT.PWY..lactose.and.galactose.degradation.I	rs191667368	C	A	0.0547168	2.34924e-06	-0.196501	0.0416246	7738	0.00287179	22.2802
GCST90027488	LACTOSECAT.PWY..lactose.and.galactose.degradation.I	rs76039193	G	A	0.205257	8.49141e-06	0.0943389	0.0211883	7738	0.00255534	19.8188
GCST90027488	LACTOSECAT.PWY..lactose.and.galactose.degradation.I	rs507666	A	G	0.177602	5.38226e-15	0.16989	0.0217316	7738	0.00783621	61.0997
GCST90027488	LACTOSECAT.PWY..lactose.and.galactose.degradation.I	rs118184992	T	C	0.0658176	9.36728e-07	-0.164898	0.0336218	7738	0.00309892	24.0478
GCST90027488	LACTOSECAT.PWY..lactose.and.galactose.degradation.I	rs7147611	A	G	0.656995	3.91933e-06	-0.0814631	0.0176494	7738	0.00274559	21.2984
GCST90027488	LACTOSECAT.PWY..lactose.and.galactose.degradation.I	rs80205307	T	C	0.0984987	3.65304e-06	0.136232	0.0294225	7738	0.00276293	21.4333
GCST90027488	LACTOSECAT.PWY..lactose.and.galactose.degradation.I	rs6056182	T	C	0.310478	9.21068e-06	-0.0833209	0.0187875	7738	0.00253536	19.6634
GCST90027488	LACTOSECAT.PWY..lactose.and.galactose.degradation.I	rs9982657	A	G	0.051495	8.18113e-07	-0.185895	0.0376992	7738	0.00313241	24.3084
GCST90027489	METHGLYUT.PWY..superpathway.of.methylglyoxal.degradation	rs56061025	G	A	0.171142	8.75667e-06	0.202777	0.0456109	7738	0.00254778	19.76
GCST90027489	METHGLYUT.PWY..superpathway.of.methylglyoxal.degradation	rs78219112	C	A	0.140307	5.82688e-06	-0.236375	0.0521504	7738	0.00264795	20.5389
GCST90027489	METHGLYUT.PWY..superpathway.of.methylglyoxal.degradation	rs72727948	A	C	0.0622588	3.2722e-06	-0.340848	0.0732542	7738	0.00279007	21.6443
GCST90027489	METHGLYUT.PWY..superpathway.of.methylglyoxal.degradation	rs75084758	T	C	0.0810094	8.52145e-06	-0.31214	0.0701178	7738	0.00255448	19.812
GCST90027489	METHGLYUT.PWY..superpathway.of.methylglyoxal.degradation	rs174453	G	C	0.173317	9.33618e-07	0.219293	0.0447067	7738	0.00309974	24.0542
GCST90027489	METHGLYUT.PWY..superpathway.of.methylglyoxal.degradation	rs902061	C	T	0.522882	8.78036e-06	0.147904	0.0332725	7738	0.00254712	19.7548
GCST90027489	METHGLYUT.PWY..superpathway.of.methylglyoxal.degradation	rs7193741	G	T	0.575354	8.09766e-06	0.167159	0.0374578	7738	0.00256701	19.9095
GCST90027489	METHGLYUT.PWY..superpathway.of.methylglyoxal.degradation	rs12601384	A	G	0.141719	8.8367e-08	0.267527	0.0500129	7738	0.00368416	28.606
GCST90027490	NAGLIPASYN.PWY..lipid.IVA.biosynthesis	rs10918287	A	G	0.633281	7.02023e-06	-0.0781066	0.0173838	7738	0.00260212	20.1825
GCST90027490	NAGLIPASYN.PWY..lipid.IVA.biosynthesis	rs62104460	T	C	0.101043	7.8921e-06	0.126388	0.0282868	7738	0.00257333	19.9587
GCST90027490	NAGLIPASYN.PWY..lipid.IVA.biosynthesis	rs11916439	T	C	0.304223	2.02914e-06	0.0846475	0.0178187	7738	0.00290794	22.5614
GCST90027490	NAGLIPASYN.PWY..lipid.IVA.biosynthesis	rs1321819	A	G	0.282419	3.6336e-06	-0.0837878	0.0180916	7738	0.00276425	21.4435
GCST90027490	NAGLIPASYN.PWY..lipid.IVA.biosynthesis	rs12677665	G	A	0.688302	3.87287e-06	0.0820111	0.0177587	7738	0.00274853	21.3212
GCST90027490	NAGLIPASYN.PWY..lipid.IVA.biosynthesis	rs11790347	G	C	0.0511725	5.23033e-06	0.172086	0.0377768	7738	0.00267453	20.7457
GCST90027490	NAGLIPASYN.PWY..lipid.IVA.biosynthesis	rs2244670	A	T	0.208219	3.86369e-06	-0.0923156	0.0199879	7738	0.00274912	21.3258
GCST90027490	NAGLIPASYN.PWY..lipid.IVA.biosynthesis	rs657516	G	A	0.06019	7.61532e-06	-0.156583	0.034985	7738	0.00258211	20.0269
GCST90027490	NAGLIPASYN.PWY..lipid.IVA.biosynthesis	rs17118750	C	T	0.0945335	7.89571e-06	0.126177	0.0282402	7738	0.00257322	19.9578
GCST90027490	NAGLIPASYN.PWY..lipid.IVA.biosynthesis	rs67156511	G	T	0.12085	8.45927e-06	-0.117423	0.0263682	7738	0.00255628	19.826
GCST90027490	NAGLIPASYN.PWY..lipid.IVA.biosynthesis	rs2096694	T	C	0.296603	1.25231e-06	0.0874062	0.0180324	7738	0.00302714	23.4891
GCST90027491	NONMEVIPP.PWY..methylerythritol.phosphate.pathway.I	rs1428949	T	C	0.433176	6.80956e-06	-0.0743313	0.0165197	7738	0.00260961	20.2408
GCST90027491	NONMEVIPP.PWY..methylerythritol.phosphate.pathway.I	rs10213988	C	T	0.23195	8.78431e-06	0.0857065	0.019281	7738	0.00254701	19.754
GCST90027491	NONMEVIPP.PWY..methylerythritol.phosphate.pathway.I	rs741054	A	T	0.243661	3.64763e-06	0.0874913	0.0188945	7738	0.0027633	21.4361
GCST90027491	NONMEVIPP.PWY..methylerythritol.phosphate.pathway.I	rs10756052	C	G	0.240585	3.0703e-06	0.089341	0.019147	7738	0.00280577	21.7665
GCST90027491	NONMEVIPP.PWY..methylerythritol.phosphate.pathway.I	rs11139000	C	T	0.282074	6.13464e-06	-0.0818744	0.018107	7738	0.00263529	20.4404
GCST90027491	NONMEVIPP.PWY..methylerythritol.phosphate.pathway.I	rs7108080	A	G	0.508635	1.0258e-07	-0.0891578	0.0167524	7738	0.00364712	28.3174
GCST90027491	NONMEVIPP.PWY..methylerythritol.phosphate.pathway.I	rs76346802	G	A	0.0931431	4.81074e-06	-0.127657	0.0279162	7738	0.00269512	20.9058
GCST90027491	NONMEVIPP.PWY..methylerythritol.phosphate.pathway.I	rs11058744	T	G	0.0707436	1.04413e-06	-0.155967	0.0319398	7738	0.00307208	23.8388
GCST90027491	NONMEVIPP.PWY..methylerythritol.phosphate.pathway.I	rs79747739	C	A	0.0806663	1.33314e-07	0.162288	0.03077	7738	0.00358204	27.8103
GCST90027491	NONMEVIPP.PWY..methylerythritol.phosphate.pathway.I	rs11070764	C	T	0.553392	2.23814e-06	-0.077654	0.0164151	7738	0.00288374	22.3732
GCST90027491	NONMEVIPP.PWY..methylerythritol.phosphate.pathway.I	rs7221118	C	T	0.229708	2.53555e-06	-0.0899681	0.0191208	7738	0.00285296	22.1337
GCST90027492	NONOXIPENT.PWY..pentose.phosphate.pathway..non.oxidative.branch.	rs12735521	T	C	0.32237	6.08493e-06	0.0769256	0.0170061	7738	0.00263729	20.456
GCST90027492	NONOXIPENT.PWY..pentose.phosphate.pathway..non.oxidative.branch.	rs2306372	G	A	0.186595	2.14863e-06	0.111617	0.0235532	7738	0.00289382	22.4515
GCST90027492	NONOXIPENT.PWY..pentose.phosphate.pathway..non.oxidative.branch.	rs55804433	T	C	0.277617	4.44371e-06	-0.0850326	0.0185278	7738	0.00271466	21.0578
GCST90027492	NONOXIPENT.PWY..pentose.phosphate.pathway..non.oxidative.branch.	rs9461124	T	C	0.17584	4.36168e-06	-0.0970976	0.0211387	7738	0.00271925	21.0935
GCST90027492	NONOXIPENT.PWY..pentose.phosphate.pathway..non.oxidative.branch.	rs10817945	G	C	0.312346	1.82785e-06	-0.0831557	0.0174273	7738	0.00293373	22.7621
GCST90027492	NONOXIPENT.PWY..pentose.phosphate.pathway..non.oxidative.branch.	rs11107787	T	C	0.148261	1.13167e-06	0.110006	0.0226014	7738	0.00305217	23.6839
GCST90027492	NONOXIPENT.PWY..pentose.phosphate.pathway..non.oxidative.branch.	rs4786434	G	T	0.0547628	6.1778e-06	0.167808	0.0371239	7738	0.00263356	20.427
GCST90027493	ORNDEG.PWY..superpathway.of.ornithine.degradation	rs12041866	T	C	0.0747288	3.08524e-06	-0.376771	0.0807643	7738	0.00280457	21.7572
GCST90027493	ORNDEG.PWY..superpathway.of.ornithine.degradation	rs2010151	C	A	0.418744	7.80538e-06	-0.197206	0.0441133	7738	0.00257605	19.9798
GCST90027493	ORNDEG.PWY..superpathway.of.ornithine.degradation	rs12522600	A	T	0.249899	4.65008e-06	-0.225331	0.049199	7738	0.00270348	20.9708
GCST90027493	ORNDEG.PWY..superpathway.of.ornithine.degradation	rs6868622	T	C	0.28369	1.61703e-06	-0.237472	0.0495125	7738	0.00296399	22.9976
GCST90027493	ORNDEG.PWY..superpathway.of.ornithine.degradation	rs111457769	C	T	0.112527	2.96564e-06	0.337718	0.0722672	7738	0.00281432	21.833
GCST90027493	ORNDEG.PWY..superpathway.of.ornithine.degradation	rs6124449	C	A	0.092716	1.12496e-06	-0.379049	0.0778587	7738	0.00305365	23.6954
GCST90027494	P105.PWY..TCA.cycle.IV..2.oxoglutarate.decarboxylase.	rs857120	C	T	0.0883455	5.46849e-06	0.208416	0.0458464	7738	0.00266357	20.6604
GCST90027494	P105.PWY..TCA.cycle.IV..2.oxoglutarate.decarboxylase.	rs11582075	T	C	0.219197	5.99151e-06	-0.137144	0.0302967	7738	0.0026411	20.4856
GCST90027494	P105.PWY..TCA.cycle.IV..2.oxoglutarate.decarboxylase.	rs12034038	C	G	0.174619	9.30693e-06	0.145688	0.0328667	7738	0.00253281	19.6436
GCST90027494	P105.PWY..TCA.cycle.IV..2.oxoglutarate.decarboxylase.	rs27099	T	A	0.208739	9.72763e-06	-0.137509	0.0310886	7738	0.00252195	19.5591
GCST90027494	P105.PWY..TCA.cycle.IV..2.oxoglutarate.decarboxylase.	rs10223540	T	C	0.1009	9.36078e-06	-0.185493	0.0418583	7738	0.00253139	19.6325
GCST90027494	P105.PWY..TCA.cycle.IV..2.oxoglutarate.decarboxylase.	rs36182340	T	G	0.903211	2.00197e-08	0.235877	0.0420321	7738	0.00405337	31.4845
GCST90027494	P105.PWY..TCA.cycle.IV..2.oxoglutarate.decarboxylase.	rs72814612	C	A	0.107888	3.03555e-06	0.200658	0.0429821	7738	0.00280857	21.7883
GCST90027494	P105.PWY..TCA.cycle.IV..2.oxoglutarate.decarboxylase.	rs6562993	G	A	0.236848	6.41592e-06	-0.133596	0.0296076	7738	0.00262426	20.3547
GCST90027494	P105.PWY..TCA.cycle.IV..2.oxoglutarate.decarboxylase.	rs2518968	G	C	0.539119	5.54231e-07	0.134971	0.026959	7738	0.00322878	25.0588
GCST90027495	P108.PWY..pyruvate.fermentation.to.propanoate.I	rs6672992	C	A	0.189469	3.0134e-06	-0.104073	0.0222859	7738	0.00281038	21.8024
GCST90027495	P108.PWY..pyruvate.fermentation.to.propanoate.I	rs10490196	A	G	0.197408	6.47883e-06	0.0988657	0.0219208	7738	0.00262186	20.336
GCST90027495	P108.PWY..pyruvate.fermentation.to.propanoate.I	rs74768264	G	A	0.13271	8.05188e-07	0.128453	0.0260338	7738	0.00313635	24.3391
GCST90027495	P108.PWY..pyruvate.fermentation.to.propanoate.I	rs7690663	C	G	0.200105	8.46944e-06	0.0977238	0.0219458	7738	0.00255598	19.8237
GCST90027495	P108.PWY..pyruvate.fermentation.to.propanoate.I	rs2645383	C	T	0.334436	3.54031e-06	0.0871736	0.0188008	7738	0.00277066	21.4933
GCST90027495	P108.PWY..pyruvate.fermentation.to.propanoate.I	rs12514068	T	C	0.389548	9.37489e-06	-0.07789	0.017578	7738	0.00253102	19.6297
GCST90027495	P108.PWY..pyruvate.fermentation.to.propanoate.I	rs953621	A	C	0.198582	8.63703e-07	0.106359	0.021616	7738	0.00311899	24.204
GCST90027495	P108.PWY..pyruvate.fermentation.to.propanoate.I	rs62381166	C	T	0.0770703	3.79117e-06	-0.151374	0.0327471	7738	0.00275379	21.3621
GCST90027495	P108.PWY..pyruvate.fermentation.to.propanoate.I	rs200243	A	G	0.0873623	6.93881e-06	0.142409	0.0316777	7738	0.00260499	20.2048
GCST90027495	P108.PWY..pyruvate.fermentation.to.propanoate.I	rs3799603	C	T	0.360162	1.73213e-07	-0.0952307	0.0182225	7738	0.00351707	27.3041
GCST90027495	P108.PWY..pyruvate.fermentation.to.propanoate.I	rs10951264	A	G	0.637001	4.18866e-06	0.0833274	0.0181076	7738	0.00272922	21.171
GCST90027495	P108.PWY..pyruvate.fermentation.to.propanoate.I	rs11647368	C	A	0.0557287	5.44598e-06	0.179956	0.0395784	7738	0.00266459	20.6683
GCST90027495	P108.PWY..pyruvate.fermentation.to.propanoate.I	rs66470361	T	C	0.402943	3.63804e-06	0.0825122	0.0178171	7738	0.00276395	21.4411
GCST90027495	P108.PWY..pyruvate.fermentation.to.propanoate.I	rs2586438	T	C	0.57861	8.41458e-06	-0.0826985	0.0185658	7738	0.00255758	19.8361
GCST90027496	P122.PWY..heterolactic.fermentation	rs113865897	A	G	0.0616905	6.0551e-06	0.292743	0.0647025	7738	0.0026385	20.4654
GCST90027496	P122.PWY..heterolactic.fermentation	rs10478090	A	G	0.916364	5.47725e-06	0.241206	0.0530633	7738	0.00266318	20.6574
GCST90027496	P122.PWY..heterolactic.fermentation	rs798301	A	T	0.494294	2.32143e-06	-0.144703	0.0306366	7738	0.00287473	22.303
GCST90027496	P122.PWY..heterolactic.fermentation	rs72956918	A	G	0.0703907	6.37945e-07	0.325538	0.0653775	7738	0.00319396	24.7876
GCST90027496	P122.PWY..heterolactic.fermentation	rs36039198	A	G	0.0993116	1.97741e-07	-0.28699	0.0551751	7738	0.00348421	27.0481
GCST90027496	P122.PWY..heterolactic.fermentation	rs1963381	A	G	0.761012	9.85807e-07	0.167074	0.0341354	7738	0.00308629	23.9495
GCST90027497	P161.PWY..acetylene.degradation	rs10917476	G	C	0.313636	2.08878e-06	0.0828812	0.0174684	7738	0.00290079	22.5058
GCST90027497	P161.PWY..acetylene.degradation	rs17639960	C	T	0.156574	3.05622e-06	-0.107741	0.0230856	7738	0.0028069	21.7753
GCST90027497	P161.PWY..acetylene.degradation	rs12700304	T	G	0.249884	6.52885e-06	0.0843908	0.0187182	7738	0.00261997	20.3213
GCST90027497	P161.PWY..acetylene.degradation	rs7096251	T	C	0.60112	2.17453e-06	-0.0846704	0.0178762	7738	0.00289086	22.4285
GCST90027497	P161.PWY..acetylene.degradation	rs181541	G	A	0.620551	5.07198e-06	0.0785302	0.0172148	7738	0.0026821	20.8045
GCST90027498	P162.PWY..L.glutamate.degradation.V..via.hydroxyglutarate.	rs10933259	G	A	0.287238	2.60226e-06	0.0850658	0.0180993	7738	0.00284656	22.0838
GCST90027498	P162.PWY..L.glutamate.degradation.V..via.hydroxyglutarate.	rs7043302	T	G	0.0507327	8.84875e-06	0.174085	0.0391769	7738	0.00254521	19.74
GCST90027498	P162.PWY..L.glutamate.degradation.V..via.hydroxyglutarate.	rs4451355	T	A	0.637633	9.58203e-06	0.0754375	0.0170426	7738	0.00252565	19.5879
GCST90027498	P162.PWY..L.glutamate.degradation.V..via.hydroxyglutarate.	rs2282015	G	T	0.379771	8.21838e-06	-0.0755993	0.0169527	7738	0.00256338	19.8812
GCST90027498	P162.PWY..L.glutamate.degradation.V..via.hydroxyglutarate.	rs3908395	G	A	0.674308	3.22359e-06	0.0841692	0.0180774	7738	0.00279376	21.673
GCST90027498	P162.PWY..L.glutamate.degradation.V..via.hydroxyglutarate.	rs9570722	G	A	0.393238	4.16818e-06	-0.078216	0.0169931	7738	0.00273043	21.1804
GCST90027498	P162.PWY..L.glutamate.degradation.V..via.hydroxyglutarate.	rs79195604	A	G	0.0663535	6.132e-06	0.151377	0.0334773	7738	0.00263539	20.4413
GCST90027498	P162.PWY..L.glutamate.degradation.V..via.hydroxyglutarate.	rs1690328	C	T	0.733708	6.85417e-06	-0.0832316	0.0185034	7738	0.002608	20.2283
GCST90027498	P162.PWY..L.glutamate.degradation.V..via.hydroxyglutarate.	rs288633	A	G	0.863791	1.81762e-06	0.114452	0.0239805	7738	0.00293511	22.7729
GCST90027498	P162.PWY..L.glutamate.degradation.V..via.hydroxyglutarate.	rs77890687	G	A	0.131645	1.66091e-06	0.116686	0.0243562	7738	0.00295738	22.9461
GCST90027498	P162.PWY..L.glutamate.degradation.V..via.hydroxyglutarate.	rs6072106	C	T	0.12294	8.0908e-06	0.11865	0.0265865	7738	0.00256722	19.9111
GCST90027499	P164.PWY..purine.nucleobases.degradation.I..anaerobic.	rs56260931	C	T	0.414068	9.52926e-06	0.109628	0.0247602	7738	0.00252701	19.5985
GCST90027499	P164.PWY..purine.nucleobases.degradation.I..anaerobic.	rs9790814	A	T	0.591811	5.74788e-06	0.109994	0.0242521	7738	0.00265131	20.5651
GCST90027499	P164.PWY..purine.nucleobases.degradation.I..anaerobic.	rs72748182	T	G	0.122365	1.86899e-06	-0.181529	0.0380795	7738	0.00292823	22.7193
GCST90027499	P164.PWY..purine.nucleobases.degradation.I..anaerobic.	rs245920	C	T	0.608287	9.97095e-06	-0.108162	0.0244832	7738	0.00251588	19.5119
GCST90027499	P164.PWY..purine.nucleobases.degradation.I..anaerobic.	rs188448548	T	C	0.086182	6.89517e-06	0.195637	0.0435048	7738	0.00260654	20.2169
GCST90027499	P164.PWY..purine.nucleobases.degradation.I..anaerobic.	rs9736306	G	A	0.916673	4.68971e-06	-0.199598	0.0435973	7738	0.00270139	20.9546
GCST90027499	P164.PWY..purine.nucleobases.degradation.I..anaerobic.	rs640081	A	G	0.708977	8.95322e-06	-0.129658	0.0291956	7738	0.00254233	19.7176
GCST90027499	P164.PWY..purine.nucleobases.degradation.I..anaerobic.	rs72830334	A	G	0.0941639	2.95661e-06	0.193721	0.0414481	7738	0.00281507	21.8389
GCST90027499	P164.PWY..purine.nucleobases.degradation.I..anaerobic.	rs73967534	C	A	0.137219	2.13033e-06	-0.163089	0.0344023	7738	0.00289593	22.468
GCST90027499	P164.PWY..purine.nucleobases.degradation.I..anaerobic.	rs12983272	T	C	0.334327	7.62522e-06	-0.116097	0.025941	7738	0.00258179	20.0244
GCST90027499	P164.PWY..purine.nucleobases.degradation.I..anaerobic.	rs117143105	C	A	0.158405	8.49152e-06	0.161561	0.0362862	7738	0.00255534	19.8188
GCST90027499	P164.PWY..purine.nucleobases.degradation.I..anaerobic.	rs11703988	A	G	0.0615119	4.73067e-06	-0.232078	0.0507121	7738	0.00269925	20.9379
GCST90027500	P23.PWY..reductive.TCA.cycle.I	rs34718894	A	G	0.156658	3.30379e-06	0.22699	0.0488048	7738	0.0027877	21.6259
GCST90027500	P23.PWY..reductive.TCA.cycle.I	rs57006859	T	C	0.15939	1.91487e-06	0.236063	0.0495701	7738	0.00292225	22.6728
GCST90027500	P23.PWY..reductive.TCA.cycle.I	rs1153514	A	G	0.0742352	9.4244e-06	0.296834	0.0670059	7738	0.00252973	19.6196
GCST90027500	P23.PWY..reductive.TCA.cycle.I	rs9382699	C	T	0.257064	1.68432e-06	0.192184	0.0401386	7738	0.00295392	22.9192
GCST90027500	P23.PWY..reductive.TCA.cycle.I	rs3858055	A	C	0.48166	5.88041e-06	0.182849	0.0403583	7738	0.0026457	20.5214
GCST90027500	P23.PWY..reductive.TCA.cycle.I	rs34942635	C	T	0.117045	9.91352e-06	0.244274	0.0552774	7738	0.0025173	19.523
GCST90027500	P23.PWY..reductive.TCA.cycle.I	rs10894665	T	C	0.196907	6.38769e-06	-0.202854	0.0449476	7738	0.00262534	20.3631
GCST90027500	P23.PWY..reductive.TCA.cycle.I	rs9954617	T	C	0.262774	1.92315e-06	0.191837	0.0402905	7738	0.00292118	22.6645
GCST90027500	P23.PWY..reductive.TCA.cycle.I	rs74338794	T	C	0.190267	1.04872e-06	0.231905	0.0474995	7738	0.00307099	23.8304
GCST90027500	P23.PWY..reductive.TCA.cycle.I	rs9613514	T	G	0.375811	8.06604e-06	0.163306	0.0365877	7738	0.00256798	19.917
GCST90027501	P42.PWY..incomplete.reductive.TCA.cycle	rs116605191	A	G	0.0661051	7.83737e-06	0.146581	0.0327952	7738	0.00257504	19.972
GCST90027501	P42.PWY..incomplete.reductive.TCA.cycle	rs664864	T	C	0.63338	1.88432e-06	-0.0806164	0.0169168	7738	0.00292622	22.7037
GCST90027501	P42.PWY..incomplete.reductive.TCA.cycle	rs7622789	T	C	0.194319	6.1059e-06	-0.0914599	0.0202225	7738	0.00263644	20.4494
GCST90027501	P42.PWY..incomplete.reductive.TCA.cycle	rs73216471	C	G	0.168911	5.46064e-07	-0.10774	0.0215077	7738	0.00323246	25.0874
GCST90027501	P42.PWY..incomplete.reductive.TCA.cycle	rs12652368	C	T	0.435051	3.22438e-06	-0.0765527	0.0164418	7738	0.0027937	21.6726
GCST90027501	P42.PWY..incomplete.reductive.TCA.cycle	rs66662729	T	C	0.148528	4.74131e-06	0.107394	0.0234694	7738	0.0026987	20.9336
GCST90027501	P42.PWY..incomplete.reductive.TCA.cycle	rs1364745	T	C	0.160109	5.91045e-06	0.100517	0.0221912	7738	0.00264445	20.5117
GCST90027501	P42.PWY..incomplete.reductive.TCA.cycle	rs111926862	G	C	0.0636667	5.8219e-06	0.152922	0.0337372	7738	0.00264816	20.5406
GCST90027501	P42.PWY..incomplete.reductive.TCA.cycle	rs1371744	A	G	0.248703	7.09147e-06	-0.0858229	0.0191103	7738	0.00259963	20.1632
GCST90027501	P42.PWY..incomplete.reductive.TCA.cycle	rs10810562	C	T	0.857281	6.57275e-06	-0.103458	0.0229546	7738	0.00261832	20.3085
GCST90027501	P42.PWY..incomplete.reductive.TCA.cycle	rs55721043	G	A	0.237246	5.15597e-06	0.0872412	0.0191388	7738	0.00267806	20.7731
GCST90027501	P42.PWY..incomplete.reductive.TCA.cycle	rs11148356	T	C	0.0777056	2.07651e-06	-0.14327	0.0301886	7738	0.00290224	22.5171
GCST90027501	P42.PWY..incomplete.reductive.TCA.cycle	rs7160842	G	A	0.490014	2.78117e-06	0.0752614	0.0160597	7738	0.00283016	21.9562
GCST90027501	P42.PWY..incomplete.reductive.TCA.cycle	rs7177833	G	A	0.160088	7.25822e-06	0.0988101	0.0220265	7738	0.00259392	20.1187
GCST90027502	P441.PWY..superpathway.of.N.acetylneuraminate.degradation	rs11208476	G	A	0.0811191	7.83788e-06	-0.137228	0.0307027	7738	0.00257503	19.9719
GCST90027502	P441.PWY..superpathway.of.N.acetylneuraminate.degradation	rs9368736	C	T	0.0542344	1.79628e-06	-0.182013	0.0381171	7738	0.00293803	22.7956
GCST90027502	P441.PWY..superpathway.of.N.acetylneuraminate.degradation	rs6930880	T	C	0.648879	6.23619e-07	0.0843052	0.016916	7738	0.00319958	24.8314
GCST90027502	P441.PWY..superpathway.of.N.acetylneuraminate.degradation	rs28712495	A	G	0.144073	8.04802e-06	0.104282	0.0233612	7738	0.00256852	19.9213
GCST90027502	P441.PWY..superpathway.of.N.acetylneuraminate.degradation	rs10113343	C	T	0.453618	8.45762e-06	0.0727103	0.0163274	7738	0.00255632	19.8264
GCST90027502	P441.PWY..superpathway.of.N.acetylneuraminate.degradation	rs73217710	A	G	0.0762051	1.95173e-06	0.146879	0.0308675	7738	0.00291754	22.6361
GCST90027502	P441.PWY..superpathway.of.N.acetylneuraminate.degradation	rs10962279	C	T	0.210045	2.29123e-06	-0.0966023	0.0204411	7738	0.00287796	22.3282
GCST90027502	P441.PWY..superpathway.of.N.acetylneuraminate.degradation	rs9416289	T	C	0.618193	6.27989e-06	0.0760858	0.0168453	7738	0.00262953	20.3957
GCST90027502	P441.PWY..superpathway.of.N.acetylneuraminate.degradation	rs17075041	T	A	0.0542748	6.1277e-07	0.192704	0.0386401	7738	0.00320392	24.8652
GCST90027502	P441.PWY..superpathway.of.N.acetylneuraminate.degradation	rs10520129	G	A	0.420966	2.4129e-06	-0.0785513	0.0166586	7738	0.00286519	22.2288
GCST90027502	P441.PWY..superpathway.of.N.acetylneuraminate.degradation	rs11661548	G	A	0.0686943	5.18918e-06	-0.147553	0.0323794	7738	0.00267648	20.7608
GCST90027502	P441.PWY..superpathway.of.N.acetylneuraminate.degradation	rs78776904	A	T	0.0585796	1.60424e-06	0.215774	0.0449735	7738	0.00296595	23.0129
GCST90027503	P461.PWY..hexitol.fermentation.to.lactate..formate..ethanol.and.acetate	rs7529292	C	T	0.176161	9.259e-06	0.0942086	0.0212479	7738	0.00253408	19.6534
GCST90027503	P461.PWY..hexitol.fermentation.to.lactate..formate..ethanol.and.acetate	rs2727894	G	A	0.141778	7.53021e-06	-0.105745	0.0236136	7738	0.00258487	20.0484
GCST90027503	P461.PWY..hexitol.fermentation.to.lactate..formate..ethanol.and.acetate	rs4517983	A	G	0.909549	1.46803e-06	0.139412	0.0289505	7738	0.00298787	23.1834
GCST90027503	P461.PWY..hexitol.fermentation.to.lactate..formate..ethanol.and.acetate	rs76349941	T	C	0.0663034	9.51787e-06	0.148266	0.0334848	7738	0.0025273	19.6008
GCST90027503	P461.PWY..hexitol.fermentation.to.lactate..formate..ethanol.and.acetate	rs4867910	C	T	0.360749	9.10702e-06	0.0778703	0.0175488	7738	0.00253814	19.685
GCST90027503	P461.PWY..hexitol.fermentation.to.lactate..formate..ethanol.and.acetate	rs9368736	C	T	0.0543789	1.36e-06	-0.184482	0.0381888	7738	0.00300675	23.3304
GCST90027503	P461.PWY..hexitol.fermentation.to.lactate..formate..ethanol.and.acetate	rs58118877	T	C	0.451627	5.94723e-06	-0.0757944	0.0167381	7738	0.00264292	20.4998
GCST90027503	P461.PWY..hexitol.fermentation.to.lactate..formate..ethanol.and.acetate	rs2146481	A	T	0.0897767	8.99731e-06	-0.128056	0.0288416	7738	0.00254112	19.7082
GCST90027503	P461.PWY..hexitol.fermentation.to.lactate..formate..ethanol.and.acetate	rs4936953	C	T	0.228271	5.837e-06	-0.0888945	0.0196139	7738	0.00264752	20.5356
GCST90027503	P461.PWY..hexitol.fermentation.to.lactate..formate..ethanol.and.acetate	rs2035940	C	T	0.483609	2.88872e-06	-0.0785142	0.0167816	7738	0.0028208	21.8834
GCST90027503	P461.PWY..hexitol.fermentation.to.lactate..formate..ethanol.and.acetate	rs2398413	C	T	0.82363	4.4439e-06	-0.0996063	0.0217033	7738	0.00271465	21.0577
GCST90027503	P461.PWY..hexitol.fermentation.to.lactate..formate..ethanol.and.acetate	rs36017242	A	G	0.0622116	5.06582e-06	0.162656	0.0356543	7738	0.0026824	20.8069
GCST90027503	P461.PWY..hexitol.fermentation.to.lactate..formate..ethanol.and.acetate	rs4903555	G	A	0.291881	2.03528e-06	-0.0846625	0.0178241	7738	0.00290719	22.5556
GCST90027503	P461.PWY..hexitol.fermentation.to.lactate..formate..ethanol.and.acetate	rs11630596	T	C	0.488776	5.56913e-06	-0.115151	0.0253519	7738	0.00265908	20.6255
GCST90027503	P461.PWY..hexitol.fermentation.to.lactate..formate..ethanol.and.acetate	rs72774370	A	G	0.0715113	5.56969e-06	0.15156	0.0333678	7738	0.00265906	20.6253
GCST90027503	P461.PWY..hexitol.fermentation.to.lactate..formate..ethanol.and.acetate	rs9964901	C	T	0.83041	5.7988e-06	-0.105052	0.0231719	7738	0.00264914	20.5482
GCST90027504	PANTO.PWY..phosphopantothenate.biosynthesis.I	rs1023692	C	T	0.771282	9.73227e-07	-0.097125	0.0198337	7738	0.00308947	23.9742
GCST90027504	PANTO.PWY..phosphopantothenate.biosynthesis.I	rs76292876	G	C	0.0704357	4.53003e-06	-0.148378	0.0323585	7738	0.00270992	21.0209
GCST90027504	PANTO.PWY..phosphopantothenate.biosynthesis.I	rs2367796	T	C	0.144477	6.92832e-06	-0.106754	0.0237448	7738	0.00260536	20.2077
GCST90027504	PANTO.PWY..phosphopantothenate.biosynthesis.I	rs11762494	G	A	0.0770818	5.89572e-08	-0.174502	0.0321844	7738	0.00378471	29.3898
GCST90027504	PANTO.PWY..phosphopantothenate.biosynthesis.I	rs2627353	G	A	0.923649	7.96273e-06	0.13917	0.0311609	7738	0.00257114	19.9416
GCST90027504	PANTO.PWY..phosphopantothenate.biosynthesis.I	rs74949229	A	G	0.0938701	5.571e-06	0.128746	0.0283454	7738	0.002659	20.6249
GCST90027504	PANTO.PWY..phosphopantothenate.biosynthesis.I	rs61857174	A	T	0.122152	4.90923e-07	-0.124248	0.0247022	7738	0.00325882	25.2926
GCST90027504	PANTO.PWY..phosphopantothenate.biosynthesis.I	rs56107021	T	C	0.190545	3.95775e-07	-0.105362	0.0207774	7738	0.00331218	25.7082
GCST90027504	PANTO.PWY..phosphopantothenate.biosynthesis.I	rs4399424	C	T	0.293152	3.38278e-06	-0.083133	0.0178931	7738	0.00278187	21.5806
GCST90027504	PANTO.PWY..phosphopantothenate.biosynthesis.I	rs12907443	G	A	0.382501	7.62067e-07	0.0834953	0.0168853	7738	0.00314996	24.4451
GCST90027504	PANTO.PWY..phosphopantothenate.biosynthesis.I	rs11657406	T	G	0.166064	4.32512e-06	-0.10006	0.0217753	7738	0.00272133	21.1096
GCST90027505	PANTOSYN.PWY..pantothenate.and.coenzyme.A.biosynthesis.I	rs151701	T	C	0.254949	4.99313e-06	0.0863005	0.0189045	7738	0.00268596	20.8345
GCST90027505	PANTOSYN.PWY..pantothenate.and.coenzyme.A.biosynthesis.I	rs73185681	A	G	0.050095	7.70031e-06	-0.175127	0.039149	7738	0.00257938	20.0057
GCST90027505	PANTOSYN.PWY..pantothenate.and.coenzyme.A.biosynthesis.I	rs147398141	T	C	0.0621243	7.37954e-06	-0.151811	0.0338679	7738	0.00258984	20.087
GCST90027505	PANTOSYN.PWY..pantothenate.and.coenzyme.A.biosynthesis.I	rs111776615	A	G	0.173964	8.62631e-06	-0.105552	0.0237248	7738	0.00255147	19.7887
GCST90027505	PANTOSYN.PWY..pantothenate.and.coenzyme.A.biosynthesis.I	rs61844177	C	T	0.316294	2.91329e-06	-0.0814196	0.0174091	7738	0.00281871	21.8672
GCST90027505	PANTOSYN.PWY..pantothenate.and.coenzyme.A.biosynthesis.I	rs2113567	G	T	0.310739	8.0355e-06	0.0780587	0.0174853	7738	0.00256891	19.9243
GCST90027505	PANTOSYN.PWY..pantothenate.and.coenzyme.A.biosynthesis.I	rs2509667	A	C	0.120838	3.73042e-06	-0.117625	0.0254276	7738	0.00275777	21.3931
GCST90027505	PANTOSYN.PWY..pantothenate.and.coenzyme.A.biosynthesis.I	rs9599845	C	T	0.237425	4.8634e-06	0.0930947	0.0203682	7738	0.00269244	20.8849
GCST90027505	PANTOSYN.PWY..pantothenate.and.coenzyme.A.biosynthesis.I	rs11653407	T	A	0.23847	6.35453e-06	0.0860567	0.0190634	7738	0.00262662	20.3731
GCST90027506	PENTOSE.P.PWY..pentose.phosphate.pathway	rs138494236	C	T	0.0597053	5.90211e-06	-0.160724	0.0354809	7738	0.00264479	20.5144
GCST90027506	PENTOSE.P.PWY..pentose.phosphate.pathway	rs1486114	G	T	0.151385	1.83915e-06	-0.107313	0.0224958	7738	0.00293221	22.7503
GCST90027506	PENTOSE.P.PWY..pentose.phosphate.pathway	rs140787604	G	A	0.0518043	7.83435e-06	-0.172453	0.0385831	7738	0.00257514	19.9727
GCST90027506	PENTOSE.P.PWY..pentose.phosphate.pathway	rs12669414	T	C	0.409285	1.89064e-06	-0.0794589	0.0166763	7738	0.00292539	22.6972
GCST90027506	PENTOSE.P.PWY..pentose.phosphate.pathway	rs7856581	C	G	0.0624905	7.95785e-07	0.170656	0.0345709	7738	0.00313925	24.3617
GCST90027506	PENTOSE.P.PWY..pentose.phosphate.pathway	rs12417998	A	G	0.088461	6.76805e-06	-0.129639	0.0288032	7738	0.00261111	20.2525
GCST90027506	PENTOSE.P.PWY..pentose.phosphate.pathway	rs2038820	C	T	0.418697	2.70712e-06	-0.0775464	0.0165278	7738	0.00283681	22.008
GCST90027506	PENTOSE.P.PWY..pentose.phosphate.pathway	rs4399424	C	T	0.293529	6.84696e-06	0.081171	0.0180444	7738	0.00260826	20.2303
GCST90027506	PENTOSE.P.PWY..pentose.phosphate.pathway	rs7181967	C	T	0.205872	2.7361e-06	-0.0960215	0.020475	7738	0.00283419	21.9876
GCST90027506	PENTOSE.P.PWY..pentose.phosphate.pathway	rs12599680	T	C	0.157329	3.6883e-06	-0.104456	0.0225693	7738	0.00276056	21.4148
GCST90027506	PENTOSE.P.PWY..pentose.phosphate.pathway	rs17621104	A	C	0.135319	5.56692e-06	0.113772	0.0250477	7738	0.00265918	20.6263
GCST90027506	PENTOSE.P.PWY..pentose.phosphate.pathway	rs62074577	G	A	0.387202	9.81997e-06	0.0780376	0.0176512	7738	0.00251963	19.5411
GCST90027506	PENTOSE.P.PWY..pentose.phosphate.pathway	rs7228238	T	C	0.41641	1.06138e-06	-0.0811856	0.0166367	7738	0.00306803	23.8073
GCST90027507	PEPTIDOGLYCANSYN.PWY..peptidoglycan.biosynthesis.I..meso.diaminopimelate.containing.	rs6427759	C	A	0.9086	4.42882e-07	-0.146144	0.0289421	7738	0.00328432	25.4912
GCST90027507	PEPTIDOGLYCANSYN.PWY..peptidoglycan.biosynthesis.I..meso.diaminopimelate.containing.	rs7576999	T	C	0.357278	3.59461e-06	-0.0799719	0.0172594	7738	0.00276691	21.4642
GCST90027507	PEPTIDOGLYCANSYN.PWY..peptidoglycan.biosynthesis.I..meso.diaminopimelate.containing.	rs17773637	A	T	0.0583606	7.12971e-06	0.155628	0.0346627	7738	0.00259831	20.1529
GCST90027507	PEPTIDOGLYCANSYN.PWY..peptidoglycan.biosynthesis.I..meso.diaminopimelate.containing.	rs28815855	G	A	0.139873	1.36192e-06	0.112889	0.0233702	7738	0.0030064	23.3277
GCST90027507	PEPTIDOGLYCANSYN.PWY..peptidoglycan.biosynthesis.I..meso.diaminopimelate.containing.	rs17674109	A	G	0.45379	7.52519e-06	0.073469	0.0164057	7738	0.00258504	20.0497
GCST90027507	PEPTIDOGLYCANSYN.PWY..peptidoglycan.biosynthesis.I..meso.diaminopimelate.containing.	rs55935294	C	T	0.436777	2.22902e-06	-0.0776776	0.0164172	7738	0.00288475	22.381
GCST90027507	PEPTIDOGLYCANSYN.PWY..peptidoglycan.biosynthesis.I..meso.diaminopimelate.containing.	rs72809331	A	G	0.0659944	2.74776e-06	-0.174666	0.0372515	7738	0.00283314	21.9794
GCST90027507	PEPTIDOGLYCANSYN.PWY..peptidoglycan.biosynthesis.I..meso.diaminopimelate.containing.	rs57752094	A	C	0.170457	7.17831e-07	0.106925	0.0215729	7738	0.00316476	24.5603
GCST90027507	PEPTIDOGLYCANSYN.PWY..peptidoglycan.biosynthesis.I..meso.diaminopimelate.containing.	rs11254890	G	A	0.0899903	1.65254e-06	-0.1425	0.0297381	7738	0.00295863	22.9558
GCST90027507	PEPTIDOGLYCANSYN.PWY..peptidoglycan.biosynthesis.I..meso.diaminopimelate.containing.	rs77069323	G	C	0.0827472	2.99167e-07	0.157182	0.0306758	7738	0.00338153	26.2483
GCST90027507	PEPTIDOGLYCANSYN.PWY..peptidoglycan.biosynthesis.I..meso.diaminopimelate.containing.	rs17601633	G	A	0.360364	4.7078e-06	-0.0766053	0.0167355	7738	0.00270045	20.9472
GCST90027508	PHOSLIPSYN.PWY..superpathway.of.phospholipid.biosynthesis.I..bacteria.	rs187463	G	T	0.644664	1.93425e-06	-0.0803475	0.0168791	7738	0.00291976	22.6534
GCST90027508	PHOSLIPSYN.PWY..superpathway.of.phospholipid.biosynthesis.I..bacteria.	rs9471554	C	T	0.324334	9.45414e-06	0.0766225	0.017299	7738	0.00252895	19.6136
GCST90027508	PHOSLIPSYN.PWY..superpathway.of.phospholipid.biosynthesis.I..bacteria.	rs12000184	A	G	0.240929	8.18894e-06	-0.0857915	0.019235	7738	0.00256426	19.8881
GCST90027508	PHOSLIPSYN.PWY..superpathway.of.phospholipid.biosynthesis.I..bacteria.	rs77054814	G	A	0.0748263	9.08451e-06	-0.144474	0.0325547	7738	0.00253875	19.6898
GCST90027508	PHOSLIPSYN.PWY..superpathway.of.phospholipid.biosynthesis.I..bacteria.	rs10979829	A	T	0.229883	3.82453e-06	0.0895778	0.0193862	7738	0.00275163	21.3453
GCST90027508	PHOSLIPSYN.PWY..superpathway.of.phospholipid.biosynthesis.I..bacteria.	rs163172	G	A	0.850091	2.8156e-07	0.122222	0.0238	7738	0.00339657	26.3654
GCST90027508	PHOSLIPSYN.PWY..superpathway.of.phospholipid.biosynthesis.I..bacteria.	rs631694	T	C	0.919616	2.8922e-06	0.141866	0.030324	7738	0.0028205	21.8811
GCST90027508	PHOSLIPSYN.PWY..superpathway.of.phospholipid.biosynthesis.I..bacteria.	rs10859752	A	G	0.402186	2.74517e-06	0.0769656	0.016414	7738	0.00283337	21.9812
GCST90027508	PHOSLIPSYN.PWY..superpathway.of.phospholipid.biosynthesis.I..bacteria.	rs78496981	T	C	0.0682182	2.87836e-06	-0.152002	0.0324838	7738	0.00282168	21.8903
GCST90027508	PHOSLIPSYN.PWY..superpathway.of.phospholipid.biosynthesis.I..bacteria.	rs780162	C	G	0.20111	4.59145e-06	-0.0981107	0.0214092	7738	0.00270661	20.9952
GCST90027508	PHOSLIPSYN.PWY..superpathway.of.phospholipid.biosynthesis.I..bacteria.	rs9898722	A	T	0.331339	8.36499e-06	-0.0766573	0.0172046	7738	0.00255903	19.8474
GCST90027508	PHOSLIPSYN.PWY..superpathway.of.phospholipid.biosynthesis.I..bacteria.	rs73104513	T	C	0.144012	5.46407e-06	-0.108511	0.0238689	7738	0.00266377	20.662
GCST90027508	PHOSLIPSYN.PWY..superpathway.of.phospholipid.biosynthesis.I..bacteria.	rs1029249	C	T	0.227143	3.8207e-06	-0.0885882	0.0191712	7738	0.00275187	21.3472
GCST90027509	POLYAMINSYN3.PWY..superpathway.of.polyamine.biosynthesis.II	rs11890644	G	A	0.183125	5.085e-06	0.119734	0.0262502	7738	0.00268147	20.7996
GCST90027509	POLYAMINSYN3.PWY..superpathway.of.polyamine.biosynthesis.II	rs76729673	G	A	0.0906577	3.60455e-06	-0.164494	0.035505	7738	0.00276622	21.4589
GCST90027509	POLYAMINSYN3.PWY..superpathway.of.polyamine.biosynthesis.II	rs7433679	C	T	0.144025	7.38574e-06	-0.1319	0.029427	7738	0.00258964	20.0854
GCST90027509	POLYAMINSYN3.PWY..superpathway.of.polyamine.biosynthesis.II	rs7673044	T	C	0.0978928	3.39935e-06	0.159308	0.0342961	7738	0.00278067	21.5712
GCST90027509	POLYAMINSYN3.PWY..superpathway.of.polyamine.biosynthesis.II	rs258495	A	T	0.61976	3.23584e-06	0.0975198	0.0209483	7738	0.00279282	21.6658
GCST90027509	POLYAMINSYN3.PWY..superpathway.of.polyamine.biosynthesis.II	rs7745701	G	A	0.0845403	5.12139e-06	0.175902	0.0385771	7738	0.00267971	20.786
GCST90027509	POLYAMINSYN3.PWY..superpathway.of.polyamine.biosynthesis.II	rs475221	A	G	0.515585	5.44865e-06	-0.0948327	0.0208574	7738	0.00266447	20.6674
GCST90027509	POLYAMINSYN3.PWY..superpathway.of.polyamine.biosynthesis.II	rs10969036	G	A	0.443972	6.49223e-06	0.0922425	0.0204543	7738	0.00262135	20.3321
GCST90027509	POLYAMINSYN3.PWY..superpathway.of.polyamine.biosynthesis.II	rs12570677	A	T	0.119457	8.22e-06	0.144834	0.0324785	7738	0.00256333	19.8809
GCST90027509	POLYAMINSYN3.PWY..superpathway.of.polyamine.biosynthesis.II	rs11627731	G	A	0.0802933	1.54568e-06	-0.18225	0.0379274	7738	0.00297514	23.0843
GCST90027509	POLYAMINSYN3.PWY..superpathway.of.polyamine.biosynthesis.II	rs58529279	T	C	0.0581069	1.1558e-06	0.219027	0.0450389	7738	0.00304696	23.6433
GCST90027509	POLYAMINSYN3.PWY..superpathway.of.polyamine.biosynthesis.II	rs4566305	G	A	0.684957	6.65857e-07	-0.123803	0.0249048	7738	0.00318336	24.7051
GCST90027510	POLYAMSYN.PWY..superpathway.of.polyamine.biosynthesis.I	rs17543785	G	A	0.265156	8.42769e-06	-0.0837133	0.018795	7738	0.00255719	19.8332
GCST90027510	POLYAMSYN.PWY..superpathway.of.polyamine.biosynthesis.I	rs17786325	C	T	0.687308	9.30207e-06	-0.0768871	0.0173451	7738	0.00253294	19.6446
GCST90027510	POLYAMSYN.PWY..superpathway.of.polyamine.biosynthesis.I	rs4678043	C	T	0.664659	9.00812e-06	-0.0757748	0.0170675	7738	0.00254083	19.7059
GCST90027510	POLYAMSYN.PWY..superpathway.of.polyamine.biosynthesis.I	rs12510598	A	G	0.275054	6.30147e-06	-0.0815199	0.0180513	7738	0.00262869	20.3891
GCST90027510	POLYAMSYN.PWY..superpathway.of.polyamine.biosynthesis.I	rs17161076	G	A	0.228896	7.09491e-06	-0.0856508	0.0190724	7738	0.00259952	20.1623
GCST90027510	POLYAMSYN.PWY..superpathway.of.polyamine.biosynthesis.I	rs79415932	A	G	0.0861367	9.00932e-06	-0.137285	0.0309223	7738	0.00254079	19.7057
GCST90027510	POLYAMSYN.PWY..superpathway.of.polyamine.biosynthesis.I	rs10140803	T	C	0.0691355	6.70713e-06	0.141662	0.031461	7738	0.00261334	20.2698
GCST90027510	POLYAMSYN.PWY..superpathway.of.polyamine.biosynthesis.I	rs80217121	C	T	0.0857864	2.42612e-06	0.141448	0.0300043	7738	0.00286385	22.2183
GCST90027511	POLYISOPRENSYN.PWY..polyisoprenoid.biosynthesis..E..coli.	rs2042558	G	A	0.193068	5.4701e-06	0.160468	0.0352994	7738	0.0026635	20.6599
GCST90027511	POLYISOPRENSYN.PWY..polyisoprenoid.biosynthesis..E..coli.	rs824634	T	C	0.79113	5.90399e-06	-0.15561	0.0343526	7738	0.00264472	20.5138
GCST90027511	POLYISOPRENSYN.PWY..polyisoprenoid.biosynthesis..E..coli.	rs4868691	T	C	0.590829	3.89964e-06	-0.132027	0.028598	7738	0.00274684	21.308
GCST90027511	POLYISOPRENSYN.PWY..polyisoprenoid.biosynthesis..E..coli.	rs6919931	A	G	0.133549	7.2114e-06	0.185259	0.0412847	7738	0.00259551	20.1311
GCST90027511	POLYISOPRENSYN.PWY..polyisoprenoid.biosynthesis..E..coli.	rs12670364	T	C	0.0853551	7.45725e-06	-0.223462	0.0498778	7738	0.00258727	20.067
GCST90027511	POLYISOPRENSYN.PWY..polyisoprenoid.biosynthesis..E..coli.	rs12156527	G	A	0.071851	3.0297e-06	0.258842	0.0554408	7738	0.00280905	21.792
GCST90027511	POLYISOPRENSYN.PWY..polyisoprenoid.biosynthesis..E..coli.	rs12761356	C	T	0.454407	6.17114e-06	-0.123341	0.0272852	7738	0.00263383	20.4291
GCST90027511	POLYISOPRENSYN.PWY..polyisoprenoid.biosynthesis..E..coli.	rs4936253	A	G	0.376581	7.53821e-06	-0.135675	0.0302988	7738	0.00258461	20.0464
GCST90027512	PPGPPMET.PWY..ppGpp.biosynthesis	rs73648437	C	T	0.0744602	1.66061e-06	0.171367	0.0357695	7738	0.00295742	22.9465
GCST90027512	PPGPPMET.PWY..ppGpp.biosynthesis	rs71505230	A	G	0.0503279	2.73161e-06	0.201853	0.0430388	7738	0.00283459	21.9907
GCST90027512	PPGPPMET.PWY..ppGpp.biosynthesis	rs7096411	A	G	0.424831	6.72625e-06	-0.0857703	0.0190509	7738	0.00261264	20.2643
GCST90027512	PPGPPMET.PWY..ppGpp.biosynthesis	rs10767786	T	C	0.388995	5.88481e-06	0.0852294	0.0188124	7738	0.00264552	20.52
GCST90027512	PPGPPMET.PWY..ppGpp.biosynthesis	rs10783794	G	A	0.386545	3.70938e-06	0.088903	0.0192138	7738	0.00275916	21.4039
GCST90027512	PPGPPMET.PWY..ppGpp.biosynthesis	rs4767337	C	A	0.188831	4.50525e-06	-0.108238	0.0235988	7738	0.00271128	21.0315
GCST90027512	PPGPPMET.PWY..ppGpp.biosynthesis	rs2098065	A	G	0.527631	4.32294e-06	0.0937673	0.0204054	7738	0.00272145	21.1106
GCST90027512	PPGPPMET.PWY..ppGpp.biosynthesis	rs60898162	A	G	0.332184	6.99811e-06	0.090114	0.0200532	7738	0.00260289	20.1885
GCST90027512	PPGPPMET.PWY..ppGpp.biosynthesis	rs8098406	A	G	0.475509	8.23502e-06	0.0833677	0.0186966	7738	0.00256288	19.8774
GCST90027512	PPGPPMET.PWY..ppGpp.biosynthesis	rs10404465	A	T	0.241021	3.13615e-06	0.100853	0.0216345	7738	0.00280054	21.7258
GCST90027512	PPGPPMET.PWY..ppGpp.biosynthesis	rs743920	G	C	0.128345	7.5948e-06	-0.139891	0.0312514	7738	0.00258277	20.0321
GCST90027513	PRPP.PWY..superpathway.of.histidine..purine..and.pyrimidine.biosynthesis	rs857044	A	T	0.282083	7.01345e-06	0.0822036	0.0182948	7738	0.00260236	20.1843
GCST90027513	PRPP.PWY..superpathway.of.histidine..purine..and.pyrimidine.biosynthesis	rs61733531	T	C	0.171229	6.22171e-06	0.100089	0.0221499	7738	0.00263182	20.4135
GCST90027513	PRPP.PWY..superpathway.of.histidine..purine..and.pyrimidine.biosynthesis	rs60152513	A	G	0.0814397	4.58105e-06	-0.140131	0.0305756	7738	0.00270717	20.9995
GCST90027513	PRPP.PWY..superpathway.of.histidine..purine..and.pyrimidine.biosynthesis	rs13080908	G	A	0.165509	1.74186e-06	0.105164	0.0219949	7738	0.00294563	22.8547
GCST90027513	PRPP.PWY..superpathway.of.histidine..purine..and.pyrimidine.biosynthesis	rs12549221	C	T	0.787149	9.05537e-06	0.0961229	0.0216562	7738	0.00253954	19.6959
GCST90027513	PRPP.PWY..superpathway.of.histidine..purine..and.pyrimidine.biosynthesis	rs12359494	T	C	0.559445	9.79046e-06	0.0720598	0.0162967	7738	0.00252037	19.5468
GCST90027513	PRPP.PWY..superpathway.of.histidine..purine..and.pyrimidine.biosynthesis	rs73314327	C	T	0.269055	4.44571e-06	0.0842558	0.0183589	7738	0.00271455	21.0569
GCST90027513	PRPP.PWY..superpathway.of.histidine..purine..and.pyrimidine.biosynthesis	rs1526953	C	A	0.0584859	5.1697e-06	0.15864	0.0348064	7738	0.0026774	20.768
GCST90027513	PRPP.PWY..superpathway.of.histidine..purine..and.pyrimidine.biosynthesis	rs72686468	G	A	0.069932	2.07493e-06	0.152768	0.0321889	7738	0.00290243	22.5186
GCST90027513	PRPP.PWY..superpathway.of.histidine..purine..and.pyrimidine.biosynthesis	rs2923143	A	G	0.263102	2.86003e-07	-0.0973735	0.0189722	7738	0.00339269	26.3352
GCST90027513	PRPP.PWY..superpathway.of.histidine..purine..and.pyrimidine.biosynthesis	rs4889160	A	G	0.228647	4.83652e-06	0.0891387	0.0194977	7738	0.0026938	20.8956
GCST90027513	PRPP.PWY..superpathway.of.histidine..purine..and.pyrimidine.biosynthesis	rs2406211	C	T	0.416967	4.5811e-06	-0.0760629	0.0165964	7738	0.00270716	20.9995
GCST90027513	PRPP.PWY..superpathway.of.histidine..purine..and.pyrimidine.biosynthesis	rs111364229	C	G	0.0892174	7.12585e-06	-0.136952	0.0305024	7738	0.00259845	20.1539
GCST90027513	PRPP.PWY..superpathway.of.histidine..purine..and.pyrimidine.biosynthesis	rs237483	A	C	0.572926	9.66043e-06	0.072289	0.0163378	7738	0.00252365	19.5724
GCST90027514	PWY0.1061..superpathway.of.L.alanine.biosynthesis	rs2640045	T	C	0.448329	1.83358e-06	0.104422	0.021887	7738	0.00293296	22.7561
GCST90027514	PWY0.1061..superpathway.of.L.alanine.biosynthesis	rs57070266	C	T	0.0895804	8.68039e-06	-0.167376	0.0376323	7738	0.00254993	19.7767
GCST90027514	PWY0.1061..superpathway.of.L.alanine.biosynthesis	rs2197911	A	G	0.863153	3.31052e-06	-0.135967	0.0292369	7738	0.0027872	21.622
GCST90027514	PWY0.1061..superpathway.of.L.alanine.biosynthesis	rs76726314	A	G	0.0531755	3.99345e-06	0.206201	0.0447123	7738	0.00274098	21.2625
GCST90027514	PWY0.1061..superpathway.of.L.alanine.biosynthesis	rs2636908	C	T	0.0721462	4.8983e-07	0.224474	0.0446249	7738	0.00325937	25.2969
GCST90027514	PWY0.1061..superpathway.of.L.alanine.biosynthesis	rs4580784	A	G	0.0617492	3.7495e-06	-0.210802	0.0455807	7738	0.00275651	21.3833
GCST90027514	PWY0.1061..superpathway.of.L.alanine.biosynthesis	rs62385620	A	T	0.111596	1.59347e-06	0.163648	0.0340993	7738	0.00296762	23.0258
GCST90027514	PWY0.1061..superpathway.of.L.alanine.biosynthesis	rs7840028	T	C	0.0810718	3.0224e-06	0.175219	0.0375257	7738	0.00280964	21.7967
GCST90027514	PWY0.1061..superpathway.of.L.alanine.biosynthesis	rs17777155	G	A	0.115793	3.62924e-06	-0.150878	0.0325761	7738	0.00276454	21.4458
GCST90027514	PWY0.1061..superpathway.of.L.alanine.biosynthesis	rs7947704	T	C	0.0953912	7.16773e-06	0.156566	0.0348804	7738	0.002597	20.1427
GCST90027515	PWY0.1241..ADP.L.glycero..beta..D.manno.heptose.biosynthesis	rs71420343	C	T	0.164126	4.21994e-06	0.138554	0.0301188	7738	0.00272739	21.1568
GCST90027515	PWY0.1241..ADP.L.glycero..beta..D.manno.heptose.biosynthesis	rs13007128	T	C	0.443255	6.62602e-06	0.106983	0.0237458	7738	0.00261633	20.293
GCST90027515	PWY0.1241..ADP.L.glycero..beta..D.manno.heptose.biosynthesis	rs4629160	G	A	0.778644	7.85889e-06	0.117549	0.0263033	7738	0.00257437	19.9667
GCST90027515	PWY0.1241..ADP.L.glycero..beta..D.manno.heptose.biosynthesis	rs12633789	A	G	0.102012	3.7834e-06	0.171793	0.037161	7738	0.00275429	21.366
GCST90027515	PWY0.1241..ADP.L.glycero..beta..D.manno.heptose.biosynthesis	rs10866668	G	C	0.476055	5.42256e-06	0.102054	0.0224407	7738	0.00266565	20.6766
GCST90027515	PWY0.1241..ADP.L.glycero..beta..D.manno.heptose.biosynthesis	rs3923652	C	A	0.103319	4.60145e-06	-0.163821	0.0357516	7738	0.00270607	20.991
GCST90027515	PWY0.1241..ADP.L.glycero..beta..D.manno.heptose.biosynthesis	rs6581517	T	A	0.36771	9.1264e-06	0.103616	0.0233533	7738	0.00253762	19.681
GCST90027515	PWY0.1241..ADP.L.glycero..beta..D.manno.heptose.biosynthesis	rs1444625	G	C	0.130907	9.9163e-07	-0.161047	0.0329118	7738	0.00308483	23.9381
GCST90027515	PWY0.1241..ADP.L.glycero..beta..D.manno.heptose.biosynthesis	rs17175056	G	A	0.122605	4.39371e-06	0.152298	0.0331672	7738	0.00271745	21.0795
GCST90027515	PWY0.1241..ADP.L.glycero..beta..D.manno.heptose.biosynthesis	rs9923601	A	G	0.0630599	9.19584e-06	0.200457	0.045196	7738	0.00253576	19.6665
GCST90027516	PWY0.1261..anhydromuropeptides.recycling	rs11588833	G	A	0.0865587	9.71395e-06	-0.131667	0.0297656	7738	0.00252229	19.5618
GCST90027516	PWY0.1261..anhydromuropeptides.recycling	rs7544236	C	T	0.360295	2.45954e-06	0.0825818	0.0175279	7738	0.00286047	22.1921
GCST90027516	PWY0.1261..anhydromuropeptides.recycling	rs11707688	T	C	0.157658	9.35112e-06	-0.109234	0.0246485	7738	0.00253165	19.6345
GCST90027516	PWY0.1261..anhydromuropeptides.recycling	rs59853081	T	C	0.280601	8.5312e-06	-0.0841117	0.0188956	7738	0.00255419	19.8098
GCST90027516	PWY0.1261..anhydromuropeptides.recycling	rs10504039	C	T	0.15413	7.24967e-06	-0.101677	0.0226642	7738	0.00259421	20.121
GCST90027516	PWY0.1261..anhydromuropeptides.recycling	rs4501561	C	T	0.840069	6.62688e-06	0.105819	0.0234874	7738	0.0026163	20.2928
GCST90027516	PWY0.1261..anhydromuropeptides.recycling	rs7964114	C	T	0.240609	3.01447e-06	0.0920566	0.0197131	7738	0.00281029	21.8017
GCST90027516	PWY0.1261..anhydromuropeptides.recycling	rs7228238	T	C	0.416673	7.15332e-07	-0.0837211	0.0168889	7738	0.00316562	24.567
GCST90027517	PWY0.1296..purine.ribonucleosides.degradation	rs9286959	A	T	0.438789	1.59828e-06	0.0807536	0.0168288	7738	0.00296687	23.02
GCST90027517	PWY0.1296..purine.ribonucleosides.degradation	rs6669249	C	A	0.756591	4.65758e-06	-0.0853442	0.0186355	7738	0.00270309	20.9678
GCST90027517	PWY0.1296..purine.ribonucleosides.degradation	rs416270	T	G	0.265633	4.74789e-06	-0.0856028	0.0187084	7738	0.00269836	20.931
GCST90027517	PWY0.1296..purine.ribonucleosides.degradation	rs7699343	T	C	0.173113	9.33899e-06	0.0948032	0.0213909	7738	0.00253196	19.637
GCST90027517	PWY0.1296..purine.ribonucleosides.degradation	rs1468579	T	C	0.256093	1.57458e-06	-0.0929607	0.0193606	7738	0.00297056	23.0487
GCST90027517	PWY0.1296..purine.ribonucleosides.degradation	rs76985731	C	T	0.0534186	8.76703e-07	0.180318	0.0366688	7738	0.0031153	24.1753
GCST90027517	PWY0.1296..purine.ribonucleosides.degradation	rs12915465	C	T	0.0932693	2.27852e-06	0.132221	0.0279715	7738	0.00287933	22.3388
GCST90027517	PWY0.1296..purine.ribonucleosides.degradation	rs2425056	A	G	0.344212	9.93783e-06	-0.0745895	0.0168811	7738	0.0025167	19.5183
GCST90027518	PWY0.1297..superpathway.of.purine.deoxyribonucleosides.degradation	rs7608101	C	T	0.283873	5.23758e-06	0.0836171	0.0183571	7738	0.00267419	20.743
GCST90027518	PWY0.1297..superpathway.of.purine.deoxyribonucleosides.degradation	rs17639960	C	T	0.156483	2.13807e-06	-0.109664	0.0231362	7738	0.00289503	22.461
GCST90027518	PWY0.1297..superpathway.of.purine.deoxyribonucleosides.degradation	rs7349706	C	A	0.345869	4.30606e-06	0.0810335	0.0176312	7738	0.00272241	21.1181
GCST90027518	PWY0.1297..superpathway.of.purine.deoxyribonucleosides.degradation	rs2914928	C	T	0.307512	4.31704e-06	-0.0816632	0.0177702	7738	0.00272179	21.1132
GCST90027518	PWY0.1297..superpathway.of.purine.deoxyribonucleosides.degradation	rs35108480	C	G	0.297202	9.51119e-06	0.0804747	0.0181741	7738	0.00252748	19.6021
GCST90027518	PWY0.1297..superpathway.of.purine.deoxyribonucleosides.degradation	rs12700304	T	G	0.250107	3.28354e-06	0.0872428	0.0187529	7738	0.00278921	21.6377
GCST90027518	PWY0.1297..superpathway.of.purine.deoxyribonucleosides.degradation	rs9527167	G	A	0.17668	1.37947e-06	0.110794	0.0229484	7738	0.00300324	23.3031
GCST90027518	PWY0.1297..superpathway.of.purine.deoxyribonucleosides.degradation	rs11543947	A	G	0.069182	3.33392e-07	-0.173247	0.0339465	7738	0.00335468	26.0392
GCST90027518	PWY0.1297..superpathway.of.purine.deoxyribonucleosides.degradation	rs111171	G	A	0.729093	8.20026e-07	-0.0924102	0.0187424	7738	0.00313183	24.3039
GCST90027518	PWY0.1297..superpathway.of.purine.deoxyribonucleosides.degradation	rs1009644	C	T	0.591879	6.95846e-06	-0.0744787	0.0165694	7738	0.00260429	20.1994
GCST90027519	PWY0.1298..superpathway.of.pyrimidine.deoxyribonucleosides.degradation	rs62248586	T	G	0.375075	3.90928e-06	-0.0795788	0.0172392	7738	0.00274623	21.3033
GCST90027519	PWY0.1298..superpathway.of.pyrimidine.deoxyribonucleosides.degradation	rs2309464	G	T	0.24989	7.5821e-06	0.0854547	0.019089	7738	0.00258319	20.0353
GCST90027519	PWY0.1298..superpathway.of.pyrimidine.deoxyribonucleosides.degradation	rs257077	T	G	0.82837	4.6917e-06	-0.101168	0.0220981	7738	0.00270129	20.9538
GCST90027519	PWY0.1298..superpathway.of.pyrimidine.deoxyribonucleosides.degradation	rs11957688	C	T	0.060138	6.20474e-06	0.15521	0.0343438	7738	0.00263249	20.4187
GCST90027519	PWY0.1298..superpathway.of.pyrimidine.deoxyribonucleosides.degradation	rs997227	A	C	0.412248	4.7369e-06	-0.077565	0.01695	7738	0.00269893	20.9354
GCST90027519	PWY0.1298..superpathway.of.pyrimidine.deoxyribonucleosides.degradation	rs6944623	C	G	0.844165	4.60103e-06	0.10404	0.0227051	7738	0.0027061	20.9912
GCST90027519	PWY0.1298..superpathway.of.pyrimidine.deoxyribonucleosides.degradation	rs1467160	G	T	0.459531	6.16361e-06	-0.0751674	0.0166274	7738	0.00263413	20.4314
GCST90027519	PWY0.1298..superpathway.of.pyrimidine.deoxyribonucleosides.degradation	rs56332785	T	C	0.320611	6.21765e-06	0.0801429	0.0177352	7738	0.00263198	20.4147
GCST90027519	PWY0.1298..superpathway.of.pyrimidine.deoxyribonucleosides.degradation	rs7859597	G	A	0.257566	4.6906e-06	0.0846329	0.0184862	7738	0.00270135	20.9542
GCST90027519	PWY0.1298..superpathway.of.pyrimidine.deoxyribonucleosides.degradation	rs79103551	T	C	0.0647766	4.65804e-06	0.152765	0.0333575	7738	0.00270306	20.9676
GCST90027519	PWY0.1298..superpathway.of.pyrimidine.deoxyribonucleosides.degradation	rs77470149	A	G	0.0523097	2.67255e-06	0.171368	0.0365039	7738	0.00283998	22.0327
GCST90027519	PWY0.1298..superpathway.of.pyrimidine.deoxyribonucleosides.degradation	rs17185203	A	C	0.277257	6.79892e-06	-0.0819107	0.0182028	7738	0.00261	20.2438
GCST90027519	PWY0.1298..superpathway.of.pyrimidine.deoxyribonucleosides.degradation	rs7138789	A	G	0.113296	7.00926e-06	0.119569	0.0266099	7738	0.0026025	20.1855
GCST90027519	PWY0.1298..superpathway.of.pyrimidine.deoxyribonucleosides.degradation	rs73169038	G	A	0.0739753	5.03503e-06	-0.141377	0.0309812	7738	0.0026839	20.8185
GCST90027519	PWY0.1298..superpathway.of.pyrimidine.deoxyribonucleosides.degradation	rs3785328	G	A	0.0679896	3.09922e-07	-0.16513	0.0322689	7738	0.00337278	26.1801
GCST90027520	PWY0.1338..polymyxin.resistance	rs12472695	T	C	0.299909	3.2313e-06	0.149611	0.032136	7738	0.00279317	21.6685
GCST90027520	PWY0.1338..polymyxin.resistance	rs3106302	T	C	0.617457	5.82976e-06	0.162574	0.0358688	7738	0.00264783	20.538
GCST90027520	PWY0.1338..polymyxin.resistance	rs13140831	A	G	0.548186	9.54458e-06	0.139782	0.0315732	7738	0.00252661	19.5954
GCST90027520	PWY0.1338..polymyxin.resistance	rs12718724	T	C	0.119583	6.41557e-06	-0.202477	0.0448731	7738	0.00262427	20.3548
GCST90027520	PWY0.1338..polymyxin.resistance	rs884587	T	C	0.343527	8.83737e-06	0.143447	0.0322801	7738	0.00254553	19.7425
GCST90027520	PWY0.1338..polymyxin.resistance	rs7478946	T	C	0.612149	5.68823e-06	-0.143621	0.0316509	7738	0.00265388	20.585
GCST90027520	PWY0.1338..polymyxin.resistance	rs4942275	T	C	0.141655	5.93646e-08	0.224867	0.041483	7738	0.003783	29.3764
GCST90027520	PWY0.1338..polymyxin.resistance	rs76296650	G	A	0.123104	1.31768e-07	-0.241937	0.045853	7738	0.00358494	27.8329
GCST90027520	PWY0.1338..polymyxin.resistance	rs7225041	C	G	0.317453	3.03832e-06	-0.154749	0.0331496	7738	0.00280835	21.7866
GCST90027520	PWY0.1338..polymyxin.resistance	rs135184	T	A	0.788217	6.97381e-06	0.177769	0.0395527	7738	0.00260375	20.1952
GCST90027521	PWY0.1415..superpathway.of.heme.biosynthesis.from.uroporphyrinogen.III	rs62174134	T	C	0.209295	2.66008e-06	-0.156658	0.0333638	7738	0.00284113	22.0416
GCST90027521	PWY0.1415..superpathway.of.heme.biosynthesis.from.uroporphyrinogen.III	rs2636908	C	T	0.0737234	2.99373e-06	0.277949	0.0595021	7738	0.00281199	21.8149
GCST90027521	PWY0.1415..superpathway.of.heme.biosynthesis.from.uroporphyrinogen.III	rs6451170	A	G	0.550576	4.26036e-06	0.125289	0.027247	7738	0.00272504	21.1385
GCST90027521	PWY0.1415..superpathway.of.heme.biosynthesis.from.uroporphyrinogen.III	rs17698956	G	A	0.148196	4.16023e-06	-0.175101	0.038039	7738	0.0027309	21.1841
GCST90027521	PWY0.1415..superpathway.of.heme.biosynthesis.from.uroporphyrinogen.III	rs1051765	G	A	0.101125	3.20215e-06	-0.208775	0.0448265	7738	0.0027954	21.6858
GCST90027521	PWY0.1415..superpathway.of.heme.biosynthesis.from.uroporphyrinogen.III	rs7111124	A	T	0.558852	6.79851e-06	-0.119194	0.0264881	7738	0.00261001	20.2439
GCST90027521	PWY0.1415..superpathway.of.heme.biosynthesis.from.uroporphyrinogen.III	rs942033	T	C	0.591911	2.5839e-06	0.130758	0.0278127	7738	0.0028483	22.0974
GCST90027521	PWY0.1415..superpathway.of.heme.biosynthesis.from.uroporphyrinogen.III	rs4238492	G	A	0.546024	1.40031e-06	0.128463	0.0266247	7738	0.00299954	23.2742
GCST90027521	PWY0.1415..superpathway.of.heme.biosynthesis.from.uroporphyrinogen.III	rs9619066	T	C	0.124649	1.48577e-07	-0.223827	0.0425987	7738	0.00355514	27.6007
GCST90027522	PWY0.1479..tRNA.processing	rs74678487	A	C	0.207004	4.22563e-07	-0.126224	0.0249529	7738	0.00329596	25.5818
GCST90027522	PWY0.1479..tRNA.processing	rs1635513	C	A	0.756081	7.81406e-06	-0.0905622	0.020259	7738	0.00257578	19.9777
GCST90027522	PWY0.1479..tRNA.processing	rs1851324	A	G	0.0702002	2.26392e-06	-0.161975	0.0342564	7738	0.00288092	22.3512
GCST90027522	PWY0.1479..tRNA.processing	rs17604176	C	T	0.517267	2.21878e-06	0.0825736	0.0174486	7738	0.00288589	22.3898
GCST90027522	PWY0.1479..tRNA.processing	rs10253848	T	C	0.200092	6.56516e-06	-0.0990509	0.0219756	7738	0.0026186	20.3107
GCST90027522	PWY0.1479..tRNA.processing	rs2806453	T	C	0.0552986	6.00737e-06	-0.188753	0.0417029	7738	0.00264044	20.4806
GCST90027522	PWY0.1479..tRNA.processing	rs1553705	G	A	0.200628	8.24949e-06	-0.0993456	0.0222818	7738	0.00256245	19.874
GCST90027522	PWY0.1479..tRNA.processing	rs882051	T	C	0.0806239	1.2848e-06	-0.168605	0.0348207	7738	0.00302081	23.4398
GCST90027522	PWY0.1479..tRNA.processing	rs11076031	G	A	0.710524	9.89578e-06	0.0847081	0.0191672	7738	0.00251774	19.5264
GCST90027522	PWY0.1479..tRNA.processing	rs9972917	A	C	0.138195	7.28741e-06	0.112943	0.0251817	7738	0.00259293	20.1111
GCST90027522	PWY0.1479..tRNA.processing	rs651761	G	A	0.606234	4.91574e-06	-0.0822431	0.0180028	7738	0.0026898	20.8644
GCST90027523	PWY0.1533..methylphosphonate.degradation.I	rs2884357	T	C	0.541334	9.1135e-06	0.124817	0.0281297	7738	0.00253797	19.6837
GCST90027523	PWY0.1533..methylphosphonate.degradation.I	rs10433369	A	T	0.216065	8.51653e-06	-0.152536	0.0342642	7738	0.00255462	19.8131
GCST90027523	PWY0.1533..methylphosphonate.degradation.I	rs12719662	C	A	0.276985	7.89953e-06	-0.138676	0.0310384	7738	0.0025731	19.9569
GCST90027523	PWY0.1533..methylphosphonate.degradation.I	rs61861701	G	A	0.250813	5.98021e-07	0.167195	0.0334935	7738	0.00320995	24.9122
GCST90027523	PWY0.1533..methylphosphonate.degradation.I	rs12921798	A	G	0.062306	1.67113e-06	0.284	0.0592952	7738	0.00295586	22.9343
GCST90027523	PWY0.1533..methylphosphonate.degradation.I	rs6009311	A	C	0.122084	8.20701e-06	0.194241	0.0435545	7738	0.00256372	19.8839
GCST90027524	PWY0.1586..peptidoglycan.maturation..meso.diaminopimelate.containing.	rs2582975	A	T	0.0858736	5.56639e-06	0.13136	0.0289197	7738	0.00265921	20.6265
GCST90027524	PWY0.1586..peptidoglycan.maturation..meso.diaminopimelate.containing.	rs72744985	C	G	0.211681	8.93784e-06	-0.0876611	0.0197373	7738	0.00254275	19.7209
GCST90027524	PWY0.1586..peptidoglycan.maturation..meso.diaminopimelate.containing.	rs295654	T	C	0.552585	9.33679e-06	0.0725749	0.0163752	7738	0.00253202	19.6374
GCST90027524	PWY0.1586..peptidoglycan.maturation..meso.diaminopimelate.containing.	rs6870833	G	A	0.944468	8.33494e-06	0.164484	0.0369097	7738	0.00255991	19.8543
GCST90027524	PWY0.1586..peptidoglycan.maturation..meso.diaminopimelate.containing.	rs11752725	A	G	0.220828	4.21864e-06	-0.0899095	0.0195442	7738	0.00272746	21.1574
GCST90027524	PWY0.1586..peptidoglycan.maturation..meso.diaminopimelate.containing.	rs1407463	A	G	0.243409	4.17386e-06	0.0864995	0.0187939	7738	0.00273009	21.1778
GCST90027524	PWY0.1586..peptidoglycan.maturation..meso.diaminopimelate.containing.	rs73647057	C	T	0.0596017	5.78969e-06	0.156754	0.0345735	7738	0.00264953	20.5512
GCST90027524	PWY0.1586..peptidoglycan.maturation..meso.diaminopimelate.containing.	rs74574052	A	G	0.0762527	6.32928e-08	0.170934	0.0316003	7738	0.00376708	29.2523
GCST90027524	PWY0.1586..peptidoglycan.maturation..meso.diaminopimelate.containing.	rs80161029	G	A	0.184043	5.0174e-06	0.0988357	0.0216552	7738	0.00268476	20.8252
GCST90027525	PWY0.162..superpathway.of.pyrimidine.ribonucleotides.de.novo.biosynthesis	rs17365730	C	T	0.0926492	8.16603e-07	-0.157374	0.0319129	7738	0.00313286	24.312
GCST90027525	PWY0.162..superpathway.of.pyrimidine.ribonucleotides.de.novo.biosynthesis	rs12408719	T	C	0.0764169	2.61703e-06	-0.144912	0.0308402	7738	0.00284516	22.073
GCST90027525	PWY0.162..superpathway.of.pyrimidine.ribonucleotides.de.novo.biosynthesis	rs9876083	G	A	0.301164	2.07361e-06	0.0831467	0.0175189	7738	0.00290259	22.5198
GCST90027525	PWY0.162..superpathway.of.pyrimidine.ribonucleotides.de.novo.biosynthesis	rs9460615	T	C	0.0617234	2.76731e-06	0.162344	0.0346343	7738	0.00283139	21.9658
GCST90027525	PWY0.162..superpathway.of.pyrimidine.ribonucleotides.de.novo.biosynthesis	rs12199072	A	T	0.0531609	5.91902e-06	-0.173948	0.0384053	7738	0.00264409	20.5089
GCST90027525	PWY0.162..superpathway.of.pyrimidine.ribonucleotides.de.novo.biosynthesis	rs2325098	T	C	0.422317	5.60891e-07	-0.0813327	0.0162528	7738	0.00322582	25.0357
GCST90027525	PWY0.162..superpathway.of.pyrimidine.ribonucleotides.de.novo.biosynthesis	rs706948	G	T	0.170836	6.3934e-06	0.0988291	0.021899	7738	0.00262512	20.3614
GCST90027525	PWY0.162..superpathway.of.pyrimidine.ribonucleotides.de.novo.biosynthesis	rs73120083	G	A	0.0609189	7.28869e-06	-0.160197	0.0357177	7738	0.00259289	20.1107
GCST90027525	PWY0.162..superpathway.of.pyrimidine.ribonucleotides.de.novo.biosynthesis	rs34070159	T	C	0.140701	1.98102e-06	-0.116597	0.0245192	7738	0.00291386	22.6075
GCST90027525	PWY0.162..superpathway.of.pyrimidine.ribonucleotides.de.novo.biosynthesis	rs7812884	A	G	0.0802829	5.83175e-06	0.134223	0.0296141	7738	0.00264775	20.5373
GCST90027525	PWY0.162..superpathway.of.pyrimidine.ribonucleotides.de.novo.biosynthesis	rs79249788	C	T	0.0743671	3.71337e-06	-0.1511	0.0326575	7738	0.0027589	21.4019
GCST90027525	PWY0.162..superpathway.of.pyrimidine.ribonucleotides.de.novo.biosynthesis	rs883271	G	A	0.306345	3.98785e-06	0.0807466	0.0175079	7738	0.00274132	21.2652
GCST90027526	PWY0.781..aspartate.superpathway	rs59244529	T	C	0.151476	6.15048e-06	0.104891	0.0232	7738	0.00263465	20.4355
GCST90027526	PWY0.781..aspartate.superpathway	rs4845710	A	G	0.0537267	6.35341e-06	0.16966	0.037583	7738	0.00262667	20.3734
GCST90027526	PWY0.781..aspartate.superpathway	rs10930969	A	G	0.193414	5.98703e-06	-0.0948247	0.0209472	7738	0.00264128	20.487
GCST90027526	PWY0.781..aspartate.superpathway	rs36057901	A	G	0.0551178	9.48457e-06	-0.159157	0.0359385	7738	0.00252816	19.6075
GCST90027526	PWY0.781..aspartate.superpathway	rs2523969	T	A	0.136108	9.65458e-06	0.105806	0.0239121	7738	0.0025238	19.5735
GCST90027526	PWY0.781..aspartate.superpathway	rs1266788	A	G	0.615349	1.4272e-06	0.0807865	0.0167566	7738	0.00299484	23.2376
GCST90027526	PWY0.781..aspartate.superpathway	rs10953974	T	G	0.12518	3.60925e-06	-0.113712	0.0245455	7738	0.0027659	21.4564
GCST90027526	PWY0.781..aspartate.superpathway	rs77354939	T	C	0.0665235	3.24753e-06	0.163124	0.0350464	7738	0.00279193	21.6589
GCST90027526	PWY0.781..aspartate.superpathway	rs35751200	G	A	0.0586888	8.67475e-07	0.174336	0.0354376	7738	0.00311791	24.1956
GCST90027526	PWY0.781..aspartate.superpathway	rs61945524	T	C	0.30013	3.43149e-06	-0.0852612	0.0183628	7738	0.00277835	21.5532
GCST90027526	PWY0.781..aspartate.superpathway	rs4802635	G	A	0.551957	6.70991e-06	0.0738678	0.0164053	7738	0.00261324	20.269
GCST90027527	PWY0.845..superpathway.of.pyridoxal.5..phosphate.biosynthesis.and.salvage	rs79328165	C	T	0.0575442	8.11284e-06	-0.160656	0.0360039	7738	0.00256655	19.9059
GCST90027527	PWY0.845..superpathway.of.pyridoxal.5..phosphate.biosynthesis.and.salvage	rs4857976	G	A	0.878392	1.31786e-06	0.132735	0.0274414	7738	0.00301453	23.3909
GCST90027527	PWY0.845..superpathway.of.pyridoxal.5..phosphate.biosynthesis.and.salvage	rs9842222	T	C	0.232721	5.36032e-06	0.0874308	0.0192148	7738	0.00266849	20.6987
GCST90027527	PWY0.845..superpathway.of.pyridoxal.5..phosphate.biosynthesis.and.salvage	rs12508123	T	C	0.226339	8.53953e-07	0.0969126	0.0196872	7738	0.0031218	24.2259
GCST90027527	PWY0.845..superpathway.of.pyridoxal.5..phosphate.biosynthesis.and.salvage	rs1980434	G	A	0.072802	5.56672e-06	0.215529	0.0474503	7738	0.00265919	20.6264
GCST90027527	PWY0.845..superpathway.of.pyridoxal.5..phosphate.biosynthesis.and.salvage	rs4720493	A	G	0.133009	9.93783e-06	-0.106574	0.0241198	7738	0.0025167	19.5183
GCST90027527	PWY0.845..superpathway.of.pyridoxal.5..phosphate.biosynthesis.and.salvage	rs10096075	C	G	0.361804	8.96643e-06	0.0755231	0.017007	7738	0.00254197	19.7148
GCST90027527	PWY0.845..superpathway.of.pyridoxal.5..phosphate.biosynthesis.and.salvage	rs7102851	C	T	0.271372	6.35247e-07	-0.0927676	0.0186274	7738	0.00319501	24.7958
GCST90027527	PWY0.845..superpathway.of.pyridoxal.5..phosphate.biosynthesis.and.salvage	rs2039970	T	C	0.633971	2.97465e-06	0.0794238	0.0169979	7738	0.00281357	21.8272
GCST90027527	PWY0.845..superpathway.of.pyridoxal.5..phosphate.biosynthesis.and.salvage	rs17699454	C	A	0.685024	3.505e-06	0.0827054	0.0178292	7738	0.00277313	21.5126
GCST90027527	PWY0.845..superpathway.of.pyridoxal.5..phosphate.biosynthesis.and.salvage	rs11859534	A	G	0.0716874	8.41976e-06	0.153904	0.0345524	7738	0.00255743	19.835
GCST90027527	PWY0.845..superpathway.of.pyridoxal.5..phosphate.biosynthesis.and.salvage	rs7186220	A	G	0.191862	7.88722e-06	0.0932665	0.0208733	7738	0.00257349	19.9599
GCST90027527	PWY0.845..superpathway.of.pyridoxal.5..phosphate.biosynthesis.and.salvage	rs80049853	A	G	0.0720914	3.91722e-06	0.144856	0.031383	7738	0.00274573	21.2994
GCST90027527	PWY0.845..superpathway.of.pyridoxal.5..phosphate.biosynthesis.and.salvage	rs4797215	A	G	0.0941791	8.32259e-06	0.124319	0.0278948	7738	0.00256028	19.8572
GCST90027527	PWY0.845..superpathway.of.pyridoxal.5..phosphate.biosynthesis.and.salvage	rs2703175	G	A	0.870736	2.41528e-06	0.114277	0.0242361	7738	0.00286495	22.2269
GCST90027527	PWY0.845..superpathway.of.pyridoxal.5..phosphate.biosynthesis.and.salvage	rs28493178	T	A	0.14811	8.63964e-06	0.104735	0.023543	7738	0.00255109	19.7857
GCST90027527	PWY0.845..superpathway.of.pyridoxal.5..phosphate.biosynthesis.and.salvage	rs384592	G	A	0.13778	5.11895e-06	0.118355	0.0259559	7738	0.00267983	20.7869
GCST90027527	PWY0.845..superpathway.of.pyridoxal.5..phosphate.biosynthesis.and.salvage	rs73196427	T	C	0.125452	9.82523e-06	-0.11369	0.0257159	7738	0.0025195	19.54
GCST90027527	PWY0.845..superpathway.of.pyridoxal.5..phosphate.biosynthesis.and.salvage	rs143107308	C	T	0.528212	6.67799e-06	0.0750211	0.0166577	7738	0.00261441	20.2781
GCST90027528	PWY.1269..CMP.3.deoxy.D.manno.octulosonate.biosynthesis.I	rs2339975	C	G	0.580122	4.60103e-06	-0.074864	0.016338	7738	0.0027061	20.9912
GCST90027528	PWY.1269..CMP.3.deoxy.D.manno.octulosonate.biosynthesis.I	rs1346730	G	T	0.582161	2.46123e-06	-0.0775693	0.0164645	7738	0.0028603	22.1908
GCST90027528	PWY.1269..CMP.3.deoxy.D.manno.octulosonate.biosynthesis.I	rs505710	G	C	0.766761	9.6242e-06	0.0851199	0.0192342	7738	0.00252457	19.5795
GCST90027528	PWY.1269..CMP.3.deoxy.D.manno.octulosonate.biosynthesis.I	rs963497	C	T	0.282733	4.31527e-06	0.0838326	0.018242	7738	0.00272189	21.114
GCST90027528	PWY.1269..CMP.3.deoxy.D.manno.octulosonate.biosynthesis.I	rs880610	A	G	0.138044	7.90298e-06	-0.104565	0.0234042	7738	0.002573	19.956
GCST90027528	PWY.1269..CMP.3.deoxy.D.manno.octulosonate.biosynthesis.I	rs11638057	A	T	0.384199	7.39665e-06	-0.0744852	0.016619	7738	0.00258927	20.0826
GCST90027528	PWY.1269..CMP.3.deoxy.D.manno.octulosonate.biosynthesis.I	rs72626602	T	C	0.10203	2.28992e-07	0.140128	0.0270826	7738	0.00344781	26.7646
GCST90027529	PWY.2941..L.lysine.biosynthesis.II	rs7716011	G	T	0.249325	6.79416e-07	0.0924444	0.0186111	7738	0.00317837	24.6663
GCST90027529	PWY.2941..L.lysine.biosynthesis.II	rs9396681	T	C	0.896325	1.48517e-06	0.139791	0.029043	7738	0.002985	23.1611
GCST90027529	PWY.2941..L.lysine.biosynthesis.II	rs6416172	T	C	0.287319	6.8259e-06	-0.0807092	0.0179392	7738	0.00260902	20.2362
GCST90027529	PWY.2941..L.lysine.biosynthesis.II	rs1783596	T	C	0.554655	6.21347e-06	0.0730932	0.0161747	7738	0.00263214	20.416
GCST90027529	PWY.2941..L.lysine.biosynthesis.II	rs11617625	A	G	0.105428	8.74976e-06	-0.117501	0.0264286	7738	0.00254798	19.7615
GCST90027529	PWY.2941..L.lysine.biosynthesis.II	rs1559831	A	G	0.940665	6.96286e-06	0.156585	0.0348368	7738	0.00260414	20.1982
GCST90027529	PWY.2941..L.lysine.biosynthesis.II	rs4784500	T	G	0.794729	1.75857e-06	-0.103016	0.0215544	7738	0.00294327	22.8363
GCST90027530	PWY.2942..L.lysine.biosynthesis.III	rs10874012	G	C	0.177507	1.61501e-06	0.101719	0.0212072	7738	0.0029643	23
GCST90027530	PWY.2942..L.lysine.biosynthesis.III	rs2030972	A	G	0.40627	5.45688e-06	-0.0743306	0.0163493	7738	0.0026641	20.6645
GCST90027530	PWY.2942..L.lysine.biosynthesis.III	rs4939301	T	C	0.555692	2.46481e-07	-0.0865563	0.0167733	7738	0.00342956	26.6224
GCST90027530	PWY.2942..L.lysine.biosynthesis.III	rs7242421	C	T	0.315865	2.00645e-07	-0.0950062	0.0182749	7738	0.00348059	27.0199
GCST90027530	PWY.2942..L.lysine.biosynthesis.III	rs2822624	G	A	0.581713	2.37076e-07	0.0854587	0.0165373	7738	0.00343921	26.6975
GCST90027531	PWY.3001..superpathway.of.L.isoleucine.biosynthesis.I	rs138449099	C	A	0.0705568	1.60966e-06	-0.158697	0.0330818	7738	0.00296512	23.0064
GCST90027531	PWY.3001..superpathway.of.L.isoleucine.biosynthesis.I	rs875896	A	C	0.76106	2.24476e-06	0.0896551	0.0189544	7738	0.00288302	22.3675
GCST90027531	PWY.3001..superpathway.of.L.isoleucine.biosynthesis.I	rs7899564	A	G	0.929969	1.04059e-06	-0.155414	0.0318224	7738	0.00307292	23.8454
GCST90027531	PWY.3001..superpathway.of.L.isoleucine.biosynthesis.I	rs11630219	G	C	0.405623	6.27475e-06	-0.0748087	0.0165619	7738	0.00262973	20.3972
GCST90027531	PWY.3001..superpathway.of.L.isoleucine.biosynthesis.I	rs28733370	G	C	0.192839	7.44734e-06	0.0912532	0.0203668	7738	0.00258759	20.0696
GCST90027531	PWY.3001..superpathway.of.L.isoleucine.biosynthesis.I	rs2107539	T	C	0.243451	1.29222e-06	-0.105223	0.0217361	7738	0.00301939	23.4287
GCST90027531	PWY.3001..superpathway.of.L.isoleucine.biosynthesis.I	rs62228654	C	G	0.0668159	4.80425e-07	-0.169803	0.0337315	7738	0.00326417	25.3343
GCST90027532	PWY.3781..aerobic.respiration.I..cytochrome.c.	rs196364	G	A	0.357856	1.71818e-07	-0.175505	0.0335734	7738	0.00351907	27.3197
GCST90027532	PWY.3781..aerobic.respiration.I..cytochrome.c.	rs6940694	A	G	0.050385	6.02358e-07	-0.394297	0.0790102	7738	0.00320817	24.8982
GCST90027533	PWY.4242..pantothenate.and.coenzyme.A.biosynthesis.III	rs6425766	A	G	0.481903	6.15558e-06	0.072575	0.016053	7738	0.00263445	20.4339
GCST90027533	PWY.4242..pantothenate.and.coenzyme.A.biosynthesis.III	rs10493855	C	A	0.114882	6.81129e-06	-0.115641	0.0257008	7738	0.00260955	20.2403
GCST90027533	PWY.4242..pantothenate.and.coenzyme.A.biosynthesis.III	rs734224	T	G	0.162338	2.61576e-06	-0.104059	0.0221454	7738	0.00284528	22.0739
GCST90027533	PWY.4242..pantothenate.and.coenzyme.A.biosynthesis.III	rs13142904	T	C	0.0600325	4.69403e-07	-0.179214	0.0355695	7738	0.00326992	25.3791
GCST90027533	PWY.4242..pantothenate.and.coenzyme.A.biosynthesis.III	rs62483577	C	A	0.658251	8.8852e-06	-0.0768044	0.0172879	7738	0.0025442	19.7322
GCST90027533	PWY.4242..pantothenate.and.coenzyme.A.biosynthesis.III	rs11012848	T	C	0.311378	7.68041e-06	-0.077322	0.0172829	7738	0.00258002	20.0106
GCST90027533	PWY.4242..pantothenate.and.coenzyme.A.biosynthesis.III	rs78983051	G	A	0.10593	3.31005e-06	0.125465	0.0269784	7738	0.00278723	21.6223
GCST90027533	PWY.4242..pantothenate.and.coenzyme.A.biosynthesis.III	rs10831658	A	G	0.207313	1.62399e-06	-0.0955848	0.0199329	7738	0.00296293	22.9893
GCST90027533	PWY.4242..pantothenate.and.coenzyme.A.biosynthesis.III	rs286908	A	G	0.293175	1.99827e-06	-0.0828651	0.0174321	7738	0.00291172	22.5909
GCST90027533	PWY.4242..pantothenate.and.coenzyme.A.biosynthesis.III	rs2187564	A	C	0.416147	3.40413e-06	-0.0749433	0.0161349	7738	0.00278032	21.5686
GCST90027533	PWY.4242..pantothenate.and.coenzyme.A.biosynthesis.III	rs9599845	C	T	0.237486	5.26871e-06	0.0920387	0.0202114	7738	0.00267273	20.7317
GCST90027533	PWY.4242..pantothenate.and.coenzyme.A.biosynthesis.III	rs235996	A	G	0.145756	5.19478e-06	-0.102719	0.0225421	7738	0.00267621	20.7587
GCST90027533	PWY.4242..pantothenate.and.coenzyme.A.biosynthesis.III	rs371346	G	A	0.280494	3.32635e-06	-0.0823282	0.0177066	7738	0.00278602	21.6129
GCST90027533	PWY.4242..pantothenate.and.coenzyme.A.biosynthesis.III	rs7251031	G	T	0.308299	3.4135e-07	-0.0883793	0.0173325	7738	0.00334884	25.9937
GCST90027534	PWY.4984..urea.cycle	rs17530744	C	G	0.217453	9.74917e-06	-0.0919772	0.0207968	7738	0.0025214	19.5549
GCST90027534	PWY.4984..urea.cycle	rs1035394	T	A	0.690265	4.14772e-06	-0.0818655	0.017782	7738	0.00273164	21.1899
GCST90027534	PWY.4984..urea.cycle	rs12113402	T	C	0.279523	5.62628e-06	0.0861076	0.0189666	7738	0.00265657	20.606
GCST90027534	PWY.4984..urea.cycle	rs7825304	T	A	0.465015	4.9852e-06	0.0742678	0.0162675	7738	0.00268635	20.8376
GCST90027534	PWY.4984..urea.cycle	rs3131899	T	C	0.366633	9.36579e-06	0.0763958	0.01724	7738	0.00253126	19.6315
GCST90027534	PWY.4984..urea.cycle	rs7906344	A	G	0.629833	7.79443e-06	-0.0755594	0.0169008	7738	0.0025764	19.9825
GCST90027534	PWY.4984..urea.cycle	rs17772715	C	T	0.722259	9.67447e-06	0.0798891	0.0180568	7738	0.00252329	19.5696
GCST90027534	PWY.4984..urea.cycle	rs11862432	T	C	0.345883	9.79972e-06	0.0808289	0.0182807	7738	0.00252013	19.545
GCST90027534	PWY.4984..urea.cycle	rs79525129	T	C	0.135183	5.9525e-06	0.10894	0.0240589	7738	0.0026427	20.4981
GCST90027534	PWY.4984..urea.cycle	rs2213429	T	C	0.182428	8.15896e-06	-0.0964336	0.0216172	7738	0.00256516	19.8951
GCST90027535	PWY4FS.7..phosphatidylglycerol.biosynthesis.I..plastidic.	rs61775945	T	C	0.0707767	1.89604e-06	0.157204	0.032997	7738	0.00292469	22.6917
GCST90027535	PWY4FS.7..phosphatidylglycerol.biosynthesis.I..plastidic.	rs10913647	C	T	0.0581311	6.83239e-06	-0.155118	0.0344796	7738	0.00260879	20.2344
GCST90027535	PWY4FS.7..phosphatidylglycerol.biosynthesis.I..plastidic.	rs138195517	A	G	0.0684669	3.28376e-06	-0.150044	0.0322521	7738	0.0027892	21.6376
GCST90027535	PWY4FS.7..phosphatidylglycerol.biosynthesis.I..plastidic.	rs9829494	A	T	0.217527	6.51827e-06	0.0895579	0.0198627	7738	0.00262036	20.3244
GCST90027535	PWY4FS.7..phosphatidylglycerol.biosynthesis.I..plastidic.	rs36054004	A	T	0.268377	7.48382e-06	0.0829794	0.0185245	7738	0.00258639	20.0602
GCST90027535	PWY4FS.7..phosphatidylglycerol.biosynthesis.I..plastidic.	rs2112412	C	T	0.832064	7.03134e-06	-0.0979145	0.021794	7738	0.00260173	20.1795
GCST90027535	PWY4FS.7..phosphatidylglycerol.biosynthesis.I..plastidic.	rs9640172	G	A	0.204853	4.16492e-06	0.09425	0.0204759	7738	0.00273062	21.1819
GCST90027535	PWY4FS.7..phosphatidylglycerol.biosynthesis.I..plastidic.	rs6468082	C	G	0.695665	7.69393e-06	-0.0787155	0.0175958	7738	0.00257959	20.0073
GCST90027535	PWY4FS.7..phosphatidylglycerol.biosynthesis.I..plastidic.	rs10093578	A	G	0.0808034	9.14614e-07	-0.153626	0.0312936	7738	0.00310483	24.0937
GCST90027535	PWY4FS.7..phosphatidylglycerol.biosynthesis.I..plastidic.	rs7956970	T	A	0.632831	8.31875e-06	0.0751632	0.0168648	7738	0.00256039	19.858
GCST90027535	PWY4FS.7..phosphatidylglycerol.biosynthesis.I..plastidic.	rs1845684	T	A	0.140983	8.53813e-06	0.103223	0.0231897	7738	0.00255399	19.8083
GCST90027535	PWY4FS.7..phosphatidylglycerol.biosynthesis.I..plastidic.	rs11630392	C	G	0.560299	7.25709e-06	0.0728462	0.0162385	7738	0.00259396	20.119
GCST90027535	PWY4FS.7..phosphatidylglycerol.biosynthesis.I..plastidic.	rs11080532	G	A	0.694008	4.10563e-06	0.0868119	0.0188477	7738	0.00273415	21.2094
GCST90027535	PWY4FS.7..phosphatidylglycerol.biosynthesis.I..plastidic.	rs3907130	T	G	0.372901	9.24658e-06	-0.0755738	0.0170438	7738	0.00253441	19.656
GCST90027535	PWY4FS.7..phosphatidylglycerol.biosynthesis.I..plastidic.	rs4807749	G	A	0.215572	9.08732e-06	0.0873442	0.0196818	7738	0.00253868	19.6892
GCST90027536	PWY.5005..biotin.biosynthesis.II	rs608108	C	T	0.303646	2.20129e-06	0.105095	0.0221999	7738	0.00288784	22.405
GCST90027536	PWY.5005..biotin.biosynthesis.II	rs778115	C	T	0.579362	1.03877e-06	-0.101046	0.0206887	7738	0.00307335	23.8487
GCST90027536	PWY.5005..biotin.biosynthesis.II	rs73852710	G	T	0.0695707	2.94147e-06	-0.187124	0.0400277	7738	0.00281634	21.8487
GCST90027536	PWY.5005..biotin.biosynthesis.II	rs9765093	A	G	0.265378	3.74639e-06	0.109305	0.0236336	7738	0.00275671	21.3849
GCST90027536	PWY.5005..biotin.biosynthesis.II	rs17569415	A	G	0.340946	3.73868e-06	0.0985581	0.021308	7738	0.00275722	21.3888
GCST90027536	PWY.5005..biotin.biosynthesis.II	rs11143787	G	A	0.285638	9.53944e-06	-0.10532	0.0237885	7738	0.00252675	19.5964
GCST90027536	PWY.5005..biotin.biosynthesis.II	rs16908224	G	A	0.230424	5.04242e-06	-0.108766	0.0238363	7738	0.00268354	20.8157
GCST90027536	PWY.5005..biotin.biosynthesis.II	rs9569181	C	T	0.081752	5.77307e-06	-0.169449	0.0373685	7738	0.00265023	20.5567
GCST90027536	PWY.5005..biotin.biosynthesis.II	rs113053719	A	C	0.100986	3.27834e-06	0.158942	0.0341622	7738	0.0027896	21.6407
GCST90027536	PWY.5005..biotin.biosynthesis.II	rs17645023	T	A	0.245424	9.78208e-08	0.125699	0.0235802	7738	0.00365891	28.4093
GCST90027536	PWY.5005..biotin.biosynthesis.II	rs6062355	T	G	0.144955	3.60937e-06	-0.143298	0.0309319	7738	0.0027659	21.4563
GCST90027537	PWY.5022..4.aminobutanoate.degradation.V	rs35986566	G	A	0.386074	8.10393e-06	0.0824125	0.0184681	7738	0.00256682	19.908
GCST90027537	PWY.5022..4.aminobutanoate.degradation.V	rs2239926	C	G	0.276888	1.15081e-06	0.0965996	0.0198604	7738	0.00304803	23.6516
GCST90027537	PWY.5022..4.aminobutanoate.degradation.V	rs117829634	G	A	0.0747059	1.43624e-06	-0.174867	0.0362802	7738	0.00299328	23.2255
GCST90027537	PWY.5022..4.aminobutanoate.degradation.V	rs2948520	T	C	0.501949	8.95353e-06	0.0801306	0.0180433	7738	0.00254232	19.7175
GCST90027537	PWY.5022..4.aminobutanoate.degradation.V	rs6105464	A	C	0.323442	6.85927e-06	-0.0847624	0.0188444	7738	0.00260782	20.2269
GCST90027538	PWY.5088..L.glutamate.degradation.VIII..to.propanoate.	rs12028490	T	C	0.0871635	4.73974e-06	-0.274747	0.0600411	7738	0.00269878	20.9343
GCST90027538	PWY.5088..L.glutamate.degradation.VIII..to.propanoate.	rs6438382	A	G	0.492623	5.1776e-06	-0.161494	0.035435	7738	0.00267703	20.7651
GCST90027538	PWY.5088..L.glutamate.degradation.VIII..to.propanoate.	rs11732315	A	G	0.0608812	1.00745e-06	0.346719	0.0709011	7738	0.00308092	23.9077
GCST90027538	PWY.5088..L.glutamate.degradation.VIII..to.propanoate.	rs2127754	A	G	0.368415	4.83241e-06	-0.161332	0.0352874	7738	0.00269401	20.8972
GCST90027538	PWY.5088..L.glutamate.degradation.VIII..to.propanoate.	rs77267984	T	C	0.0771424	7.55041e-06	-0.302329	0.0675211	7738	0.00258421	20.0433
GCST90027538	PWY.5088..L.glutamate.degradation.VIII..to.propanoate.	rs675403	G	A	0.253467	6.63133e-06	0.174413	0.0387138	7738	0.00261613	20.2915
GCST90027538	PWY.5088..L.glutamate.degradation.VIII..to.propanoate.	rs9927590	T	C	0.0843884	9.27824e-09	-0.339265	0.0590702	7738	0.00424488	32.9784
GCST90027538	PWY.5088..L.glutamate.degradation.VIII..to.propanoate.	rs4507010	G	A	0.724424	8.34866e-06	0.177948	0.0399342	7738	0.00255951	19.8512
GCST90027539	PWY.5097..L.lysine.biosynthesis.VI	rs10874012	G	C	0.177507	2.54952e-06	0.0997826	0.0212117	7738	0.00285161	22.1231
GCST90027539	PWY.5097..L.lysine.biosynthesis.VI	rs7557745	C	T	0.930722	3.76518e-06	-0.148732	0.0321656	7738	0.00275548	21.3753
GCST90027539	PWY.5097..L.lysine.biosynthesis.VI	rs289852	C	G	0.37541	8.62248e-06	-0.0741851	0.0166741	7738	0.00255158	19.7895
GCST90027539	PWY.5097..L.lysine.biosynthesis.VI	rs111440229	G	A	0.0553672	8.55318e-06	-0.162824	0.0365826	7738	0.00255356	19.8049
GCST90027539	PWY.5097..L.lysine.biosynthesis.VI	rs6873153	T	C	0.211044	6.12503e-06	-0.0897738	0.0198525	7738	0.00263567	20.4434
GCST90027539	PWY.5097..L.lysine.biosynthesis.VI	rs6882828	T	G	0.178837	6.64789e-06	0.0951708	0.0211272	7738	0.00261552	20.2867
GCST90027539	PWY.5097..L.lysine.biosynthesis.VI	rs3734447	G	T	0.597407	4.31754e-06	-0.0755862	0.016448	7738	0.00272176	21.113
GCST90027539	PWY.5097..L.lysine.biosynthesis.VI	rs56166050	T	C	0.194657	3.73957e-06	0.101884	0.0220272	7738	0.00275716	21.3884
GCST90027539	PWY.5097..L.lysine.biosynthesis.VI	rs1962815	A	G	0.382817	4.24875e-06	0.0771051	0.0167663	7738	0.00272571	21.1437
GCST90027539	PWY.5097..L.lysine.biosynthesis.VI	rs805719	A	G	0.827742	9.69365e-06	-0.0969086	0.0219057	7738	0.00252281	19.5658
GCST90027539	PWY.5097..L.lysine.biosynthesis.VI	rs4939301	T	C	0.555692	6.75906e-07	-0.0833505	0.0167769	7738	0.00317965	24.6763
GCST90027539	PWY.5097..L.lysine.biosynthesis.VI	rs10748397	G	T	0.758401	9.74796e-06	0.0837637	0.0189395	7738	0.00252144	19.5551
GCST90027539	PWY.5097..L.lysine.biosynthesis.VI	rs76301358	A	G	0.171596	7.74903e-06	0.0962915	0.0215321	7738	0.00257783	19.9936
GCST90027539	PWY.5097..L.lysine.biosynthesis.VI	rs754639	A	G	0.33023	5.0476e-07	0.092514	0.0184126	7738	0.00325193	25.239
GCST90027539	PWY.5097..L.lysine.biosynthesis.VI	rs7242421	C	T	0.315865	2.8434e-06	-0.0855779	0.0182788	7738	0.0028247	21.9138
GCST90027539	PWY.5097..L.lysine.biosynthesis.VI	rs2822654	C	A	0.498252	1.69323e-07	0.0851494	0.0162803	7738	0.0035227	27.348
GCST90027540	PWY.5100..pyruvate.fermentation.to.acetate.and.lactate.II	rs602386	G	C	0.18448	5.98351e-06	-0.0971919	0.0214695	7738	0.00264142	20.4882
GCST90027540	PWY.5100..pyruvate.fermentation.to.acetate.and.lactate.II	rs75331157	G	C	0.057573	8.72347e-06	0.159162	0.035794	7738	0.00254872	19.7673
GCST90027540	PWY.5100..pyruvate.fermentation.to.acetate.and.lactate.II	rs12128621	A	T	0.50452	5.16652e-07	-0.0825138	0.0164369	7738	0.00324617	25.1941
GCST90027540	PWY.5100..pyruvate.fermentation.to.acetate.and.lactate.II	rs7595525	C	A	0.200693	7.71529e-06	-0.0912273	0.0203954	7738	0.0025789	20.002
GCST90027540	PWY.5100..pyruvate.fermentation.to.acetate.and.lactate.II	rs4533457	G	T	0.813065	6.59854e-06	0.0949563	0.0210722	7738	0.00261735	20.301
GCST90027540	PWY.5100..pyruvate.fermentation.to.acetate.and.lactate.II	rs2624881	C	T	0.0879416	6.24599e-06	0.128454	0.0284322	7738	0.00263086	20.406
GCST90027540	PWY.5100..pyruvate.fermentation.to.acetate.and.lactate.II	rs11249616	A	G	0.219036	2.638e-06	-0.0960622	0.0204511	7738	0.00284319	22.0576
GCST90027540	PWY.5100..pyruvate.fermentation.to.acetate.and.lactate.II	rs3812328	A	G	0.347247	6.25483e-06	-0.0772099	0.017091	7738	0.00263051	20.4033
GCST90027540	PWY.5100..pyruvate.fermentation.to.acetate.and.lactate.II	rs80315336	A	G	0.0654592	7.68309e-06	0.156289	0.034934	7738	0.00257993	20.01
GCST90027540	PWY.5100..pyruvate.fermentation.to.acetate.and.lactate.II	rs117996720	A	C	0.0608325	5.33263e-06	-0.167688	0.0368444	7738	0.00266976	20.7086
GCST90027540	PWY.5100..pyruvate.fermentation.to.acetate.and.lactate.II	rs12280724	T	G	0.0762468	6.34824e-06	-0.137533	0.0304651	7738	0.00262687	20.375
GCST90027540	PWY.5100..pyruvate.fermentation.to.acetate.and.lactate.II	rs9954361	A	T	0.195492	7.72075e-06	0.0961991	0.0215077	7738	0.00257873	20.0006
GCST90027540	PWY.5100..pyruvate.fermentation.to.acetate.and.lactate.II	rs1187244	C	T	0.304888	1.07657e-06	-0.0863736	0.01771	7738	0.00306451	23.7799
GCST90027540	PWY.5100..pyruvate.fermentation.to.acetate.and.lactate.II	rs4816116	G	A	0.127913	5.72988e-06	-0.113439	0.0250079	7738	0.00265208	20.5711
GCST90027541	PWY.5101..L.isoleucine.biosynthesis.II	rs17793651	T	C	0.0526319	3.76431e-06	-0.173607	0.0375448	7738	0.00275554	21.3757
GCST90027541	PWY.5101..L.isoleucine.biosynthesis.II	rs57592260	T	G	0.287597	9.37253e-07	-0.0899785	0.0183466	7738	0.00309878	24.0467
GCST90027541	PWY.5101..L.isoleucine.biosynthesis.II	rs10015335	A	T	0.338509	5.33281e-06	-0.079337	0.0174319	7738	0.00266976	20.7085
GCST90027541	PWY.5101..L.isoleucine.biosynthesis.II	rs67560429	G	A	0.333713	8.88491e-06	0.0776669	0.017482	7738	0.00254421	19.7322
GCST90027541	PWY.5101..L.isoleucine.biosynthesis.II	rs12189770	G	A	0.258698	9.65621e-06	-0.0917168	0.0207282	7738	0.00252376	19.5732
GCST90027541	PWY.5101..L.isoleucine.biosynthesis.II	rs4744061	A	G	0.176991	3.69052e-06	-0.0994209	0.021482	7738	0.00276042	21.4137
GCST90027541	PWY.5101..L.isoleucine.biosynthesis.II	rs680138	T	C	0.617861	6.71094e-06	-0.0767407	0.0170434	7738	0.0026132	20.2687
GCST90027541	PWY.5101..L.isoleucine.biosynthesis.II	rs34025630	T	C	0.182399	3.1866e-06	-0.100746	0.0216268	7738	0.0027966	21.6952
GCST90027541	PWY.5101..L.isoleucine.biosynthesis.II	rs2596115	G	A	0.797058	7.96376e-06	0.0912775	0.0204376	7738	0.00257111	19.9414
GCST90027541	PWY.5101..L.isoleucine.biosynthesis.II	rs116856824	T	G	0.0546963	5.33296e-06	-0.171955	0.037782	7738	0.00266975	20.7085
GCST90027541	PWY.5101..L.isoleucine.biosynthesis.II	rs28513874	G	A	0.37101	5.10722e-07	-0.0852611	0.0169767	7738	0.00324902	25.2164
GCST90027541	PWY.5101..L.isoleucine.biosynthesis.II	rs4798876	A	G	0.468011	3.56681e-06	-0.0777825	0.016781	7738	0.00276882	21.479
GCST90027541	PWY.5101..L.isoleucine.biosynthesis.II	rs9304309	G	A	0.252999	5.52575e-06	0.0871492	0.0191799	7738	0.00266101	20.6405
GCST90027542	PWY.5104..L.isoleucine.biosynthesis.IV	rs17042641	C	G	0.251995	1.73974e-06	-0.0893593	0.0186885	7738	0.00294593	22.857
GCST90027542	PWY.5104..L.isoleucine.biosynthesis.IV	rs111831915	A	G	0.091669	9.50428e-06	0.127343	0.0287575	7738	0.00252765	19.6035
GCST90027542	PWY.5104..L.isoleucine.biosynthesis.IV	rs153114	C	T	0.271122	1.48685e-06	-0.0876991	0.0182213	7738	0.00298472	23.1589
GCST90027542	PWY.5104..L.isoleucine.biosynthesis.IV	rs10810562	C	T	0.857462	2.36024e-07	-0.119688	0.0231575	7738	0.00344031	26.7061
GCST90027542	PWY.5104..L.isoleucine.biosynthesis.IV	rs1904729	A	G	0.596126	3.5148e-06	0.0773397	0.0166746	7738	0.00277244	21.5072
GCST90027542	PWY.5104..L.isoleucine.biosynthesis.IV	rs1887496	G	A	0.406246	4.26368e-06	-0.0749804	0.0163068	7738	0.00272485	21.137
GCST90027542	PWY.5104..L.isoleucine.biosynthesis.IV	rs77090789	C	T	0.110354	2.12469e-06	-0.122242	0.0257831	7738	0.00289658	22.473
GCST90027542	PWY.5104..L.isoleucine.biosynthesis.IV	rs1997943	A	G	0.245532	4.60938e-06	0.0858536	0.0187379	7738	0.00270565	20.9877
GCST90027542	PWY.5104..L.isoleucine.biosynthesis.IV	rs76878083	T	C	0.0879141	5.82282e-06	0.139461	0.0307677	7738	0.00264812	20.5403
GCST90027543	PWY.5121..superpathway.of.geranylgeranyl.diphosphate.biosynthesis.II..via.MEP.	rs3010318	G	T	0.856341	9.92999e-07	0.12472	0.0254893	7738	0.00308449	23.9355
GCST90027543	PWY.5121..superpathway.of.geranylgeranyl.diphosphate.biosynthesis.II..via.MEP.	rs12468621	G	C	0.0778536	6.90662e-06	-0.156225	0.0347432	7738	0.00260613	20.2137
GCST90027543	PWY.5121..superpathway.of.geranylgeranyl.diphosphate.biosynthesis.II..via.MEP.	rs12477233	A	G	0.0953506	1.94118e-06	0.172524	0.0362487	7738	0.00291888	22.6465
GCST90027543	PWY.5121..superpathway.of.geranylgeranyl.diphosphate.biosynthesis.II..via.MEP.	rs34280534	C	G	0.195189	2.67644e-06	0.10559	0.0224937	7738	0.00283962	22.0299
GCST90027543	PWY.5121..superpathway.of.geranylgeranyl.diphosphate.biosynthesis.II..via.MEP.	rs11708774	G	A	0.370633	2.96987e-06	-0.0874978	0.0187245	7738	0.00281397	21.8303
GCST90027543	PWY.5121..superpathway.of.geranylgeranyl.diphosphate.biosynthesis.II..via.MEP.	rs6872950	T	C	0.787312	8.26676e-06	0.0967609	0.0217042	7738	0.00256193	19.87
GCST90027543	PWY.5121..superpathway.of.geranylgeranyl.diphosphate.biosynthesis.II..via.MEP.	rs1348	C	T	0.198638	3.58214e-06	-0.103083	0.0222436	7738	0.00276776	21.4708
GCST90027543	PWY.5121..superpathway.of.geranylgeranyl.diphosphate.biosynthesis.II..via.MEP.	rs7768092	C	T	0.0753044	4.04647e-06	0.168872	0.0366397	7738	0.00273773	21.2372
GCST90027543	PWY.5121..superpathway.of.geranylgeranyl.diphosphate.biosynthesis.II..via.MEP.	rs73223276	A	C	0.076636	6.6418e-06	0.16298	0.0361788	7738	0.00261575	20.2885
GCST90027543	PWY.5121..superpathway.of.geranylgeranyl.diphosphate.biosynthesis.II..via.MEP.	rs34880012	C	T	0.0974342	5.35598e-07	-0.168228	0.0335577	7738	0.00323725	25.1247
GCST90027543	PWY.5121..superpathway.of.geranylgeranyl.diphosphate.biosynthesis.II..via.MEP.	rs324546	G	A	0.623757	2.90347e-06	-0.0869535	0.0185896	7738	0.00281954	21.8737
GCST90027543	PWY.5121..superpathway.of.geranylgeranyl.diphosphate.biosynthesis.II..via.MEP.	rs10786832	T	C	0.372798	4.76965e-06	0.085438	0.0186763	7738	0.00269723	20.9222
GCST90027543	PWY.5121..superpathway.of.geranylgeranyl.diphosphate.biosynthesis.II..via.MEP.	rs118145836	A	G	0.125925	4.51664e-06	-0.128246	0.0279642	7738	0.00271065	21.0266
GCST90027544	PWY.5173..superpathway.of.acetyl.CoA.biosynthesis	rs57556486	C	A	0.100193	6.7778e-06	-0.166228	0.0369351	7738	0.00261076	20.2497
GCST90027544	PWY.5173..superpathway.of.acetyl.CoA.biosynthesis	rs72802218	C	A	0.276743	5.69789e-06	0.110332	0.0243166	7738	0.00265346	20.5818
GCST90027544	PWY.5173..superpathway.of.acetyl.CoA.biosynthesis	rs11684212	T	C	0.0510055	4.08617e-06	-0.233394	0.0506614	7738	0.00273532	21.2185
GCST90027544	PWY.5173..superpathway.of.acetyl.CoA.biosynthesis	rs78721974	G	C	0.0762398	5.94649e-06	0.194905	0.0430417	7738	0.00264295	20.5
GCST90027544	PWY.5173..superpathway.of.acetyl.CoA.biosynthesis	rs10433369	A	T	0.212694	2.67211e-06	-0.127888	0.0272418	7738	0.00284002	22.033
GCST90027544	PWY.5173..superpathway.of.acetyl.CoA.biosynthesis	rs56349005	T	C	0.193825	7.99596e-06	-0.125349	0.0280718	7738	0.00257012	19.9337
GCST90027544	PWY.5173..superpathway.of.acetyl.CoA.biosynthesis	rs16880922	T	C	0.0949568	9.20121e-06	0.169769	0.0382782	7738	0.00253562	19.6654
GCST90027544	PWY.5173..superpathway.of.acetyl.CoA.biosynthesis	rs9649791	T	C	0.0951246	7.33424e-06	0.170452	0.0380155	7738	0.00259136	20.0988
GCST90027544	PWY.5173..superpathway.of.acetyl.CoA.biosynthesis	rs72497321	G	A	0.104649	7.45233e-06	-0.163914	0.0365851	7738	0.00258743	20.0683
GCST90027544	PWY.5173..superpathway.of.acetyl.CoA.biosynthesis	rs9969725	G	A	0.0970736	4.0043e-07	-0.195776	0.0386241	7738	0.00330928	25.6856
GCST90027544	PWY.5173..superpathway.of.acetyl.CoA.biosynthesis	rs4442602	C	T	0.67759	8.49599e-06	-0.109588	0.0246138	7738	0.00255521	19.8177
GCST90027544	PWY.5173..superpathway.of.acetyl.CoA.biosynthesis	rs9965721	C	A	0.57824	3.46521e-06	-0.11424	0.0246148	7738	0.00277594	21.5345
GCST90027544	PWY.5173..superpathway.of.acetyl.CoA.biosynthesis	rs8108922	T	C	0.557354	1.70777e-06	-0.105907	0.022132	7738	0.00295051	22.8927
GCST90027545	PWY.5177..glutaryl.CoA.degradation	rs6705904	G	T	0.607313	2.40008e-06	0.0777489	0.0164847	7738	0.00286651	22.239
GCST90027545	PWY.5177..glutaryl.CoA.degradation	rs6771585	T	C	0.268426	8.5684e-06	-0.0828843	0.0186237	7738	0.00255313	19.8015
GCST90027545	PWY.5177..glutaryl.CoA.degradation	rs73035953	A	G	0.182476	8.76432e-06	-0.0938675	0.0211146	7738	0.00254757	19.7583
GCST90027545	PWY.5177..glutaryl.CoA.degradation	rs2467707	C	T	0.890111	3.20157e-06	0.119244	0.0256029	7738	0.00279545	21.6862
GCST90027545	PWY.5177..glutaryl.CoA.degradation	rs2769148	A	T	0.0847084	2.54412e-06	-0.137397	0.0292051	7738	0.00285213	22.1272
GCST90027545	PWY.5177..glutaryl.CoA.degradation	rs34436485	G	T	0.22915	8.63746e-06	-0.0863431	0.0194084	7738	0.00255115	19.7862
GCST90027545	PWY.5177..glutaryl.CoA.degradation	rs6504045	G	A	0.265363	4.33247e-06	0.0838954	0.0182589	7738	0.00272091	21.1064
GCST90027545	PWY.5177..glutaryl.CoA.degradation	rs36720	C	T	0.306315	8.57211e-06	-0.078686	0.0176808	7738	0.00255302	19.8007
GCST90027545	PWY.5177..glutaryl.CoA.degradation	rs2746259	A	G	0.621172	7.03751e-06	0.0816556	0.0181758	7738	0.00260151	20.1778
GCST90027546	PWY.5188..tetrapyrrole.biosynthesis.I..from.glutamate.	rs7514177	A	G	0.367239	5.65604e-07	0.0845949	0.0169102	7738	0.00322375	25.0196
GCST90027546	PWY.5188..tetrapyrrole.biosynthesis.I..from.glutamate.	rs56328422	C	T	0.27704	7.36618e-07	0.0920807	0.0185967	7738	0.00315837	24.5105
GCST90027546	PWY.5188..tetrapyrrole.biosynthesis.I..from.glutamate.	rs6883971	A	G	0.500646	3.50777e-06	-0.0747935	0.0161242	7738	0.00277293	21.5111
GCST90027546	PWY.5188..tetrapyrrole.biosynthesis.I..from.glutamate.	rs6955039	A	G	0.0870727	4.59245e-06	0.132395	0.0288909	7738	0.00270655	20.9947
GCST90027546	PWY.5188..tetrapyrrole.biosynthesis.I..from.glutamate.	rs143423622	A	G	0.0773468	9.86718e-07	-0.151561	0.0309671	7738	0.00308606	23.9477
GCST90027546	PWY.5188..tetrapyrrole.biosynthesis.I..from.glutamate.	rs10097925	G	A	0.0903157	5.32991e-06	0.127694	0.0280562	7738	0.00266989	20.7096
GCST90027546	PWY.5188..tetrapyrrole.biosynthesis.I..from.glutamate.	rs72836424	C	T	0.0785636	6.47836e-06	0.134741	0.0298751	7738	0.00262187	20.3361
GCST90027546	PWY.5188..tetrapyrrole.biosynthesis.I..from.glutamate.	rs602124	C	G	0.772156	9.06351e-06	-0.085996	0.0193755	7738	0.00253932	19.6942
GCST90027546	PWY.5188..tetrapyrrole.biosynthesis.I..from.glutamate.	rs4268811	C	A	0.332946	5.86616e-07	0.0874016	0.0174958	7738	0.00321472	24.9493
GCST90027546	PWY.5188..tetrapyrrole.biosynthesis.I..from.glutamate.	rs61086481	A	G	0.210287	9.36662e-06	0.0879345	0.019844	7738	0.00253124	19.6314
GCST90027546	PWY.5188..tetrapyrrole.biosynthesis.I..from.glutamate.	rs4810354	A	G	0.727515	6.77569e-07	-0.093531	0.0188279	7738	0.00317904	24.6715
GCST90027547	PWY.5189..tetrapyrrole.biosynthesis.II..from.glycine.	rs78900653	G	A	0.0626405	5.06126e-06	-0.186456	0.0408695	7738	0.00268262	20.8086
GCST90027547	PWY.5189..tetrapyrrole.biosynthesis.II..from.glycine.	rs497333	G	T	0.668849	7.07417e-06	-0.100133	0.0222943	7738	0.00260024	20.1679
GCST90027547	PWY.5189..tetrapyrrole.biosynthesis.II..from.glycine.	rs11164337	T	C	0.335786	1.13463e-06	-0.103145	0.0211939	7738	0.00305153	23.6789
GCST90027547	PWY.5189..tetrapyrrole.biosynthesis.II..from.glycine.	rs1408826	C	G	0.532828	8.78088e-07	0.0991627	0.0201667	7738	0.00311491	24.1722
GCST90027547	PWY.5189..tetrapyrrole.biosynthesis.II..from.glycine.	rs9999134	A	T	0.413889	9.39888e-06	-0.0906156	0.0204524	7738	0.00253039	19.6248
GCST90027547	PWY.5189..tetrapyrrole.biosynthesis.II..from.glycine.	rs9394084	A	G	0.249958	6.30736e-06	-0.112177	0.0248409	7738	0.00262846	20.3873
GCST90027547	PWY.5189..tetrapyrrole.biosynthesis.II..from.glycine.	rs4291387	A	G	0.326343	6.8466e-06	0.0960681	0.021356	7738	0.00260828	20.2304
GCST90027547	PWY.5189..tetrapyrrole.biosynthesis.II..from.glycine.	rs11601607	T	G	0.0739059	4.88879e-06	-0.177624	0.0388716	7738	0.00269116	20.875
GCST90027547	PWY.5189..tetrapyrrole.biosynthesis.II..from.glycine.	rs17181375	A	G	0.0764906	7.98645e-06	0.170862	0.0382622	7738	0.00257041	19.936
GCST90027547	PWY.5189..tetrapyrrole.biosynthesis.II..from.glycine.	rs4930770	T	C	0.245025	6.30997e-06	0.105489	0.0233603	7738	0.00262835	20.3865
GCST90027547	PWY.5189..tetrapyrrole.biosynthesis.II..from.glycine.	rs2695011	T	C	0.935027	6.39029e-06	0.20264	0.044901	7738	0.00262524	20.3623
GCST90027547	PWY.5189..tetrapyrrole.biosynthesis.II..from.glycine.	rs1696430	A	G	0.0698958	8.13257e-06	-0.1744	0.0390885	7738	0.00256596	19.9013
GCST90027547	PWY.5189..tetrapyrrole.biosynthesis.II..from.glycine.	rs1437589	C	G	0.475967	1.92961e-06	-0.0966287	0.0202973	7738	0.00292035	22.658
GCST90027547	PWY.5189..tetrapyrrole.biosynthesis.II..from.glycine.	rs28645782	C	T	0.741605	4.39011e-06	0.107058	0.0233139	7738	0.00271765	21.081
GCST90027548	PWY.5345..superpathway.of.L.methionine.biosynthesis..by.sulfhydrylation.	rs55974538	A	G	0.117807	8.57238e-06	-0.11291	0.025371	7738	0.00255301	19.8006
GCST90027548	PWY.5345..superpathway.of.L.methionine.biosynthesis..by.sulfhydrylation.	rs2305588	C	T	0.200682	1.59255e-06	-0.0980614	0.0204326	7738	0.00296776	23.0269
GCST90027548	PWY.5345..superpathway.of.L.methionine.biosynthesis..by.sulfhydrylation.	rs34153461	C	A	0.457711	9.52166e-06	0.0759731	0.0171584	7738	0.00252721	19.6
GCST90027548	PWY.5345..superpathway.of.L.methionine.biosynthesis..by.sulfhydrylation.	rs12541554	A	G	0.342803	2.29965e-06	-0.0806005	0.0170578	7738	0.00287705	22.3211
GCST90027548	PWY.5345..superpathway.of.L.methionine.biosynthesis..by.sulfhydrylation.	rs11631625	G	A	0.241789	6.47073e-06	-0.0861176	0.0190931	7738	0.00262216	20.3384
GCST90027548	PWY.5345..superpathway.of.L.methionine.biosynthesis..by.sulfhydrylation.	rs12442423	C	A	0.168002	9.65536e-06	-0.0975472	0.0220458	7738	0.00252378	19.5734
GCST90027548	PWY.5345..superpathway.of.L.methionine.biosynthesis..by.sulfhydrylation.	rs77586457	A	G	0.0567096	1.4039e-06	0.175786	0.0364365	7738	0.0029989	23.2693
GCST90027548	PWY.5345..superpathway.of.L.methionine.biosynthesis..by.sulfhydrylation.	rs36095827	T	G	0.52524	8.88323e-08	0.0875099	0.0163625	7738	0.00368285	28.5959
GCST90027548	PWY.5345..superpathway.of.L.methionine.biosynthesis..by.sulfhydrylation.	rs77995790	C	T	0.0617925	4.24401e-06	-0.158003	0.0343555	7738	0.00272599	21.1459
GCST90027548	PWY.5345..superpathway.of.L.methionine.biosynthesis..by.sulfhydrylation.	rs73009442	A	C	0.287204	3.28181e-06	0.0928574	0.0199593	7738	0.00278934	21.6387
GCST90027549	PWY.5384..sucrose.degradation.IV..sucrose.phosphorylase.	rs469926	C	T	0.582726	7.15438e-06	-0.0936989	0.0208728	7738	0.00259746	20.1463
GCST90027549	PWY.5384..sucrose.degradation.IV..sucrose.phosphorylase.	rs1641129	T	G	0.0583257	5.66453e-06	-0.204992	0.045167	7738	0.0026549	20.593
GCST90027549	PWY.5384..sucrose.degradation.IV..sucrose.phosphorylase.	rs6794521	C	T	0.545526	2.53537e-06	0.0956983	0.0203386	7738	0.00285298	22.1338
GCST90027549	PWY.5384..sucrose.degradation.IV..sucrose.phosphorylase.	rs12646654	C	T	0.315164	9.85011e-06	-0.0955337	0.0216118	7738	0.00251887	19.5352
GCST90027549	PWY.5384..sucrose.degradation.IV..sucrose.phosphorylase.	rs140865787	T	C	0.0548948	2.25982e-06	0.211017	0.0446248	7738	0.00288137	22.3547
GCST90027549	PWY.5384..sucrose.degradation.IV..sucrose.phosphorylase.	rs2962259	C	T	0.799817	1.5466e-06	0.122254	0.0254425	7738	0.00297499	23.0832
GCST90027549	PWY.5384..sucrose.degradation.IV..sucrose.phosphorylase.	rs9386212	T	G	0.590529	5.52629e-06	0.0947158	0.0208453	7738	0.00266099	20.6403
GCST90027549	PWY.5384..sucrose.degradation.IV..sucrose.phosphorylase.	rs2690294	G	C	0.450437	6.87542e-06	-0.0945844	0.0210304	7738	0.00260724	20.2224
GCST90027549	PWY.5384..sucrose.degradation.IV..sucrose.phosphorylase.	rs10450895	T	C	0.417494	4.28136e-06	-0.0956152	0.0207984	7738	0.00272383	21.1291
GCST90027550	PWY.5505..L.glutamate.and.L.glutamine.biosynthesis	rs17029909	G	A	0.234966	2.99557e-06	-0.109856	0.023518	7738	0.00281184	21.8138
GCST90027550	PWY.5505..L.glutamate.and.L.glutamine.biosynthesis	rs1323288	G	T	0.264833	6.64585e-06	-0.104898	0.0232863	7738	0.0026156	20.2873
GCST90027550	PWY.5505..L.glutamate.and.L.glutamine.biosynthesis	rs13407420	A	C	0.463935	7.10923e-06	0.0901004	0.0200652	7738	0.00259902	20.1584
GCST90027550	PWY.5505..L.glutamate.and.L.glutamine.biosynthesis	rs78559400	T	C	0.0569253	1.9794e-06	0.229021	0.0481591	7738	0.00291406	22.6091
GCST90027550	PWY.5505..L.glutamate.and.L.glutamine.biosynthesis	rs76063194	T	G	0.0928905	1.52561e-06	0.16236	0.0337697	7738	0.00297836	23.1095
GCST90027550	PWY.5505..L.glutamate.and.L.glutamine.biosynthesis	rs32064	T	C	0.465387	2.23926e-06	0.0953215	0.0201502	7738	0.00288362	22.3722
GCST90027550	PWY.5505..L.glutamate.and.L.glutamine.biosynthesis	rs1265156	A	C	0.311627	5.12264e-06	-0.0977303	0.0214335	7738	0.00267965	20.7855
GCST90027550	PWY.5505..L.glutamate.and.L.glutamine.biosynthesis	rs72956316	C	T	0.110632	2.3924e-06	-0.151959	0.0322146	7738	0.0028673	22.2452
GCST90027550	PWY.5505..L.glutamate.and.L.glutamine.biosynthesis	rs11144743	T	C	0.0718881	7.23911e-06	-0.171868	0.0383075	7738	0.00259457	20.1238
GCST90027550	PWY.5505..L.glutamate.and.L.glutamine.biosynthesis	rs77963678	C	T	0.0974272	7.51121e-06	0.15031	0.0335615	7738	0.00258549	20.0532
GCST90027550	PWY.5505..L.glutamate.and.L.glutamine.biosynthesis	rs61311341	G	T	0.100968	4.78004e-06	-0.155422	0.0339779	7738	0.0026967	20.9181
GCST90027550	PWY.5505..L.glutamate.and.L.glutamine.biosynthesis	rs12414617	G	T	0.0745865	3.79173e-07	-0.199019	0.0391838	7738	0.0033228	25.7909
GCST90027550	PWY.5505..L.glutamate.and.L.glutamine.biosynthesis	rs472752	C	A	0.598315	6.67317e-06	0.0930875	0.0206684	7738	0.00261459	20.2795
GCST90027550	PWY.5505..L.glutamate.and.L.glutamine.biosynthesis	rs11027972	G	A	0.0624236	1.98026e-06	-0.202865	0.0426597	7738	0.00291396	22.6083
GCST90027550	PWY.5505..L.glutamate.and.L.glutamine.biosynthesis	rs16934689	G	A	0.125403	1.9845e-06	-0.145495	0.0305982	7738	0.00291343	22.6041
GCST90027550	PWY.5505..L.glutamate.and.L.glutamine.biosynthesis	rs58095618	A	G	0.100818	3.44541e-06	-0.152287	0.0328042	7738	0.00277735	21.5454
GCST90027551	PWY.5656..mannosylglycerate.biosynthesis.I	rs114111279	A	C	0.0785548	2.49949e-06	0.346972	0.0736956	7738	0.00285649	22.1611
GCST90027551	PWY.5656..mannosylglycerate.biosynthesis.I	rs35832957	T	C	0.161574	2.64873e-06	0.25379	0.0540401	7738	0.00284219	22.0498
GCST90027551	PWY.5656..mannosylglycerate.biosynthesis.I	rs10001022	T	C	0.0692782	5.50946e-08	0.397916	0.0732267	7738	0.00380156	29.5211
GCST90027551	PWY.5656..mannosylglycerate.biosynthesis.I	rs844134	T	C	0.290074	4.67361e-06	-0.199912	0.0436591	7738	0.00270224	20.9612
GCST90027551	PWY.5656..mannosylglycerate.biosynthesis.I	rs273145	C	T	0.686695	6.25852e-06	0.183214	0.0405569	7738	0.00263037	20.4022
GCST90027551	PWY.5656..mannosylglycerate.biosynthesis.I	rs12667987	G	C	0.459822	8.9512e-06	-0.181826	0.0409418	7738	0.00254238	19.718
GCST90027551	PWY.5656..mannosylglycerate.biosynthesis.I	rs11217548	T	C	0.0682151	4.80205e-06	-0.34505	0.0754496	7738	0.00269557	20.9093
GCST90027551	PWY.5656..mannosylglycerate.biosynthesis.I	rs12719736	T	C	0.146262	7.31497e-06	0.238351	0.0531521	7738	0.002592	20.1039
GCST90027551	PWY.5656..mannosylglycerate.biosynthesis.I	rs28510778	T	C	0.0522974	3.77328e-06	-0.412225	0.0891587	7738	0.00275495	21.3712
GCST90027551	PWY.5656..mannosylglycerate.biosynthesis.I	rs12930516	C	T	0.561242	3.2972e-06	0.178996	0.0384823	7738	0.00278819	21.6298
GCST90027551	PWY.5656..mannosylglycerate.biosynthesis.I	rs6063434	G	A	0.771033	4.99243e-06	-0.208672	0.0457102	7738	0.00268599	20.8348
GCST90027552	PWY.5659..GDP.mannose.biosynthesis	rs13007173	G	A	0.101073	5.57516e-06	0.129791	0.0285764	7738	0.00265882	20.6235
GCST90027552	PWY.5659..GDP.mannose.biosynthesis	rs56385884	G	A	0.0888632	6.25055e-06	-0.127456	0.0282124	7738	0.00263068	20.4046
GCST90027552	PWY.5659..GDP.mannose.biosynthesis	rs73100534	C	G	0.0944874	1.89397e-06	-0.132943	0.0279034	7738	0.00292496	22.6938
GCST90027552	PWY.5659..GDP.mannose.biosynthesis	rs2666365	T	C	0.176541	4.32457e-06	-0.0953908	0.020759	7738	0.00272136	21.1099
GCST90027552	PWY.5659..GDP.mannose.biosynthesis	rs4837963	T	C	0.116006	1.38987e-06	0.121846	0.0252455	7738	0.00300139	23.2886
GCST90027552	PWY.5659..GDP.mannose.biosynthesis	rs7086625	T	G	0.15398	2.14939e-06	0.104962	0.0221493	7738	0.00289373	22.4509
GCST90027552	PWY.5659..GDP.mannose.biosynthesis	rs72929354	C	G	0.0635831	3.70176e-06	-0.162909	0.0352049	7738	0.00275967	21.4079
GCST90027552	PWY.5659..GDP.mannose.biosynthesis	rs73170444	A	C	0.0520125	3.12747e-07	0.212819	0.041602	7738	0.00337053	26.1626
GCST90027553	PWY.5667..CDP.diacylglycerol.biosynthesis.I	rs3860223	T	C	0.808219	7.5066e-06	0.0907144	0.0202542	7738	0.00258565	20.0544
GCST90027553	PWY.5667..CDP.diacylglycerol.biosynthesis.I	rs111866871	G	A	0.110014	3.36134e-06	-0.117675	0.0253206	7738	0.00278344	21.5928
GCST90027553	PWY.5667..CDP.diacylglycerol.biosynthesis.I	rs304820	T	G	0.307552	6.54021e-06	-0.0780772	0.0173192	7738	0.00261954	20.318
GCST90027553	PWY.5667..CDP.diacylglycerol.biosynthesis.I	rs73087038	C	T	0.0592312	3.41208e-06	-0.160748	0.0346118	7738	0.00277975	21.5641
GCST90027553	PWY.5667..CDP.diacylglycerol.biosynthesis.I	rs76005509	A	C	0.118369	1.83274e-06	-0.120097	0.025172	7738	0.00293307	22.757
GCST90027553	PWY.5667..CDP.diacylglycerol.biosynthesis.I	rs9853551	C	T	0.625431	5.5654e-06	0.0742126	0.0163382	7738	0.00265925	20.6268
GCST90027553	PWY.5667..CDP.diacylglycerol.biosynthesis.I	rs74537816	C	T	0.1229	3.91917e-06	-0.11528	0.024976	7738	0.0027456	21.2985
GCST90027553	PWY.5667..CDP.diacylglycerol.biosynthesis.I	rs11764255	A	C	0.168117	1.83525e-06	0.103612	0.0217181	7738	0.00293273	22.7543
GCST90027553	PWY.5667..CDP.diacylglycerol.biosynthesis.I	rs2227019	C	G	0.176764	7.49102e-06	0.0991645	0.0221387	7738	0.00258616	20.0584
GCST90027553	PWY.5667..CDP.diacylglycerol.biosynthesis.I	rs1565690	A	G	0.0589198	4.98549e-07	0.175471	0.0349066	7738	0.003255	25.2629
GCST90027553	PWY.5667..CDP.diacylglycerol.biosynthesis.I	rs72768324	C	T	0.146899	6.62989e-06	0.104081	0.0231023	7738	0.00261619	20.2919
GCST90027553	PWY.5667..CDP.diacylglycerol.biosynthesis.I	rs11040918	C	T	0.645727	6.98073e-06	0.0782005	0.0174	7738	0.00260351	20.1933
GCST90027553	PWY.5667..CDP.diacylglycerol.biosynthesis.I	rs2662200	G	A	0.547052	6.10081e-06	-0.0720332	0.0159265	7738	0.00263665	20.451
GCST90027553	PWY.5667..CDP.diacylglycerol.biosynthesis.I	rs2899122	G	T	0.915703	1.45498e-06	-0.141827	0.029441	7738	0.00299007	23.2006
GCST90027553	PWY.5667..CDP.diacylglycerol.biosynthesis.I	rs62087427	G	A	0.100849	8.5759e-06	0.11829	0.0265803	7738	0.00255291	19.7999
GCST90027553	PWY.5667..CDP.diacylglycerol.biosynthesis.I	rs10409224	G	A	0.354823	3.59637e-06	-0.0785661	0.0169563	7738	0.00276678	21.4632
GCST90027553	PWY.5667..CDP.diacylglycerol.biosynthesis.I	rs11086863	A	G	0.360961	8.61526e-06	-0.0782674	0.017591	7738	0.00255178	19.7911
GCST90027554	PWY.5676..acetyl.CoA.fermentation.to.butanoate.II	rs4476386	G	C	0.5405	7.6351e-06	-0.0729334	0.0162973	7738	0.00258147	20.022
GCST90027554	PWY.5676..acetyl.CoA.fermentation.to.butanoate.II	rs10933259	G	A	0.287092	3.90137e-06	0.0833518	0.0180549	7738	0.00274673	21.3072
GCST90027554	PWY.5676..acetyl.CoA.fermentation.to.butanoate.II	rs55906502	G	A	0.0889034	8.2451e-06	0.130872	0.0293518	7738	0.00256258	19.875
GCST90027554	PWY.5676..acetyl.CoA.fermentation.to.butanoate.II	rs34218333	A	T	0.206715	7.14636e-06	0.0915685	0.0203971	7738	0.00259774	20.1484
GCST90027554	PWY.5676..acetyl.CoA.fermentation.to.butanoate.II	rs7043302	T	G	0.0508132	1.46708e-06	0.187733	0.0389839	7738	0.00298803	23.1847
GCST90027554	PWY.5676..acetyl.CoA.fermentation.to.butanoate.II	rs409534	T	C	0.209549	4.15126e-06	-0.0932478	0.0202551	7738	0.00273143	21.1882
GCST90027554	PWY.5676..acetyl.CoA.fermentation.to.butanoate.II	rs4533289	A	G	0.129961	1.18583e-06	-0.11869	0.0244319	7738	0.00304062	23.594
GCST90027554	PWY.5676..acetyl.CoA.fermentation.to.butanoate.II	rs11077815	C	T	0.616275	2.93898e-06	-0.0791191	0.0169237	7738	0.00281655	21.8503
GCST90027554	PWY.5676..acetyl.CoA.fermentation.to.butanoate.II	rs150794	G	C	0.791033	7.49055e-06	-0.0954321	0.0213054	7738	0.00258617	20.0585
GCST90027555	PWY.5686..UMP.biosynthesis	rs801356	C	G	0.941383	9.61277e-06	0.154211	0.0348444	7738	0.00252487	19.5818
GCST90027555	PWY.5686..UMP.biosynthesis	rs111943101	A	G	0.185595	8.52811e-06	-0.10313	0.0231675	7738	0.00255428	19.8105
GCST90027555	PWY.5686..UMP.biosynthesis	rs542914	A	C	0.39647	3.61641e-06	0.0789129	0.0170354	7738	0.00276542	21.4526
GCST90027555	PWY.5686..UMP.biosynthesis	rs72918404	C	T	0.147413	4.40607e-06	-0.105726	0.0230278	7738	0.00271676	21.0741
GCST90027555	PWY.5686..UMP.biosynthesis	rs217010	A	T	0.544723	1.71057e-06	0.0783441	0.0163731	7738	0.0029501	22.8895
GCST90027555	PWY.5686..UMP.biosynthesis	rs10100272	G	A	0.832233	4.057e-06	0.104402	0.0226546	7738	0.00273709	21.2322
GCST90027555	PWY.5686..UMP.biosynthesis	rs7108080	A	G	0.508635	4.41276e-06	-0.0769942	0.0167709	7738	0.00271638	21.0712
GCST90027555	PWY.5686..UMP.biosynthesis	rs754639	A	G	0.33023	2.5188e-06	0.0870085	0.0184865	7738	0.0028546	22.1464
GCST90027556	PWY.5695..urate.biosynthesis.inosine.5..phosphate.degradation	rs7551751	A	G	0.598166	6.14737e-06	0.0744567	0.0164681	7738	0.00263478	20.4365
GCST90027556	PWY.5695..urate.biosynthesis.inosine.5..phosphate.degradation	rs57434716	A	G	0.325696	8.32466e-06	0.0773641	0.0173592	7738	0.00256022	19.8567
GCST90027556	PWY.5695..urate.biosynthesis.inosine.5..phosphate.degradation	rs10057035	C	T	0.333288	9.46537e-06	-0.0765501	0.0172837	7738	0.00252866	19.6113
GCST90027556	PWY.5695..urate.biosynthesis.inosine.5..phosphate.degradation	rs116873962	T	G	0.13023	7.9971e-06	0.110536	0.0247545	7738	0.00257008	19.9334
GCST90027556	PWY.5695..urate.biosynthesis.inosine.5..phosphate.degradation	rs560351	T	A	0.823673	8.71525e-06	0.0969695	0.0218065	7738	0.00254895	19.7691
GCST90027556	PWY.5695..urate.biosynthesis.inosine.5..phosphate.degradation	rs11139701	C	T	0.127457	6.56636e-06	0.111525	0.0247432	7738	0.00261856	20.3103
GCST90027556	PWY.5695..urate.biosynthesis.inosine.5..phosphate.degradation	rs573126	C	A	0.285267	7.30036e-06	-0.0818401	0.0182486	7738	0.0025925	20.1077
GCST90027556	PWY.5695..urate.biosynthesis.inosine.5..phosphate.degradation	rs98545	T	C	0.128081	9.20152e-06	0.111512	0.0251428	7738	0.00253561	19.6653
GCST90027556	PWY.5695..urate.biosynthesis.inosine.5..phosphate.degradation	rs1561691	A	G	0.851021	9.08783e-06	0.10183	0.022946	7738	0.00253866	19.6891
GCST90027556	PWY.5695..urate.biosynthesis.inosine.5..phosphate.degradation	rs11668451	G	A	0.0913128	6.40544e-06	-0.127508	0.0282562	7738	0.00262466	20.3578
GCST90027556	PWY.5695..urate.biosynthesis.inosine.5..phosphate.degradation	rs111983634	A	T	0.0574869	7.32695e-06	-0.165132	0.0368272	7738	0.0025916	20.1007
GCST90027557	PWY.5705..allantoin.degradation.to.glyoxylate.III	rs4669688	C	T	0.622084	4.93496e-06	0.146631	0.0321029	7738	0.00268884	20.857
GCST90027557	PWY.5705..allantoin.degradation.to.glyoxylate.III	rs3820904	G	A	0.768846	7.80566e-06	-0.160534	0.03591	7738	0.00257604	19.9797
GCST90027557	PWY.5705..allantoin.degradation.to.glyoxylate.III	rs16851172	G	A	0.193511	1.48212e-06	-0.190818	0.0396411	7738	0.00298551	23.1651
GCST90027557	PWY.5705..allantoin.degradation.to.glyoxylate.III	rs4683801	G	A	0.273418	6.16826e-06	0.17208	0.0380662	7738	0.00263394	20.43
GCST90027557	PWY.5705..allantoin.degradation.to.glyoxylate.III	rs10937272	G	C	0.338586	3.76468e-07	0.166947	0.0328605	7738	0.00332457	25.8047
GCST90027557	PWY.5705..allantoin.degradation.to.glyoxylate.III	rs28465688	A	C	0.531041	4.59338e-06	0.140849	0.0307359	7738	0.0027065	20.9943
GCST90027557	PWY.5705..allantoin.degradation.to.glyoxylate.III	rs13140123	A	T	0.0865392	8.06789e-06	-0.255831	0.0573178	7738	0.00256792	19.9166
GCST90027557	PWY.5705..allantoin.degradation.to.glyoxylate.III	rs7822956	G	A	0.814694	1.6799e-07	0.211638	0.0404533	7738	0.00352466	27.3632
GCST90027557	PWY.5705..allantoin.degradation.to.glyoxylate.III	rs12449342	A	G	0.722053	5.73451e-06	0.160955	0.0354844	7738	0.00265188	20.5695
GCST90027557	PWY.5705..allantoin.degradation.to.glyoxylate.III	rs16993923	G	A	0.172361	7.56565e-06	-0.205762	0.0459587	7738	0.00258372	20.0394
GCST90027558	PWY.5791..1.4.dihydroxy.2.naphthoate.biosynthesis.II..plants.	rs10192555	C	T	0.568064	5.74435e-06	0.105255	0.0232064	7738	0.00265146	20.5662
GCST90027558	PWY.5791..1.4.dihydroxy.2.naphthoate.biosynthesis.II..plants.	rs7691920	G	A	0.702496	6.34567e-06	0.116198	0.0257387	7738	0.00262697	20.3757
GCST90027558	PWY.5791..1.4.dihydroxy.2.naphthoate.biosynthesis.II..plants.	rs80031880	C	T	0.0649738	5.76838e-06	0.251853	0.0555391	7738	0.00265043	20.5582
GCST90027558	PWY.5791..1.4.dihydroxy.2.naphthoate.biosynthesis.II..plants.	rs3846235	T	C	0.415117	7.42952e-06	-0.10545	0.0235326	7738	0.00258818	20.0741
GCST90027558	PWY.5791..1.4.dihydroxy.2.naphthoate.biosynthesis.II..plants.	rs207254	C	G	0.49049	1.97901e-06	0.109973	0.0231251	7738	0.00291411	22.6095
GCST90027558	PWY.5791..1.4.dihydroxy.2.naphthoate.biosynthesis.II..plants.	rs62465767	A	G	0.0949348	9.82284e-06	0.177111	0.040061	7738	0.00251956	19.5405
GCST90027558	PWY.5791..1.4.dihydroxy.2.naphthoate.biosynthesis.II..plants.	rs4585628	G	A	0.104614	7.45537e-06	0.170362	0.038025	7738	0.00258733	20.0675
GCST90027558	PWY.5791..1.4.dihydroxy.2.naphthoate.biosynthesis.II..plants.	rs11761901	A	G	0.213855	7.75143e-07	-0.137544	0.0278344	7738	0.00314575	24.4123
GCST90027558	PWY.5791..1.4.dihydroxy.2.naphthoate.biosynthesis.II..plants.	rs28634397	T	C	0.079774	3.43783e-06	0.196644	0.042355	7738	0.0027779	21.5497
GCST90027558	PWY.5791..1.4.dihydroxy.2.naphthoate.biosynthesis.II..plants.	rs9886448	C	T	0.123965	5.47488e-06	-0.15792	0.0347403	7738	0.00266329	20.6582
GCST90027558	PWY.5791..1.4.dihydroxy.2.naphthoate.biosynthesis.II..plants.	rs61861701	G	A	0.247235	4.38984e-07	0.138831	0.0274846	7738	0.00328651	25.5083
GCST90027558	PWY.5791..1.4.dihydroxy.2.naphthoate.biosynthesis.II..plants.	rs34011530	G	C	0.18175	7.92768e-06	-0.134451	0.0300979	7738	0.00257223	19.9501
GCST90027558	PWY.5791..1.4.dihydroxy.2.naphthoate.biosynthesis.II..plants.	rs10793056	C	T	0.506205	5.73174e-06	-0.104156	0.0229619	7738	0.002652	20.5704
GCST90027558	PWY.5791..1.4.dihydroxy.2.naphthoate.biosynthesis.II..plants.	rs996888	G	A	0.902701	2.939e-06	-0.182271	0.0389881	7738	0.00281654	21.8503
GCST90027558	PWY.5791..1.4.dihydroxy.2.naphthoate.biosynthesis.II..plants.	rs12327456	T	A	0.20964	1.76919e-06	0.13543	0.0283437	7738	0.00294178	22.8248
GCST90027558	PWY.5791..1.4.dihydroxy.2.naphthoate.biosynthesis.II..plants.	rs2834173	C	T	0.424138	4.73158e-06	-0.107002	0.0233815	7738	0.00269921	20.9376
GCST90027558	PWY.5791..1.4.dihydroxy.2.naphthoate.biosynthesis.II..plants.	rs9941912	C	G	0.0607982	1.58421e-06	-0.239966	0.0499897	7738	0.00296906	23.037
GCST90027559	PWY.5838..superpathway.of.menaquinol.8.biosynthesis.I	rs2010010	C	T	0.231858	1.1305e-06	0.172641	0.0354685	7738	0.00305243	23.6859
GCST90027559	PWY.5838..superpathway.of.menaquinol.8.biosynthesis.I	rs1551680	T	C	0.0532869	9.75443e-06	0.304768	0.0689124	7738	0.00252127	19.5539
GCST90027559	PWY.5838..superpathway.of.menaquinol.8.biosynthesis.I	rs8045590	A	C	0.888889	3.80106e-06	0.212173	0.0459052	7738	0.00275314	21.3571
GCST90027559	PWY.5838..superpathway.of.menaquinol.8.biosynthesis.I	rs71323853	A	G	0.0852969	5.9615e-06	-0.243918	0.0538717	7738	0.00264233	20.4952
GCST90027560	PWY.5850..superpathway.of.menaquinol.6.biosynthesis.I	rs76253510	A	G	0.0672308	3.27263e-06	0.321464	0.0690886	7738	0.00279003	21.6441
GCST90027560	PWY.5850..superpathway.of.menaquinol.6.biosynthesis.I	rs4306193	A	C	0.494895	9.87622e-06	0.147132	0.0332888	7738	0.00251822	19.5302
GCST90027560	PWY.5850..superpathway.of.menaquinol.6.biosynthesis.I	rs4075150	A	G	0.500912	2.60717e-06	-0.159952	0.0340355	7738	0.00284609	22.0802
GCST90027560	PWY.5850..superpathway.of.menaquinol.6.biosynthesis.I	rs6444585	A	G	0.683973	6.96342e-06	0.170074	0.037838	7738	0.00260412	20.198
GCST90027560	PWY.5850..superpathway.of.menaquinol.6.biosynthesis.I	rs11753487	C	T	0.133847	2.17431e-06	-0.253668	0.0535559	7738	0.00289088	22.4287
GCST90027560	PWY.5850..superpathway.of.menaquinol.6.biosynthesis.I	rs875897	G	C	0.867016	2.98689e-06	-0.241421	0.0516772	7738	0.00281256	21.8193
GCST90027560	PWY.5850..superpathway.of.menaquinol.6.biosynthesis.I	rs10239134	A	G	0.103567	6.44259e-06	0.248673	0.055122	7738	0.00262324	20.3467
GCST90027560	PWY.5850..superpathway.of.menaquinol.6.biosynthesis.I	rs11824678	C	A	0.105913	7.28071e-06	0.247837	0.0552553	7738	0.00259316	20.1128
GCST90027560	PWY.5850..superpathway.of.menaquinol.6.biosynthesis.I	rs35620562	C	T	0.189708	8.47608e-06	-0.195456	0.0438952	7738	0.00255579	19.8222
GCST90027560	PWY.5850..superpathway.of.menaquinol.6.biosynthesis.I	rs3865408	T	A	0.104985	1.94068e-06	-0.274957	0.0577701	7738	0.00291894	22.647
GCST90027560	PWY.5850..superpathway.of.menaquinol.6.biosynthesis.I	rs62112542	A	G	0.235468	5.50159e-06	-0.184047	0.0404972	7738	0.00266209	20.6489
GCST90027561	PWY.5913..TCA.cycle.VI..obligate.autotrophs.	rs242053	T	C	0.058192	8.98985e-06	-0.218655	0.049245	7738	0.00254133	19.7098
GCST90027561	PWY.5913..TCA.cycle.VI..obligate.autotrophs.	rs2616174	T	C	0.257394	3.74912e-06	-0.111196	0.0240432	7738	0.00275653	21.3835
GCST90027561	PWY.5913..TCA.cycle.VI..obligate.autotrophs.	rs12006002	T	C	0.339664	3.61512e-06	-0.100171	0.0216243	7738	0.0027655	21.4533
GCST90027561	PWY.5913..TCA.cycle.VI..obligate.autotrophs.	rs61828192	G	C	0.147456	1.13121e-07	0.160365	0.0302332	7738	0.00362282	28.1281
GCST90027561	PWY.5913..TCA.cycle.VI..obligate.autotrophs.	rs17175056	G	A	0.121156	5.02909e-06	0.14359	0.0314645	7738	0.00268419	20.8208
GCST90027561	PWY.5913..TCA.cycle.VI..obligate.autotrophs.	rs28490985	A	T	0.226437	8.95831e-06	0.113361	0.0255265	7738	0.00254219	19.7165
GCST90027561	PWY.5913..TCA.cycle.VI..obligate.autotrophs.	rs6052371	T	C	0.214021	5.69361e-06	0.117615	0.0259209	7738	0.00265364	20.5832
GCST90027561	PWY.5913..TCA.cycle.VI..obligate.autotrophs.	rs2826386	T	C	0.416276	2.96456e-06	0.099493	0.0212898	7738	0.00281441	21.8337
GCST90027561	PWY.5913..TCA.cycle.VI..obligate.autotrophs.	rs743920	G	C	0.126928	2.50305e-06	-0.166238	0.0353105	7738	0.00285614	22.1584
GCST90027562	PWY.5918..superpathay.of.heme.biosynthesis.from.glutamate	rs12087936	A	G	0.141332	2.98579e-06	-0.145661	0.0311788	7738	0.00281265	21.82
GCST90027562	PWY.5918..superpathay.of.heme.biosynthesis.from.glutamate	rs76525743	C	T	0.074339	1.47867e-06	0.199721	0.0414867	7738	0.00298608	23.1695
GCST90027562	PWY.5918..superpathay.of.heme.biosynthesis.from.glutamate	rs68116107	G	A	0.111485	9.69332e-06	0.161386	0.0364803	7738	0.00252282	19.5659
GCST90027562	PWY.5918..superpathay.of.heme.biosynthesis.from.glutamate	rs35586568	A	G	0.0535691	8.67464e-06	0.228485	0.0513702	7738	0.0025501	19.778
GCST90027562	PWY.5918..superpathay.of.heme.biosynthesis.from.glutamate	rs4831157	C	G	0.436833	1.88951e-06	0.108553	0.0227817	7738	0.00292554	22.6984
GCST90027562	PWY.5918..superpathay.of.heme.biosynthesis.from.glutamate	rs2913384	A	G	0.924665	5.94415e-06	-0.188034	0.0415236	7738	0.00264305	20.5008
GCST90027562	PWY.5918..superpathay.of.heme.biosynthesis.from.glutamate	rs10089785	C	T	0.401736	8.46169e-06	0.101733	0.0228451	7738	0.00255621	19.8255
GCST90027562	PWY.5918..superpathay.of.heme.biosynthesis.from.glutamate	rs61344468	G	A	0.124387	3.87242e-06	-0.156927	0.0339806	7738	0.00274856	21.3215
GCST90027562	PWY.5918..superpathay.of.heme.biosynthesis.from.glutamate	rs7221236	G	A	0.638583	8.63463e-06	0.10055	0.0226016	7738	0.00255123	19.7868
GCST90027562	PWY.5918..superpathay.of.heme.biosynthesis.from.glutamate	rs2116877	T	C	0.902589	9.04293e-06	-0.164697	0.0371034	7738	0.00253988	19.6985
GCST90027563	PWY.5920..superpathway.of.heme.biosynthesis.from.glycine	rs2078597	G	A	0.10434	6.186e-07	-0.294388	0.059051	7738	0.00320158	24.847
GCST90027563	PWY.5920..superpathway.of.heme.biosynthesis.from.glycine	rs56931274	T	G	0.283056	8.64054e-06	-0.175476	0.0394446	7738	0.00255106	19.7855
GCST90027563	PWY.5920..superpathway.of.heme.biosynthesis.from.glycine	rs147911740	A	G	0.0662413	1.31171e-06	0.345903	0.0714976	7738	0.00301569	23.3999
GCST90027563	PWY.5920..superpathway.of.heme.biosynthesis.from.glycine	rs11771094	A	G	0.400993	8.65497e-06	-0.158301	0.0355869	7738	0.00255065	19.7823
GCST90027563	PWY.5920..superpathway.of.heme.biosynthesis.from.glycine	rs10429455	C	G	0.51264	3.46887e-06	-0.164629	0.0354734	7738	0.00277568	21.5324
GCST90027563	PWY.5920..superpathway.of.heme.biosynthesis.from.glycine	rs74471865	A	G	0.0533491	9.42178e-06	0.341856	0.0771678	7738	0.0025298	19.6201
GCST90027563	PWY.5920..superpathway.of.heme.biosynthesis.from.glycine	rs7125672	G	A	0.562181	7.41463e-07	-0.178111	0.0359808	7738	0.00315674	24.4979
GCST90027563	PWY.5920..superpathway.of.heme.biosynthesis.from.glycine	rs414161	G	A	0.28364	7.90803e-06	0.169392	0.0379151	7738	0.00257284	19.9548
GCST90027563	PWY.5920..superpathway.of.heme.biosynthesis.from.glycine	rs12821396	T	C	0.0510083	5.8067e-07	0.396267	0.0792925	7738	0.00321724	24.9689
GCST90027563	PWY.5920..superpathway.of.heme.biosynthesis.from.glycine	rs73160295	A	G	0.100678	9.76965e-06	-0.257202	0.0581614	7738	0.00252089	19.5509
GCST90027563	PWY.5920..superpathway.of.heme.biosynthesis.from.glycine	rs34838879	G	A	0.0559422	1.82016e-06	0.416083	0.0871847	7738	0.00293477	22.7702
GCST90027564	PWY.5941..glycogen.degradation.II..eukaryotic.	rs79195460	T	C	0.0548497	7.12186e-06	0.193987	0.043204	7738	0.00259858	20.155
GCST90027564	PWY.5941..glycogen.degradation.II..eukaryotic.	rs73816874	T	C	0.434074	8.44639e-06	0.0869627	0.0195266	7738	0.00255665	19.8289
GCST90027564	PWY.5941..glycogen.degradation.II..eukaryotic.	rs2484671	C	G	0.0962477	4.68595e-06	-0.156409	0.0341626	7738	0.00270159	20.9561
GCST90027564	PWY.5941..glycogen.degradation.II..eukaryotic.	rs4148913	G	A	0.443434	2.71812e-06	0.0924275	0.019703	7738	0.00283581	22.0002
GCST90027564	PWY.5941..glycogen.degradation.II..eukaryotic.	rs78689694	C	G	0.149301	2.88568e-06	0.125408	0.0268035	7738	0.00282106	21.8855
GCST90027564	PWY.5941..glycogen.degradation.II..eukaryotic.	rs118026734	T	C	0.0577757	6.50394e-06	0.205727	0.0456228	7738	0.00262091	20.3286
GCST90027564	PWY.5941..glycogen.degradation.II..eukaryotic.	rs321605	T	C	0.607674	3.82874e-06	-0.0920684	0.0199262	7738	0.00275136	21.3432
GCST90027564	PWY.5941..glycogen.degradation.II..eukaryotic.	rs12606812	T	G	0.574679	4.9938e-06	0.0896761	0.0196441	7738	0.00268593	20.8343
GCST90027564	PWY.5941..glycogen.degradation.II..eukaryotic.	rs3764571	C	T	0.307387	5.84269e-06	-0.0948593	0.020931	7738	0.00264728	20.5337
GCST90027564	PWY.5941..glycogen.degradation.II..eukaryotic.	rs9979263	G	A	0.714393	9.83239e-06	0.110587	0.025015	7738	0.00251932	19.5387
GCST90027565	PWY.5971..palmitate.biosynthesis.II..bacteria.and.plants.	rs16824588	C	T	0.417526	6.3046e-06	-0.0812684	0.017996	7738	0.00262856	20.3882
GCST90027565	PWY.5971..palmitate.biosynthesis.II..bacteria.and.plants.	rs3936142	A	G	0.70319	8.33569e-07	0.0982908	0.0199481	7738	0.00312778	24.2724
GCST90027565	PWY.5971..palmitate.biosynthesis.II..bacteria.and.plants.	rs831864	C	T	0.903397	3.8188e-06	0.146258	0.0316506	7738	0.002752	21.3482
GCST90027565	PWY.5971..palmitate.biosynthesis.II..bacteria.and.plants.	rs58803641	G	A	0.117129	3.89232e-06	0.1277	0.0276583	7738	0.0027473	21.3116
GCST90027565	PWY.5971..palmitate.biosynthesis.II..bacteria.and.plants.	rs936232	A	G	0.355818	3.79459e-06	-0.0863461	0.0186802	7738	0.00275356	21.3604
GCST90027565	PWY.5971..palmitate.biosynthesis.II..bacteria.and.plants.	rs10065090	G	A	0.0795024	7.60565e-06	0.147556	0.0329661	7738	0.00258242	20.0293
GCST90027565	PWY.5971..palmitate.biosynthesis.II..bacteria.and.plants.	rs1154029	C	T	0.518805	9.59472e-06	-0.0817275	0.0184649	7738	0.00252533	19.5854
GCST90027565	PWY.5971..palmitate.biosynthesis.II..bacteria.and.plants.	rs12357875	T	C	0.0746233	3.06185e-06	0.157672	0.0337872	7738	0.00280645	21.7718
GCST90027565	PWY.5971..palmitate.biosynthesis.II..bacteria.and.plants.	rs28416225	A	G	0.20514	6.26721e-06	-0.109389	0.0242163	7738	0.00263003	20.3995
GCST90027565	PWY.5971..palmitate.biosynthesis.II..bacteria.and.plants.	rs1453942	G	A	0.559055	3.42743e-06	0.0838797	0.0180643	7738	0.00277864	21.5555
GCST90027565	PWY.5971..palmitate.biosynthesis.II..bacteria.and.plants.	rs1436177	A	G	0.243165	2.32207e-06	-0.0999631	0.0211644	7738	0.00287466	22.3025
GCST90027565	PWY.5971..palmitate.biosynthesis.II..bacteria.and.plants.	rs12605920	T	C	0.0546815	9.99223e-06	-0.181525	0.0410936	7738	0.00251536	19.5079
GCST90027565	PWY.5971..palmitate.biosynthesis.II..bacteria.and.plants.	rs6083566	C	A	0.692102	5.42079e-06	0.0896544	0.0197138	7738	0.00266573	20.6772
GCST90027565	PWY.5971..palmitate.biosynthesis.II..bacteria.and.plants.	rs2838445	C	G	0.444064	1.22868e-06	0.0877575	0.0180908	7738	0.00303185	23.5257
GCST90027566	PWY.5973..cis.vaccenate.biosynthesis	rs72676149	T	C	0.0689379	1.99914e-07	-0.168586	0.032424	7738	0.0034815	27.027
GCST90027566	PWY.5973..cis.vaccenate.biosynthesis	rs36081122	A	G	0.0672964	4.52275e-06	0.158488	0.0345607	7738	0.00271032	21.024
GCST90027566	PWY.5973..cis.vaccenate.biosynthesis	rs13139468	G	A	0.754715	7.34678e-06	-0.0872292	0.0194561	7738	0.00259094	20.0956
GCST90027566	PWY.5973..cis.vaccenate.biosynthesis	rs1382794	C	A	0.647738	5.16506e-06	-0.0839889	0.0184268	7738	0.00267762	20.7697
GCST90027566	PWY.5973..cis.vaccenate.biosynthesis	rs72815470	A	T	0.0605177	9.47215e-06	-0.163954	0.0370193	7738	0.00252849	19.61
GCST90027566	PWY.5973..cis.vaccenate.biosynthesis	rs4278144	C	A	0.35137	2.25716e-06	0.0814217	0.0172178	7738	0.00288166	22.3569
GCST90027566	PWY.5973..cis.vaccenate.biosynthesis	rs7072479	C	A	0.476562	7.74834e-06	-0.0728056	0.0162802	7738	0.00257785	19.9938
GCST90027566	PWY.5973..cis.vaccenate.biosynthesis	rs4751058	A	G	0.15327	1.36842e-06	-0.10964	0.022702	7738	0.00300523	23.3185
GCST90027566	PWY.5973..cis.vaccenate.biosynthesis	rs13377496	T	C	0.0869516	9.55547e-06	-0.13346	0.0301469	7738	0.00252633	19.5932
GCST90027566	PWY.5973..cis.vaccenate.biosynthesis	rs2889496	T	C	0.318099	1.15316e-06	0.0867878	0.0178446	7738	0.00304753	23.6477
GCST90027566	PWY.5973..cis.vaccenate.biosynthesis	rs11110734	T	C	0.0881286	9.43913e-06	0.128847	0.0290875	7738	0.00252934	19.6166
GCST90027566	PWY.5973..cis.vaccenate.biosynthesis	rs2039970	T	C	0.633698	7.69011e-06	0.0761333	0.0170182	7738	0.00257971	20.0082
GCST90027566	PWY.5973..cis.vaccenate.biosynthesis	rs2199729	A	C	0.0812798	7.50469e-06	0.139488	0.0311437	7738	0.00258571	20.0549
GCST90027566	PWY.5973..cis.vaccenate.biosynthesis	rs17509881	A	T	0.0603708	8.97977e-07	0.176081	0.0358414	7738	0.00310937	24.1291
GCST90027566	PWY.5973..cis.vaccenate.biosynthesis	rs483485	T	C	0.917203	4.01757e-06	0.140699	0.0305173	7738	0.0027395	21.251
GCST90027566	PWY.5973..cis.vaccenate.biosynthesis	rs7268601	A	T	0.31818	6.14834e-06	0.0814429	0.0180135	7738	0.00263474	20.4362
GCST90027567	PWY.5989..stearate.biosynthesis.II..bacteria.and.plants.	rs12611718	A	G	0.554349	6.84019e-06	0.0747537	0.0166171	7738	0.00260851	20.2322
GCST90027567	PWY.5989..stearate.biosynthesis.II..bacteria.and.plants.	rs78561414	C	T	0.132735	5.04602e-06	-0.111273	0.0243866	7738	0.00268336	20.8144
GCST90027567	PWY.5989..stearate.biosynthesis.II..bacteria.and.plants.	rs62191280	C	G	0.168202	4.00673e-06	-0.1023	0.022186	7738	0.00274016	21.2561
GCST90027567	PWY.5989..stearate.biosynthesis.II..bacteria.and.plants.	rs114981645	A	G	0.0535532	9.23339e-08	-0.198497	0.0371633	7738	0.00367325	28.521
GCST90027567	PWY.5989..stearate.biosynthesis.II..bacteria.and.plants.	rs1335509	A	G	0.875546	3.14759e-06	-0.123858	0.0265736	7738	0.00279964	21.7188
GCST90027567	PWY.5989..stearate.biosynthesis.II..bacteria.and.plants.	rs2814198	G	A	0.81567	9.14275e-06	-0.0930354	0.0209704	7738	0.00253718	19.6776
GCST90027567	PWY.5989..stearate.biosynthesis.II..bacteria.and.plants.	rs1945878	C	T	0.841539	1.47328e-06	0.10788	0.0224058	7738	0.00298699	23.1766
GCST90027567	PWY.5989..stearate.biosynthesis.II..bacteria.and.plants.	rs73210347	T	A	0.0998431	2.15469e-06	0.131763	0.0278078	7738	0.00289312	22.4461
GCST90027568	PWY.6121..5.aminoimidazole.ribonucleotide.biosynthesis.I	rs17565738	C	T	0.130595	7.64603e-06	0.109393	0.0244461	7738	0.00258112	20.0192
GCST90027568	PWY.6121..5.aminoimidazole.ribonucleotide.biosynthesis.I	rs7422743	T	C	0.640166	3.74954e-06	0.0778904	0.0168419	7738	0.00275651	21.3833
GCST90027568	PWY.6121..5.aminoimidazole.ribonucleotide.biosynthesis.I	rs949889	T	C	0.823369	1.9403e-06	-0.0989242	0.0207844	7738	0.00291899	22.6474
GCST90027568	PWY.6121..5.aminoimidazole.ribonucleotide.biosynthesis.I	rs13013209	G	C	0.494561	8.37498e-06	-0.0755064	0.0169473	7738	0.00255874	19.8452
GCST90027568	PWY.6121..5.aminoimidazole.ribonucleotide.biosynthesis.I	rs2356936	G	C	0.752605	8.13489e-06	-0.0826788	0.0185312	7738	0.00256589	19.9008
GCST90027568	PWY.6121..5.aminoimidazole.ribonucleotide.biosynthesis.I	rs9404304	T	C	0.20735	5.47376e-06	0.0926412	0.0203797	7738	0.00266334	20.6586
GCST90027568	PWY.6121..5.aminoimidazole.ribonucleotide.biosynthesis.I	rs4960720	G	T	0.841949	1.59403e-06	0.103922	0.0216546	7738	0.00296753	23.0251
GCST90027568	PWY.6121..5.aminoimidazole.ribonucleotide.biosynthesis.I	rs7012282	C	G	0.130547	4.58312e-06	-0.108652	0.0237076	7738	0.00270706	20.9986
GCST90027568	PWY.6121..5.aminoimidazole.ribonucleotide.biosynthesis.I	rs3858437	A	G	0.227581	7.89079e-06	0.08431	0.0188692	7738	0.00257337	19.959
GCST90027568	PWY.6121..5.aminoimidazole.ribonucleotide.biosynthesis.I	rs112199808	A	C	0.0920788	4.0489e-06	-0.129859	0.028176	7738	0.00273758	21.2361
GCST90027568	PWY.6121..5.aminoimidazole.ribonucleotide.biosynthesis.I	rs415502	C	A	0.539416	9.02281e-06	0.0706113	0.0159058	7738	0.00254043	19.7028
GCST90027569	PWY.6123..inosine.5..phosphate.biosynthesis.I	rs79744905	C	A	0.16705	8.72407e-06	0.0965123	0.0217047	7738	0.0025487	19.7671
GCST90027569	PWY.6123..inosine.5..phosphate.biosynthesis.I	rs7713337	C	T	0.348096	1.48519e-06	0.0823339	0.0171058	7738	0.002985	23.1611
GCST90027569	PWY.6123..inosine.5..phosphate.biosynthesis.I	rs2555143	G	T	0.611075	7.61631e-06	0.073762	0.0164806	7738	0.00258208	20.0267
GCST90027569	PWY.6123..inosine.5..phosphate.biosynthesis.I	rs1802608	T	C	0.0601283	6.23719e-06	-0.156526	0.0346435	7738	0.00263121	20.4087
GCST90027569	PWY.6123..inosine.5..phosphate.biosynthesis.I	rs3217852	C	G	0.221903	9.47833e-06	-0.0863884	0.0195063	7738	0.00252833	19.6087
GCST90027569	PWY.6123..inosine.5..phosphate.biosynthesis.I	rs1076198	T	G	0.171427	8.34754e-06	0.0948556	0.0212868	7738	0.00255954	19.8514
GCST90027569	PWY.6123..inosine.5..phosphate.biosynthesis.I	rs7236342	G	C	0.499865	1.39686e-06	-0.0790259	0.0163769	7738	0.00300015	23.279
GCST90027570	PWY.6125..superpathway.of.guanosine.nucleotides.de.novo.biosynthesis.II	rs12035670	T	C	0.332632	2.73344e-06	-0.0832324	0.0177472	7738	0.00283442	21.9894
GCST90027570	PWY.6125..superpathway.of.guanosine.nucleotides.de.novo.biosynthesis.II	rs67977127	G	C	0.157117	2.64355e-07	0.121055	0.0235185	7738	0.0034122	26.4872
GCST90027570	PWY.6125..superpathway.of.guanosine.nucleotides.de.novo.biosynthesis.II	rs72923573	A	G	0.115623	6.58783e-06	0.117939	0.0261704	7738	0.00261775	20.3041
GCST90027570	PWY.6125..superpathway.of.guanosine.nucleotides.de.novo.biosynthesis.II	rs838736	A	G	0.539543	9.60845e-06	0.0730335	0.0165018	7738	0.00252498	19.5827
GCST90027570	PWY.6125..superpathway.of.guanosine.nucleotides.de.novo.biosynthesis.II	rs10484603	G	A	0.105581	2.96563e-06	0.138656	0.0296705	7738	0.00281432	21.833
GCST90027570	PWY.6125..superpathway.of.guanosine.nucleotides.de.novo.biosynthesis.II	rs62444998	C	A	0.114578	5.76285e-06	-0.117753	0.025966	7738	0.00265067	20.5601
GCST90027570	PWY.6125..superpathway.of.guanosine.nucleotides.de.novo.biosynthesis.II	rs4917011	T	C	0.223025	3.08675e-06	-0.0923215	0.0197904	7738	0.00280445	21.7562
GCST90027570	PWY.6125..superpathway.of.guanosine.nucleotides.de.novo.biosynthesis.II	rs11259346	T	C	0.325841	9.58026e-06	0.0779607	0.0176125	7738	0.0025257	19.5883
GCST90027570	PWY.6125..superpathway.of.guanosine.nucleotides.de.novo.biosynthesis.II	rs117176738	G	A	0.0555993	4.48465e-06	-0.164783	0.0359195	7738	0.0027124	21.0402
GCST90027570	PWY.6125..superpathway.of.guanosine.nucleotides.de.novo.biosynthesis.II	rs141529746	A	G	0.15493	9.03234e-06	-0.104617	0.023567	7738	0.00254017	19.7008
GCST90027570	PWY.6125..superpathway.of.guanosine.nucleotides.de.novo.biosynthesis.II	rs2831866	A	G	0.0718476	2.90015e-06	-0.168153	0.0359473	7738	0.00281983	21.8759
GCST90027571	PWY.6147..6.hydroxymethyl.dihydropterin.diphosphate.biosynthesis.I	rs9428255	T	C	0.915129	7.45967e-06	-0.13401	0.0299121	7738	0.00258719	20.0664
GCST90027571	PWY.6147..6.hydroxymethyl.dihydropterin.diphosphate.biosynthesis.I	rs73021847	C	T	0.055348	9.93013e-06	0.167156	0.0378294	7738	0.00251689	19.5198
GCST90027571	PWY.6147..6.hydroxymethyl.dihydropterin.diphosphate.biosynthesis.I	rs993597	G	A	0.752699	8.01741e-06	-0.0846073	0.0189502	7738	0.00256946	19.9286
GCST90027571	PWY.6147..6.hydroxymethyl.dihydropterin.diphosphate.biosynthesis.I	rs1813601	C	A	0.701239	8.75464e-06	0.0790939	0.0177905	7738	0.00254784	19.7604
GCST90027571	PWY.6147..6.hydroxymethyl.dihydropterin.diphosphate.biosynthesis.I	rs11732083	A	C	0.231878	3.91347e-06	0.0887252	0.0192215	7738	0.00274596	21.3013
GCST90027571	PWY.6147..6.hydroxymethyl.dihydropterin.diphosphate.biosynthesis.I	rs1366290	G	A	0.469278	2.32586e-06	-0.07591	0.016073	7738	0.00287426	22.2994
GCST90027571	PWY.6147..6.hydroxymethyl.dihydropterin.diphosphate.biosynthesis.I	rs7462652	G	C	0.52246	4.75349e-06	0.0731884	0.0159961	7738	0.00269807	20.9287
GCST90027571	PWY.6147..6.hydroxymethyl.dihydropterin.diphosphate.biosynthesis.I	rs10792007	C	T	0.565991	6.64703e-07	0.0803808	0.0161686	7738	0.00318379	24.7085
GCST90027571	PWY.6147..6.hydroxymethyl.dihydropterin.diphosphate.biosynthesis.I	rs2714053	G	A	0.598328	4.84967e-08	-0.0959623	0.017586	7738	0.00383327	29.7683
GCST90027571	PWY.6147..6.hydroxymethyl.dihydropterin.diphosphate.biosynthesis.I	rs77651025	C	G	0.0568179	9.52586e-06	0.16522	0.0373153	7738	0.0025271	19.5992
GCST90027571	PWY.6147..6.hydroxymethyl.dihydropterin.diphosphate.biosynthesis.I	rs2548882	C	A	0.822267	3.48232e-06	-0.100029	0.0215575	7738	0.00277473	21.525
GCST90027571	PWY.6147..6.hydroxymethyl.dihydropterin.diphosphate.biosynthesis.I	rs1940600	T	G	0.59842	3.09017e-06	0.0791541	0.0169686	7738	0.00280418	21.7541
GCST90027571	PWY.6147..6.hydroxymethyl.dihydropterin.diphosphate.biosynthesis.I	rs73401412	T	C	0.143375	3.4802e-06	-0.115537	0.024899	7738	0.00277488	21.5262
GCST90027571	PWY.6147..6.hydroxymethyl.dihydropterin.diphosphate.biosynthesis.I	rs11090280	C	T	0.484462	5.74367e-06	0.0724173	0.0159664	7738	0.00265149	20.5665
GCST90027571	PWY.6147..6.hydroxymethyl.dihydropterin.diphosphate.biosynthesis.I	rs5771226	C	T	0.535523	9.32121e-06	-0.0723826	0.0163305	7738	0.00253243	19.6406
GCST90027572	PWY.6151..S.adenosyl.L.methionine.cycle.I	rs7513344	A	C	0.0865728	1.79283e-09	0.181259	0.0301318	7738	0.00465473	36.1774
GCST90027572	PWY.6151..S.adenosyl.L.methionine.cycle.I	rs79033343	T	C	0.0748113	6.08504e-06	-0.137929	0.0304922	7738	0.00263728	20.456
GCST90027572	PWY.6151..S.adenosyl.L.methionine.cycle.I	rs1751578	T	C	0.446455	3.05442e-06	-0.0769954	0.0164974	7738	0.00280705	21.7764
GCST90027572	PWY.6151..S.adenosyl.L.methionine.cycle.I	rs62314649	A	G	0.144953	3.95956e-06	-0.108276	0.0234693	7738	0.00274308	21.2788
GCST90027572	PWY.6151..S.adenosyl.L.methionine.cycle.I	rs6879880	C	T	0.384954	2.18993e-06	0.0768625	0.0162327	7738	0.00288912	22.415
GCST90027572	PWY.6151..S.adenosyl.L.methionine.cycle.I	rs12530267	A	G	0.19027	1.45854e-06	0.0987123	0.0204932	7738	0.00298947	23.1959
GCST90027572	PWY.6151..S.adenosyl.L.methionine.cycle.I	rs11994131	G	A	0.453585	9.4069e-06	-0.0706273	0.0159416	7738	0.00253018	19.6232
GCST90027572	PWY.6151..S.adenosyl.L.methionine.cycle.I	rs12833807	G	C	0.464291	2.50084e-06	0.0764044	0.0162284	7738	0.00285636	22.1601
GCST90027572	PWY.6151..S.adenosyl.L.methionine.cycle.I	rs116996492	T	C	0.113678	5.88872e-07	-0.140893	0.0282078	7738	0.00321377	24.9419
GCST90027572	PWY.6151..S.adenosyl.L.methionine.cycle.I	rs2827430	A	G	0.077787	3.19349e-06	-0.140764	0.03022	7738	0.00279607	21.691
GCST90027572	PWY.6151..S.adenosyl.L.methionine.cycle.I	rs4818783	G	C	0.121313	5.18188e-06	-0.111704	0.024511	7738	0.00267682	20.7635
GCST90027572	PWY.6151..S.adenosyl.L.methionine.cycle.I	rs2235334	C	T	0.528302	1.0959e-07	-0.0835144	0.0157276	7738	0.0036307	28.1894
GCST90027572	PWY.6151..S.adenosyl.L.methionine.cycle.I	rs1807675	G	T	0.616935	8.31006e-06	-0.0726953	0.0163102	7738	0.00256065	19.86
GCST90027573	PWY.6163..chorismate.biosynthesis.from.3.dehydroquinate	rs2813909	T	C	0.220554	2.93053e-06	0.0906401	0.0193856	7738	0.00281726	21.8559
GCST90027573	PWY.6163..chorismate.biosynthesis.from.3.dehydroquinate	rs4581848	C	T	0.0517591	8.15478e-06	0.176156	0.0394872	7738	0.00256529	19.8961
GCST90027573	PWY.6163..chorismate.biosynthesis.from.3.dehydroquinate	rs75060356	A	G	0.201451	2.41314e-06	-0.0951399	0.0201767	7738	0.00286517	22.2286
GCST90027573	PWY.6163..chorismate.biosynthesis.from.3.dehydroquinate	rs1093520	G	T	0.915857	3.01309e-06	0.155616	0.033323	7738	0.00281041	21.8026
GCST90027573	PWY.6163..chorismate.biosynthesis.from.3.dehydroquinate	rs62568138	G	A	0.057462	5.92486e-06	0.161024	0.0355535	7738	0.00264385	20.507
GCST90027573	PWY.6163..chorismate.biosynthesis.from.3.dehydroquinate	rs113358976	C	A	0.0665154	8.65009e-06	0.1485	0.0333825	7738	0.00255079	19.7834
GCST90027573	PWY.6163..chorismate.biosynthesis.from.3.dehydroquinate	rs73200771	A	G	0.0520806	1.04793e-06	-0.174885	0.0358193	7738	0.00307118	23.8318
GCST90027573	PWY.6163..chorismate.biosynthesis.from.3.dehydroquinate	rs62097226	A	T	0.0639117	3.08253e-06	0.159255	0.0341364	7738	0.00280479	21.7589
GCST90027573	PWY.6163..chorismate.biosynthesis.from.3.dehydroquinate	rs7263922	T	C	0.232747	2.45741e-06	0.089691	0.0190361	7738	0.00286068	22.1937
GCST90027573	PWY.6163..chorismate.biosynthesis.from.3.dehydroquinate	rs136110	C	T	0.208243	2.20302e-06	0.095786	0.0202343	7738	0.00288765	22.4035
GCST90027574	PWY.621..sucrose.degradation.III..sucrose.invertase.	rs10515768	C	T	0.494986	5.25187e-06	0.0758433	0.0166525	7738	0.00267352	20.7378
GCST90027574	PWY.621..sucrose.degradation.III..sucrose.invertase.	rs1221558	T	G	0.805197	2.75617e-06	-0.097888	0.0208796	7738	0.00283238	21.9736
GCST90027574	PWY.621..sucrose.degradation.III..sucrose.invertase.	rs734738	T	C	0.544809	8.37302e-06	0.0769765	0.0172771	7738	0.00255879	19.8456
GCST90027574	PWY.621..sucrose.degradation.III..sucrose.invertase.	rs7798564	T	C	0.82517	3.66629e-06	-0.0977785	0.0211209	7738	0.00276204	21.4263
GCST90027574	PWY.621..sucrose.degradation.III..sucrose.invertase.	rs7989040	A	G	0.084858	1.2835e-06	-0.14697	0.0303512	7738	0.00302106	23.4417
GCST90027574	PWY.621..sucrose.degradation.III..sucrose.invertase.	rs75967282	C	G	0.0514132	3.43413e-07	-0.191576	0.0375793	7738	0.00334734	25.982
GCST90027574	PWY.621..sucrose.degradation.III..sucrose.invertase.	rs6504045	G	A	0.265218	3.0143e-06	0.0847977	0.0181586	7738	0.00281031	21.8018
GCST90027575	PWY.6263..superpathway.of.menaquinol.8.biosynthesis.II	rs11693339	C	T	0.296342	3.59209e-06	-0.1592	0.0343571	7738	0.00276708	21.4655
GCST90027575	PWY.6263..superpathway.of.menaquinol.8.biosynthesis.II	rs73883495	T	A	0.112841	8.49089e-06	-0.22072	0.049573	7738	0.00255536	19.8189
GCST90027575	PWY.6263..superpathway.of.menaquinol.8.biosynthesis.II	rs12218078	A	C	0.104227	5.99898e-06	-0.230734	0.0509749	7738	0.00264079	20.4832
GCST90027575	PWY.6263..superpathway.of.menaquinol.8.biosynthesis.II	rs78044740	G	A	0.0565355	3.29603e-06	0.312579	0.0672004	7738	0.00278828	21.6304
GCST90027575	PWY.6263..superpathway.of.menaquinol.8.biosynthesis.II	rs1006589	C	T	0.407314	5.34637e-06	0.153638	0.0337613	7738	0.00266913	20.7037
GCST90027576	PWY.6284..superpathway.of.unsaturated.fatty.acids.biosynthesis..E..coli.	rs17033379	C	G	0.144102	2.80884e-06	-0.120386	0.0256997	7738	0.00282771	21.9372
GCST90027576	PWY.6284..superpathway.of.unsaturated.fatty.acids.biosynthesis..E..coli.	rs6730157	G	A	0.268673	2.02628e-06	-0.0966221	0.0203381	7738	0.00290829	22.5641
GCST90027576	PWY.6284..superpathway.of.unsaturated.fatty.acids.biosynthesis..E..coli.	rs3774046	G	A	0.169099	6.68374e-06	0.108148	0.024014	7738	0.0026142	20.2764
GCST90027576	PWY.6284..superpathway.of.unsaturated.fatty.acids.biosynthesis..E..coli.	rs12511142	A	C	0.532631	8.36565e-06	0.0797793	0.0179054	7738	0.00255901	19.8473
GCST90027576	PWY.6284..superpathway.of.unsaturated.fatty.acids.biosynthesis..E..coli.	rs2961771	T	C	0.214148	3.78096e-06	0.101917	0.0220452	7738	0.00275445	21.3673
GCST90027576	PWY.6284..superpathway.of.unsaturated.fatty.acids.biosynthesis..E..coli.	rs61406022	A	G	0.23517	3.84838e-06	0.101809	0.0220395	7738	0.0027501	21.3334
GCST90027576	PWY.6284..superpathway.of.unsaturated.fatty.acids.biosynthesis..E..coli.	rs2903400	T	G	0.210115	3.95856e-06	-0.106115	0.0230007	7738	0.00274314	21.2793
GCST90027576	PWY.6284..superpathway.of.unsaturated.fatty.acids.biosynthesis..E..coli.	rs117882621	G	C	0.0745627	5.36158e-06	-0.178562	0.0392434	7738	0.00266843	20.6982
GCST90027576	PWY.6284..superpathway.of.unsaturated.fatty.acids.biosynthesis..E..coli.	rs10146289	A	G	0.413617	9.65271e-06	0.082696	0.0186892	7738	0.00252385	19.5739
GCST90027576	PWY.6284..superpathway.of.unsaturated.fatty.acids.biosynthesis..E..coli.	rs34824853	A	G	0.0632517	9.48524e-06	-0.188816	0.0426358	7738	0.00252815	19.6073
GCST90027576	PWY.6284..superpathway.of.unsaturated.fatty.acids.biosynthesis..E..coli.	rs142578694	T	C	0.170457	3.18264e-06	-0.116457	0.0249979	7738	0.00279691	21.6976
GCST90027577	PWY.6285..superpathway.of.fatty.acids.biosynthesis..E..coli.	rs4648487	C	T	0.387593	4.17638e-06	-0.145884	0.0316974	7738	0.00272995	21.1767
GCST90027577	PWY.6285..superpathway.of.fatty.acids.biosynthesis..E..coli.	rs11686319	A	G	0.194749	3.32646e-06	0.187164	0.0402541	7738	0.00278601	21.6128
GCST90027577	PWY.6285..superpathway.of.fatty.acids.biosynthesis..E..coli.	rs996426	C	A	0.278287	1.62262e-06	0.167575	0.0349441	7738	0.00296314	22.991
GCST90027577	PWY.6285..superpathway.of.fatty.acids.biosynthesis..E..coli.	rs9994112	A	G	0.197016	8.09968e-06	0.180107	0.0403597	7738	0.00256695	19.909
GCST90027577	PWY.6285..superpathway.of.fatty.acids.biosynthesis..E..coli.	rs1419253	G	A	0.371009	5.41416e-06	0.152911	0.0336211	7738	0.00266603	20.6795
GCST90027577	PWY.6285..superpathway.of.fatty.acids.biosynthesis..E..coli.	rs142500830	A	G	0.0514504	4.94334e-06	-0.322874	0.0706945	7738	0.00268843	20.8537
GCST90027577	PWY.6285..superpathway.of.fatty.acids.biosynthesis..E..coli.	rs1784430	T	C	0.606237	4.52292e-06	-0.149956	0.0327002	7738	0.00271031	21.024
GCST90027577	PWY.6285..superpathway.of.fatty.acids.biosynthesis..E..coli.	rs2507904	C	T	0.530025	7.89589e-06	-0.13966	0.0312578	7738	0.00257322	19.9578
GCST90027577	PWY.6285..superpathway.of.fatty.acids.biosynthesis..E..coli.	rs7322087	T	G	0.0967722	7.73193e-06	-0.254636	0.056934	7738	0.00257837	19.9979
GCST90027577	PWY.6285..superpathway.of.fatty.acids.biosynthesis..E..coli.	rs77859481	T	C	0.0999669	4.97726e-06	0.249398	0.0546238	7738	0.00268674	20.8406
GCST90027577	PWY.6285..superpathway.of.fatty.acids.biosynthesis..E..coli.	rs3861491	G	A	0.66192	8.42123e-07	-0.171693	0.0348592	7738	0.00312525	24.2527
GCST90027577	PWY.6285..superpathway.of.fatty.acids.biosynthesis..E..coli.	rs148303468	T	C	0.200859	4.74749e-06	0.177441	0.0387795	7738	0.00269838	20.9311
GCST90027578	PWY.6317..galactose.degradation.I..Leloir.pathway.	rs12035670	T	C	0.332632	3.79477e-06	0.081705	0.0176762	7738	0.00275355	21.3603
GCST90027578	PWY.6317..galactose.degradation.I..Leloir.pathway.	rs115981692	A	G	0.052016	2.87917e-06	0.168762	0.0360659	7738	0.00282162	21.8898
GCST90027578	PWY.6317..galactose.degradation.I..Leloir.pathway.	rs12623606	G	A	0.53817	6.30398e-06	-0.0734709	0.0162693	7738	0.00262859	20.3883
GCST90027578	PWY.6317..galactose.degradation.I..Leloir.pathway.	rs13016472	T	C	0.365216	3.07734e-06	0.0804267	0.0172383	7738	0.0028052	21.7621
GCST90027578	PWY.6317..galactose.degradation.I..Leloir.pathway.	rs10026887	T	C	0.309497	9.7164e-06	-0.0774366	0.0175062	7738	0.00252223	19.5613
GCST90027578	PWY.6317..galactose.degradation.I..Leloir.pathway.	rs2168031	A	G	0.133681	5.01065e-07	0.127102	0.0252894	7738	0.00325375	25.2532
GCST90027578	PWY.6317..galactose.degradation.I..Leloir.pathway.	rs34566098	G	A	0.0538268	3.55059e-06	0.176661	0.0381057	7738	0.00276994	21.4878
GCST90027578	PWY.6317..galactose.degradation.I..Leloir.pathway.	rs7998195	C	T	0.157971	7.62845e-06	0.0992887	0.0221857	7738	0.00258169	20.0236
GCST90027578	PWY.6317..galactose.degradation.I..Leloir.pathway.	rs35778179	T	C	0.0884996	8.32144e-06	-0.139098	0.0312106	7738	0.00256031	19.8574
GCST90027578	PWY.6317..galactose.degradation.I..Leloir.pathway.	rs79017683	T	C	0.0665022	5.10502e-06	-0.174312	0.0382226	7738	0.0026805	20.7921
GCST90027578	PWY.6317..galactose.degradation.I..Leloir.pathway.	rs12976953	T	C	0.0983496	1.81123e-06	0.134427	0.0281616	7738	0.00293598	22.7797
GCST90027579	PWY.6353..purine.nucleotides.degradation.II..aerobic.	rs10801008	T	C	0.204592	1.35773e-06	-0.0989151	0.0204746	7738	0.00300717	23.3336
GCST90027579	PWY.6353..purine.nucleotides.degradation.II..aerobic.	rs7527876	C	T	0.177998	3.03077e-06	-0.100104	0.0214414	7738	0.00280896	21.7913
GCST90027579	PWY.6353..purine.nucleotides.degradation.II..aerobic.	rs62167974	A	T	0.416264	7.64307e-06	-0.0760486	0.0169943	7738	0.00258122	20.02
GCST90027579	PWY.6353..purine.nucleotides.degradation.II..aerobic.	rs2895633	A	C	0.416051	8.12643e-07	-0.0828222	0.0167918	7738	0.00313407	24.3214
GCST90027579	PWY.6353..purine.nucleotides.degradation.II..aerobic.	rs396769	C	T	0.22785	4.62078e-06	0.0928377	0.0202644	7738	0.00270504	20.983
GCST90027579	PWY.6353..purine.nucleotides.degradation.II..aerobic.	rs2768981	G	C	0.285092	7.67971e-06	0.0847845	0.0189508	7738	0.00258004	20.0108
GCST90027579	PWY.6353..purine.nucleotides.degradation.II..aerobic.	rs12201310	A	C	0.129567	1.0398e-06	-0.120363	0.0246445	7738	0.00307311	23.8468
GCST90027579	PWY.6353..purine.nucleotides.degradation.II..aerobic.	rs13205108	T	C	0.0754677	8.19007e-06	0.140698	0.0315456	7738	0.00256422	19.8878
GCST90027579	PWY.6353..purine.nucleotides.degradation.II..aerobic.	rs4870408	C	T	0.0829161	5.56519e-06	0.137155	0.0301954	7738	0.00265926	20.6269
GCST90027579	PWY.6353..purine.nucleotides.degradation.II..aerobic.	rs2137304	A	G	0.0902271	4.25881e-08	-0.156047	0.028477	7738	0.00386557	30.0201
GCST90027579	PWY.6353..purine.nucleotides.degradation.II..aerobic.	rs12336386	A	G	0.148984	1.75662e-06	-0.110372	0.0230925	7738	0.00294354	22.8385
GCST90027579	PWY.6353..purine.nucleotides.degradation.II..aerobic.	rs61828192	G	C	0.141527	6.67658e-06	0.109316	0.0242723	7738	0.00261446	20.2785
GCST90027579	PWY.6353..purine.nucleotides.degradation.II..aerobic.	rs4551833	G	T	0.054037	3.28343e-06	-0.169028	0.0363326	7738	0.00278922	21.6378
GCST90027579	PWY.6353..purine.nucleotides.degradation.II..aerobic.	rs12877628	A	G	0.117642	7.32005e-06	-0.147379	0.0328665	7738	0.00259183	20.1025
GCST90027579	PWY.6353..purine.nucleotides.degradation.II..aerobic.	rs132685	C	G	0.291621	3.7546e-06	0.0872357	0.0188637	7738	0.00275617	21.3807
GCST90027580	PWY.6471..peptidoglycan.biosynthesis.IV..Enterococcus.faecium.	rs1521646	C	G	0.485067	6.46659e-06	-0.17565	0.0389423	7738	0.00262232	20.3396
GCST90027580	PWY.6471..peptidoglycan.biosynthesis.IV..Enterococcus.faecium.	rs3861977	T	A	0.123317	6.35118e-06	0.27831	0.0616502	7738	0.00262675	20.3741
GCST90027580	PWY.6471..peptidoglycan.biosynthesis.IV..Enterococcus.faecium.	rs28433201	C	A	0.103038	7.43506e-07	0.30954	0.0625379	7738	0.00315606	24.4926
GCST90027580	PWY.6471..peptidoglycan.biosynthesis.IV..Enterococcus.faecium.	rs610790	T	C	0.306114	3.07226e-06	-0.194498	0.0416848	7738	0.00280561	21.7653
GCST90027581	PWY.6507..4.deoxy.L.threo.hex.4.enopyranuronate.degradation	rs6705904	G	T	0.607331	1.42126e-06	0.0795887	0.0165053	7738	0.00299587	23.2457
GCST90027581	PWY.6507..4.deoxy.L.threo.hex.4.enopyranuronate.degradation	rs61798216	G	A	0.113463	3.69989e-06	-0.122536	0.0264795	7738	0.00275979	21.4088
GCST90027581	PWY.6507..4.deoxy.L.threo.hex.4.enopyranuronate.degradation	rs73035953	A	G	0.182607	4.36329e-06	-0.0971018	0.02114	7738	0.00271916	21.0928
GCST90027581	PWY.6507..4.deoxy.L.threo.hex.4.enopyranuronate.degradation	rs221841	C	T	0.506578	4.91876e-06	0.0736637	0.0161252	7738	0.00268965	20.8633
GCST90027581	PWY.6507..4.deoxy.L.threo.hex.4.enopyranuronate.degradation	rs2634527	C	T	0.498507	2.44055e-06	-0.0791804	0.0168003	7738	0.00286238	22.207
GCST90027581	PWY.6507..4.deoxy.L.threo.hex.4.enopyranuronate.degradation	rs74949229	A	G	0.0937926	1.56458e-06	-0.136508	0.0284225	7738	0.00297214	23.061
GCST90027581	PWY.6507..4.deoxy.L.threo.hex.4.enopyranuronate.degradation	rs12415307	G	A	0.28948	1.06303e-06	-0.0897529	0.0183935	7738	0.00306764	23.8043
GCST90027581	PWY.6507..4.deoxy.L.threo.hex.4.enopyranuronate.degradation	rs3785822	A	G	0.178252	2.87945e-06	0.0988308	0.0211211	7738	0.00282159	21.8896
GCST90027581	PWY.6507..4.deoxy.L.threo.hex.4.enopyranuronate.degradation	rs5756419	A	T	0.29333	7.7786e-06	0.0798299	0.0178543	7738	0.00257689	19.9864
GCST90027582	PWY.6519..8.amino.7.oxononanoate.biosynthesis.I	rs16824588	C	T	0.41912	6.03223e-06	-0.0758233	0.0167556	7738	0.00263943	20.4727
GCST90027582	PWY.6519..8.amino.7.oxononanoate.biosynthesis.I	rs9428065	T	C	0.794241	9.47053e-06	0.0918662	0.0207423	7738	0.00252853	19.6103
GCST90027582	PWY.6519..8.amino.7.oxononanoate.biosynthesis.I	rs72775871	A	G	0.0768355	7.92146e-06	-0.143865	0.0322042	7738	0.00257242	19.9516
GCST90027582	PWY.6519..8.amino.7.oxononanoate.biosynthesis.I	rs60960031	A	G	0.400586	1.42225e-06	-0.0818261	0.0169698	7738	0.00299569	23.2443
GCST90027582	PWY.6519..8.amino.7.oxononanoate.biosynthesis.I	rs3936142	A	G	0.702293	6.97346e-06	0.0830346	0.0184747	7738	0.00260376	20.1953
GCST90027582	PWY.6519..8.amino.7.oxononanoate.biosynthesis.I	rs936232	A	G	0.354711	4.87793e-06	-0.0793088	0.0173543	7738	0.00269171	20.8792
GCST90027582	PWY.6519..8.amino.7.oxononanoate.biosynthesis.I	rs10065090	G	A	0.0803112	7.14571e-06	0.136917	0.0304984	7738	0.00259776	20.1486
GCST90027582	PWY.6519..8.amino.7.oxononanoate.biosynthesis.I	rs17110951	C	G	0.0679397	4.38317e-06	-0.169484	0.0369058	7738	0.00271804	21.0841
GCST90027582	PWY.6519..8.amino.7.oxononanoate.biosynthesis.I	rs17176180	A	G	0.164509	9.40724e-06	-0.107894	0.0243533	7738	0.00253018	19.6231
GCST90027582	PWY.6519..8.amino.7.oxononanoate.biosynthesis.I	rs10408553	A	G	0.205165	2.97382e-06	0.0997311	0.0213437	7738	0.00281364	21.8277
GCST90027582	PWY.6519..8.amino.7.oxononanoate.biosynthesis.I	rs2838700	T	C	0.103103	5.94662e-06	0.128519	0.0283814	7738	0.00264295	20.5
GCST90027583	PWY.6545..pyrimidine.deoxyribonucleotides.de.novo.biosynthesis.III	rs9681001	T	C	0.1627	6.62297e-06	-0.100325	0.0222674	7738	0.00261644	20.2939
GCST90027583	PWY.6545..pyrimidine.deoxyribonucleotides.de.novo.biosynthesis.III	rs62335957	G	T	0.0738816	9.36273e-07	-0.152282	0.0310489	7738	0.00309904	24.0487
GCST90027583	PWY.6545..pyrimidine.deoxyribonucleotides.de.novo.biosynthesis.III	rs113333050	T	C	0.0707679	5.44263e-06	-0.146766	0.0322778	7738	0.00266474	20.6695
GCST90027583	PWY.6545..pyrimidine.deoxyribonucleotides.de.novo.biosynthesis.III	rs2381195	C	T	0.475705	7.07282e-06	0.0731366	0.0162834	7738	0.00260028	20.1682
GCST90027583	PWY.6545..pyrimidine.deoxyribonucleotides.de.novo.biosynthesis.III	rs9630400	G	C	0.326503	5.50569e-06	-0.0786746	0.0173119	7738	0.0026619	20.6475
GCST90027583	PWY.6545..pyrimidine.deoxyribonucleotides.de.novo.biosynthesis.III	rs1719290	T	C	0.389749	4.1689e-06	-0.0762109	0.0165576	7738	0.00273039	21.1801
GCST90027583	PWY.6545..pyrimidine.deoxyribonucleotides.de.novo.biosynthesis.III	rs2620049	A	G	0.0844744	8.62691e-06	-0.131349	0.0295233	7738	0.00255145	19.7885
GCST90027583	PWY.6545..pyrimidine.deoxyribonucleotides.de.novo.biosynthesis.III	rs144373948	G	A	0.586092	1.34371e-06	-0.0797501	0.0165006	7738	0.00300973	23.3536
GCST90027584	PWY.6588..pyruvate.fermentation.to.acetone	rs72697193	T	C	0.115289	1.65229e-06	0.163585	0.0341381	7738	0.00295866	22.9561
GCST90027584	PWY.6588..pyruvate.fermentation.to.acetone	rs12208192	C	G	0.253754	3.30032e-06	0.115602	0.0248543	7738	0.00278796	21.6279
GCST90027584	PWY.6588..pyruvate.fermentation.to.acetone	rs72958820	T	C	0.0539994	3.2886e-06	0.223922	0.0481355	7738	0.00278883	21.6348
GCST90027584	PWY.6588..pyruvate.fermentation.to.acetone	rs17860736	A	G	0.0534558	9.99267e-06	0.227408	0.0514809	7738	0.00251535	19.5078
GCST90027584	PWY.6588..pyruvate.fermentation.to.acetone	rs11136990	G	A	0.176978	4.50824e-06	-0.130281	0.0284056	7738	0.00271111	21.0302
GCST90027584	PWY.6588..pyruvate.fermentation.to.acetone	rs56059900	A	G	0.0664638	8.22749e-06	0.192896	0.0432582	7738	0.0025631	19.8791
GCST90027584	PWY.6588..pyruvate.fermentation.to.acetone	rs12681707	T	C	0.143991	5.51801e-06	0.137286	0.0302121	7738	0.00266135	20.6432
GCST90027584	PWY.6588..pyruvate.fermentation.to.acetone	rs7859760	G	T	0.517574	8.94926e-06	0.0942974	0.0212328	7738	0.00254244	19.7184
GCST90027584	PWY.6588..pyruvate.fermentation.to.acetone	rs181499	T	G	0.391915	6.98522e-06	0.103319	0.0229898	7738	0.00260335	20.1921
GCST90027584	PWY.6588..pyruvate.fermentation.to.acetone	rs10161329	A	G	0.130885	8.15602e-06	-0.141329	0.0316806	7738	0.00256525	19.8958
GCST90027584	PWY.6588..pyruvate.fermentation.to.acetone	rs61992534	A	G	0.150825	5.32163e-06	-0.144107	0.03166	7738	0.00267027	20.7125
GCST90027584	PWY.6588..pyruvate.fermentation.to.acetone	rs12591343	G	C	0.200701	9.5958e-06	-0.11752	0.0265516	7738	0.0025253	19.5852
GCST90027584	PWY.6588..pyruvate.fermentation.to.acetone	rs1810574	T	C	0.943723	6.77925e-06	0.247719	0.0550425	7738	0.00261071	20.2493
GCST90027584	PWY.6588..pyruvate.fermentation.to.acetone	rs34466545	A	G	0.364594	7.32294e-06	-0.103939	0.0231795	7738	0.00259174	20.1018
GCST90027585	PWY.6590..superpathway.of.Clostridium.acetobutylicum.acidogenic.fermentation	rs13388077	T	C	0.120233	1.37803e-06	0.124899	0.025869	7738	0.0030035	23.3051
GCST90027585	PWY.6590..superpathway.of.Clostridium.acetobutylicum.acidogenic.fermentation	rs17761209	G	C	0.123577	9.70099e-06	-0.112449	0.0254194	7738	0.00252262	19.5644
GCST90027585	PWY.6590..superpathway.of.Clostridium.acetobutylicum.acidogenic.fermentation	rs739677	A	G	0.784264	2.69378e-06	-0.0948002	0.0202008	7738	0.00283803	22.0175
GCST90027585	PWY.6590..superpathway.of.Clostridium.acetobutylicum.acidogenic.fermentation	rs1873661	T	G	0.483485	5.17213e-06	-0.0787015	0.0172679	7738	0.00267729	20.7671
GCST90027585	PWY.6590..superpathway.of.Clostridium.acetobutylicum.acidogenic.fermentation	rs12149972	G	C	0.083861	6.45838e-06	-0.138469	0.0306972	7738	0.00262263	20.3421
GCST90027585	PWY.6590..superpathway.of.Clostridium.acetobutylicum.acidogenic.fermentation	rs5996309	G	A	0.558541	4.37071e-06	-0.0814187	0.017727	7738	0.00271874	21.0895
GCST90027586	PWY.6608..guanosine.nucleotides.degradation.III	rs13396356	T	A	0.0637442	9.38631e-06	0.150242	0.0339083	7738	0.00253072	19.6273
GCST90027586	PWY.6608..guanosine.nucleotides.degradation.III	rs149941003	T	C	0.0794853	8.81566e-06	-0.140433	0.031598	7738	0.00254613	19.7472
GCST90027586	PWY.6608..guanosine.nucleotides.degradation.III	rs271787	C	T	0.100812	1.29314e-07	0.141461	0.0267929	7738	0.00358961	27.8692
GCST90027586	PWY.6608..guanosine.nucleotides.degradation.III	rs78718945	A	G	0.063472	5.10239e-06	-0.157783	0.0345974	7738	0.00268063	20.7931
GCST90027586	PWY.6608..guanosine.nucleotides.degradation.III	rs75292198	T	C	0.101679	3.86517e-06	0.134426	0.0291059	7738	0.00274902	21.3251
GCST90027586	PWY.6608..guanosine.nucleotides.degradation.III	rs17129454	C	G	0.0582692	2.58584e-06	-0.161589	0.0343715	7738	0.00284812	22.096
GCST90027586	PWY.6608..guanosine.nucleotides.degradation.III	rs77117941	G	T	0.0818668	1.20308e-06	0.143427	0.0295413	7738	0.00303705	23.5662
GCST90027586	PWY.6608..guanosine.nucleotides.degradation.III	rs8001568	C	T	0.0931111	7.02996e-06	0.12943	0.0288084	7738	0.00260178	20.1799
GCST90027586	PWY.6608..guanosine.nucleotides.degradation.III	rs12921427	C	A	0.896573	5.20191e-06	-0.124305	0.0272809	7738	0.00267587	20.7561
GCST90027586	PWY.6608..guanosine.nucleotides.degradation.III	rs11079051	C	A	0.590187	4.68747e-06	-0.0755773	0.0165077	7738	0.00270151	20.9555
GCST90027587	PWY.6609..adenine.and.adenosine.salvage.III	rs10496240	G	A	0.205664	1.71999e-06	-0.0961367	0.0200962	7738	0.00294875	22.879
GCST90027587	PWY.6609..adenine.and.adenosine.salvage.III	rs13096036	G	A	0.075084	3.68519e-06	-0.141659	0.0306065	7738	0.00276077	21.4165
GCST90027587	PWY.6609..adenine.and.adenosine.salvage.III	rs28380805	C	G	0.144029	6.12848e-07	-0.113866	0.022832	7738	0.00320389	24.865
GCST90027587	PWY.6609..adenine.and.adenosine.salvage.III	rs497388	C	T	0.910358	6.40911e-06	-0.128934	0.028573	7738	0.00262452	20.3567
GCST90027587	PWY.6609..adenine.and.adenosine.salvage.III	rs10812126	C	T	0.528559	2.43395e-06	-0.0764608	0.0162214	7738	0.00286305	22.2122
GCST90027587	PWY.6609..adenine.and.adenosine.salvage.III	rs67123329	A	G	0.171098	6.39906e-06	0.0979587	0.0217071	7738	0.0026249	20.3597
GCST90027587	PWY.6609..adenine.and.adenosine.salvage.III	rs697368	C	T	0.746264	3.82573e-06	-0.0870071	0.0188301	7738	0.00275155	21.3447
GCST90027587	PWY.6609..adenine.and.adenosine.salvage.III	rs2287554	T	C	0.417357	8.00266e-06	0.0739525	0.0165623	7738	0.00256991	19.9321
GCST90027587	PWY.6609..adenine.and.adenosine.salvage.III	rs78003847	A	G	0.0602869	9.95449e-06	-0.149041	0.0337337	7738	0.00251629	19.5151
GCST90027587	PWY.6609..adenine.and.adenosine.salvage.III	rs17601633	G	A	0.360364	3.467e-06	0.0772012	0.0166346	7738	0.00277581	21.5335
GCST90027587	PWY.6609..adenine.and.adenosine.salvage.III	rs6108110	T	C	0.188376	3.42573e-06	-0.0980389	0.0211132	7738	0.00277876	21.5564
GCST90027587	PWY.6609..adenine.and.adenosine.salvage.III	rs6022157	C	A	0.547714	3.04277e-06	-0.0779399	0.016697	7738	0.00280799	21.7838
GCST90027588	PWY.6612..superpathway.of.tetrahydrofolate.biosynthesis	rs6673038	A	G	0.313532	1.12071e-06	-0.108493	0.0222817	7738	0.00305458	23.7026
GCST90027588	PWY.6612..superpathway.of.tetrahydrofolate.biosynthesis	rs35989200	G	A	0.222871	3.27767e-06	-0.118268	0.0254197	7738	0.00278966	21.6411
GCST90027588	PWY.6612..superpathway.of.tetrahydrofolate.biosynthesis	rs10926878	A	G	0.338946	4.98112e-06	-0.115287	0.0252513	7738	0.00268655	20.8391
GCST90027588	PWY.6612..superpathway.of.tetrahydrofolate.biosynthesis	rs9843052	T	C	0.387586	5.90869e-06	0.0928302	0.020494	7738	0.00264452	20.5123
GCST90027588	PWY.6612..superpathway.of.tetrahydrofolate.biosynthesis	rs4833077	A	T	0.711889	2.65389e-07	-0.11289	0.0219353	7738	0.00341123	26.4796
GCST90027588	PWY.6612..superpathway.of.tetrahydrofolate.biosynthesis	rs2214921	C	T	0.451155	2.89498e-06	0.0970074	0.0207363	7738	0.00282026	21.8793
GCST90027588	PWY.6612..superpathway.of.tetrahydrofolate.biosynthesis	rs17155574	T	C	0.132159	1.35574e-06	0.142716	0.0295391	7738	0.00300753	23.3364
GCST90027588	PWY.6612..superpathway.of.tetrahydrofolate.biosynthesis	rs4732939	A	G	0.182099	5.43981e-06	-0.115704	0.0254458	7738	0.00266487	20.6705
GCST90027588	PWY.6612..superpathway.of.tetrahydrofolate.biosynthesis	rs10815601	A	T	0.243727	2.54506e-06	-0.110624	0.0235147	7738	0.00285204	22.1265
GCST90027588	PWY.6612..superpathway.of.tetrahydrofolate.biosynthesis	rs474884	C	T	0.123855	8.81525e-06	0.135264	0.030435	7738	0.00254615	19.7473
GCST90027588	PWY.6612..superpathway.of.tetrahydrofolate.biosynthesis	rs1027949	G	A	0.145409	4.17463e-07	0.143992	0.0284523	7738	0.00329896	25.6053
GCST90027588	PWY.6612..superpathway.of.tetrahydrofolate.biosynthesis	rs17824268	C	T	0.0775349	2.62792e-08	-0.207447	0.03728	7738	0.00398567	30.9565
GCST90027588	PWY.6612..superpathway.of.tetrahydrofolate.biosynthesis	rs73391984	A	T	0.250723	8.7843e-06	0.103646	0.0233167	7738	0.00254701	19.754
GCST90027588	PWY.6612..superpathway.of.tetrahydrofolate.biosynthesis	rs10402901	C	T	0.195042	6.17415e-06	0.114495	0.0253288	7738	0.00263371	20.4282
GCST90027588	PWY.6612..superpathway.of.tetrahydrofolate.biosynthesis	rs1573442	A	G	0.362316	3.05754e-06	-0.102007	0.0218574	7738	0.00280679	21.7745
GCST90027589	PWY.6628..superpathway.of.L.phenylalanine.biosynthesis	rs12145292	A	C	0.266384	2.09127e-06	-0.120792	0.0254599	7738	0.00290049	22.5035
GCST90027589	PWY.6628..superpathway.of.L.phenylalanine.biosynthesis	rs10157025	C	T	0.302832	7.93155e-06	-0.110868	0.0248192	7738	0.00257211	19.9491
GCST90027589	PWY.6628..superpathway.of.L.phenylalanine.biosynthesis	rs6429177	A	C	0.481367	9.176e-06	-0.100882	0.022743	7738	0.00253629	19.6706
GCST90027589	PWY.6628..superpathway.of.L.phenylalanine.biosynthesis	rs11127546	T	C	0.365695	1.38787e-07	-0.124979	0.0237293	7738	0.00357206	27.7325
GCST90027589	PWY.6628..superpathway.of.L.phenylalanine.biosynthesis	rs904477	A	G	0.349661	9.32234e-07	0.11731	0.0239144	7738	0.00310011	24.057
GCST90027589	PWY.6628..superpathway.of.L.phenylalanine.biosynthesis	rs13125215	C	T	0.621948	2.59883e-07	0.118644	0.0230358	7738	0.00341643	26.5201
GCST90027589	PWY.6628..superpathway.of.L.phenylalanine.biosynthesis	rs4256433	C	T	0.698956	1.31736e-06	0.137098	0.0283429	7738	0.00301462	23.3917
GCST90027589	PWY.6628..superpathway.of.L.phenylalanine.biosynthesis	rs1975618	T	A	0.277249	4.66455e-06	-0.114452	0.024993	7738	0.00270272	20.9649
GCST90027589	PWY.6628..superpathway.of.L.phenylalanine.biosynthesis	rs57864512	C	T	0.0888622	9.5378e-06	-0.183386	0.0414208	7738	0.00252679	19.5968
GCST90027589	PWY.6628..superpathway.of.L.phenylalanine.biosynthesis	rs17777155	G	A	0.115057	1.9389e-06	-0.17509	0.036786	7738	0.00291917	22.6488
GCST90027589	PWY.6628..superpathway.of.L.phenylalanine.biosynthesis	rs7468500	G	A	0.245053	3.50326e-06	-0.120484	0.0259728	7738	0.00277325	21.5135
GCST90027589	PWY.6628..superpathway.of.L.phenylalanine.biosynthesis	rs6539151	C	T	0.0545336	6.84132e-06	-0.225839	0.0502025	7738	0.00260847	20.2319
GCST90027589	PWY.6628..superpathway.of.L.phenylalanine.biosynthesis	rs12974688	C	T	0.779169	6.85753e-06	-0.126722	0.0281725	7738	0.00260788	20.2273
GCST90027589	PWY.6628..superpathway.of.L.phenylalanine.biosynthesis	rs1757700	T	C	0.878115	5.71991e-06	-0.179474	0.0395622	7738	0.00265251	20.5744
GCST90027590	PWY.6629..superpathway.of.L.tryptophan.biosynthesis	rs9678313	A	T	0.383104	8.59164e-06	-0.154784	0.0347838	7738	0.00255246	19.7964
GCST90027590	PWY.6629..superpathway.of.L.tryptophan.biosynthesis	rs140774942	G	C	0.373978	3.8457e-06	0.160978	0.0348471	7738	0.00275027	21.3347
GCST90027590	PWY.6629..superpathway.of.L.tryptophan.biosynthesis	rs2566156	T	A	0.758147	1.00329e-06	-0.211024	0.0431455	7738	0.00308194	23.9156
GCST90027590	PWY.6629..superpathway.of.L.tryptophan.biosynthesis	rs7736485	C	G	0.295741	4.0066e-06	-0.172725	0.037459	7738	0.00274017	21.2562
GCST90027590	PWY.6629..superpathway.of.L.tryptophan.biosynthesis	rs7709170	A	G	0.0844097	2.15128e-06	-0.29571	0.0624037	7738	0.00289351	22.4492
GCST90027590	PWY.6629..superpathway.of.L.tryptophan.biosynthesis	rs947089	T	A	0.509398	6.19592e-06	-0.155912	0.0344969	7738	0.00263284	20.4214
GCST90027590	PWY.6629..superpathway.of.L.tryptophan.biosynthesis	rs79050429	A	G	0.0670987	7.09465e-06	0.330161	0.0735189	7738	0.00259952	20.1623
GCST90027590	PWY.6629..superpathway.of.L.tryptophan.biosynthesis	rs7111149	G	A	0.551132	2.66785e-06	-0.159116	0.0338914	7738	0.00284042	22.036
GCST90027590	PWY.6629..superpathway.of.L.tryptophan.biosynthesis	rs12370008	T	C	0.26683	2.60303e-07	-0.202656	0.0393497	7738	0.00341603	26.517
GCST90027591	PWY.6630..superpathway.of.L.tyrosine.biosynthesis	rs143123895	C	G	0.0527531	5.17755e-06	-0.266546	0.0584856	7738	0.00267703	20.7651
GCST90027591	PWY.6630..superpathway.of.L.tyrosine.biosynthesis	rs11127546	T	C	0.361736	3.03609e-06	-0.122309	0.0261994	7738	0.00280853	21.788
GCST90027591	PWY.6630..superpathway.of.L.tyrosine.biosynthesis	rs904477	A	G	0.350847	7.69873e-07	0.130923	0.0264873	7738	0.00314744	24.4255
GCST90027591	PWY.6630..superpathway.of.L.tyrosine.biosynthesis	rs4376168	T	G	0.791977	7.69964e-06	0.136769	0.030574	7738	0.0025794	20.0059
GCST90027591	PWY.6630..superpathway.of.L.tyrosine.biosynthesis	rs867279	G	A	0.129206	6.3329e-06	-0.172952	0.0383065	7738	0.00262746	20.3796
GCST90027591	PWY.6630..superpathway.of.L.tyrosine.biosynthesis	rs6975001	G	C	0.715942	2.21181e-06	0.131293	0.0277397	7738	0.00288666	22.3959
GCST90027591	PWY.6630..superpathway.of.L.tyrosine.biosynthesis	rs1353171	C	G	0.685913	3.9343e-06	0.126243	0.027356	7738	0.00274465	21.2911
GCST90027591	PWY.6630..superpathway.of.L.tyrosine.biosynthesis	rs80113686	C	G	0.112653	2.43907e-07	-0.212981	0.0412569	7738	0.00343216	26.6427
GCST90027591	PWY.6630..superpathway.of.L.tyrosine.biosynthesis	rs10885766	A	G	0.126579	8.58137e-06	-0.174391	0.0391878	7738	0.00255275	19.7986
GCST90027591	PWY.6630..superpathway.of.L.tyrosine.biosynthesis	rs4631866	A	G	0.511771	6.11386e-06	0.112825	0.024948	7738	0.00263612	20.4469
GCST90027591	PWY.6630..superpathway.of.L.tyrosine.biosynthesis	rs11614816	C	T	0.287475	2.92416e-06	0.129523	0.027699	7738	0.00281779	21.86
GCST90027591	PWY.6630..superpathway.of.L.tyrosine.biosynthesis	rs79754311	C	A	0.0591669	2.6407e-07	-0.274184	0.053266	7738	0.00341247	26.4893
GCST90027591	PWY.6630..superpathway.of.L.tyrosine.biosynthesis	rs8014026	A	T	0.259994	9.74149e-06	0.126787	0.0286664	7738	0.0025216	19.5564
GCST90027591	PWY.6630..superpathway.of.L.tyrosine.biosynthesis	rs8055404	G	A	0.363206	7.53938e-06	0.114493	0.0255687	7738	0.00258457	20.0461
GCST90027591	PWY.6630..superpathway.of.L.tyrosine.biosynthesis	rs2096489	T	C	0.212284	4.9237e-06	-0.140104	0.0306707	7738	0.00268941	20.8613
GCST90027592	PWY66.422..D.galactose.degradation.V..Leloir.pathway.	rs34631763	T	C	0.0525127	3.06572e-06	0.171802	0.0368172	7738	0.00280614	21.7694
GCST90027592	PWY66.422..D.galactose.degradation.V..Leloir.pathway.	rs115981692	A	G	0.052016	5.70543e-06	0.163905	0.036126	7738	0.00265313	20.5792
GCST90027592	PWY66.422..D.galactose.degradation.V..Leloir.pathway.	rs13016472	T	C	0.365216	1.31923e-06	0.0835176	0.017267	7738	0.00301427	23.3889
GCST90027592	PWY66.422..D.galactose.degradation.V..Leloir.pathway.	rs112214356	C	T	0.081092	1.89103e-06	-0.142819	0.0299741	7738	0.00292534	22.6968
GCST90027592	PWY66.422..D.galactose.degradation.V..Leloir.pathway.	rs10026887	T	C	0.309497	2.83301e-06	-0.0821104	0.0175353	7738	0.0028256	21.9208
GCST90027592	PWY66.422..D.galactose.degradation.V..Leloir.pathway.	rs2305506	T	C	0.121951	1.44645e-06	0.125303	0.0260045	7738	0.00299153	23.2119
GCST90027592	PWY66.422..D.galactose.degradation.V..Leloir.pathway.	rs7909120	T	C	0.293419	4.84739e-07	-0.0949316	0.0188646	7738	0.00326195	25.3171
GCST90027592	PWY66.422..D.galactose.degradation.V..Leloir.pathway.	rs2992878	A	G	0.0676559	7.37535e-06	-0.148241	0.0330707	7738	0.00258998	20.0881
GCST90027592	PWY66.422..D.galactose.degradation.V..Leloir.pathway.	rs72731514	C	T	0.056733	5.40028e-06	0.159702	0.03511	7738	0.00266666	20.6845
GCST90027592	PWY66.422..D.galactose.degradation.V..Leloir.pathway.	rs35778179	T	C	0.0884996	5.12222e-06	-0.142549	0.0312626	7738	0.00267967	20.7857
GCST90027592	PWY66.422..D.galactose.degradation.V..Leloir.pathway.	rs3785822	A	G	0.17816	5.03141e-06	0.0962162	0.021084	7738	0.00268408	20.8199
GCST90027592	PWY66.422..D.galactose.degradation.V..Leloir.pathway.	rs12976953	T	C	0.0983496	4.90223e-06	0.128883	0.0282085	7738	0.00269048	20.8697
GCST90027593	PWY.6690..cinnamate.and.3.hydroxycinnamate.degradation.to.2.oxopent.4.enoate	rs3792267	A	G	0.260377	2.00122e-06	-0.18953	0.0398733	7738	0.00291136	22.588
GCST90027593	PWY.6690..cinnamate.and.3.hydroxycinnamate.degradation.to.2.oxopent.4.enoate	rs17035816	G	A	0.0550314	9.78416e-06	0.338356	0.0765185	7738	0.00252052	19.5481
GCST90027593	PWY.6690..cinnamate.and.3.hydroxycinnamate.degradation.to.2.oxopent.4.enoate	rs12670364	T	C	0.0808324	7.76003e-06	-0.291836	0.0652628	7738	0.00257748	19.9909
GCST90027593	PWY.6690..cinnamate.and.3.hydroxycinnamate.degradation.to.2.oxopent.4.enoate	rs2968511	G	C	0.328169	9.22444e-06	0.168322	0.0379565	7738	0.002535	19.6606
GCST90027593	PWY.6690..cinnamate.and.3.hydroxycinnamate.degradation.to.2.oxopent.4.enoate	rs4768167	T	G	0.830486	3.37117e-06	-0.216629	0.0466189	7738	0.00278272	21.5872
GCST90027593	PWY.6690..cinnamate.and.3.hydroxycinnamate.degradation.to.2.oxopent.4.enoate	rs10219622	A	G	0.576107	8.90441e-06	0.161208	0.0362902	7738	0.00254367	19.728
GCST90027593	PWY.6690..cinnamate.and.3.hydroxycinnamate.degradation.to.2.oxopent.4.enoate	rs2300878	G	A	0.464045	6.61636e-06	-0.155994	0.0346216	7738	0.00261669	20.2958
GCST90027593	PWY.6690..cinnamate.and.3.hydroxycinnamate.degradation.to.2.oxopent.4.enoate	rs72995495	C	A	0.0530657	7.16211e-06	-0.393466	0.0876548	7738	0.0025972	20.1442
GCST90027594	PWY.6700..queuosine.biosynthesis	rs2737651	C	T	0.157242	6.49895e-06	-0.0980458	0.0217422	7738	0.00262109	20.3301
GCST90027594	PWY.6700..queuosine.biosynthesis	rs7589782	T	C	0.0783541	1.37381e-06	0.142071	0.0294218	7738	0.00300426	23.311
GCST90027594	PWY.6700..queuosine.biosynthesis	rs55754265	T	C	0.15878	3.02228e-06	-0.100856	0.0215998	7738	0.00280965	21.7967
GCST90027594	PWY.6700..queuosine.biosynthesis	rs9999406	C	T	0.534069	9.88721e-06	-0.072055	0.0163034	7738	0.00251795	19.528
GCST90027594	PWY.6700..queuosine.biosynthesis	rs7700033	A	C	0.589881	2.39337e-06	0.0750812	0.0159171	7738	0.0028672	22.2444
GCST90027594	PWY.6700..queuosine.biosynthesis	rs28404149	A	G	0.145481	6.06761e-06	0.100438	0.0222011	7738	0.00263799	20.4615
GCST90027594	PWY.6700..queuosine.biosynthesis	rs7377535	A	G	0.630164	3.82839e-06	-0.0757541	0.0163952	7738	0.00275138	21.3434
GCST90027594	PWY.6700..queuosine.biosynthesis	rs12515947	A	G	0.547945	4.57572e-07	-0.0791647	0.015697	7738	0.00327624	25.4283
GCST90027594	PWY.6700..queuosine.biosynthesis	rs1926092	T	G	0.204261	6.62499e-06	0.0940404	0.0208728	7738	0.00261637	20.2933
GCST90027594	PWY.6700..queuosine.biosynthesis	rs1408765	G	A	0.573549	6.13237e-06	-0.0729139	0.0161251	7738	0.00263538	20.4412
GCST90027594	PWY.6700..queuosine.biosynthesis	rs7997810	A	G	0.358779	1.76938e-06	0.0785295	0.0164352	7738	0.00294176	22.8246
GCST90027594	PWY.6700..queuosine.biosynthesis	rs62072709	C	T	0.731824	1.31244e-07	-0.0979355	0.0185586	7738	0.00358593	27.8406
GCST90027594	PWY.6700..queuosine.biosynthesis	rs7222575	C	A	0.234593	1.83306e-06	-0.0891912	0.0186944	7738	0.00293303	22.7566
GCST90027594	PWY.6700..queuosine.biosynthesis	rs149854766	T	A	0.06483	8.20844e-06	-0.153124	0.0343351	7738	0.00256367	19.8836
GCST90027594	PWY.6700..queuosine.biosynthesis	rs79257569	A	G	0.122217	7.70124e-06	-0.115155	0.0257427	7738	0.00257935	20.0055
GCST90027594	PWY.6700..queuosine.biosynthesis	rs6043418	A	G	0.557127	8.53872e-07	0.0789955	0.0160474	7738	0.00312182	24.2261
GCST90027595	PWY.6703..preQ0.biosynthesis	rs72831788	C	T	0.104502	3.27762e-06	-0.124701	0.0268023	7738	0.00278966	21.6412
GCST90027595	PWY.6703..preQ0.biosynthesis	rs1263629	G	A	0.181109	1.03341e-06	0.102583	0.0209988	7738	0.00307463	23.8587
GCST90027595	PWY.6703..preQ0.biosynthesis	rs6804526	G	A	0.170134	2.12157e-07	0.111336	0.0214587	7738	0.00346675	26.9121
GCST90027595	PWY.6703..preQ0.biosynthesis	rs4958506	A	G	0.398147	9.04865e-06	0.0743958	0.0167606	7738	0.00253972	19.6973
GCST90027595	PWY.6703..preQ0.biosynthesis	rs17366560	T	A	0.0610195	2.46702e-06	0.166331	0.0353081	7738	0.00285972	22.1862
GCST90027595	PWY.6703..preQ0.biosynthesis	rs505128	C	T	0.353709	4.21044e-06	-0.0773775	0.0168186	7738	0.00272794	21.1611
GCST90027595	PWY.6703..preQ0.biosynthesis	rs8004382	G	A	0.500582	5.95796e-06	-0.0730588	0.0161353	7738	0.00264248	20.4964
GCST90027595	PWY.6703..preQ0.biosynthesis	rs17829116	A	G	0.183342	2.17391e-06	0.102872	0.0217188	7738	0.00289093	22.4291
GCST90027595	PWY.6703..preQ0.biosynthesis	rs4777110	T	C	0.580713	5.48306e-06	-0.0744398	0.0163769	7738	0.00266292	20.6553
GCST90027595	PWY.6703..preQ0.biosynthesis	rs28535665	C	G	0.0586869	9.02029e-06	0.164286	0.0370063	7738	0.0025405	19.7033
GCST90027595	PWY.6703..preQ0.biosynthesis	rs78048823	T	C	0.0535389	2.74106e-07	0.184638	0.0359187	7738	0.00340322	26.4172
GCST90027595	PWY.6703..preQ0.biosynthesis	rs11657406	T	G	0.166064	2.78327e-06	-0.101907	0.0217462	7738	0.00282997	21.9548
GCST90027595	PWY.6703..preQ0.biosynthesis	rs225280	T	C	0.816592	2.16589e-06	0.0991598	0.0209317	7738	0.00289184	22.4362
GCST90027595	PWY.6703..preQ0.biosynthesis	rs384592	G	A	0.137667	1.95471e-06	0.122537	0.0257537	7738	0.00291716	22.6332
GCST90027595	PWY.6703..preQ0.biosynthesis	rs75314238	T	A	0.0560906	3.56124e-06	-0.167732	0.0361844	7738	0.0027692	21.482
GCST90027596	PWY.6708..ubiquinol.8.biosynthesis..prokaryotic.	rs10172221	C	G	0.131808	7.21538e-06	0.16467	0.0366974	7738	0.00259537	20.1301
GCST90027596	PWY.6708..ubiquinol.8.biosynthesis..prokaryotic.	rs17275498	C	A	0.111832	1.38371e-07	0.212949	0.0404278	7738	0.0035728	27.7383
GCST90027596	PWY.6708..ubiquinol.8.biosynthesis..prokaryotic.	rs2636908	C	T	0.0742992	3.56598e-06	0.251351	0.0542266	7738	0.00276888	21.4795
GCST90027596	PWY.6708..ubiquinol.8.biosynthesis..prokaryotic.	rs10463321	G	T	0.204651	7.85438e-06	0.137597	0.0307884	7738	0.00257451	19.9678
GCST90027596	PWY.6708..ubiquinol.8.biosynthesis..prokaryotic.	rs1624064	C	T	0.43238	1.13297e-06	-0.123387	0.0253516	7738	0.00305189	23.6817
GCST90027596	PWY.6708..ubiquinol.8.biosynthesis..prokaryotic.	rs12209400	T	C	0.229876	5.16652e-06	0.134862	0.0295886	7738	0.00267755	20.7692
GCST90027596	PWY.6708..ubiquinol.8.biosynthesis..prokaryotic.	rs12550124	T	A	0.87165	3.37799e-06	-0.172648	0.0371575	7738	0.00278222	21.5833
GCST90027596	PWY.6708..ubiquinol.8.biosynthesis..prokaryotic.	rs3750879	A	C	0.34867	2.95615e-06	0.124154	0.0265636	7738	0.00281511	21.8392
GCST90027596	PWY.6708..ubiquinol.8.biosynthesis..prokaryotic.	rs7979020	T	C	0.138499	9.41425e-06	-0.162825	0.0367534	7738	0.00252999	19.6217
GCST90027596	PWY.6708..ubiquinol.8.biosynthesis..prokaryotic.	rs9316763	C	T	0.465734	9.5742e-06	0.114104	0.0257771	7738	0.00252585	19.5895
GCST90027596	PWY.6708..ubiquinol.8.biosynthesis..prokaryotic.	rs113976504	T	C	0.0528666	4.7012e-06	-0.272739	0.05958	7738	0.00270079	20.9499
GCST90027597	PWY.6731..starch.degradation.III	rs61759306	T	C	0.213506	8.02818e-07	0.217252	0.0440255	7738	0.00313708	24.3448
GCST90027597	PWY.6731..starch.degradation.III	rs1030115	G	A	0.110073	3.53058e-06	-0.28897	0.0623148	7738	0.00277133	21.4986
GCST90027597	PWY.6731..starch.degradation.III	rs55922034	A	C	0.0555627	2.51609e-06	-0.408074	0.0866984	7738	0.00285486	22.1484
GCST90027597	PWY.6731..starch.degradation.III	rs2368650	G	A	0.282367	5.48831e-06	-0.211497	0.0465319	7738	0.00266268	20.6535
GCST90027597	PWY.6731..starch.degradation.III	rs7665599	T	C	0.619459	7.59935e-06	0.163375	0.0364988	7738	0.00258263	20.0309
GCST90027597	PWY.6731..starch.degradation.III	rs4440429	T	C	0.639166	5.47773e-06	-0.163017	0.0358625	7738	0.00266316	20.6572
GCST90027597	PWY.6731..starch.degradation.III	rs2166227	C	G	0.324661	6.44239e-06	-0.166098	0.0368181	7738	0.00262324	20.3468
GCST90027597	PWY.6731..starch.degradation.III	rs12805373	A	T	0.263748	7.49553e-07	-0.199203	0.0402589	7738	0.00315406	24.477
GCST90027597	PWY.6731..starch.degradation.III	rs457793	G	C	0.663735	7.99139e-06	0.162257	0.0363365	7738	0.00257026	19.9348
GCST90027597	PWY.6731..starch.degradation.III	rs10152918	A	G	0.417203	1.30214e-06	-0.204226	0.0422004	7738	0.0030175	23.414
GCST90027597	PWY.6731..starch.degradation.III	rs2602034	A	G	0.605644	9.04598e-06	0.159327	0.0358941	7738	0.0025398	19.6979
GCST90027597	PWY.6731..starch.degradation.III	rs3744580	C	T	0.711299	6.74628e-06	-0.173951	0.0386425	7738	0.00261191	20.2586
GCST90027597	PWY.6731..starch.degradation.III	rs806925	G	A	0.657926	4.14725e-06	-0.171177	0.0371812	7738	0.00273167	21.1901
GCST90027598	PWY.6737..starch.degradation.V	rs9286959	A	T	0.438789	6.597e-06	0.0754898	0.0167521	7738	0.00261741	20.3014
GCST90027598	PWY.6737..starch.degradation.V	rs7083857	G	C	0.0977465	7.85838e-07	0.136762	0.027691	7738	0.00314236	24.386
GCST90027598	PWY.6737..starch.degradation.V	rs12420239	A	G	0.186183	6.1495e-06	-0.095626	0.0211507	7738	0.00263469	20.4358
GCST90027598	PWY.6737..starch.degradation.V	rs12868026	A	G	0.0538899	5.32819e-06	0.16246	0.0356944	7738	0.00266997	20.7102
GCST90027598	PWY.6737..starch.degradation.V	rs10145503	G	A	0.198072	4.85065e-06	-0.0925465	0.0202458	7738	0.00269309	20.89
GCST90027598	PWY.6737..starch.degradation.V	rs6035564	A	G	0.541036	1.52562e-06	-0.077432	0.0161053	7738	0.00297836	23.1094
GCST90027599	PWY.6823..molybdenum.cofactor.biosynthesis	rs1338762	A	G	0.269544	1.46851e-06	-0.1778	0.0369226	7738	0.00298779	23.1828
GCST90027599	PWY.6823..molybdenum.cofactor.biosynthesis	rs555615	C	T	0.832982	9.19637e-06	-0.1961	0.044214	7738	0.00253575	19.6664
GCST90027599	PWY.6823..molybdenum.cofactor.biosynthesis	rs16829385	T	A	0.130089	4.08539e-06	0.219994	0.0477522	7738	0.00273537	21.2189
GCST90027599	PWY.6823..molybdenum.cofactor.biosynthesis	rs10015390	A	G	0.703903	2.38525e-06	0.170577	0.0361569	7738	0.00286804	22.2509
GCST90027599	PWY.6823..molybdenum.cofactor.biosynthesis	rs11741434	G	A	0.19109	5.21214e-06	-0.215369	0.0472708	7738	0.00267539	20.7523
GCST90027599	PWY.6823..molybdenum.cofactor.biosynthesis	rs62523849	C	T	0.0576356	2.68143e-06	0.331454	0.0706149	7738	0.00283916	22.0263
GCST90027599	PWY.6823..molybdenum.cofactor.biosynthesis	rs61861701	G	A	0.260402	3.55204e-06	0.177643	0.0383181	7738	0.00276984	21.487
GCST90027599	PWY.6823..molybdenum.cofactor.biosynthesis	rs1325380	C	T	0.2499	6.57271e-06	0.174981	0.0388236	7738	0.00261832	20.3085
GCST90027599	PWY.6823..molybdenum.cofactor.biosynthesis	rs2292862	T	A	0.653047	4.72428e-06	-0.169423	0.0370187	7738	0.00269959	20.9405
GCST90027599	PWY.6823..molybdenum.cofactor.biosynthesis	rs11867310	G	A	0.528379	5.55185e-06	-0.150271	0.0330792	7738	0.00265985	20.6315
GCST90027599	PWY.6823..molybdenum.cofactor.biosynthesis	rs6081036	T	C	0.67576	2.51677e-07	0.174781	0.0338956	7738	0.00342439	26.5821
GCST90027600	PWY.6891..thiazole.biosynthesis.II..Bacillus.	rs7426276	A	G	0.149009	1.90183e-06	-0.177033	0.0371638	7738	0.00292393	22.6859
GCST90027600	PWY.6891..thiazole.biosynthesis.II..Bacillus.	rs28887188	A	G	0.0962352	4.73514e-07	0.223486	0.044371	7738	0.00326776	25.3622
GCST90027600	PWY.6891..thiazole.biosynthesis.II..Bacillus.	rs111370608	T	G	0.105908	8.41749e-06	-0.20102	0.0451296	7738	0.00255749	19.8355
GCST90027600	PWY.6891..thiazole.biosynthesis.II..Bacillus.	rs6858961	C	A	0.150873	2.70916e-06	0.17174	0.0366048	7738	0.00283663	22.0066
GCST90027600	PWY.6891..thiazole.biosynthesis.II..Bacillus.	rs9401616	G	A	0.151187	9.22845e-06	0.16293	0.0367414	7738	0.00253489	19.6597
GCST90027600	PWY.6891..thiazole.biosynthesis.II..Bacillus.	rs7784347	C	T	0.0648245	2.98917e-07	-0.271457	0.0529763	7738	0.00338174	26.2499
GCST90027600	PWY.6891..thiazole.biosynthesis.II..Bacillus.	rs78206502	A	G	0.0581025	4.24198e-06	0.272518	0.0592538	7738	0.00272611	21.1468
GCST90027600	PWY.6891..thiazole.biosynthesis.II..Bacillus.	rs62465767	A	G	0.0934947	4.95654e-06	0.208553	0.0456689	7738	0.00268777	20.8486
GCST90027600	PWY.6891..thiazole.biosynthesis.II..Bacillus.	rs17147827	T	G	0.130363	7.62932e-06	0.174951	0.0390923	7738	0.00258166	20.0234
GCST90027600	PWY.6891..thiazole.biosynthesis.II..Bacillus.	rs4716795	C	T	0.871149	9.49492e-06	0.177781	0.0401458	7738	0.0025279	19.6054
GCST90027600	PWY.6891..thiazole.biosynthesis.II..Bacillus.	rs2065501	C	A	0.68472	6.10272e-07	0.156778	0.0314314	7738	0.00320493	24.8731
GCST90027600	PWY.6891..thiazole.biosynthesis.II..Bacillus.	rs7925466	C	A	0.411115	4.02939e-06	-0.123848	0.026866	7738	0.00273877	21.2453
GCST90027600	PWY.6891..thiazole.biosynthesis.II..Bacillus.	rs147068992	A	G	0.0564545	4.0045e-06	-0.263745	0.0571971	7738	0.0027403	21.2572
GCST90027600	PWY.6891..thiazole.biosynthesis.II..Bacillus.	rs1950861	A	G	0.255127	9.76193e-06	-0.131261	0.0296811	7738	0.00252108	19.5524
GCST90027600	PWY.6891..thiazole.biosynthesis.II..Bacillus.	rs73379542	C	G	0.0510867	2.14113e-06	-0.279654	0.0590033	7738	0.00289468	22.4583
GCST90027600	PWY.6891..thiazole.biosynthesis.II..Bacillus.	rs4968174	C	A	0.535432	4.38253e-06	-0.128802	0.0280471	7738	0.00271808	21.0844
GCST90027600	PWY.6891..thiazole.biosynthesis.II..Bacillus.	rs67469682	A	T	0.375479	1.04816e-06	0.132353	0.0271084	7738	0.00307113	23.8314
GCST90027601	PWY.6892..thiazole.biosynthesis.I..E..coli.	rs2999900	C	T	0.838843	6.26564e-07	0.137782	0.0276513	7738	0.00319841	24.8223
GCST90027601	PWY.6892..thiazole.biosynthesis.I..E..coli.	rs4949324	A	G	0.654959	7.00528e-06	-0.0972248	0.0216366	7738	0.00260264	20.1866
GCST90027601	PWY.6892..thiazole.biosynthesis.I..E..coli.	rs80055047	A	G	0.0520199	7.18172e-06	0.211269	0.0470718	7738	0.00259652	20.139
GCST90027601	PWY.6892..thiazole.biosynthesis.I..E..coli.	rs7784347	C	T	0.0680514	2.35116e-07	-0.2046	0.0395806	7738	0.00344127	26.7136
GCST90027601	PWY.6892..thiazole.biosynthesis.I..E..coli.	rs7989592	C	T	0.0541374	7.82809e-06	-0.201336	0.0450433	7738	0.00257534	19.9742
GCST90027601	PWY.6892..thiazole.biosynthesis.I..E..coli.	rs75042717	C	A	0.160967	8.8127e-06	0.120678	0.0271527	7738	0.00254622	19.7478
GCST90027602	PWY.6897..thiamin.salvage.II	rs10006164	A	G	0.344209	5.70276e-06	-0.0805101	0.0177448	7738	0.00265325	20.5801
GCST90027602	PWY.6897..thiamin.salvage.II	rs4374638	C	T	0.652683	9.61064e-06	0.0768675	0.0173682	7738	0.00252492	19.5822
GCST90027602	PWY.6897..thiamin.salvage.II	rs479744	T	G	0.198548	4.90989e-06	-0.0947483	0.020739	7738	0.0026901	20.8667
GCST90027602	PWY.6897..thiamin.salvage.II	rs118155381	C	T	0.258527	6.9077e-07	-0.0923154	0.0185972	7738	0.00317427	24.6343
GCST90027602	PWY.6897..thiamin.salvage.II	rs74949229	A	G	0.0938701	3.88991e-06	-0.1307	0.0283073	7738	0.00274745	21.3128
GCST90027602	PWY.6897..thiamin.salvage.II	rs2461882	C	T	0.0962862	5.78336e-06	-0.124633	0.0274876	7738	0.0026498	20.5533
GCST90027602	PWY.6897..thiamin.salvage.II	rs7904867	C	T	0.377571	6.95231e-06	-0.0760521	0.0169187	7738	0.00260451	20.2011
GCST90027602	PWY.6897..thiamin.salvage.II	rs10777971	G	T	0.359993	3.82106e-06	0.0780639	0.0168937	7738	0.00275185	21.3471
GCST90027602	PWY.6897..thiamin.salvage.II	rs1968451	C	T	0.680575	6.22773e-06	0.0898689	0.0198891	7738	0.00263158	20.4116
GCST90027602	PWY.6897..thiamin.salvage.II	rs12463196	T	G	0.0749451	7.31691e-06	-0.138008	0.0307762	7738	0.00259194	20.1033
GCST90027602	PWY.6897..thiamin.salvage.II	rs2424026	G	A	0.255692	5.66014e-06	-0.0847065	0.0186631	7738	0.0026551	20.5945
GCST90027602	PWY.6897..thiamin.salvage.II	rs28359554	C	T	0.08728	1.7139e-06	0.143385	0.0299685	7738	0.00294962	22.8858
GCST90027603	PWY.6901..superpathway.of.glucose.and.xylose.degradation	rs73001914	G	A	0.182174	2.61177e-06	-0.102206	0.0217496	7738	0.00284566	22.0768
GCST90027603	PWY.6901..superpathway.of.glucose.and.xylose.degradation	rs114537104	G	T	0.0602476	1.44259e-06	0.170007	0.0352783	7738	0.00299219	23.217
GCST90027603	PWY.6901..superpathway.of.glucose.and.xylose.degradation	rs6596989	G	A	0.660013	2.07732e-06	-0.0852001	0.0179529	7738	0.00290215	22.5164
GCST90027603	PWY.6901..superpathway.of.glucose.and.xylose.degradation	rs145761301	A	G	0.106563	7.89121e-06	0.125022	0.0279809	7738	0.00257336	19.9589
GCST90027603	PWY.6901..superpathway.of.glucose.and.xylose.degradation	rs6967058	C	T	0.909252	9.66085e-06	-0.141853	0.03206	7738	0.00252364	19.5723
GCST90027604	PWY.6969..TCA.cycle.V..2.oxoglutarate.ferredoxin.oxidoreductase.	rs12725757	T	A	0.351997	4.84641e-06	0.0778646	0.0170332	7738	0.0026933	20.8916
GCST90027604	PWY.6969..TCA.cycle.V..2.oxoglutarate.ferredoxin.oxidoreductase.	rs61156349	A	T	0.206393	8.15921e-06	0.0898115	0.0201328	7738	0.00256515	19.895
GCST90027604	PWY.6969..TCA.cycle.V..2.oxoglutarate.ferredoxin.oxidoreductase.	rs13088151	G	A	0.228659	9.38642e-06	-0.0896934	0.020243	7738	0.00253072	19.6273
GCST90027604	PWY.6969..TCA.cycle.V..2.oxoglutarate.ferredoxin.oxidoreductase.	rs78769049	T	C	0.0931358	7.19062e-07	-0.149104	0.0300847	7738	0.00316434	24.557
GCST90027604	PWY.6969..TCA.cycle.V..2.oxoglutarate.ferredoxin.oxidoreductase.	rs367274	T	C	0.453617	1.71752e-06	0.0793277	0.0165815	7738	0.0029491	22.8817
GCST90027604	PWY.6969..TCA.cycle.V..2.oxoglutarate.ferredoxin.oxidoreductase.	rs802718	A	G	0.91036	7.26391e-06	0.128723	0.0286956	7738	0.00259373	20.1172
GCST90027604	PWY.6969..TCA.cycle.V..2.oxoglutarate.ferredoxin.oxidoreductase.	rs10951836	G	A	0.352364	9.66322e-06	0.078213	0.0176769	7738	0.00252358	19.5718
GCST90027604	PWY.6969..TCA.cycle.V..2.oxoglutarate.ferredoxin.oxidoreductase.	rs17866154	C	G	0.102088	8.04606e-07	-0.133938	0.0271446	7738	0.00313652	24.3405
GCST90027604	PWY.6969..TCA.cycle.V..2.oxoglutarate.ferredoxin.oxidoreductase.	rs62522935	C	T	0.124382	3.29738e-06	0.116933	0.0251395	7738	0.00278818	21.6296
GCST90027604	PWY.6969..TCA.cycle.V..2.oxoglutarate.ferredoxin.oxidoreductase.	rs1915542	T	A	0.673225	1.52087e-06	0.085412	0.0177628	7738	0.00297913	23.1154
GCST90027604	PWY.6969..TCA.cycle.V..2.oxoglutarate.ferredoxin.oxidoreductase.	rs11141287	T	C	0.444959	5.40041e-06	0.0758855	0.0166833	7738	0.00266666	20.6844
GCST90027604	PWY.6969..TCA.cycle.V..2.oxoglutarate.ferredoxin.oxidoreductase.	rs71507551	G	A	0.0742318	8.36687e-06	-0.141788	0.0318225	7738	0.00255897	19.847
GCST90027604	PWY.6969..TCA.cycle.V..2.oxoglutarate.ferredoxin.oxidoreductase.	rs9300960	T	C	0.161616	4.15137e-06	-0.110748	0.0240566	7738	0.00273142	21.1882
GCST90027604	PWY.6969..TCA.cycle.V..2.oxoglutarate.ferredoxin.oxidoreductase.	rs1423084	G	A	0.787237	6.42623e-06	-0.0915073	0.0202815	7738	0.00262386	20.3516
GCST90027605	PWY.7003..glycerol.degradation.to.butanol	rs17012363	C	T	0.179061	9.5688e-06	0.128966	0.0291337	7738	0.00252599	19.5906
GCST90027605	PWY.7003..glycerol.degradation.to.butanol	rs16855891	A	G	0.0504159	6.84936e-06	0.22891	0.0508879	7738	0.00260818	20.2296
GCST90027605	PWY.7003..glycerol.degradation.to.butanol	rs3116216	C	T	0.0710938	9.35491e-06	0.195371	0.0440862	7738	0.00253155	19.6337
GCST90027605	PWY.7003..glycerol.degradation.to.butanol	rs7623244	C	A	0.186152	9.00897e-06	0.132253	0.0297889	7738	0.0025408	19.7057
GCST90027605	PWY.7003..glycerol.degradation.to.butanol	rs75209389	T	G	0.177712	9.80568e-06	0.131907	0.0298337	7738	0.00251999	19.5439
GCST90027605	PWY.7003..glycerol.degradation.to.butanol	rs72697193	T	C	0.114898	2.1134e-06	0.170761	0.0360083	7738	0.0028979	22.4833
GCST90027605	PWY.7003..glycerol.degradation.to.butanol	rs10017115	C	T	0.590678	6.14881e-06	0.104115	0.0230282	7738	0.00263472	20.436
GCST90027605	PWY.7003..glycerol.degradation.to.butanol	rs971716	C	T	0.596692	6.02787e-06	0.103798	0.0229367	7738	0.00263961	20.474
GCST90027605	PWY.7003..glycerol.degradation.to.butanol	rs72958820	T	C	0.0540698	3.06595e-07	0.260292	0.0508447	7738	0.00337545	26.2009
GCST90027605	PWY.7003..glycerol.degradation.to.butanol	rs56059900	A	G	0.0657438	6.87952e-08	0.245734	0.0455545	7738	0.00374636	29.0908
GCST90027605	PWY.7003..glycerol.degradation.to.butanol	rs7859760	G	T	0.517931	7.05771e-06	0.100406	0.0223525	7738	0.00260081	20.1723
GCST90027605	PWY.7003..glycerol.degradation.to.butanol	rs62571693	C	T	0.181501	5.2769e-06	-0.131848	0.0289556	7738	0.00267235	20.7287
GCST90027605	PWY.7003..glycerol.degradation.to.butanol	rs34386657	T	C	0.0526102	6.28945e-06	0.229411	0.0507949	7738	0.00262915	20.3928
GCST90027605	PWY.7003..glycerol.degradation.to.butanol	rs35531472	T	C	0.107296	9.80614e-06	-0.161366	0.0364965	7738	0.00251997	19.5438
GCST90027605	PWY.7003..glycerol.degradation.to.butanol	rs4892167	C	G	0.351073	7.62688e-06	0.120951	0.0270257	7738	0.00258174	20.024
GCST90027606	PWY.7013..L.1.2.propanediol.degradation	rs4670011	C	T	0.306786	8.56796e-06	-0.174663	0.0392458	7738	0.00255314	19.8016
GCST90027606	PWY.7013..L.1.2.propanediol.degradation	rs114990902	A	G	0.0560495	2.74333e-07	-0.438592	0.0853246	7738	0.00340302	26.4156
GCST90027606	PWY.7013..L.1.2.propanediol.degradation	rs4309681	A	G	0.176173	8.46083e-06	0.205271	0.0460954	7738	0.00255623	19.8257
GCST90027606	PWY.7013..L.1.2.propanediol.degradation	rs72829142	G	A	0.0601282	3.30962e-06	0.348734	0.0749867	7738	0.00278726	21.6225
GCST90027606	PWY.7013..L.1.2.propanediol.degradation	rs1555643	A	G	0.173527	4.77789e-06	0.208976	0.0456846	7738	0.00269681	20.9189
GCST90027606	PWY.7013..L.1.2.propanediol.degradation	rs1381664	T	A	0.448913	4.02817e-06	0.168754	0.0366068	7738	0.00273885	21.2459
GCST90027606	PWY.7013..L.1.2.propanediol.degradation	rs2145794	A	T	0.824855	8.67115e-06	0.221571	0.0498146	7738	0.0025502	19.7788
GCST90027606	PWY.7013..L.1.2.propanediol.degradation	rs7303969	T	C	0.832051	4.48964e-06	-0.211976	0.0462092	7738	0.00271213	21.0381
GCST90027606	PWY.7013..L.1.2.propanediol.degradation	rs12440220	G	A	0.40746	5.57162e-06	-0.166608	0.0366815	7738	0.00265897	20.6247
GCST90027606	PWY.7013..L.1.2.propanediol.degradation	rs9933327	G	A	0.305774	2.80056e-06	0.194255	0.0414638	7738	0.00282844	21.9429
GCST90027606	PWY.7013..L.1.2.propanediol.degradation	rs1589199	G	A	0.0833208	2.74608e-06	-0.303254	0.0646742	7738	0.00283329	21.9806
GCST90027607	PWY.7187..pyrimidine.deoxyribonucleotides.de.novo.biosynthesis.II	rs75789763	A	G	0.0562994	5.92861e-06	-0.167187	0.0369155	7738	0.00264369	20.5058
GCST90027607	PWY.7187..pyrimidine.deoxyribonucleotides.de.novo.biosynthesis.II	rs10951564	A	G	0.472108	3.26535e-06	0.076022	0.0163369	7738	0.00279058	21.6484
GCST90027607	PWY.7187..pyrimidine.deoxyribonucleotides.de.novo.biosynthesis.II	rs10448112	G	A	0.204444	9.51873e-06	0.0915049	0.0206659	7738	0.00252728	19.6006
GCST90027607	PWY.7187..pyrimidine.deoxyribonucleotides.de.novo.biosynthesis.II	rs72784665	T	G	0.0683811	6.12813e-06	0.157671	0.0348681	7738	0.00263555	20.4425
GCST90027607	PWY.7187..pyrimidine.deoxyribonucleotides.de.novo.biosynthesis.II	rs2481967	G	T	0.809301	9.27511e-06	0.0926418	0.0208963	7738	0.00253365	19.6501
GCST90027607	PWY.7187..pyrimidine.deoxyribonucleotides.de.novo.biosynthesis.II	rs4791333	G	A	0.871297	5.04997e-06	-0.110765	0.0242762	7738	0.00268317	20.8129
GCST90027607	PWY.7187..pyrimidine.deoxyribonucleotides.de.novo.biosynthesis.II	rs17790609	C	T	0.0808749	6.95136e-06	0.135454	0.0301332	7738	0.00260454	20.2014
GCST90027607	PWY.7187..pyrimidine.deoxyribonucleotides.de.novo.biosynthesis.II	rs73176879	G	A	0.116772	6.4284e-06	-0.114949	0.0254776	7738	0.00262378	20.351
GCST90027608	PWY.7196..superpathway.of.pyrimidine.ribonucleosides.salvage	rs9463067	T	C	0.380643	5.10742e-06	-0.079069	0.0173385	7738	0.00268039	20.7912
GCST90027608	PWY.7196..superpathway.of.pyrimidine.ribonucleosides.salvage	rs4074922	G	C	0.197105	8.66643e-06	-0.108992	0.0245035	7738	0.00255033	19.7798
GCST90027608	PWY.7196..superpathway.of.pyrimidine.ribonucleosides.salvage	rs1686648	A	G	0.793975	7.17937e-06	-0.0931009	0.020743	7738	0.00259661	20.1396
GCST90027608	PWY.7196..superpathway.of.pyrimidine.ribonucleosides.salvage	rs8033436	A	G	0.477528	4.20128e-06	0.0784407	0.017048	7738	0.00272848	21.1653
GCST90027608	PWY.7196..superpathway.of.pyrimidine.ribonucleosides.salvage	rs55794976	T	C	0.0635357	1.3108e-06	-0.169662	0.0350678	7738	0.00301586	23.4013
GCST90027608	PWY.7196..superpathway.of.pyrimidine.ribonucleosides.salvage	rs6503292	G	A	0.629819	3.23533e-06	-0.0827317	0.0177716	7738	0.00279286	21.6661
GCST90027608	PWY.7196..superpathway.of.pyrimidine.ribonucleosides.salvage	rs662934	G	A	0.777175	4.27384e-06	0.101673	0.0221143	7738	0.00272426	21.1325
GCST90027609	PWY.7197..pyrimidine.deoxyribonucleotide.phosphorylation	rs12035670	T	C	0.332632	3.86603e-06	-0.0818521	0.0177228	7738	0.00274897	21.3246
GCST90027609	PWY.7197..pyrimidine.deoxyribonucleotide.phosphorylation	rs16830066	A	G	0.101692	6.48631e-06	0.122475	0.027157	7738	0.00262157	20.3338
GCST90027609	PWY.7197..pyrimidine.deoxyribonucleotide.phosphorylation	rs74671141	C	G	0.104316	4.93699e-06	-0.122167	0.0267473	7738	0.00268874	20.8562
GCST90027609	PWY.7197..pyrimidine.deoxyribonucleotide.phosphorylation	rs3113463	T	G	0.507096	1.3972e-07	0.0875069	0.0166185	7738	0.0035704	27.7196
GCST90027609	PWY.7197..pyrimidine.deoxyribonucleotide.phosphorylation	rs11259346	T	C	0.325841	3.03053e-06	0.0821155	0.0175884	7738	0.00280898	21.7915
GCST90027609	PWY.7197..pyrimidine.deoxyribonucleotide.phosphorylation	rs4962365	C	T	0.0620419	4.46323e-06	0.158259	0.0344899	7738	0.00271358	21.0494
GCST90027609	PWY.7197..pyrimidine.deoxyribonucleotide.phosphorylation	rs117176738	G	A	0.0555993	7.58496e-06	-0.160576	0.0358702	7738	0.00258309	20.0346
GCST90027609	PWY.7197..pyrimidine.deoxyribonucleotide.phosphorylation	rs8079105	T	C	0.50919	2.22757e-06	0.0793471	0.0167696	7738	0.00288491	22.3823
GCST90027609	PWY.7197..pyrimidine.deoxyribonucleotide.phosphorylation	rs8097750	A	G	0.144967	7.87079e-06	0.10297	0.0230428	7738	0.002574	19.9638
GCST90027610	PWY.7198..pyrimidine.deoxyribonucleotides.de.novo.biosynthesis.IV	rs12466926	A	G	0.255776	1.76507e-06	-0.0991623	0.0207513	7738	0.00294236	22.8293
GCST90027610	PWY.7198..pyrimidine.deoxyribonucleotides.de.novo.biosynthesis.IV	rs9310781	G	C	0.242162	9.58561e-06	-0.0962912	0.0217543	7738	0.00252556	19.5872
GCST90027610	PWY.7198..pyrimidine.deoxyribonucleotides.de.novo.biosynthesis.IV	rs6854439	T	C	0.481757	9.78968e-06	0.0789267	0.0178496	7738	0.00252039	19.547
GCST90027610	PWY.7198..pyrimidine.deoxyribonucleotides.de.novo.biosynthesis.IV	rs4739729	A	G	0.353332	1.50569e-06	-0.0924285	0.019214	7738	0.00298161	23.1347
GCST90027610	PWY.7198..pyrimidine.deoxyribonucleotides.de.novo.biosynthesis.IV	rs77945651	C	A	0.0551304	1.41829e-06	0.197268	0.0409065	7738	0.00299638	23.2497
GCST90027610	PWY.7198..pyrimidine.deoxyribonucleotides.de.novo.biosynthesis.IV	rs9508816	T	A	0.734997	5.5878e-06	-0.0962162	0.0211864	7738	0.00265826	20.6191
GCST90027610	PWY.7198..pyrimidine.deoxyribonucleotides.de.novo.biosynthesis.IV	rs8046267	G	C	0.142949	7.25824e-06	-0.116058	0.0258714	7738	0.00259392	20.1187
GCST90027611	PWY.7199..pyrimidine.deoxyribonucleosides.salvage	rs11713293	A	C	0.0581419	7.84678e-06	0.158361	0.0354328	7738	0.00257475	19.9697
GCST90027611	PWY.7199..pyrimidine.deoxyribonucleosides.salvage	rs55724545	C	G	0.244364	8.19526e-06	-0.0854652	0.0191625	7738	0.00256407	19.8866
GCST90027611	PWY.7199..pyrimidine.deoxyribonucleosides.salvage	rs72773357	C	T	0.157079	3.68864e-06	-0.103127	0.0222823	7738	0.00276054	21.4147
GCST90027611	PWY.7199..pyrimidine.deoxyribonucleosides.salvage	rs9522352	A	G	0.329568	6.36135e-06	-0.078448	0.0173788	7738	0.00262636	20.371
GCST90027611	PWY.7199..pyrimidine.deoxyribonucleosides.salvage	rs117273466	G	T	0.059133	3.6232e-06	-0.170639	0.0368399	7738	0.00276495	21.449
GCST90027611	PWY.7199..pyrimidine.deoxyribonucleosides.salvage	rs10416031	G	A	0.653782	2.43036e-06	-0.0794591	0.0168564	7738	0.00286341	22.215
GCST90027611	PWY.7199..pyrimidine.deoxyribonucleosides.salvage	rs1041447	T	C	0.581197	3.96751e-06	0.0755324	0.0163735	7738	0.00274258	21.275
GCST90027612	PWY.7209..superpathway.of.pyrimidine.ribonucleosides.degradation	rs6587723	C	T	0.439362	2.64853e-06	0.0993128	0.0211468	7738	0.00284221	22.05
GCST90027612	PWY.7209..superpathway.of.pyrimidine.ribonucleosides.degradation	rs12487786	C	T	0.757846	8.57115e-06	-0.102677	0.0230714	7738	0.00255305	19.8009
GCST90027612	PWY.7209..superpathway.of.pyrimidine.ribonucleosides.degradation	rs836868	T	A	0.60273	2.15693e-06	-0.0986201	0.0208141	7738	0.00289287	22.4441
GCST90027612	PWY.7209..superpathway.of.pyrimidine.ribonucleosides.degradation	rs6805759	G	A	0.527657	2.38843e-06	0.0946118	0.0200558	7738	0.00286771	22.2484
GCST90027612	PWY.7209..superpathway.of.pyrimidine.ribonucleosides.degradation	rs10489050	A	G	0.0855044	3.92604e-06	-0.164383	0.0356172	7738	0.00274517	21.2951
GCST90027612	PWY.7209..superpathway.of.pyrimidine.ribonucleosides.degradation	rs4260641	G	A	0.591584	8.36688e-06	-0.0893609	0.020056	7738	0.00255897	19.847
GCST90027612	PWY.7209..superpathway.of.pyrimidine.ribonucleosides.degradation	rs11242123	T	A	0.128552	4.88754e-08	-0.16115	0.0295398	7738	0.00383133	29.7532
GCST90027612	PWY.7209..superpathway.of.pyrimidine.ribonucleosides.degradation	rs4645398	C	T	0.211335	8.03187e-06	-0.109342	0.0244923	7738	0.00256902	19.9251
GCST90027612	PWY.7209..superpathway.of.pyrimidine.ribonucleosides.degradation	rs6454985	C	T	0.581833	6.35633e-06	-0.0889841	0.0197122	7738	0.00262655	20.3725
GCST90027612	PWY.7209..superpathway.of.pyrimidine.ribonucleosides.degradation	rs617079	G	C	0.0630626	3.30449e-06	-0.188862	0.0406074	7738	0.00278765	21.6255
GCST90027612	PWY.7209..superpathway.of.pyrimidine.ribonucleosides.degradation	rs1474383	C	T	0.637558	1.68188e-06	-0.0976871	0.0204012	7738	0.00295428	22.922
GCST90027612	PWY.7209..superpathway.of.pyrimidine.ribonucleosides.degradation	rs6473162	T	A	0.396473	5.93759e-06	0.0918696	0.0202865	7738	0.00264332	20.5029
GCST90027612	PWY.7209..superpathway.of.pyrimidine.ribonucleosides.degradation	rs261555	A	G	0.768291	1.76822e-06	-0.111062	0.0232431	7738	0.00294192	22.8258
GCST90027612	PWY.7209..superpathway.of.pyrimidine.ribonucleosides.degradation	rs16916531	A	C	0.322099	4.29148e-06	0.0996466	0.0216777	7738	0.00272325	21.1246
GCST90027612	PWY.7209..superpathway.of.pyrimidine.ribonucleosides.degradation	rs11215429	C	T	0.0526883	1.81183e-06	0.22683	0.04752	7738	0.0029359	22.779
GCST90027612	PWY.7209..superpathway.of.pyrimidine.ribonucleosides.degradation	rs4783337	C	G	0.931307	5.12967e-07	-0.220689	0.0439498	7738	0.00324794	25.2079
GCST90027613	PWY.7211..superpathway.of.pyrimidine.deoxyribonucleotides.de.novo.biosynthesis	rs12693170	A	C	0.754084	4.30817e-06	-0.0876407	0.0190692	7738	0.00272229	21.1171
GCST90027613	PWY.7211..superpathway.of.pyrimidine.deoxyribonucleotides.de.novo.biosynthesis	rs4624725	A	G	0.810342	2.76132e-06	0.101275	0.0216038	7738	0.00283192	21.97
GCST90027613	PWY.7211..superpathway.of.pyrimidine.deoxyribonucleotides.de.novo.biosynthesis	rs72835533	G	A	0.197483	7.66647e-06	-0.0941348	0.021039	7738	0.00258046	20.0141
GCST90027613	PWY.7211..superpathway.of.pyrimidine.deoxyribonucleotides.de.novo.biosynthesis	rs9463229	T	C	0.184748	6.13418e-06	0.0980088	0.0216752	7738	0.0026353	20.4406
GCST90027613	PWY.7211..superpathway.of.pyrimidine.deoxyribonucleotides.de.novo.biosynthesis	rs13203297	A	T	0.324735	5.80705e-06	0.0790555	0.0174388	7738	0.00264879	20.5455
GCST90027613	PWY.7211..superpathway.of.pyrimidine.deoxyribonucleotides.de.novo.biosynthesis	rs62485312	A	G	0.102164	1.89444e-06	0.134093	0.0281449	7738	0.00292489	22.6934
GCST90027613	PWY.7211..superpathway.of.pyrimidine.deoxyribonucleotides.de.novo.biosynthesis	rs327229	C	T	0.909395	8.3151e-06	-0.128276	0.0287814	7738	0.0025605	19.8589
GCST90027613	PWY.7211..superpathway.of.pyrimidine.deoxyribonucleotides.de.novo.biosynthesis	rs73335828	A	G	0.0554602	2.68492e-06	0.168873	0.0359797	7738	0.00283884	22.0238
GCST90027613	PWY.7211..superpathway.of.pyrimidine.deoxyribonucleotides.de.novo.biosynthesis	rs10886367	C	G	0.60289	5.67302e-07	0.083789	0.016751	7738	0.00322301	25.0138
GCST90027613	PWY.7211..superpathway.of.pyrimidine.deoxyribonucleotides.de.novo.biosynthesis	rs11223389	T	C	0.217382	4.08902e-06	0.0951344	0.0206508	7738	0.00273515	21.2172
GCST90027613	PWY.7211..superpathway.of.pyrimidine.deoxyribonucleotides.de.novo.biosynthesis	rs4074922	G	C	0.200294	4.97265e-06	-0.108702	0.0238071	7738	0.00268697	20.8424
GCST90027613	PWY.7211..superpathway.of.pyrimidine.deoxyribonucleotides.de.novo.biosynthesis	rs7492664	T	G	0.0726264	3.0899e-06	-0.147612	0.0316442	7738	0.0028042	21.7543
GCST90027613	PWY.7211..superpathway.of.pyrimidine.deoxyribonucleotides.de.novo.biosynthesis	rs6020972	T	C	0.495878	6.28117e-06	-0.0794081	0.017581	7738	0.00262948	20.3953
GCST90027613	PWY.7211..superpathway.of.pyrimidine.deoxyribonucleotides.de.novo.biosynthesis	rs4600724	C	A	0.498246	9.86102e-06	0.0723838	0.0163757	7738	0.0025186	19.5331
GCST90027614	PWY.7219..adenosine.ribonucleotides.de.novo.biosynthesis	rs7569681	C	T	0.086701	5.19005e-06	-0.131782	0.0289189	7738	0.00267644	20.7605
GCST90027614	PWY.7219..adenosine.ribonucleotides.de.novo.biosynthesis	rs35057482	T	C	0.0887948	3.05869e-06	-0.137282	0.0294165	7738	0.0028067	21.7738
GCST90027614	PWY.7219..adenosine.ribonucleotides.de.novo.biosynthesis	rs73142368	T	G	0.328782	8.51982e-06	-0.0775477	0.0174198	7738	0.00255452	19.8124
GCST90027614	PWY.7219..adenosine.ribonucleotides.de.novo.biosynthesis	rs62338928	G	A	0.324931	5.10657e-07	-0.087888	0.0174997	7738	0.00324906	25.2166
GCST90027614	PWY.7219..adenosine.ribonucleotides.de.novo.biosynthesis	rs1428949	T	C	0.433176	2.77516e-06	-0.0779739	0.0166369	7738	0.00283069	21.9604
GCST90027614	PWY.7219..adenosine.ribonucleotides.de.novo.biosynthesis	rs34848869	G	C	0.0629004	4.72983e-06	-0.162287	0.0354614	7738	0.0026993	20.9383
GCST90027614	PWY.7219..adenosine.ribonucleotides.de.novo.biosynthesis	rs7108080	A	G	0.508635	3.52268e-07	-0.085927	0.0168713	7738	0.00334104	25.9329
GCST90027614	PWY.7219..adenosine.ribonucleotides.de.novo.biosynthesis	rs79149938	G	A	0.0653077	5.99528e-06	-0.154991	0.0342404	7738	0.00264094	20.4844
GCST90027614	PWY.7219..adenosine.ribonucleotides.de.novo.biosynthesis	rs9582093	A	G	0.473701	9.37638e-06	-0.0717885	0.0162011	7738	0.00253098	19.6294
GCST90027614	PWY.7219..adenosine.ribonucleotides.de.novo.biosynthesis	rs71430764	A	C	0.050561	1.47126e-06	-0.203901	0.0423462	7738	0.00298733	23.1792
GCST90027614	PWY.7219..adenosine.ribonucleotides.de.novo.biosynthesis	rs4785220	C	T	0.680021	5.66824e-06	0.0782036	0.0172315	7738	0.00265474	20.5918
GCST90027614	PWY.7219..adenosine.ribonucleotides.de.novo.biosynthesis	rs7221118	C	T	0.229708	9.72752e-06	-0.0851742	0.0192565	7738	0.00252195	19.5591
GCST90027614	PWY.7219..adenosine.ribonucleotides.de.novo.biosynthesis	rs681147	A	T	0.178339	9.5965e-06	-0.0949868	0.0214607	7738	0.00252528	19.585
GCST90027615	PWY.7221..guanosine.ribonucleotides.de.novo.biosynthesis	rs143920868	T	C	0.0872329	1.16914e-06	-0.151033	0.0310716	7738	0.00304412	23.6212
GCST90027615	PWY.7221..guanosine.ribonucleotides.de.novo.biosynthesis	rs6427759	C	A	0.9086	2.42741e-06	-0.136692	0.0289961	7738	0.00286371	22.2173
GCST90027615	PWY.7221..guanosine.ribonucleotides.de.novo.biosynthesis	rs1428949	T	C	0.433176	3.4585e-06	-0.0770872	0.0166082	7738	0.00277642	21.5382
GCST90027615	PWY.7221..guanosine.ribonucleotides.de.novo.biosynthesis	rs11168050	A	G	0.0793935	3.02014e-06	0.141163	0.0302311	7738	0.00280983	21.7981
GCST90027615	PWY.7221..guanosine.ribonucleotides.de.novo.biosynthesis	rs6903592	A	T	0.318408	2.06896e-06	-0.0819131	0.0172573	7738	0.00290314	22.5241
GCST90027615	PWY.7221..guanosine.ribonucleotides.de.novo.biosynthesis	rs10817481	C	A	0.516451	2.48045e-06	-0.0773225	0.0164176	7738	0.00285838	22.1758
GCST90027615	PWY.7221..guanosine.ribonucleotides.de.novo.biosynthesis	rs7108080	A	G	0.508635	3.79039e-07	-0.0855444	0.0168421	7738	0.00332289	25.7915
GCST90027615	PWY.7221..guanosine.ribonucleotides.de.novo.biosynthesis	rs76346802	G	A	0.0931431	4.39846e-06	-0.128867	0.0280657	7738	0.00271718	21.0774
GCST90027615	PWY.7221..guanosine.ribonucleotides.de.novo.biosynthesis	rs1920088	G	A	0.875328	6.1295e-06	-0.111932	0.0247536	7738	0.00263549	20.442
GCST90027615	PWY.7221..guanosine.ribonucleotides.de.novo.biosynthesis	rs11058744	T	G	0.0707436	1.73868e-06	-0.153543	0.0321109	7738	0.00294608	22.8582
GCST90027615	PWY.7221..guanosine.ribonucleotides.de.novo.biosynthesis	rs41359044	T	C	0.0527914	8.64399e-06	-0.161094	0.0362125	7738	0.00255097	19.7847
GCST90027615	PWY.7221..guanosine.ribonucleotides.de.novo.biosynthesis	rs754639	A	G	0.33023	4.05786e-06	0.0855546	0.0185649	7738	0.00273704	21.2318
GCST90027615	PWY.7221..guanosine.ribonucleotides.de.novo.biosynthesis	rs12457526	T	G	0.382444	2.58214e-06	-0.0787255	0.0167447	7738	0.00284847	22.0987
GCST90027615	PWY.7221..guanosine.ribonucleotides.de.novo.biosynthesis	rs617024	T	C	0.134058	5.80527e-06	-0.110423	0.0243578	7738	0.00264886	20.546
GCST90027615	PWY.7221..guanosine.ribonucleotides.de.novo.biosynthesis	rs5766546	A	G	0.140928	5.24642e-06	-0.106	0.0232727	7738	0.00267378	20.7398
GCST90027616	PWY.7234..inosine.5..phosphate.biosynthesis.III	rs4374638	C	T	0.652742	7.52084e-06	0.0775467	0.0173157	7738	0.00258518	20.0508
GCST90027616	PWY.7234..inosine.5..phosphate.biosynthesis.III	rs35096174	A	C	0.0801648	3.09918e-06	-0.147662	0.031659	7738	0.00280346	21.7485
GCST90027616	PWY.7234..inosine.5..phosphate.biosynthesis.III	rs7796539	T	C	0.152561	5.1452e-06	0.104855	0.0230006	7738	0.00267857	20.7771
GCST90027616	PWY.7234..inosine.5..phosphate.biosynthesis.III	rs117005933	T	C	0.0599435	1.12753e-06	-0.169136	0.0347447	7738	0.00305308	23.691
GCST90027616	PWY.7234..inosine.5..phosphate.biosynthesis.III	rs9523744	C	A	0.414535	3.96056e-06	0.0815931	0.017686	7738	0.00274302	21.2783
GCST90027616	PWY.7234..inosine.5..phosphate.biosynthesis.III	rs11626206	T	C	0.679116	6.13254e-06	0.078505	0.0173616	7738	0.00263537	20.4411
GCST90027616	PWY.7234..inosine.5..phosphate.biosynthesis.III	rs112075774	A	G	0.0650248	3.5109e-06	-0.160161	0.0345293	7738	0.00277271	21.5093
GCST90027616	PWY.7234..inosine.5..phosphate.biosynthesis.III	rs928495	T	C	0.0973021	1.58347e-07	0.145157	0.0276882	7738	0.00353933	27.4775
GCST90027616	PWY.7234..inosine.5..phosphate.biosynthesis.III	rs79676117	C	A	0.0501897	1.15583e-08	-0.211348	0.0370389	7738	0.00419014	32.5513
GCST90027617	PWY.7237..myo...chiro..and.scillo.inositol.degradation	rs1515603	A	G	0.0680756	3.93273e-06	0.14961	0.0324188	7738	0.00274475	21.2919
GCST90027617	PWY.7237..myo...chiro..and.scillo.inositol.degradation	rs6448117	G	T	0.0525441	4.83711e-07	-0.188448	0.037445	7738	0.00326248	25.3212
GCST90027617	PWY.7237..myo...chiro..and.scillo.inositol.degradation	rs1455275	T	C	0.109073	3.9061e-06	0.121888	0.0264037	7738	0.00274643	21.3049
GCST90027617	PWY.7237..myo...chiro..and.scillo.inositol.degradation	rs4860463	G	A	0.88351	2.62271e-06	-0.128433	0.0273357	7738	0.00284462	22.0688
GCST90027617	PWY.7237..myo...chiro..and.scillo.inositol.degradation	rs4647693	C	T	0.261683	9.77957e-06	0.0858628	0.0194172	7738	0.00252064	19.5489
GCST90027617	PWY.7237..myo...chiro..and.scillo.inositol.degradation	rs3998109	A	G	0.349748	2.78514e-06	0.0808375	0.0172506	7738	0.0028298	21.9535
GCST90027617	PWY.7237..myo...chiro..and.scillo.inositol.degradation	rs12678419	G	C	0.15879	1.51011e-06	-0.108148	0.0224845	7738	0.00298089	23.1291
GCST90027617	PWY.7237..myo...chiro..and.scillo.inositol.degradation	rs7128538	A	G	0.469966	2.64408e-06	0.0772024	0.0164376	7738	0.00284262	22.0532
GCST90027617	PWY.7237..myo...chiro..and.scillo.inositol.degradation	rs80233470	T	C	0.114158	3.38306e-06	0.126112	0.0271438	7738	0.00278185	21.5805
GCST90027617	PWY.7237..myo...chiro..and.scillo.inositol.degradation	rs11226808	T	A	0.580596	8.56669e-06	-0.0745484	0.0167505	7738	0.00255317	19.8019
GCST90027617	PWY.7237..myo...chiro..and.scillo.inositol.degradation	rs144261381	T	A	0.0506988	9.44496e-06	0.168605	0.0380641	7738	0.00252919	19.6154
GCST90027617	PWY.7237..myo...chiro..and.scillo.inositol.degradation	rs9608542	C	T	0.062468	9.97231e-06	0.163644	0.0370421	7738	0.00251585	19.5117
GCST90027618	PWY.724..superpathway.of.L.lysine..L.threonine.and.L.methionine.biosynthesis.II	rs6733157	T	C	0.498335	1.42263e-06	-0.0793214	0.0164506	7738	0.00299563	23.2438
GCST90027618	PWY.724..superpathway.of.L.lysine..L.threonine.and.L.methionine.biosynthesis.II	rs337641	A	G	0.763879	1.48812e-06	0.0889729	0.0184866	7738	0.00298451	23.1573
GCST90027618	PWY.724..superpathway.of.L.lysine..L.threonine.and.L.methionine.biosynthesis.II	rs72703328	T	G	0.136402	7.36812e-06	0.107112	0.0238943	7738	0.00259022	20.09
GCST90027618	PWY.724..superpathway.of.L.lysine..L.threonine.and.L.methionine.biosynthesis.II	rs77200599	G	A	0.102372	9.86522e-06	0.116807	0.0264263	7738	0.0025185	19.5323
GCST90027618	PWY.724..superpathway.of.L.lysine..L.threonine.and.L.methionine.biosynthesis.II	rs12114032	G	A	0.550142	9.4417e-06	-0.0706482	0.0159492	7738	0.00252928	19.6161
GCST90027618	PWY.724..superpathway.of.L.lysine..L.threonine.and.L.methionine.biosynthesis.II	rs61889187	A	T	0.155585	3.66053e-07	0.110995	0.0218243	7738	0.00333152	25.8588
GCST90027618	PWY.724..superpathway.of.L.lysine..L.threonine.and.L.methionine.biosynthesis.II	rs73218301	C	T	0.191271	4.11438e-06	-0.0956164	0.0207613	7738	0.00273363	21.2053
GCST90027618	PWY.724..superpathway.of.L.lysine..L.threonine.and.L.methionine.biosynthesis.II	rs8179139	T	C	0.183388	5.53879e-06	-0.105293	0.0231756	7738	0.00266043	20.636
GCST90027618	PWY.724..superpathway.of.L.lysine..L.threonine.and.L.methionine.biosynthesis.II	rs111686525	T	A	0.0537814	2.86412e-06	-0.190749	0.0407554	7738	0.00282291	21.8998
GCST90027618	PWY.724..superpathway.of.L.lysine..L.threonine.and.L.methionine.biosynthesis.II	rs261316	T	C	0.605971	4.77532e-06	-0.0743683	0.0162574	7738	0.00269694	20.9199
GCST90027618	PWY.724..superpathway.of.L.lysine..L.threonine.and.L.methionine.biosynthesis.II	rs2908645	G	A	0.481448	8.43866e-06	-0.0724382	0.0162646	7738	0.00255687	19.8307
GCST90027618	PWY.724..superpathway.of.L.lysine..L.threonine.and.L.methionine.biosynthesis.II	rs17495513	T	G	0.169129	8.68518e-06	-0.0934359	0.0210084	7738	0.0025498	19.7757
GCST90027618	PWY.724..superpathway.of.L.lysine..L.threonine.and.L.methionine.biosynthesis.II	rs4797270	C	T	0.511347	9.39039e-06	0.0753597	0.0170083	7738	0.00253062	19.6265
GCST90027618	PWY.724..superpathway.of.L.lysine..L.threonine.and.L.methionine.biosynthesis.II	rs3815025	T	A	0.566425	4.91929e-06	-0.0750086	0.0164197	7738	0.00268963	20.8631
GCST90027619	PWY.7254..TCA.cycle.VII..acetate.producers.	rs2457055	A	G	0.307426	5.3981e-07	-0.12878	0.0256964	7738	0.00323531	25.1096
GCST90027619	PWY.7254..TCA.cycle.VII..acetate.producers.	rs2404677	C	T	0.785662	1.19409e-06	-0.139313	0.0286852	7738	0.0030389	23.5806
GCST90027619	PWY.7254..TCA.cycle.VII..acetate.producers.	rs7530547	T	A	0.212308	8.59202e-06	0.129693	0.0291453	7738	0.00255245	19.7963
GCST90027619	PWY.7254..TCA.cycle.VII..acetate.producers.	rs34467156	T	C	0.0715044	4.66486e-06	-0.216991	0.047385	7738	0.0027027	20.9648
GCST90027619	PWY.7254..TCA.cycle.VII..acetate.producers.	rs2619296	C	A	0.596267	5.09461e-06	-0.11477	0.0251641	7738	0.002681	20.796
GCST90027619	PWY.7254..TCA.cycle.VII..acetate.producers.	rs73871281	C	T	0.0901079	5.3412e-06	-0.189249	0.0415848	7738	0.00266937	20.7055
GCST90027619	PWY.7254..TCA.cycle.VII..acetate.producers.	rs7460645	G	A	0.523436	8.58443e-06	-0.104977	0.0235899	7738	0.00255267	19.798
GCST90027619	PWY.7254..TCA.cycle.VII..acetate.producers.	rs629769	G	A	0.817266	3.12805e-06	0.143273	0.0307305	7738	0.00280117	21.7308
GCST90027619	PWY.7254..TCA.cycle.VII..acetate.producers.	rs58352802	A	T	0.116632	6.83735e-06	-0.165393	0.0367647	7738	0.00260861	20.233
GCST90027619	PWY.7254..TCA.cycle.VII..acetate.producers.	rs73060070	A	C	0.12863	9.92561e-06	-0.159535	0.0361038	7738	0.002517	19.5206
GCST90027620	PWY.7315..dTDP.N.acetylthomosamine.biosynthesis	rs9973645	C	G	0.384928	8.42541e-06	-0.113614	0.0255079	7738	0.00255726	19.8337
GCST90027620	PWY.7315..dTDP.N.acetylthomosamine.biosynthesis	rs62385620	A	T	0.116897	1.25904e-06	0.200528	0.0413791	7738	0.00302581	23.4787
GCST90027620	PWY.7315..dTDP.N.acetylthomosamine.biosynthesis	rs2342632	C	T	0.417053	5.73247e-06	-0.114497	0.0252417	7738	0.00265197	20.5702
GCST90027620	PWY.7315..dTDP.N.acetylthomosamine.biosynthesis	rs7822956	G	A	0.811849	1.34371e-06	0.159007	0.0328991	7738	0.00300973	23.3536
GCST90027620	PWY.7315..dTDP.N.acetylthomosamine.biosynthesis	rs4880567	C	T	0.372512	7.81192e-06	-0.116117	0.0259754	7738	0.00257584	19.9782
GCST90027620	PWY.7315..dTDP.N.acetylthomosamine.biosynthesis	rs680199	C	T	0.349842	6.77262e-07	0.135523	0.0272805	7738	0.00317916	24.6724
GCST90027620	PWY.7315..dTDP.N.acetylthomosamine.biosynthesis	rs12921798	A	G	0.062169	7.08817e-06	0.241324	0.0537347	7738	0.00259975	20.1641
GCST90027620	PWY.7315..dTDP.N.acetylthomosamine.biosynthesis	rs11664919	A	G	0.659927	5.59553e-06	0.121368	0.0267264	7738	0.00265792	20.6165
GCST90027621	PWY.7323..superpathway.of.GDP.mannose.derived.O.antigen.building.blocks.biosynthesis	rs75227442	C	G	0.0527523	4.6286e-06	-0.177173	0.038676	7738	0.00270462	20.9797
GCST90027621	PWY.7323..superpathway.of.GDP.mannose.derived.O.antigen.building.blocks.biosynthesis	rs116649254	C	T	0.0583891	7.97874e-06	0.172504	0.0386282	7738	0.00257065	19.9378
GCST90027621	PWY.7323..superpathway.of.GDP.mannose.derived.O.antigen.building.blocks.biosynthesis	rs13032797	T	C	0.121105	5.55228e-06	-0.114245	0.0251489	7738	0.00265983	20.6313
GCST90027621	PWY.7323..superpathway.of.GDP.mannose.derived.O.antigen.building.blocks.biosynthesis	rs57799060	T	C	0.428927	2.55193e-06	0.0815404	0.0173345	7738	0.00285137	22.1213
GCST90027621	PWY.7323..superpathway.of.GDP.mannose.derived.O.antigen.building.blocks.biosynthesis	rs28556854	A	T	0.192389	7.52026e-07	-0.101993	0.0206154	7738	0.00315324	24.4707
GCST90027621	PWY.7323..superpathway.of.GDP.mannose.derived.O.antigen.building.blocks.biosynthesis	rs71507888	G	C	0.211343	4.22478e-06	-0.0973187	0.0211562	7738	0.00272711	21.1546
GCST90027621	PWY.7323..superpathway.of.GDP.mannose.derived.O.antigen.building.blocks.biosynthesis	rs12436806	A	T	0.120877	4.9481e-06	0.115932	0.0253848	7738	0.00268819	20.8519
GCST90027621	PWY.7323..superpathway.of.GDP.mannose.derived.O.antigen.building.blocks.biosynthesis	rs9949233	C	T	0.422092	3.59992e-06	-0.0782696	0.0168931	7738	0.00276654	21.4613
GCST90027621	PWY.7323..superpathway.of.GDP.mannose.derived.O.antigen.building.blocks.biosynthesis	rs6122425	A	C	0.224915	3.92256e-06	-0.0927808	0.0201023	7738	0.00274539	21.2968
GCST90027622	PWY.7328..superpathway.of.UDP.glucose.derived.O.antigen.building.blocks.biosynthesis	rs6531656	T	C	0.816578	1.44375e-06	-0.104541	0.021694	7738	0.00299199	23.2155
GCST90027622	PWY.7328..superpathway.of.UDP.glucose.derived.O.antigen.building.blocks.biosynthesis	rs903246	C	T	0.0800443	5.8721e-07	-0.154369	0.0309024	7738	0.00321447	24.9473
GCST90027622	PWY.7328..superpathway.of.UDP.glucose.derived.O.antigen.building.blocks.biosynthesis	rs432569	C	T	0.193202	6.21316e-07	-0.105977	0.0212614	7738	0.0032005	24.8385
GCST90027622	PWY.7328..superpathway.of.UDP.glucose.derived.O.antigen.building.blocks.biosynthesis	rs74242229	A	C	0.0742717	8.69201e-08	-0.172329	0.0321982	7738	0.00368826	28.638
GCST90027622	PWY.7328..superpathway.of.UDP.glucose.derived.O.antigen.building.blocks.biosynthesis	rs34532802	T	G	0.141256	3.31866e-06	0.113802	0.0244733	7738	0.00278659	21.6173
GCST90027622	PWY.7328..superpathway.of.UDP.glucose.derived.O.antigen.building.blocks.biosynthesis	rs1873471	C	G	0.537477	1.29287e-06	0.0866011	0.0178897	7738	0.00301926	23.4277
GCST90027622	PWY.7328..superpathway.of.UDP.glucose.derived.O.antigen.building.blocks.biosynthesis	rs4563069	A	G	0.10924	6.20859e-07	0.133636	0.0268096	7738	0.00320068	24.8399
GCST90027622	PWY.7328..superpathway.of.UDP.glucose.derived.O.antigen.building.blocks.biosynthesis	rs206592	C	T	0.291056	1.50911e-06	0.0927838	0.0192897	7738	0.00298105	23.1304
GCST90027622	PWY.7328..superpathway.of.UDP.glucose.derived.O.antigen.building.blocks.biosynthesis	rs45491295	A	G	0.140941	1.22106e-06	0.116848	0.0240815	7738	0.00303338	23.5377
GCST90027623	PWY.7371..1.4.dihydroxy.6.naphthoate.biosynthesis.II	rs7522136	A	C	0.12581	1.15326e-07	-0.142042	0.0267965	7738	0.00361803	28.0907
GCST90027623	PWY.7371..1.4.dihydroxy.6.naphthoate.biosynthesis.II	rs2102767	A	G	0.709047	4.85549e-06	0.088213	0.0192987	7738	0.00269284	20.8881
GCST90027623	PWY.7371..1.4.dihydroxy.6.naphthoate.biosynthesis.II	rs2704370	T	G	0.945046	7.97705e-06	0.169174	0.0378821	7738	0.0025707	19.9382
GCST90027623	PWY.7371..1.4.dihydroxy.6.naphthoate.biosynthesis.II	rs74928855	A	G	0.0590329	2.8758e-06	-0.171641	0.0366794	7738	0.0028219	21.892
GCST90027623	PWY.7371..1.4.dihydroxy.6.naphthoate.biosynthesis.II	rs1175227	T	G	0.203723	3.44902e-06	-0.100365	0.0216207	7738	0.0027771	21.5434
GCST90027623	PWY.7371..1.4.dihydroxy.6.naphthoate.biosynthesis.II	rs7772044	A	G	0.57181	4.53095e-06	-0.0790287	0.0172348	7738	0.00270987	21.0206
GCST90027623	PWY.7371..1.4.dihydroxy.6.naphthoate.biosynthesis.II	rs10794566	A	G	0.789814	9.80865e-06	-0.095978	0.0217079	7738	0.00251991	19.5433
GCST90027623	PWY.7371..1.4.dihydroxy.6.naphthoate.biosynthesis.II	rs221017	C	G	0.121301	3.88446e-06	-0.126929	0.027489	7738	0.0027478	21.3155
GCST90027623	PWY.7371..1.4.dihydroxy.6.naphthoate.biosynthesis.II	rs9623672	G	C	0.196096	1.69142e-06	-0.104503	0.0218298	7738	0.00295288	22.9112
GCST90027624	PWY.7392..taxadiene.biosynthesis..engineered.	rs12620133	A	C	0.203167	9.04508e-07	0.176894	0.0360173	7738	0.00310757	24.1151
GCST90027624	PWY.7392..taxadiene.biosynthesis..engineered.	rs17367434	T	A	0.165094	9.1455e-06	0.168407	0.0379598	7738	0.00253711	19.677
GCST90027624	PWY.7392..taxadiene.biosynthesis..engineered.	rs17437978	A	G	0.106237	2.6752e-06	0.218078	0.0464559	7738	0.00283974	22.0308
GCST90027624	PWY.7392..taxadiene.biosynthesis..engineered.	rs55779704	T	C	0.238625	9.57799e-06	-0.14775	0.0333786	7738	0.00252576	19.5887
GCST90027624	PWY.7392..taxadiene.biosynthesis..engineered.	rs78158506	T	C	0.0552142	7.05349e-06	-0.284961	0.0634364	7738	0.00260096	20.1735
GCST90027624	PWY.7392..taxadiene.biosynthesis..engineered.	rs12933705	T	C	0.0939864	5.01558e-06	-0.239934	0.0525695	7738	0.00268485	20.8259
GCST90027624	PWY.7392..taxadiene.biosynthesis..engineered.	rs4334283	G	A	0.462884	8.16695e-06	-0.128284	0.0287584	7738	0.00256492	19.8932
GCST90027624	PWY.7392..taxadiene.biosynthesis..engineered.	rs2423253	A	G	0.133066	4.2719e-06	0.194926	0.0423964	7738	0.00272437	21.1333
GCST90027624	PWY.7392..taxadiene.biosynthesis..engineered.	rs3827207	A	G	0.731967	1.88657e-06	-0.15646	0.0328339	7738	0.00292592	22.7014
GCST90027624	PWY.7392..taxadiene.biosynthesis..engineered.	rs5759126	G	A	0.535373	5.43165e-06	-0.131514	0.0289209	7738	0.00266524	20.6734
GCST90027625	PWY.7400..L.arginine.biosynthesis.IV..archaebacteria.	rs6603965	T	C	0.643205	4.38819e-06	-0.0786778	0.0171333	7738	0.00271776	21.0819
GCST90027625	PWY.7400..L.arginine.biosynthesis.IV..archaebacteria.	rs72974159	T	C	0.177263	5.08891e-06	0.0996458	0.0218469	7738	0.00268128	20.7982
GCST90027625	PWY.7400..L.arginine.biosynthesis.IV..archaebacteria.	rs67639354	T	G	0.25292	9.53943e-06	-0.0891229	0.02013	7738	0.00252675	19.5964
GCST90027625	PWY.7400..L.arginine.biosynthesis.IV..archaebacteria.	rs12658046	C	T	0.340781	2.46659e-06	-0.0812905	0.0172559	7738	0.00285976	22.1866
GCST90027625	PWY.7400..L.arginine.biosynthesis.IV..archaebacteria.	rs2910964	A	G	0.392802	4.87515e-06	0.0750064	0.0164125	7738	0.00269185	20.8803
GCST90027625	PWY.7400..L.arginine.biosynthesis.IV..archaebacteria.	rs11747315	A	G	0.274188	2.14504e-07	0.0940498	0.0181342	7738	0.00346402	26.8908
GCST90027625	PWY.7400..L.arginine.biosynthesis.IV..archaebacteria.	rs35569027	A	G	0.451022	6.43363e-08	0.0892195	0.0165028	7738	0.00376301	29.2206
GCST90027625	PWY.7400..L.arginine.biosynthesis.IV..archaebacteria.	rs12254238	G	A	0.161674	2.20561e-06	-0.104066	0.0219845	7738	0.00288736	22.4013
GCST90027625	PWY.7400..L.arginine.biosynthesis.IV..archaebacteria.	rs9300469	A	G	0.44351	6.47021e-06	-0.0763628	0.0169303	7738	0.00262218	20.3385
GCST90027625	PWY.7400..L.arginine.biosynthesis.IV..archaebacteria.	rs12932449	G	A	0.0515282	6.11579e-06	0.176738	0.039081	7738	0.00263604	20.4463
GCST90027626	PWY.7446..sulfoglycolysis	rs11691985	T	A	0.0994064	3.60997e-07	-0.294206	0.0578183	7738	0.00333497	25.8857
GCST90027626	PWY.7446..sulfoglycolysis	rs1919443	G	A	0.0861027	3.70182e-06	-0.281398	0.0608104	7738	0.00275966	21.4078
GCST90027626	PWY.7446..sulfoglycolysis	rs35490354	T	C	0.206551	3.11701e-07	-0.217557	0.042523	7738	0.00337136	26.1691
GCST90027626	PWY.7446..sulfoglycolysis	rs7783534	C	G	0.710052	2.37404e-07	-0.197772	0.0382732	7738	0.00343887	26.6949
GCST90027626	PWY.7446..sulfoglycolysis	rs4236575	C	T	0.779456	9.64656e-06	0.184543	0.0417051	7738	0.002524	19.5751
GCST90027626	PWY.7446..sulfoglycolysis	rs61445572	C	A	0.0788306	4.19872e-06	-0.304012	0.0660709	7738	0.00272863	21.1664
GCST90027626	PWY.7446..sulfoglycolysis	rs4937552	C	G	0.390939	6.41961e-07	-0.172564	0.0346642	7738	0.0031924	24.7755
GCST90027626	PWY.7446..sulfoglycolysis	rs12370008	T	C	0.267372	1.30489e-06	-0.186497	0.0385403	7738	0.00301697	23.4099
GCST90027626	PWY.7446..sulfoglycolysis	rs12810337	G	A	0.0786292	8.19529e-06	-0.3032	0.0679819	7738	0.00256407	19.8866
GCST90027626	PWY.7446..sulfoglycolysis	rs73154176	G	A	0.124924	6.80306e-06	0.272074	0.060464	7738	0.00260985	20.2426
GCST90027627	PWY.7456..mannan.degradation	rs75364946	A	T	0.0549186	7.23346e-06	-0.170618	0.0380275	7738	0.00259476	20.1253
GCST90027627	PWY.7456..mannan.degradation	rs10484380	A	G	0.10357	1.2434e-06	-0.134172	0.0276723	7738	0.0030289	23.5028
GCST90027627	PWY.7456..mannan.degradation	rs2529194	T	C	0.130508	4.01894e-06	0.119914	0.0260095	7738	0.00273941	21.2503
GCST90027627	PWY.7456..mannan.degradation	rs62568199	G	T	0.0768724	1.00476e-06	0.160038	0.0327229	7738	0.00308158	23.9128
GCST90027627	PWY.7456..mannan.degradation	rs113296815	A	G	0.0707202	3.60113e-07	0.207512	0.0407773	7738	0.00333558	25.8904
GCST90027627	PWY.7456..mannan.degradation	rs7987291	G	A	0.188888	7.2467e-06	0.123872	0.0276111	7738	0.00259431	20.1218
GCST90027627	PWY.7456..mannan.degradation	rs7196834	T	C	0.350235	8.57579e-06	-0.0993086	0.0223151	7738	0.00255291	19.7999
GCST90027628	PWY.841..superpathway.of.purine.nucleotides.de.novo.biosynthesis.I	rs12753986	T	C	0.0739675	8.85187e-06	-0.144732	0.0325718	7738	0.00254513	19.7393
GCST90027628	PWY.841..superpathway.of.purine.nucleotides.de.novo.biosynthesis.I	rs11588127	A	G	0.154512	1.79236e-06	-0.109939	0.0230214	7738	0.00293857	22.7998
GCST90027628	PWY.841..superpathway.of.purine.nucleotides.de.novo.biosynthesis.I	rs4954528	A	T	0.914912	9.93646e-06	-0.127826	0.0289295	7738	0.00251673	19.5186
GCST90027628	PWY.841..superpathway.of.purine.nucleotides.de.novo.biosynthesis.I	rs60748324	T	C	0.0730989	1.7623e-06	0.149181	0.0312164	7738	0.00294275	22.8323
GCST90027628	PWY.841..superpathway.of.purine.nucleotides.de.novo.biosynthesis.I	rs1584586	A	G	0.346666	3.47413e-08	0.0920891	0.0166959	7738	0.00391622	30.415
GCST90027628	PWY.841..superpathway.of.purine.nucleotides.de.novo.biosynthesis.I	rs35842518	A	G	0.0596521	5.65014e-06	0.153256	0.0337637	7738	0.00265553	20.5979
GCST90027628	PWY.841..superpathway.of.purine.nucleotides.de.novo.biosynthesis.I	rs13162740	A	G	0.126842	5.33977e-06	0.109993	0.0241692	7738	0.00266944	20.706
GCST90027628	PWY.841..superpathway.of.purine.nucleotides.de.novo.biosynthesis.I	rs17644950	G	C	0.137048	7.34381e-06	-0.115465	0.0257536	7738	0.00259104	20.0963
GCST90027628	PWY.841..superpathway.of.purine.nucleotides.de.novo.biosynthesis.I	rs35698389	G	A	0.12754	3.65006e-06	0.112728	0.0243454	7738	0.00276313	21.4348
GCST90027628	PWY.841..superpathway.of.purine.nucleotides.de.novo.biosynthesis.I	rs57187632	A	C	0.0603515	2.78799e-06	-0.158755	0.0338797	7738	0.00282955	21.9515
GCST90027628	PWY.841..superpathway.of.purine.nucleotides.de.novo.biosynthesis.I	rs878453	C	T	0.373889	9.04537e-06	0.0752095	0.0169436	7738	0.00253981	19.698
GCST90027629	PWY_ARG.POLYAMINE.SYN..superpathway.of.arginine.and.polyamine.biosynthesis	rs112683661	A	G	0.125286	1.12525e-06	-0.129237	0.0265462	7738	0.00305358	23.6949
GCST90027629	PWY_ARG.POLYAMINE.SYN..superpathway.of.arginine.and.polyamine.biosynthesis	rs4841463	G	T	0.0958184	5.35625e-08	-0.164027	0.0301572	7738	0.00380857	29.5757
GCST90027629	PWY_ARG.POLYAMINE.SYN..superpathway.of.arginine.and.polyamine.biosynthesis	rs1907895	A	G	0.37156	3.92956e-07	-0.0914668	0.0180325	7738	0.00331395	25.722
GCST90027629	PWY_ARG.POLYAMINE.SYN..superpathway.of.arginine.and.polyamine.biosynthesis	rs11596863	A	G	0.0800031	3.65752e-06	-0.150086	0.0324162	7738	0.00276263	21.4309
GCST90027629	PWY_ARG.POLYAMINE.SYN..superpathway.of.arginine.and.polyamine.biosynthesis	rs7117995	A	C	0.555523	2.22798e-06	-0.0834466	0.0176362	7738	0.00288487	22.3819
GCST90027629	PWY_ARG.POLYAMINE.SYN..superpathway.of.arginine.and.polyamine.biosynthesis	rs10845128	T	C	0.825109	5.38222e-06	-0.111202	0.0244437	7738	0.00266749	20.6909
GCST90027629	PWY_ARG.POLYAMINE.SYN..superpathway.of.arginine.and.polyamine.biosynthesis	rs73162129	A	C	0.0841576	4.7443e-06	-0.149823	0.0327426	7738	0.00269854	20.9324
GCST90027629	PWY_ARG.POLYAMINE.SYN..superpathway.of.arginine.and.polyamine.biosynthesis	rs4943736	G	C	0.550375	6.84749e-06	0.0810859	0.0180256	7738	0.00260824	20.2301
GCST90027630	PWY_GLYCOLYSIS.E.D..superpathway.of.glycolysis.and.Entner.Doudoroff	rs73001914	G	A	0.182659	4.47804e-06	-0.099592	0.0217077	7738	0.00271277	21.0431
GCST90027630	PWY_GLYCOLYSIS.E.D..superpathway.of.glycolysis.and.Entner.Doudoroff	rs7861671	C	G	0.824424	8.65192e-06	-0.0956664	0.0215059	7738	0.00255074	19.783
GCST90027630	PWY_GLYCOLYSIS.E.D..superpathway.of.glycolysis.and.Entner.Doudoroff	rs56355152	G	A	0.282307	3.50668e-06	0.0855056	0.0184332	7738	0.00277301	21.5116
GCST90027630	PWY_GLYCOLYSIS.E.D..superpathway.of.glycolysis.and.Entner.Doudoroff	rs7305791	T	A	0.267398	3.32832e-06	-0.086344	0.0185708	7738	0.00278588	21.6117
GCST90027630	PWY_GLYCOLYSIS.E.D..superpathway.of.glycolysis.and.Entner.Doudoroff	rs61641915	G	A	0.265486	4.17667e-06	0.0857279	0.0186268	7738	0.00272993	21.1765
GCST90027630	PWY_GLYCOLYSIS.E.D..superpathway.of.glycolysis.and.Entner.Doudoroff	rs17122325	T	G	0.283931	7.87156e-07	0.0906787	0.0183615	7738	0.00314195	24.3827
GCST90027630	PWY_GLYCOLYSIS.E.D..superpathway.of.glycolysis.and.Entner.Doudoroff	rs7228238	T	C	0.415585	6.31244e-08	-0.0898501	0.016609	7738	0.00376774	29.2575
GCST90027630	PWY_GLYCOLYSIS.E.D..superpathway.of.glycolysis.and.Entner.Doudoroff	rs2423617	G	A	0.416906	3.98299e-06	-0.0767759	0.016646	7738	0.00274162	21.2675
GCST90027631	PWY_GLYCOLYSIS..glycolysis.I..from.glucose.6.phosphate.	rs548331	A	T	0.776195	4.91691e-06	0.0893695	0.019563	7738	0.00268975	20.864
GCST90027631	PWY_GLYCOLYSIS..glycolysis.I..from.glucose.6.phosphate.	rs9659982	G	A	0.0955102	7.25232e-06	-0.126431	0.0281826	7738	0.00259412	20.1203
GCST90027631	PWY_GLYCOLYSIS..glycolysis.I..from.glucose.6.phosphate.	rs60761380	G	A	0.11681	4.54403e-06	-0.115163	0.0251184	7738	0.00270917	21.015
GCST90027631	PWY_GLYCOLYSIS..glycolysis.I..from.glucose.6.phosphate.	rs76027112	G	A	0.119239	1.84166e-06	-0.12899	0.0270416	7738	0.00293187	22.7476
GCST90027631	PWY_GLYCOLYSIS..glycolysis.I..from.glucose.6.phosphate.	rs79214669	T	G	0.0515445	7.2614e-06	-0.165555	0.0369057	7738	0.00259381	20.1179
GCST90027631	PWY_GLYCOLYSIS..glycolysis.I..from.glucose.6.phosphate.	rs72639725	C	T	0.117943	5.36627e-07	-0.127613	0.0254577	7738	0.00323677	25.121
GCST90027631	PWY_GLYCOLYSIS..glycolysis.I..from.glucose.6.phosphate.	rs10499452	G	A	0.0598447	6.50082e-06	-0.154288	0.0342147	7738	0.00262102	20.3295
GCST90027631	PWY_GLYCOLYSIS..glycolysis.I..from.glucose.6.phosphate.	rs62560771	A	T	0.273987	6.01856e-06	0.086881	0.0191971	7738	0.00263999	20.477
GCST90027631	PWY_GLYCOLYSIS..glycolysis.I..from.glucose.6.phosphate.	rs10761652	A	G	0.74949	6.80814e-06	0.0842213	0.0187175	7738	0.00260966	20.2412
GCST90027631	PWY_GLYCOLYSIS..glycolysis.I..from.glucose.6.phosphate.	rs9512593	G	A	0.299083	6.45542e-06	0.0822548	0.0182347	7738	0.00262275	20.3429
GCST90027631	PWY_GLYCOLYSIS..glycolysis.I..from.glucose.6.phosphate.	rs2025478	G	T	0.153308	9.52582e-06	-0.0996834	0.0225138	7738	0.0025271	19.5992
GCST90027631	PWY_GLYCOLYSIS..glycolysis.I..from.glucose.6.phosphate.	rs7323649	T	G	0.167757	8.29708e-06	0.0960386	0.021546	7738	0.00256103	19.863
GCST90027631	PWY_GLYCOLYSIS..glycolysis.I..from.glucose.6.phosphate.	rs1394890	T	C	0.946721	3.4252e-06	-0.182706	0.0393463	7738	0.0027788	21.5567
GCST90027631	PWY_GLYCOLYSIS..glycolysis.I..from.glucose.6.phosphate.	rs1398954	A	G	0.839316	3.00353e-06	0.105322	0.0225501	7738	0.00281119	21.8087
GCST90027631	PWY_GLYCOLYSIS..glycolysis.I..from.glucose.6.phosphate.	rs12626113	T	C	0.246035	3.77377e-06	0.0910727	0.0196979	7738	0.00275492	21.3709
GCST90027632	PWY_GLYOXYLATE.BYPASS..glyoxylate.cycle	rs938914	C	T	0.441336	9.52224e-06	-0.0944631	0.0213343	7738	0.00252719	19.5999
GCST90027632	PWY_GLYOXYLATE.BYPASS..glyoxylate.cycle	rs62385620	A	T	0.113762	3.6387e-06	0.161437	0.03486	7738	0.0027639	21.4408
GCST90027632	PWY_GLYOXYLATE.BYPASS..glyoxylate.cycle	rs245907	A	G	0.475389	2.85327e-06	-0.0983522	0.0210104	7738	0.00282384	21.9071
GCST90027632	PWY_GLYOXYLATE.BYPASS..glyoxylate.cycle	rs3801158	C	G	0.802068	3.5368e-06	-0.125045	0.0269673	7738	0.0027709	21.4952
GCST90027632	PWY_GLYOXYLATE.BYPASS..glyoxylate.cycle	rs10866960	C	T	0.716727	7.18463e-06	-0.1047	0.0233281	7738	0.00259643	20.1382
GCST90027632	PWY_GLYOXYLATE.BYPASS..glyoxylate.cycle	rs7913326	C	T	0.197293	2.52199e-06	0.123808	0.0263067	7738	0.00285428	22.144
GCST90027632	PWY_GLYOXYLATE.BYPASS..glyoxylate.cycle	rs78848972	G	A	0.149857	2.14983e-06	0.140326	0.029612	7738	0.00289368	22.4505
GCST90027632	PWY_GLYOXYLATE.BYPASS..glyoxylate.cycle	rs78069526	A	G	0.126714	5.92953e-06	-0.144569	0.0319216	7738	0.00264365	20.5055
GCST90027632	PWY_GLYOXYLATE.BYPASS..glyoxylate.cycle	rs11627712	A	G	0.253168	6.27883e-06	0.108539	0.0240302	7738	0.00262957	20.396
GCST90027632	PWY_GLYOXYLATE.BYPASS..glyoxylate.cycle	rs12921798	A	G	0.0598904	3.90706e-06	0.211209	0.0457533	7738	0.00274637	21.3044
GCST90027633	PWY_HEME.BIOSYNTHESIS.II..heme.biosynthesis.I..aerobic.	rs11678288	A	T	0.606247	7.72181e-06	-0.085742	0.0191698	7738	0.0025787	20.0004
GCST90027633	PWY_HEME.BIOSYNTHESIS.II..heme.biosynthesis.I..aerobic.	rs2128405	C	A	0.0500915	4.57292e-06	0.198151	0.0432315	7738	0.0027076	21.0029
GCST90027633	PWY_HEME.BIOSYNTHESIS.II..heme.biosynthesis.I..aerobic.	rs1395789	G	C	0.723195	9.34133e-08	0.115492	0.0216315	7738	0.00367036	28.4985
GCST90027633	PWY_HEME.BIOSYNTHESIS.II..heme.biosynthesis.I..aerobic.	rs1496548	T	C	0.549	1.82903e-06	-0.0894676	0.0187506	7738	0.00293357	22.7609
GCST90027633	PWY_HEME.BIOSYNTHESIS.II..heme.biosynthesis.I..aerobic.	rs2054065	C	T	0.554871	8.12413e-06	0.084338	0.0189019	7738	0.00256621	19.9033
GCST90027633	PWY_HEME.BIOSYNTHESIS.II..heme.biosynthesis.I..aerobic.	rs11788169	G	T	0.0575425	3.34556e-06	0.187961	0.0404357	7738	0.0027846	21.6018
GCST90027633	PWY_HEME.BIOSYNTHESIS.II..heme.biosynthesis.I..aerobic.	rs10836973	A	C	0.127794	6.19885e-06	-0.127111	0.0281251	7738	0.00263272	20.4205
GCST90027633	PWY_HEME.BIOSYNTHESIS.II..heme.biosynthesis.I..aerobic.	rs2373545	C	G	0.104418	6.99131e-06	-0.145595	0.0323979	7738	0.00260313	20.1904
GCST90027633	PWY_HEME.BIOSYNTHESIS.II..heme.biosynthesis.I..aerobic.	rs55950535	T	C	0.0739645	7.05068e-06	-0.161429	0.0359358	7738	0.00260105	20.1742
GCST90027633	PWY_HEME.BIOSYNTHESIS.II..heme.biosynthesis.I..aerobic.	rs111974902	T	C	0.101329	3.55827e-06	0.145393	0.0313641	7738	0.00276941	21.4836
GCST90027633	PWY_HEME.BIOSYNTHESIS.II..heme.biosynthesis.I..aerobic.	rs16966731	C	T	0.328583	8.17025e-06	0.08983	0.0201382	7738	0.00256482	19.8925
GCST90027633	PWY_HEME.BIOSYNTHESIS.II..heme.biosynthesis.I..aerobic.	rs6043422	A	G	0.513648	7.84039e-06	0.0848707	0.0189889	7738	0.00257495	19.9712
GCST90027633	PWY_HEME.BIOSYNTHESIS.II..heme.biosynthesis.I..aerobic.	rs2427354	C	T	0.707789	2.9275e-06	0.098874	0.0211457	7738	0.00281751	21.8578
GCST90027634	PWY_NAD.BIOSYNTHESIS.II..NAD.salvage.pathway.II	rs9817097	G	C	0.111594	5.3912e-06	0.172688	0.037962	7738	0.00266708	20.6877
GCST90027634	PWY_NAD.BIOSYNTHESIS.II..NAD.salvage.pathway.II	rs2342646	A	G	0.680086	7.61851e-06	0.111203	0.0248464	7738	0.00258201	20.0261
GCST90027634	PWY_NAD.BIOSYNTHESIS.II..NAD.salvage.pathway.II	rs12533114	G	A	0.371541	6.11534e-06	0.111225	0.0245945	7738	0.00263606	20.4465
GCST90027634	PWY_NAD.BIOSYNTHESIS.II..NAD.salvage.pathway.II	rs245907	A	G	0.471259	3.44147e-06	-0.10733	0.0231189	7738	0.00277764	21.5476
GCST90027634	PWY_NAD.BIOSYNTHESIS.II..NAD.salvage.pathway.II	rs2819206	T	C	0.604069	4.49511e-06	0.110186	0.024021	7738	0.00271183	21.0358
GCST90027634	PWY_NAD.BIOSYNTHESIS.II..NAD.salvage.pathway.II	rs55811317	T	C	0.297823	6.24962e-06	0.116996	0.0258969	7738	0.00263072	20.4049
GCST90027634	PWY_NAD.BIOSYNTHESIS.II..NAD.salvage.pathway.II	rs1793041	T	C	0.38314	8.33831e-06	0.105175	0.0236014	7738	0.00255982	19.8536
GCST90027634	PWY_NAD.BIOSYNTHESIS.II..NAD.salvage.pathway.II	rs11219874	C	T	0.101727	5.61009e-06	-0.17099	0.0376582	7738	0.00265728	20.6115
GCST90027634	PWY_NAD.BIOSYNTHESIS.II..NAD.salvage.pathway.II	rs9603946	T	C	0.148854	5.39241e-06	0.1547	0.0340081	7738	0.00266702	20.6872
GCST90027634	PWY_NAD.BIOSYNTHESIS.II..NAD.salvage.pathway.II	rs11629188	G	C	0.18	9.55144e-07	-0.154934	0.0316149	7738	0.0030941	24.0103
GCST90027634	PWY_NAD.BIOSYNTHESIS.II..NAD.salvage.pathway.II	rs7194361	T	C	0.202604	5.45602e-07	-0.164574	0.0328522	7738	0.00323267	25.089
GCST90027634	PWY_NAD.BIOSYNTHESIS.II..NAD.salvage.pathway.II	rs16967152	C	T	0.224629	1.8953e-06	0.130239	0.0273366	7738	0.00292478	22.6925
GCST90027634	PWY_NAD.BIOSYNTHESIS.II..NAD.salvage.pathway.II	rs11664244	A	G	0.870587	5.07389e-06	0.160054	0.0350864	7738	0.00268201	20.8038
GCST90027634	PWY_NAD.BIOSYNTHESIS.II..NAD.salvage.pathway.II	rs34588554	A	G	0.101972	3.85717e-06	-0.172734	0.0373969	7738	0.00274953	21.329
GCST90027635	PWY_REDCITCYC..TCA.cycle.VIII..helicobacter.	rs10159356	G	A	0.307959	7.52353e-09	-0.140708	0.024349	7738	0.00429711	33.3859
GCST90027635	PWY_REDCITCYC..TCA.cycle.VIII..helicobacter.	rs61545203	C	A	0.106004	3.39947e-06	-0.167342	0.0360257	7738	0.00278066	21.5712
GCST90027635	PWY_REDCITCYC..TCA.cycle.VIII..helicobacter.	rs12035973	A	G	0.171607	3.73092e-06	0.137461	0.029716	7738	0.00275773	21.3928
GCST90027635	PWY_REDCITCYC..TCA.cycle.VIII..helicobacter.	rs2420153	T	A	0.923444	2.86416e-06	0.205908	0.0439944	7738	0.0028229	21.8998
GCST90027635	PWY_REDCITCYC..TCA.cycle.VIII..helicobacter.	rs62303695	C	A	0.118713	8.40352e-06	-0.153066	0.0343611	7738	0.0025579	19.8387
GCST90027635	PWY_REDCITCYC..TCA.cycle.VIII..helicobacter.	rs3923652	C	A	0.104567	1.67174e-06	-0.173724	0.0362716	7738	0.00295577	22.9336
GCST90027635	PWY_REDCITCYC..TCA.cycle.VIII..helicobacter.	rs10813349	T	C	0.413631	8.90878e-06	-0.105645	0.0237828	7738	0.00254355	19.7271
GCST90027635	PWY_REDCITCYC..TCA.cycle.VIII..helicobacter.	rs7111149	G	A	0.567282	8.77147e-06	-0.0989675	0.0222627	7738	0.00254737	19.7568
GCST90027635	PWY_REDCITCYC..TCA.cycle.VIII..helicobacter.	rs12371717	T	C	0.337762	8.806e-06	0.106466	0.0239541	7738	0.0025464	19.7493
GCST90027635	PWY_REDCITCYC..TCA.cycle.VIII..helicobacter.	rs8057488	T	C	0.0512434	1.08204e-06	0.244418	0.0501257	7738	0.00306326	23.7702
GCST90027635	PWY_REDCITCYC..TCA.cycle.VIII..helicobacter.	rs9965721	C	A	0.582177	3.91821e-06	-0.116121	0.025158	7738	0.00274566	21.2989
GCST90027636	PWY_TCA.GLYOX.BYPASS..superpathway.of.glyoxylate.bypass.and.TCA	rs73952138	A	C	0.0902387	9.07029e-06	0.18117	0.0408204	7738	0.00253914	19.6928
GCST90027636	PWY_TCA.GLYOX.BYPASS..superpathway.of.glyoxylate.bypass.and.TCA	rs10189685	A	G	0.316834	9.41037e-06	-0.110199	0.024874	7738	0.00253009	19.6225
GCST90027636	PWY_TCA.GLYOX.BYPASS..superpathway.of.glyoxylate.bypass.and.TCA	rs6809947	G	A	0.409104	9.80213e-06	0.112391	0.0254192	7738	0.00252007	19.5445
GCST90027636	PWY_TCA.GLYOX.BYPASS..superpathway.of.glyoxylate.bypass.and.TCA	rs7775419	T	C	0.0668613	9.50596e-06	-0.204563	0.0461964	7738	0.00252761	19.6031
GCST90027636	PWY_TCA.GLYOX.BYPASS..superpathway.of.glyoxylate.bypass.and.TCA	rs117650960	C	T	0.0585564	6.79219e-06	-0.240704	0.0534886	7738	0.00261024	20.2457
GCST90027636	PWY_TCA.GLYOX.BYPASS..superpathway.of.glyoxylate.bypass.and.TCA	rs7798574	C	T	0.886375	4.74054e-07	0.181742	0.0360849	7738	0.00326748	25.3601
GCST90027636	PWY_TCA.GLYOX.BYPASS..superpathway.of.glyoxylate.bypass.and.TCA	rs72814612	C	A	0.105935	3.06092e-06	0.185814	0.0398171	7738	0.00280652	21.7724
GCST90027636	PWY_TCA.GLYOX.BYPASS..superpathway.of.glyoxylate.bypass.and.TCA	rs6502722	A	G	0.149997	9.35274e-06	-0.146169	0.0329833	7738	0.0025316	19.6342
GCST90027636	PWY_TCA.GLYOX.BYPASS..superpathway.of.glyoxylate.bypass.and.TCA	rs2739436	G	A	0.164125	5.03237e-06	-0.171328	0.0375436	7738	0.00268403	20.8195
GCST90027637	PYRIDNUCSAL.PWY..NAD.salvage.pathway.I	rs62149083	C	T	0.178452	9.14458e-07	-0.121535	0.0247565	7738	0.00310487	24.0941
GCST90027637	PYRIDNUCSAL.PWY..NAD.salvage.pathway.I	rs12635648	T	C	0.0669666	6.83247e-06	-0.168004	0.0373439	7738	0.00260878	20.2343
GCST90027637	PYRIDNUCSAL.PWY..NAD.salvage.pathway.I	rs6931936	G	A	0.222468	4.27057e-06	0.118448	0.025762	7738	0.00272445	21.1339
GCST90027637	PYRIDNUCSAL.PWY..NAD.salvage.pathway.I	rs7864936	A	G	0.64806	1.32174e-06	-0.105984	0.0219135	7738	0.0030138	23.3853
GCST90027637	PYRIDNUCSAL.PWY..NAD.salvage.pathway.I	rs577575	A	G	0.0956027	8.95688e-07	0.161957	0.0329632	7738	0.00311	24.134
GCST90027637	PYRIDNUCSAL.PWY..NAD.salvage.pathway.I	rs7971953	C	G	0.219371	1.10463e-06	-0.11292	0.0231773	7738	0.00305815	23.7304
GCST90027637	PYRIDNUCSAL.PWY..NAD.salvage.pathway.I	rs35387980	T	C	0.108644	9.72336e-06	-0.139656	0.0315732	7738	0.00252206	19.56
GCST90027637	PYRIDNUCSAL.PWY..NAD.salvage.pathway.I	rs72710486	T	C	0.0593394	7.83998e-06	-0.196931	0.044061	7738	0.00257496	19.9713
GCST90027637	PYRIDNUCSAL.PWY..NAD.salvage.pathway.I	rs8057488	T	C	0.0525851	7.12439e-06	0.18947	0.0421987	7738	0.0025985	20.1543
GCST90027637	PYRIDNUCSAL.PWY..NAD.salvage.pathway.I	rs6503214	G	A	0.848351	7.74454e-06	-0.119644	0.0267533	7738	0.00257797	19.9948
GCST90027637	PYRIDNUCSAL.PWY..NAD.salvage.pathway.I	rs34438166	G	C	0.0996485	4.4476e-06	0.156423	0.0340843	7738	0.00271445	21.0561
GCST90027637	PYRIDNUCSAL.PWY..NAD.salvage.pathway.I	rs62085413	T	C	0.0984565	9.23533e-06	-0.141638	0.0319411	7738	0.00253471	19.6583
GCST90027637	PYRIDNUCSAL.PWY..NAD.salvage.pathway.I	rs715902	A	G	0.144889	7.39629e-06	0.122482	0.0273278	7738	0.00258929	20.0827
GCST90027637	PYRIDNUCSAL.PWY..NAD.salvage.pathway.I	rs79016563	A	G	0.050432	6.13194e-06	0.204652	0.045259	7738	0.00263539	20.4413
GCST90027638	PYRIDNUCSYN.PWY..NAD.biosynthesis.I..from.aspartate.	rs1126742	G	A	0.138917	4.41874e-06	-0.108664	0.0236707	7738	0.00271605	21.0686
GCST90027638	PYRIDNUCSYN.PWY..NAD.biosynthesis.I..from.aspartate.	rs143920868	T	C	0.0872441	4.28182e-07	-0.156463	0.0309462	7738	0.00329268	25.5563
GCST90027638	PYRIDNUCSYN.PWY..NAD.biosynthesis.I..from.aspartate.	rs10469756	C	T	0.926907	6.53621e-06	-0.141194	0.0313189	7738	0.00261969	20.3191
[truncated: 2,043 more rows]

## Sheet: Table S2
Instrumental variables used in MR analysis of 3 sleep-related traits
Exposure_Trait	SNP	Effect_Allele	Other_Allele	MAF	Pval	BETA	SE	N	R2	F
sleep duration	rs4642942	C	G	0.4148	3.065e-08	0.0138	0.002492	380042	8.06855e-05	30.6662
sleep duration	rs915416	C	G	0.2906	8.15e-12	0.01842	0.002694	382439	0.000122227	46.75
sleep duration	rs540431	G	A	0.4502	4.908e-09	-0.01442	0.002465	380516	8.99259e-05	34.2211
sleep duration	rs884712	G	T	0.4899	3.296e-08	0.0138	0.002498	368397	8.28364e-05	30.519
sleep duration	rs79512144	A	G	0.06477	3.643e-08	-0.02738	0.004972	382168	7.93443e-05	30.3251
sleep duration	rs2683634	T	C	0.4002	6.299e-13	-0.01794	0.002494	383195	0.000135012	51.7428
sleep duration	rs116219610	T	C	0.1927	4.754e-14	0.02345	0.00311	380636	0.000149345	56.8542
sleep duration	rs62158206	C	T	0.2189	3.003e-43	0.04093	0.002968	380315	0.000499799	190.175
sleep duration	rs35662245	A	T	0.3389	6.229e-09	0.015	0.002582	383729	8.79442e-05	33.7495
sleep duration	rs12463754	G	C	0.2706	3.913e-10	0.01734	0.002771	378409	0.000103471	39.1582
sleep duration	rs4688116	G	T	0.4033	4.201e-08	-0.01375	0.002508	377756	7.95618e-05	30.0572
sleep duration	rs16834426	A	G	0.2685	1.757e-08	0.01557	0.002763	381303	8.32739e-05	31.7551
sleep duration	rs9843801	C	T	0.3414	5.82e-10	0.01601	0.002584	382332	0.000100395	38.388
sleep duration	rs2192528	A	G	0.4772	6.266e-10	0.01516	0.002452	383203	9.97436e-05	38.2257
sleep duration	rs7686205	G	A	0.3794	1.368e-08	0.0143	0.002519	382303	8.42891e-05	32.2265
sleep duration	rs41501452	G	A	0.3155	4.043e-09	-0.01549	0.002633	382278	9.05279e-05	34.6098
sleep duration	rs17285646	A	T	0.4764	1.884e-08	0.01379	0.002452	384036	8.23531e-05	31.629
sleep duration	rs13109404	G	T	0.07041	1.126e-11	-0.03256	0.004795	381185	0.000120949	46.1094
sleep duration	rs365663	G	A	0.4551	1.116e-11	-0.01672	0.002462	381797	0.000120785	46.1205
sleep duration	rs6889592	A	G	0.3324	1.437e-11	0.01754	0.002596	383312	0.000119082	45.6507
sleep duration	rs113322698	A	G	0.3424	1.937e-08	0.01446	0.002574	383856	8.22083e-05	31.5586
sleep duration	rs34388845	G	A	0.2136	5.431e-10	-0.01851	0.002983	384007	0.000100259	38.5038
sleep duration	rs9451146	T	C	0.228	8.528e-09	-0.01678	0.002915	381987	8.67402e-05	33.1363
sleep duration	rs9362971	C	T	0.3461	1.411e-08	-0.01456	0.002567	384256	8.37171e-05	32.1713
sleep duration	rs3823624	C	T	0.1807	1.297e-09	0.01934	0.003188	381220	9.65292e-05	36.8022
sleep duration	rs6979198	G	T	0.2109	1.071e-08	0.01716	0.003	382851	8.54526e-05	32.7182
sleep duration	rs1668331	T	G	0.3738	5.198e-10	-0.01578	0.00254	380622	0.000101393	38.5962
sleep duration	rs12336359	C	G	0.4037	9.419e-09	0.01448	0.002523	373823	8.81046e-05	32.9382
sleep duration	rs10973207	T	G	0.1549	2.015e-09	0.02033	0.003391	380640	9.44199e-05	35.9432
sleep duration	rs144625846	G	A	0.1346	1.049e-08	-0.02046	0.003575	383973	8.52946e-05	32.7534
sleep duration	rs7915425	T	C	0.1758	3.083e-10	0.02028	0.003221	382922	0.000103514	39.6417
sleep duration	rs7115856	C	A	0.4613	1.247e-09	0.01489	0.002452	384172	9.59801e-05	36.8762
sleep duration	rs12791153	T	A	0.07724	2.893e-08	0.0256	0.004614	377763	8.14836e-05	30.7838
sleep duration	rs1553132	G	A	0.2586	6.633e-09	0.01617	0.002788	383681	8.7665e-05	33.6382
sleep duration	rs1263056	G	A	0.4817	4.154e-08	-0.01355	0.002471	376641	7.98309e-05	30.0698
sleep duration	rs4767550	G	A	0.4128	2.698e-09	0.01492	0.002507	376774	9.39955e-05	35.4182
sleep duration	rs11621908	T	C	0.07962	4.954e-09	-0.0266	0.004548	377525	9.06019e-05	34.2074
sleep duration	rs13329140	A	G	0.2359	7.507e-11	-0.0188	0.002888	380669	0.000111308	42.3759
sleep duration	rs77684884	G	A	0.1878	5.826e-10	0.0198	0.003197	367710	0.000104302	38.3568
sleep duration	rs28651105	G	A	0.2165	4.748e-08	0.01621	0.002969	383376	7.77476e-05	29.8087
sleep duration	rs8047587	T	G	0.4396	1.089e-12	-0.01757	0.002468	382117	0.000132617	50.6817
sleep duration	rs11076146	G	T	0.44	2.956e-09	0.0146	0.002461	383283	9.1817e-05	35.1949
sleep duration	rs11654671	T	A	0.2348	3.714e-08	0.01611	0.002928	371729	8.14305e-05	30.2724
sleep duration	rs11650677	A	G	0.3394	8.95e-09	0.01484	0.00258	383894	8.61747e-05	33.0846
sleep duration	rs7210219	C	T	0.219	5.776e-09	-0.01754	0.003012	368945	9.19068e-05	33.9115
sleep duration	rs12607679	C	T	0.2595	9.794e-11	-0.01825	0.002821	374750	0.000111668	41.8521
morningness	rs61773390	T	G	0.1955	5.34e-20	0.02584	0.002822	345552	0.000242578	83.8433
morningness	rs17448682	T	C	0.2315	1.745e-09	0.01598	0.002654	344165	0.000105327	36.2534
morningness	rs10916866	C	A	0.4113	3.968e-12	0.01614	0.002326	329704	0.000146016	48.1487
morningness	rs12140153	T	G	0.0877	1.036e-11	-0.02743	0.004033	333937	0.000138507	46.2586
morningness	rs10518440	G	A	0.1606	2.066e-24	0.03102	0.003042	345489	0.000300885	103.983
morningness	rs72720396	G	A	0.2294	4.36e-17	0.02232	0.002656	345552	0.000204329	70.6203
morningness	rs34571177	G	T	0.1791	2.681e-09	-0.01737	0.002919	344673	0.000102726	35.4102
morningness	rs2794682	T	C	0.396	9.338e-14	0.017	0.002282	345412	0.000160642	55.4963
morningness	rs13306728	G	A	0.07612	6.527e-10	-0.02604	0.004215	344114	0.000110901	38.1667
morningness	rs13011556	G	C	0.2378	2.803e-10	0.01663	0.002635	343703	0.000115875	39.831
morningness	rs2712056	T	C	0.1845	1.937e-08	0.01619	0.002882	344811	9.15134e-05	31.5575
morningness	rs2592199	G	C	0.2307	1.351e-14	-0.02053	0.002666	342110	0.000173307	59.3001
morningness	rs10495976	T	A	0.3886	2.032e-11	0.01557	0.002322	337048	0.000133384	44.9625
morningness	rs138371731	T	C	0.07938	2.587e-08	0.02309	0.004148	344118	9.00376e-05	30.9862
morningness	rs7598252	G	A	0.4718	1.998e-08	-0.01277	0.002276	333879	9.42773e-05	31.48
morningness	rs812925	G	C	0.3521	1.05e-10	0.01511	0.00234	345098	0.00012081	41.696
morningness	rs7586062	C	G	0.4717	4.01e-19	-0.02028	0.00227	336751	0.000236959	79.8145
morningness	rs75863239	C	T	0.09024	3.211e-08	0.02161	0.003908	345552	8.84807e-05	30.5772
morningness	rs62172117	A	G	0.3572	1.08e-11	-0.01591	0.002341	342475	0.00013485	46.1886
morningness	rs4549082	C	T	0.4845	3.612e-14	0.017	0.002244	343725	0.000166943	57.3918
morningness	rs138964083	T	C	0.05823	4.821e-09	0.02795	0.004775	344900	9.933e-05	34.2621
morningness	rs11900963	T	A	0.08624	4.489e-24	-0.04038	0.00399	344992	0.00029679	102.42
morningness	rs62182115	T	C	0.3415	1.042e-08	-0.01351	0.00236	344318	9.51668e-05	32.7706
morningness	rs13081924	T	C	0.127	2.144e-08	-0.01897	0.003387	340157	9.22114e-05	31.3691
morningness	rs75729494	A	T	0.08506	7.005e-10	0.02475	0.004014	343274	0.000110741	38.0183
morningness	rs73095857	T	G	0.4241	3.515e-09	0.01337	0.002264	344458	0.000101235	34.8745
morningness	rs4622900	C	T	0.4436	2.987e-08	-0.0125	0.002256	343950	8.92499e-05	30.7001
morningness	rs1109088	G	A	0.4262	2.088e-08	-0.01288	0.002297	333643	9.42295e-05	31.4418
morningness	rs4856739	C	A	0.4808	2.912e-09	0.01329	0.002239	345171	0.000102062	35.2322
morningness	rs57453263	T	A	0.3144	1.407e-08	-0.01366	0.002408	345025	9.32604e-05	32.18
morningness	rs6778003	T	G	0.2941	6.052e-10	0.01523	0.002461	343514	0.000111477	38.2978
morningness	rs28634184	T	C	0.251	3.966e-08	-0.01421	0.002587	344075	8.76807e-05	30.1712
morningness	rs35376824	G	A	0.2329	1.116e-09	-0.01609	0.002642	345503	0.000107337	37.0889
morningness	rs4241964	G	T	0.4752	1.413e-12	0.01603	0.002263	338009	0.000148424	50.1759
morningness	rs72693015	C	G	0.2107	3.115e-08	0.01522	0.00275	344065	8.90194e-05	30.631
morningness	rs7701529	A	T	0.2355	6.44e-09	-0.01544	0.00266	338545	9.95111e-05	33.6922
morningness	rs13167796	A	G	0.248	1.672e-08	-0.0147	0.002604	341120	9.34125e-05	31.8677
morningness	rs12054920	T	C	0.4774	3.953e-12	-0.01556	0.002242	344635	0.000139742	48.1665
morningness	rs77960	A	G	0.3271	1.22e-08	0.01362	0.002391	342035	9.486e-05	32.4483
morningness	rs67988891	G	C	0.3183	2.35e-15	0.01908	0.002409	343895	0.00018238	62.7308
morningness	rs9395520	T	C	0.3042	1.587e-13	0.01797	0.002435	345042	0.000157818	54.4623
morningness	rs3130277	C	G	0.2338	1.131e-08	0.01512	0.002648	344420	9.46538e-05	32.6036
morningness	rs3798519	C	A	0.1799	1.152e-08	0.01664	0.002915	345001	9.44426e-05	32.5857
morningness	rs2653349	A	G	0.213	4.498e-27	0.02946	0.002734	345552	0.000335899	116.109
morningness	rs2881955	T	C	0.2777	8.594e-09	0.01443	0.002506	342853	9.66987e-05	33.1564
morningness	rs35101255	G	A	0.07921	3.449e-09	-0.02446	0.00414	345505	0.000101022	34.9068
morningness	rs12206116	A	G	0.4024	4.4e-08	0.01258	0.002299	339382	8.82178e-05	29.942
morningness	rs9348050	T	C	0.4891	3.439e-09	0.01327	0.002245	342087	0.000102124	34.9387
morningness	rs16873715	T	A	0.2436	4.418e-08	0.01429	0.00261	344109	8.71063e-05	29.9765
morningness	rs56049037	A	G	0.2874	1.642e-10	-0.01591	0.002489	340122	0.000120117	40.859
morningness	rs4245555	C	T	0.4128	6.129e-14	0.01733	0.002309	334682	0.000168284	56.3309
morningness	rs202157	C	T	0.2981	4.417e-15	0.01926	0.002456	341962	0.000179804	61.4969
morningness	rs735459	C	T	0.3571	5.247e-11	0.01552	0.002364	335881	0.000128306	43.1009
morningness	rs7783012	G	A	0.4084	1.09e-09	-0.01397	0.002292	341989	0.000108619	37.1502
morningness	rs4588790	T	C	0.3826	1.843e-08	-0.01297	0.002306	342692	9.23033e-05	31.6343
morningness	rs2971970	T	G	0.2177	6.192e-10	0.0168	0.002716	344187	0.000111152	38.261
morningness	rs36117029	G	A	0.3558	3.76e-08	0.01294	0.002352	340147	8.89792e-05	30.2685
morningness	rs7387133	C	G	0.4347	2.246e-12	0.01586	0.00226	343944	0.000143166	49.2478
morningness	rs6990077	T	C	0.2199	7.897e-12	-0.01853	0.002709	343533	0.000136177	46.7875
morningness	rs34578339	T	A	0.157	3.116e-08	0.01706	0.003083	343184	8.92165e-05	30.6202
morningness	rs3100052	A	G	0.3874	4.347e-08	0.01258	0.002296	345552	8.68693e-05	30.0203
morningness	rs3808477	T	C	0.2795	3.298e-12	0.01738	0.002495	344443	0.000140857	48.5239
morningness	rs1323591	T	C	0.3243	1.638e-09	-0.01426	0.002364	345552	0.000105289	36.3866
morningness	rs2291589	G	T	0.3774	8.129e-13	-0.01652	0.002308	344811	0.00014856	51.2325
morningness	rs28458909	T	C	0.1224	1.948e-16	-0.02806	0.003411	345552	0.0001958	67.6721
morningness	rs11004141	T	C	0.1408	1.075e-08	-0.01838	0.003213	345226	9.47818e-05	32.724
morningness	rs9795439	A	G	0.1963	6.68e-09	0.01633	0.002817	345552	9.72396e-05	33.6044
morningness	rs11032362	A	G	0.09112	1.294e-12	0.02754	0.003882	345552	0.000145626	50.3285
morningness	rs34239319	T	G	0.1018	9.673e-10	0.02259	0.003694	344969	0.000108396	37.3969
morningness	rs7925560	A	G	0.2315	6.535e-11	-0.01733	0.002654	345396	0.000123431	42.6376
morningness	rs4936289	G	A	0.3842	1.327e-08	0.01308	0.002302	345552	9.34224e-05	32.2851
morningness	rs74357745	G	A	0.1203	6.757e-10	-0.02126	0.003444	344937	0.000110462	38.1064
morningness	rs35935113	C	T	0.4458	3.592e-08	-0.01243	0.002256	343383	8.83989e-05	30.3572
morningness	rs7308565	T	C	0.4048	2.145e-09	0.01393	0.002327	331790	0.000107994	35.835
morningness	rs11181153	C	T	0.4129	5.702e-14	0.0171	0.002276	344409	0.000163871	56.4476
morningness	rs7313852	A	G	0.435	2.523e-23	-0.02256	0.002267	342625	0.000288955	99.0313
morningness	rs11174780	A	G	0.1217	2.536e-09	-0.02038	0.00342	344625	0.00010303	35.5102
morningness	rs7959983	C	T	0.4041	3.168e-11	0.01511	0.002275	343939	0.000128242	44.1127
morningness	rs7304278	A	G	0.275	3.591e-09	-0.0149	0.002524	340675	0.000102284	34.8491
morningness	rs80097534	T	G	0.09525	7.17e-09	-0.02221	0.003837	340924	9.82683e-05	33.5051
morningness	rs9597250	A	C	0.188	6.117e-10	-0.01778	0.002874	341520	0.000112053	38.2726
morningness	rs17697212	C	T	0.1996	1.015e-08	-0.01618	0.002824	339586	9.66576e-05	32.8265
morningness	rs12431576	C	T	0.326	7.626e-10	-0.01479	0.002404	340609	0.000111113	37.8499
morningness	rs4899502	G	A	0.3131	1.834e-08	0.01356	0.002411	345552	9.15318e-05	31.6317
morningness	rs4550384	G	T	0.243	2.486e-08	-0.01458	0.002615	341987	9.08914e-05	31.0863
morningness	rs2701524	C	T	0.4129	4.363e-08	-0.01259	0.002299	337642	8.88134e-05	29.9896
morningness	rs7196720	T	C	0.486	2.228e-08	0.01254	0.002241	343867	9.10503e-05	31.3119
morningness	rs12927162	G	A	0.2763	9.888e-21	-0.02337	0.002503	345552	0.000252216	87.1753
morningness	rs1421085	C	T	0.4039	4.076e-21	0.02151	0.002281	345552	0.000257279	88.9258
morningness	rs4784655	C	G	0.3218	2.129e-12	-0.0169	0.002405	343314	0.00014381	49.3788
morningness	rs112439757	T	C	0.1801	6.569e-14	-0.02186	0.002916	345006	0.000162865	56.1982
morningness	rs4792268	G	A	0.08104	1.748e-12	0.02893	0.004101	344956	0.000144242	49.7639
morningness	rs2232839	T	C	0.2113	4.811e-14	-0.02106	0.002794	332458	0.000170865	56.8148
morningness	rs8072507	C	T	0.2855	1.365e-09	0.01502	0.002479	345552	0.000106225	36.71
morningness	rs2916142	T	C	0.4565	4.413e-09	0.01349	0.002299	330563	0.000104147	34.4305
morningness	rs974552	G	A	0.1915	1.479e-11	0.01919	0.002843	344864	0.000132096	45.561
morningness	rs11083105	A	G	0.4029	2.194e-08	-0.01292	0.002309	336160	9.31302e-05	31.3094
morningness	rs4239386	A	T	0.3342	1.612e-10	-0.01521	0.002378	342432	0.000119456	40.9103
morningness	rs55910701	T	C	0.2364	1.054e-11	-0.01792	0.002635	344910	0.000134076	46.2501
morningness	rs12956276	A	G	0.3549	1.454e-08	0.01316	0.002322	345552	9.29466e-05	32.1207
morningness	rs9964420	A	C	0.301	2.459e-16	-0.02015	0.002458	340503	0.000197324	67.2022
morningness	rs56076457	C	T	0.4708	1.584e-08	-0.01266	0.002241	345302	9.24154e-05	31.914
morningness	rs10402849	T	C	0.2008	4.97e-08	0.01524	0.002795	344738	8.62342e-05	29.7306
morningness	rs6131942	A	G	0.4196	2.31e-09	-0.01363	0.002281	340191	0.000104948	35.7058
morningness	rs139911	C	T	0.4237	9.941e-16	0.01825	0.002274	341753	0.00018843	64.4084
ease of gettingup	rs61773374	G	A	0.195	3.37e-14	0.01645	0.002169	384983	0.000149385	57.5189
ease of gettingup	rs301806	C	T	0.4208	4.734e-08	-0.009518	0.001743	385471	7.7352e-05	29.8191
ease of gettingup	rs77576965	T	C	0.2727	1.938e-08	0.01088	0.001936	382641	8.25315e-05	31.5824
ease of gettingup	rs12752290	C	T	0.4421	1.024e-12	0.01245	0.001747	378354	0.000134214	50.7868
ease of gettingup	rs113240734	A	G	0.1601	2.174e-16	0.0192	0.002338	385908	0.000174724	67.439
ease of gettingup	rs76048411	T	C	0.4833	8.526e-10	0.01056	0.001722	384818	9.77156e-05	37.6062
ease of gettingup	rs2053457	C	T	0.2465	1.287e-15	-0.01597	0.001997	383328	0.000166806	63.9516
ease of gettingup	rs2037387	T	C	0.4196	3.038e-09	0.01039	0.001752	380549	9.24086e-05	35.169
ease of gettingup	rs4671328	T	G	0.4478	1.064e-09	0.01068	0.001751	375167	9.91522e-05	37.2021
ease of gettingup	rs10175975	T	C	0.179	3.303e-09	0.01337	0.00226	378509	9.24548e-05	34.998
ease of gettingup	rs406952	C	T	0.3765	1.196e-08	0.01012	0.001775	384773	8.4474e-05	32.5059
ease of gettingup	rs4853283	G	A	0.4401	1.841e-16	-0.01427	0.001734	384317	0.000176191	67.7248
ease of gettingup	rs1606803	T	C	0.2871	3.216e-10	0.01194	0.001898	385254	0.000102713	39.5744
ease of gettingup	rs4483990	C	A	0.1549	6.402e-13	-0.01716	0.002386	382316	0.000135273	51.7239
ease of gettingup	rs13116306	T	C	0.42	1.758e-08	-0.009924	0.001761	375829	8.44944e-05	31.758
ease of gettingup	rs10470887	G	A	0.4874	4.049e-08	-0.009496	0.00173	382194	7.88263e-05	30.1292
ease of gettingup	rs9995419	A	G	0.2369	1.504e-08	0.01144	0.002021	385651	8.30785e-05	32.0418
ease of gettingup	rs79751662	C	G	0.1067	2.324e-08	-0.01557	0.002787	383982	8.1275e-05	31.2105
ease of gettingup	rs1459192	T	C	0.3288	2.495e-08	-0.01023	0.001835	382325	8.12851e-05	31.0797
ease of gettingup	rs12515274	A	G	0.2523	5.368e-10	-0.01227	0.001977	385045	0.000100028	38.5189
ease of gettingup	rs4958316	A	C	0.2883	3.693e-15	0.01495	0.0019	384027	0.000161192	61.9117
ease of gettingup	rs553108	A	G	0.4159	3.119e-08	0.009703	0.001753	383176	7.99494e-05	30.637
ease of gettingup	rs2653349	A	G	0.213	8.454e-29	0.02339	0.0021	385949	0.000321331	124.057
ease of gettingup	rs9399613	T	C	0.2861	1.321e-08	-0.01093	0.001923	376795	8.57313e-05	32.3057
ease of gettingup	rs3735478	T	G	0.2908	1.568e-08	-0.01069	0.00189	385949	8.28831e-05	31.9911
ease of gettingup	rs2944822	T	C	0.4452	4.425e-09	0.01014	0.001728	385949	8.92113e-05	34.4339
ease of gettingup	rs16917522	C	T	0.1827	1.117e-09	0.01355	0.002225	385719	9.61404e-05	37.0865
ease of gettingup	rs72663537	G	T	0.1295	2.759e-08	-0.01428	0.002571	381104	8.09419e-05	30.8496
ease of gettingup	rs77641763	T	C	0.122	1.975e-11	-0.0176	0.002624	385109	0.000116805	44.9879
ease of gettingup	rs4962716	T	C	0.1258	1.819e-09	-0.01565	0.002603	381190	9.48195e-05	36.1475
ease of gettingup	rs11229264	A	G	0.2982	1.429e-10	-0.01216	0.001895	376911	0.000109235	41.1762
ease of gettingup	rs7297799	T	C	0.3989	1.208e-12	-0.01276	0.001796	367589	0.000137299	50.4762
ease of gettingup	rs2193749	T	C	0.4947	1.841e-08	-0.009704	0.001725	382987	8.26235e-05	31.6462
ease of gettingup	rs6581138	A	G	0.2434	2.297e-10	0.01272	0.002007	384550	0.000104443	40.1677
ease of gettingup	rs74643199	T	A	0.1538	1.249e-08	-0.01373	0.002411	375821	8.62836e-05	32.4298
ease of gettingup	rs4884166	A	G	0.1984	1.151e-08	-0.01228	0.002151	385289	8.45848e-05	32.5922
ease of gettingup	rs6575012	A	G	0.4819	2.566e-08	-0.009611	0.001726	382038	8.11547e-05	31.0065
ease of gettingup	rs3935182	G	C	0.4207	6.771e-12	0.01204	0.001755	378566	0.000124309	47.0648
ease of gettingup	rs1420607	A	G	0.2713	1.572e-11	0.01308	0.00194	382503	0.00011883	45.4579
ease of gettingup	rs11642015	T	C	0.4041	6.203e-11	0.01145	0.001751	385727	0.000110844	42.7599
ease of gettingup	rs17822102	G	A	0.3437	9.396e-10	0.01105	0.001806	385568	9.70836e-05	37.4358
ease of gettingup	rs11643192	A	C	0.3893	1.297e-09	-0.01074	0.001769	382948	9.62435e-05	36.8596
ease of gettingup	rs4790352	G	A	0.08119	8.783e-09	-0.01809	0.003145	384890	8.59532e-05	33.0852
ease of gettingup	rs3760185	T	C	0.2433	4.524e-08	-0.01112	0.002034	374057	7.98979e-05	29.8886
ease of gettingup	rs12150229	G	A	0.2236	3.524e-09	0.01219	0.002064	384457	9.07195e-05	34.8807
ease of gettingup	rs77556405	A	G	0.1727	1.594e-13	0.01675	0.00227	385949	0.000141054	54.4472
ease of gettingup	rs12601968	T	G	0.3261	1.162e-09	-0.01118	0.001837	383893	9.64746e-05	37.0393
ease of gettingup	rs4395148	T	A	0.308	2.362e-08	-0.01042	0.001867	382163	8.1501e-05	31.149
ease of gettingup	rs8182491	T	C	0.1005	1.175e-09	-0.01738	0.002857	385899	9.58879e-05	37.0064
ease of gettingup	rs11697690	C	T	0.469	2.331e-08	0.009707	0.001738	378008	8.25151e-05	31.1938
ease of gettingup	rs74555583	A	G	0.08551	3.044e-08	-0.01702	0.003073	385949	7.94748e-05	30.6755

## Sheet: Table S3
Full result of MR estimates for the association of microbial taxa and pathways on sleep-related traits
Exposure_ID	Exposure_Trait	Outcome	Method	nSNP	BETA	SE	Pval	95%CI(lower)	95%CI(upper)
GCST90027446	ANAEROFRUCAT.PWY..homolactic.fermentation	insomnia	Inverse variance weighted	4	0.0130118	0.0320455	0.684711	-0.0497973	0.0758209
GCST90027446	ANAEROFRUCAT.PWY..homolactic.fermentation	insomnia	MR Egger	4	-0.0958923	0.126399	0.527278	-0.343634	0.15185
GCST90027446	ANAEROFRUCAT.PWY..homolactic.fermentation	insomnia	Weighted median	4	0.00961491	0.0379581	0.800034	-0.0647831	0.0840129
GCST90027446	ANAEROFRUCAT.PWY..homolactic.fermentation	insomnia	Weighted mode	4	-0.00873872	0.0490234	0.86988	-0.104825	0.0873472
GCST90027446	ANAEROFRUCAT.PWY..homolactic.fermentation	insomnia	Maximum likelihood	4	0.0131532	0.0322798	0.683658	-0.0501152	0.0764216
GCST90027447	ANAGLYCOLYSIS.PWY..glycolysis.III..from.glucose.	insomnia	Inverse variance weighted	9	-0.0228426	0.0214732	0.287432	-0.06493	0.0192449
GCST90027447	ANAGLYCOLYSIS.PWY..glycolysis.III..from.glucose.	insomnia	MR Egger	9	0.0341508	0.0628609	0.603802	-0.0890566	0.157358
GCST90027447	ANAGLYCOLYSIS.PWY..glycolysis.III..from.glucose.	insomnia	Weighted median	9	-0.0285676	0.0279379	0.306525	-0.0833258	0.0261906
GCST90027447	ANAGLYCOLYSIS.PWY..glycolysis.III..from.glucose.	insomnia	Weighted mode	9	-0.0486038	0.0466521	0.327946	-0.140042	0.0428343
GCST90027447	ANAGLYCOLYSIS.PWY..glycolysis.III..from.glucose.	insomnia	Maximum likelihood	9	-0.0230561	0.0218783	0.29196	-0.0659375	0.0198254
GCST90027449	ARGORNPROST.PWY..arginine..ornithine.and.proline.interconversion	insomnia	Inverse variance weighted	5	-0.00350893	0.0194396	0.856757	-0.0416105	0.0345927
GCST90027449	ARGORNPROST.PWY..arginine..ornithine.and.proline.interconversion	insomnia	MR Egger	5	0.0587414	0.0740599	0.485624	-0.0864161	0.203899
GCST90027449	ARGORNPROST.PWY..arginine..ornithine.and.proline.interconversion	insomnia	Weighted median	5	-0.00564289	0.0254389	0.824453	-0.0555032	0.0442174
GCST90027449	ARGORNPROST.PWY..arginine..ornithine.and.proline.interconversion	insomnia	Weighted mode	5	-0.0138656	0.0334103	0.699429	-0.0793499	0.0516186
GCST90027449	ARGORNPROST.PWY..arginine..ornithine.and.proline.interconversion	insomnia	Maximum likelihood	5	-0.00355299	0.0195628	0.855881	-0.0418961	0.0347901
GCST90027450	ARO.PWY..chorismate.biosynthesis.I	insomnia	Inverse variance weighted	9	0.0165897	0.023188	0.474336	-0.0288588	0.0620381
GCST90027450	ARO.PWY..chorismate.biosynthesis.I	insomnia	MR Egger	9	-0.0112855	0.11348	0.92357	-0.233707	0.211136
GCST90027450	ARO.PWY..chorismate.biosynthesis.I	insomnia	Weighted median	9	0.0193195	0.0292555	0.509015	-0.0380212	0.0766602
GCST90027450	ARO.PWY..chorismate.biosynthesis.I	insomnia	Weighted mode	9	0.030658	0.0457053	0.521255	-0.0589244	0.12024
GCST90027450	ARO.PWY..chorismate.biosynthesis.I	insomnia	Maximum likelihood	9	0.0169294	0.0232787	0.467074	-0.0286969	0.0625557
GCST90027451	ASPASN.PWY..superpathway.of.L.aspartate.and.L.asparagine.biosynthesis	insomnia	Inverse variance weighted	5	0.00232976	0.030481	0.939074	-0.057413	0.0620726
GCST90027451	ASPASN.PWY..superpathway.of.L.aspartate.and.L.asparagine.biosynthesis	insomnia	MR Egger	5	0.1236	0.138469	0.437827	-0.147799	0.395
GCST90027451	ASPASN.PWY..superpathway.of.L.aspartate.and.L.asparagine.biosynthesis	insomnia	Weighted median	5	0.00494633	0.0392201	0.899639	-0.071925	0.0818177
GCST90027451	ASPASN.PWY..superpathway.of.L.aspartate.and.L.asparagine.biosynthesis	insomnia	Weighted mode	5	0.00963586	0.0512797	0.860096	-0.0908724	0.110144
GCST90027451	ASPASN.PWY..superpathway.of.L.aspartate.and.L.asparagine.biosynthesis	insomnia	Maximum likelihood	5	0.00235755	0.0306353	0.938659	-0.0576876	0.0624027
GCST90027452	AST.PWY..L.arginine.degradation.II..AST.pathway.	insomnia	Inverse variance weighted	5	-0.00247032	0.0177003	0.889004	-0.0371628	0.0322222
GCST90027452	AST.PWY..L.arginine.degradation.II..AST.pathway.	insomnia	MR Egger	5	0.0322959	0.0929671	0.751241	-0.14992	0.214511
GCST90027452	AST.PWY..L.arginine.degradation.II..AST.pathway.	insomnia	Weighted median	5	0.0033759	0.0212901	0.87401	-0.0383527	0.0451045
GCST90027452	AST.PWY..L.arginine.degradation.II..AST.pathway.	insomnia	Weighted mode	5	0.00436852	0.0281684	0.884265	-0.0508415	0.0595786
GCST90027452	AST.PWY..L.arginine.degradation.II..AST.pathway.	insomnia	Maximum likelihood	5	-0.00248543	0.0177534	0.888662	-0.0372821	0.0323112
GCST90027453	BRANCHED.CHAIN.AA.SYN.PWY..superpathway.of.branched.amino.acid.biosynthesis	insomnia	Inverse variance weighted	5	-0.00364732	0.0301122	0.903593	-0.0626673	0.0553727
GCST90027453	BRANCHED.CHAIN.AA.SYN.PWY..superpathway.of.branched.amino.acid.biosynthesis	insomnia	MR Egger	5	-0.0394567	0.268656	0.892551	-0.566022	0.487108
GCST90027453	BRANCHED.CHAIN.AA.SYN.PWY..superpathway.of.branched.amino.acid.biosynthesis	insomnia	Weighted median	5	0.00169338	0.0359045	0.962383	-0.0686795	0.0720663
GCST90027453	BRANCHED.CHAIN.AA.SYN.PWY..superpathway.of.branched.amino.acid.biosynthesis	insomnia	Weighted mode	5	0.00946331	0.0482355	0.854026	-0.0850783	0.104005
GCST90027453	BRANCHED.CHAIN.AA.SYN.PWY..superpathway.of.branched.amino.acid.biosynthesis	insomnia	Maximum likelihood	5	-0.00366397	0.0301848	0.903386	-0.0628261	0.0554982
GCST90027454	COA.PWY..coenzyme.A.biosynthesis.I	insomnia	Inverse variance weighted	9	-0.0197267	0.0232376	0.395931	-0.0652724	0.025819
GCST90027454	COA.PWY..coenzyme.A.biosynthesis.I	insomnia	MR Egger	9	0.0242433	0.0995773	0.814628	-0.170928	0.219415
GCST90027454	COA.PWY..coenzyme.A.biosynthesis.I	insomnia	Weighted median	9	-0.00812805	0.0285237	0.775676	-0.0640344	0.0477783
GCST90027454	COA.PWY..coenzyme.A.biosynthesis.I	insomnia	Weighted mode	9	-0.00306025	0.0435751	0.945735	-0.0884674	0.0823469
GCST90027454	COA.PWY..coenzyme.A.biosynthesis.I	insomnia	Maximum likelihood	9	-0.0197429	0.0234385	0.399603	-0.0656823	0.0261964
GCST90027455	COBALSYN.PWY..adenosylcobalamin.salvage.from.cobinamide.I	insomnia	Inverse variance weighted	8	0.0118233	0.0227354	0.603036	-0.032738	0.0563846
GCST90027455	COBALSYN.PWY..adenosylcobalamin.salvage.from.cobinamide.I	insomnia	MR Egger	8	0.0316805	0.0883258	0.732119	-0.141438	0.204799
GCST90027455	COBALSYN.PWY..adenosylcobalamin.salvage.from.cobinamide.I	insomnia	Weighted median	8	0.0149347	0.027339	0.584875	-0.0386498	0.0685192
GCST90027455	COBALSYN.PWY..adenosylcobalamin.salvage.from.cobinamide.I	insomnia	Weighted mode	8	0.016494	0.0395607	0.689218	-0.061045	0.0940331
GCST90027455	COBALSYN.PWY..adenosylcobalamin.salvage.from.cobinamide.I	insomnia	Maximum likelihood	8	0.0119935	0.0228653	0.599912	-0.0328225	0.0568095
GCST90027456	COLANSYN.PWY..colanic.acid.building.blocks.biosynthesis	insomnia	Inverse variance weighted	2	-0.0283413	0.0397304	0.475636	-0.106213	0.0495303
GCST90027456	COLANSYN.PWY..colanic.acid.building.blocks.biosynthesis	insomnia	Maximum likelihood	2	-0.0283411	0.0399236	0.477776	-0.106591	0.0499091
GCST90027457	COMPLETE.ARO.PWY..superpathway.of.aromatic.amino.acid.biosynthesis	insomnia	Inverse variance weighted	4	-0.0185746	0.0335575	0.57991	-0.0843474	0.0471981
GCST90027457	COMPLETE.ARO.PWY..superpathway.of.aromatic.amino.acid.biosynthesis	insomnia	MR Egger	4	-0.0458495	0.246417	0.869557	-0.528828	0.437129
GCST90027457	COMPLETE.ARO.PWY..superpathway.of.aromatic.amino.acid.biosynthesis	insomnia	Weighted median	4	-0.0135004	0.0384457	0.725473	-0.0888539	0.0618532
GCST90027457	COMPLETE.ARO.PWY..superpathway.of.aromatic.amino.acid.biosynthesis	insomnia	Weighted mode	4	-0.0124972	0.0476562	0.810114	-0.105903	0.0809089
GCST90027457	COMPLETE.ARO.PWY..superpathway.of.aromatic.amino.acid.biosynthesis	insomnia	Maximum likelihood	4	-0.0186191	0.0336532	0.580083	-0.0845794	0.0473412
GCST90027458	CRNFORCAT.PWY..creatinine.degradation.I	insomnia	Inverse variance weighted	7	-0.00661708	0.019711	0.737093	-0.0452506	0.0320164
GCST90027458	CRNFORCAT.PWY..creatinine.degradation.I	insomnia	MR Egger	7	-0.0142913	0.0654083	0.835682	-0.142492	0.113909
GCST90027458	CRNFORCAT.PWY..creatinine.degradation.I	insomnia	Weighted median	7	-0.0125037	0.0239015	0.600881	-0.0593506	0.0343432
GCST90027458	CRNFORCAT.PWY..creatinine.degradation.I	insomnia	Weighted mode	7	-0.0132658	0.0352982	0.719979	-0.0824502	0.0559186
GCST90027458	CRNFORCAT.PWY..creatinine.degradation.I	insomnia	Maximum likelihood	7	-0.00666962	0.0198094	0.73635	-0.045496	0.0321567
GCST90027459	DAPLYSINESYN.PWY..L.lysine.biosynthesis.I	insomnia	Inverse variance weighted	10	-0.00468038	0.0211543	0.824898	-0.0461429	0.0367821
GCST90027459	DAPLYSINESYN.PWY..L.lysine.biosynthesis.I	insomnia	MR Egger	10	-0.00424959	0.0702455	0.953244	-0.141931	0.133432
GCST90027459	DAPLYSINESYN.PWY..L.lysine.biosynthesis.I	insomnia	Weighted median	10	0.0111726	0.0272681	0.682002	-0.0422728	0.0646181
GCST90027459	DAPLYSINESYN.PWY..L.lysine.biosynthesis.I	insomnia	Weighted mode	10	0.0223782	0.0418424	0.605732	-0.0596329	0.104389
GCST90027459	DAPLYSINESYN.PWY..L.lysine.biosynthesis.I	insomnia	Maximum likelihood	10	-0.00477411	0.0213729	0.823246	-0.046665	0.0371168
GCST90027460	DENOVOPURINE2.PWY..superpathway.of.purine.nucleotides.de.novo.biosynthesis.II	insomnia	Inverse variance weighted	7	-0.0356986	0.0256348	0.163746	-0.0859428	0.0145456
GCST90027460	DENOVOPURINE2.PWY..superpathway.of.purine.nucleotides.de.novo.biosynthesis.II	insomnia	MR Egger	7	-0.070121	0.110796	0.554621	-0.287282	0.14704
GCST90027460	DENOVOPURINE2.PWY..superpathway.of.purine.nucleotides.de.novo.biosynthesis.II	insomnia	Weighted median	7	-0.0392898	0.0313512	0.210128	-0.100738	0.0221587
GCST90027460	DENOVOPURINE2.PWY..superpathway.of.purine.nucleotides.de.novo.biosynthesis.II	insomnia	Weighted mode	7	-0.0120859	0.0456392	0.800014	-0.101539	0.0773669
GCST90027460	DENOVOPURINE2.PWY..superpathway.of.purine.nucleotides.de.novo.biosynthesis.II	insomnia	Maximum likelihood	7	-0.0359038	0.0259064	0.165777	-0.0866805	0.0148728
GCST90027461	DTDPRHAMSYN.PWY..dTDP.L.rhamnose.biosynthesis.I	insomnia	Inverse variance weighted	6	-0.0188592	0.0278622	0.498485	-0.0734691	0.0357507
GCST90027461	DTDPRHAMSYN.PWY..dTDP.L.rhamnose.biosynthesis.I	insomnia	MR Egger	6	-0.07288	0.102396	0.51593	-0.273575	0.127815
GCST90027461	DTDPRHAMSYN.PWY..dTDP.L.rhamnose.biosynthesis.I	insomnia	Weighted median	6	-0.016359	0.0327894	0.617842	-0.0806263	0.0479083
GCST90027461	DTDPRHAMSYN.PWY..dTDP.L.rhamnose.biosynthesis.I	insomnia	Weighted mode	6	-0.00777842	0.0498639	0.882141	-0.105512	0.0899548
GCST90027461	DTDPRHAMSYN.PWY..dTDP.L.rhamnose.biosynthesis.I	insomnia	Maximum likelihood	6	-0.0190025	0.0280372	0.497924	-0.0739553	0.0359504
GCST90027462	ECASYN.PWY..enterobacterial.common.antigen.biosynthesis	insomnia	Inverse variance weighted	12	0.000103508	0.00942424	0.991237	-0.018368	0.018575
GCST90027462	ECASYN.PWY..enterobacterial.common.antigen.biosynthesis	insomnia	MR Egger	12	-0.00826898	0.0499166	0.871729	-0.106106	0.0895676
GCST90027462	ECASYN.PWY..enterobacterial.common.antigen.biosynthesis	insomnia	Weighted median	12	0.000952162	0.0109971	0.931003	-0.0206021	0.0225064
GCST90027462	ECASYN.PWY..enterobacterial.common.antigen.biosynthesis	insomnia	Weighted mode	12	2.11744e-05	0.0180798	0.999087	-0.0354152	0.0354576
GCST90027462	ECASYN.PWY..enterobacterial.common.antigen.biosynthesis	insomnia	Maximum likelihood	12	0.000103985	0.00945453	0.991225	-0.0184269	0.0186349
GCST90027464	FAO.PWY..fatty.acid..beta..oxidation.I	insomnia	Inverse variance weighted	7	-0.00294662	0.0205774	0.886134	-0.0432783	0.037385
GCST90027464	FAO.PWY..fatty.acid..beta..oxidation.I	insomnia	MR Egger	7	-0.031898	0.0829665	0.71644	-0.194512	0.130716
GCST90027464	FAO.PWY..fatty.acid..beta..oxidation.I	insomnia	Weighted median	7	-3.88217e-05	0.025977	0.998808	-0.0509538	0.0508762
GCST90027464	FAO.PWY..fatty.acid..beta..oxidation.I	insomnia	Weighted mode	7	-0.00321471	0.0363918	0.932484	-0.0745426	0.0681132
GCST90027464	FAO.PWY..fatty.acid..beta..oxidation.I	insomnia	Maximum likelihood	7	-0.00296372	0.0206467	0.88586	-0.0434312	0.0375038
GCST90027465	FERMENTATION.PWY..mixed.acid.fermentation	insomnia	Inverse variance weighted	8	0.0100805	0.0196057	0.60714	-0.0283467	0.0485077
GCST90027465	FERMENTATION.PWY..mixed.acid.fermentation	insomnia	MR Egger	8	0.037778	0.103142	0.72673	-0.16438	0.239936
GCST90027465	FERMENTATION.PWY..mixed.acid.fermentation	insomnia	Weighted median	8	0.00284758	0.0245488	0.907655	-0.045268	0.0509631
GCST90027465	FERMENTATION.PWY..mixed.acid.fermentation	insomnia	Weighted mode	8	-0.0152975	0.0378339	0.698036	-0.089452	0.0588569
GCST90027465	FERMENTATION.PWY..mixed.acid.fermentation	insomnia	Maximum likelihood	8	0.0102126	0.0197834	0.605701	-0.0285629	0.0489882
GCST90027466	FUCCAT.PWY..fucose.degradation	insomnia	Inverse variance weighted	9	0.00119245	0.0215991	0.955972	-0.0411418	0.0435267
GCST90027466	FUCCAT.PWY..fucose.degradation	insomnia	MR Egger	9	0.0139025	0.0741347	0.856565	-0.131401	0.159206
GCST90027466	FUCCAT.PWY..fucose.degradation	insomnia	Weighted median	9	0	0.0272644	1	-0.0534382	0.0534382
GCST90027466	FUCCAT.PWY..fucose.degradation	insomnia	Weighted mode	9	0.000865999	0.0390972	0.982871	-0.0757644	0.0774964
GCST90027466	FUCCAT.PWY..fucose.degradation	insomnia	Maximum likelihood	9	0.00119858	0.0216968	0.955945	-0.0413271	0.0437242
GCST90027467	FUC.RHAMCAT.PWY..superpathway.of.fucose.and.rhamnose.degradation	insomnia	Inverse variance weighted	7	0.00507733	0.0172677	0.76873	-0.0287674	0.0389221
GCST90027467	FUC.RHAMCAT.PWY..superpathway.of.fucose.and.rhamnose.degradation	insomnia	MR Egger	7	0.0240703	0.070283	0.745919	-0.113684	0.161825
GCST90027467	FUC.RHAMCAT.PWY..superpathway.of.fucose.and.rhamnose.degradation	insomnia	Weighted median	7	0.00134103	0.021103	0.949331	-0.0400209	0.042703
GCST90027467	FUC.RHAMCAT.PWY..superpathway.of.fucose.and.rhamnose.degradation	insomnia	Weighted mode	7	0.00265205	0.0277954	0.927093	-0.0518269	0.057131
GCST90027467	FUC.RHAMCAT.PWY..superpathway.of.fucose.and.rhamnose.degradation	insomnia	Maximum likelihood	7	0.00515699	0.0174064	0.767024	-0.0289595	0.0392735
GCST90027468	GALACTARDEG.PWY..D.galactarate.degradation.I	insomnia	Inverse variance weighted	5	0.0161187	0.0177599	0.364095	-0.0186907	0.050928
GCST90027468	GALACTARDEG.PWY..D.galactarate.degradation.I	insomnia	MR Egger	5	0.0415842	0.0985733	0.701532	-0.151619	0.234788
GCST90027468	GALACTARDEG.PWY..D.galactarate.degradation.I	insomnia	Weighted median	5	0.0160353	0.0219174	0.464398	-0.0269228	0.0589934
GCST90027468	GALACTARDEG.PWY..D.galactarate.degradation.I	insomnia	Weighted mode	5	0.0163414	0.0283737	0.595511	-0.039271	0.0719539
GCST90027468	GALACTARDEG.PWY..D.galactarate.degradation.I	insomnia	Maximum likelihood	5	0.016205	0.017879	0.364739	-0.0188378	0.0512478
GCST90027469	GALACT.GLUCUROCAT.PWY..superpathway.of.hexuronide.and.hexuronate.degradation	insomnia	Inverse variance weighted	8	-0.00824043	0.0238556	0.729772	-0.0549975	0.0385166
GCST90027469	GALACT.GLUCUROCAT.PWY..superpathway.of.hexuronide.and.hexuronate.degradation	insomnia	MR Egger	8	-0.0194374	0.104601	0.858706	-0.224456	0.185581
GCST90027469	GALACT.GLUCUROCAT.PWY..superpathway.of.hexuronide.and.hexuronate.degradation	insomnia	Weighted median	8	0.0020001	0.0293324	0.945636	-0.0554914	0.0594916
GCST90027469	GALACT.GLUCUROCAT.PWY..superpathway.of.hexuronide.and.hexuronate.degradation	insomnia	Weighted mode	8	0.00739556	0.0413757	0.863204	-0.0737009	0.088492
GCST90027469	GALACT.GLUCUROCAT.PWY..superpathway.of.hexuronide.and.hexuronate.degradation	insomnia	Maximum likelihood	8	-0.00830128	0.0239593	0.728986	-0.0552615	0.0386589
GCST90027470	GALACTUROCAT.PWY..D.galacturonate.degradation.I	insomnia	Inverse variance weighted	6	-0.0154505	0.0280275	0.581455	-0.0703844	0.0394835
GCST90027470	GALACTUROCAT.PWY..D.galacturonate.degradation.I	insomnia	MR Egger	6	0.0445994	0.279319	0.880878	-0.502866	0.592065
GCST90027470	GALACTUROCAT.PWY..D.galacturonate.degradation.I	insomnia	Weighted median	6	-0.0188793	0.0327605	0.564425	-0.0830898	0.0453313
GCST90027470	GALACTUROCAT.PWY..D.galacturonate.degradation.I	insomnia	Weighted mode	6	-0.0223273	0.0465266	0.651568	-0.113519	0.0688649
GCST90027470	GALACTUROCAT.PWY..D.galacturonate.degradation.I	insomnia	Maximum likelihood	6	-0.0155702	0.0281657	0.580396	-0.070775	0.0396346
GCST90027471	GLCMANNANAUT.PWY..superpathway.of.N.acetylglucosamine..N.acetylmannosamine.and.N.acetylneuraminate.degradation	insomnia	Inverse variance weighted	6	-0.0182977	0.0267467	0.493906	-0.0707212	0.0341259
GCST90027471	GLCMANNANAUT.PWY..superpathway.of.N.acetylglucosamine..N.acetylmannosamine.and.N.acetylneuraminate.degradation	insomnia	MR Egger	6	-0.0333477	0.116131	0.788254	-0.260964	0.194269
GCST90027471	GLCMANNANAUT.PWY..superpathway.of.N.acetylglucosamine..N.acetylmannosamine.and.N.acetylneuraminate.degradation	insomnia	Weighted median	6	-0.0149784	0.0315913	0.635408	-0.0768973	0.0469406
GCST90027471	GLCMANNANAUT.PWY..superpathway.of.N.acetylglucosamine..N.acetylmannosamine.and.N.acetylneuraminate.degradation	insomnia	Weighted mode	6	-0.0123359	0.0437794	0.789406	-0.0981435	0.0734716
GCST90027471	GLCMANNANAUT.PWY..superpathway.of.N.acetylglucosamine..N.acetylmannosamine.and.N.acetylneuraminate.degradation	insomnia	Maximum likelihood	6	-0.0183642	0.0268456	0.493933	-0.0709816	0.0342532
GCST90027473	GLUCONEO.PWY..gluconeogenesis.I	insomnia	Inverse variance weighted	4	-0.0109045	0.0317744	0.731459	-0.0731823	0.0513733
GCST90027473	GLUCONEO.PWY..gluconeogenesis.I	insomnia	MR Egger	4	-0.0553877	0.0892801	0.598278	-0.230377	0.119601
GCST90027473	GLUCONEO.PWY..gluconeogenesis.I	insomnia	Weighted median	4	-0.00776666	0.0383286	0.839421	-0.0828907	0.0673573
GCST90027473	GLUCONEO.PWY..gluconeogenesis.I	insomnia	Weighted mode	4	0.00899129	0.0445693	0.853027	-0.0783645	0.096347
GCST90027473	GLUCONEO.PWY..gluconeogenesis.I	insomnia	Maximum likelihood	4	-0.0110084	0.0319626	0.730535	-0.0736551	0.0516384
GCST90027474	GLUCOSE1PMETAB.PWY..glucose.and.glucose.1.phosphate.degradation	insomnia	Inverse variance weighted	6	0.00110757	0.0198138	0.955422	-0.0377275	0.0399426
GCST90027474	GLUCOSE1PMETAB.PWY..glucose.and.glucose.1.phosphate.degradation	insomnia	MR Egger	6	-0.00139944	0.0861683	0.98782	-0.170289	0.167491
GCST90027474	GLUCOSE1PMETAB.PWY..glucose.and.glucose.1.phosphate.degradation	insomnia	Weighted median	6	0.00274481	0.0234141	0.906678	-0.0431467	0.0486364
GCST90027474	GLUCOSE1PMETAB.PWY..glucose.and.glucose.1.phosphate.degradation	insomnia	Weighted mode	6	0.00252065	0.033154	0.942345	-0.0624613	0.0675026
GCST90027474	GLUCOSE1PMETAB.PWY..glucose.and.glucose.1.phosphate.degradation	insomnia	Maximum likelihood	6	0.00111429	0.0198665	0.955271	-0.037824	0.0400526
GCST90027475	GLYCOCAT.PWY..glycogen.degradation.I..bacterial.	insomnia	Inverse variance weighted	8	-0.00884884	0.019622	0.652014	-0.047308	0.0296103
GCST90027475	GLYCOCAT.PWY..glycogen.degradation.I..bacterial.	insomnia	MR Egger	8	-0.0427262	0.10741	0.704556	-0.25325	0.167798
GCST90027475	GLYCOCAT.PWY..glycogen.degradation.I..bacterial.	insomnia	Weighted median	8	-0.00649968	0.0247728	0.793035	-0.0550544	0.042055
GCST90027475	GLYCOCAT.PWY..glycogen.degradation.I..bacterial.	insomnia	Weighted mode	8	-0.00532251	0.0348191	0.88282	-0.0735679	0.0629229
GCST90027475	GLYCOCAT.PWY..glycogen.degradation.I..bacterial.	insomnia	Maximum likelihood	8	-0.00889906	0.0196955	0.651391	-0.0475023	0.0297042
GCST90027476	GLYCOGENSYNTH.PWY..glycogen.biosynthesis.I..from.ADP.D.Glucose.	insomnia	Inverse variance weighted	8	-0.002558	0.0241636	0.915692	-0.0499186	0.0448026
GCST90027476	GLYCOGENSYNTH.PWY..glycogen.biosynthesis.I..from.ADP.D.Glucose.	insomnia	MR Egger	8	-0.0655432	0.0816565	0.452778	-0.22559	0.0945034
GCST90027476	GLYCOGENSYNTH.PWY..glycogen.biosynthesis.I..from.ADP.D.Glucose.	insomnia	Weighted median	8	-0.0032095	0.0304132	0.915955	-0.0628193	0.0564003
GCST90027476	GLYCOGENSYNTH.PWY..glycogen.biosynthesis.I..from.ADP.D.Glucose.	insomnia	Weighted mode	8	-0.00638384	0.0417616	0.882819	-0.0882366	0.075469
GCST90027476	GLYCOGENSYNTH.PWY..glycogen.biosynthesis.I..from.ADP.D.Glucose.	insomnia	Maximum likelihood	8	-0.00257347	0.0242426	0.91546	-0.0500889	0.044942
GCST90027477	GLYCOL.GLYOXDEG.PWY..superpathway.of.glycol.metabolism.and.degradation	insomnia	Inverse variance weighted	12	0.000769898	0.0113573	0.945954	-0.0214905	0.0230303
GCST90027477	GLYCOL.GLYOXDEG.PWY..superpathway.of.glycol.metabolism.and.degradation	insomnia	MR Egger	12	-0.0273197	0.0505841	0.600958	-0.126464	0.071825
GCST90027477	GLYCOL.GLYOXDEG.PWY..superpathway.of.glycol.metabolism.and.degradation	insomnia	Weighted median	12	5.06691e-05	0.0141894	0.997151	-0.0277606	0.0278619
GCST90027477	GLYCOL.GLYOXDEG.PWY..superpathway.of.glycol.metabolism.and.degradation	insomnia	Weighted mode	12	0.00104196	0.022935	0.964578	-0.0439106	0.0459945
GCST90027477	GLYCOL.GLYOXDEG.PWY..superpathway.of.glycol.metabolism.and.degradation	insomnia	Maximum likelihood	12	0.000773388	0.0114019	0.945921	-0.0215743	0.0231211
GCST90027478	GOLPDLCAT.PWY..superpathway.of.glycerol.degradation.to.1.3.propanediol	insomnia	Inverse variance weighted	11	-0.0108269	0.0152816	0.478641	-0.0407788	0.0191251
GCST90027478	GOLPDLCAT.PWY..superpathway.of.glycerol.degradation.to.1.3.propanediol	insomnia	MR Egger	11	-0.0474867	0.0800166	0.567486	-0.204319	0.109346
GCST90027478	GOLPDLCAT.PWY..superpathway.of.glycerol.degradation.to.1.3.propanediol	insomnia	Weighted median	11	-0.014102	0.0187703	0.452476	-0.0508918	0.0226878
GCST90027478	GOLPDLCAT.PWY..superpathway.of.glycerol.degradation.to.1.3.propanediol	insomnia	Weighted mode	11	-0.0223909	0.0307981	0.483884	-0.0827551	0.0379733
GCST90027478	GOLPDLCAT.PWY..superpathway.of.glycerol.degradation.to.1.3.propanediol	insomnia	Maximum likelihood	11	-0.0108578	0.0153828	0.480285	-0.041008	0.0192924
GCST90027479	HEMESYN2.PWY..heme.biosynthesis.II..anaerobic.	insomnia	Inverse variance weighted	11	0.00554741	0.020158	0.783165	-0.0339622	0.045057
GCST90027479	HEMESYN2.PWY..heme.biosynthesis.II..anaerobic.	insomnia	MR Egger	11	0.0125106	0.0927337	0.895653	-0.169248	0.194269
GCST90027479	HEMESYN2.PWY..heme.biosynthesis.II..anaerobic.	insomnia	Weighted median	11	0.0028758	0.0251999	0.909143	-0.0465161	0.0522676
GCST90027479	HEMESYN2.PWY..heme.biosynthesis.II..anaerobic.	insomnia	Weighted mode	11	0.00185154	0.038592	0.962679	-0.0737887	0.0774918
GCST90027479	HEMESYN2.PWY..heme.biosynthesis.II..anaerobic.	insomnia	Maximum likelihood	11	0.0056533	0.0202424	0.78003	-0.0340217	0.0453283
GCST90027480	HEXITOLDEGSUPER.PWY..superpathway.of.hexitol.degradation..bacteria.	insomnia	Inverse variance weighted	7	0.00662248	0.0258988	0.798178	-0.0441393	0.0573842
GCST90027480	HEXITOLDEGSUPER.PWY..superpathway.of.hexitol.degradation..bacteria.	insomnia	MR Egger	7	0.00981463	0.0846003	0.912159	-0.156002	0.175631
GCST90027480	HEXITOLDEGSUPER.PWY..superpathway.of.hexitol.degradation..bacteria.	insomnia	Weighted median	7	0.0115439	0.0316197	0.715047	-0.0504307	0.0735186
GCST90027480	HEXITOLDEGSUPER.PWY..superpathway.of.hexitol.degradation..bacteria.	insomnia	Weighted mode	7	0.0144453	0.0446216	0.75713	-0.073013	0.101904
GCST90027480	HEXITOLDEGSUPER.PWY..superpathway.of.hexitol.degradation..bacteria.	insomnia	Maximum likelihood	7	0.0066876	0.0260052	0.797052	-0.0442825	0.0576577
GCST90027481	HISDEG.PWY..L.histidine.degradation.I	insomnia	Inverse variance weighted	7	0.00277129	0.0244838	0.909881	-0.045217	0.0507596
GCST90027481	HISDEG.PWY..L.histidine.degradation.I	insomnia	MR Egger	7	0.0319385	0.101874	0.766551	-0.167735	0.231612
GCST90027481	HISDEG.PWY..L.histidine.degradation.I	insomnia	Weighted median	7	-0.000269605	0.0309582	0.993052	-0.0609477	0.0604085
GCST90027481	HISDEG.PWY..L.histidine.degradation.I	insomnia	Weighted mode	7	0.00575588	0.0437699	0.899676	-0.0800331	0.0915449
GCST90027481	HISDEG.PWY..L.histidine.degradation.I	insomnia	Maximum likelihood	7	0.00282549	0.0247344	0.909053	-0.0456539	0.0513049
GCST90027482	HISTSYN.PWY..L.histidine.biosynthesis	insomnia	Inverse variance weighted	8	0.00974045	0.0236676	0.680668	-0.0366481	0.056129
GCST90027482	HISTSYN.PWY..L.histidine.biosynthesis	insomnia	MR Egger	8	0.0112668	0.0676119	0.873128	-0.121252	0.143786
GCST90027482	HISTSYN.PWY..L.histidine.biosynthesis	insomnia	Weighted median	8	0.0217508	0.0278164	0.434248	-0.0327692	0.0762709
GCST90027482	HISTSYN.PWY..L.histidine.biosynthesis	insomnia	Weighted mode	8	0.0269419	0.0410622	0.53271	-0.05354	0.107424
GCST90027482	HISTSYN.PWY..L.histidine.biosynthesis	insomnia	Maximum likelihood	8	0.00971451	0.0237812	0.68291	-0.0368966	0.0563256
GCST90027483	HOMOSER.METSYN.PWY..L.methionine.biosynthesis.I	insomnia	Inverse variance weighted	5	-0.00950759	0.0296408	0.748392	-0.0676036	0.0485884
GCST90027483	HOMOSER.METSYN.PWY..L.methionine.biosynthesis.I	insomnia	MR Egger	5	-0.240459	0.175225	0.263578	-0.583899	0.102982
GCST90027483	HOMOSER.METSYN.PWY..L.methionine.biosynthesis.I	insomnia	Weighted median	5	-0.00264769	0.0377717	0.944116	-0.0766802	0.0713848
GCST90027483	HOMOSER.METSYN.PWY..L.methionine.biosynthesis.I	insomnia	Weighted mode	5	-0.00121072	0.0489891	0.981467	-0.0972293	0.0948079
GCST90027483	HOMOSER.METSYN.PWY..L.methionine.biosynthesis.I	insomnia	Maximum likelihood	5	-0.00969829	0.029944	0.746029	-0.0683886	0.048992
GCST90027484	HSERMETANA.PWY..L.methionine.biosynthesis.III	insomnia	Inverse variance weighted	12	-0.00501102	0.0192616	0.794743	-0.0427637	0.0327416
GCST90027484	HSERMETANA.PWY..L.methionine.biosynthesis.III	insomnia	MR Egger	12	0.0138523	0.082294	0.869682	-0.147444	0.175148
GCST90027484	HSERMETANA.PWY..L.methionine.biosynthesis.III	insomnia	Weighted median	12	-0.00494287	0.0247131	0.841473	-0.0533806	0.0434949
GCST90027484	HSERMETANA.PWY..L.methionine.biosynthesis.III	insomnia	Weighted mode	12	-0.0059094	0.0378828	0.878866	-0.0801598	0.068341
GCST90027484	HSERMETANA.PWY..L.methionine.biosynthesis.III	insomnia	Maximum likelihood	12	-0.00504235	0.0194042	0.794973	-0.0430747	0.03299
GCST90027485	ILEUSYN.PWY..L.isoleucine.biosynthesis.I..from.threonine.	insomnia	Inverse variance weighted	5	0.0227145	0.0320296	0.478218	-0.0400636	0.0854926
GCST90027485	ILEUSYN.PWY..L.isoleucine.biosynthesis.I..from.threonine.	insomnia	MR Egger	5	-0.0162779	0.148834	0.919815	-0.307993	0.275437
GCST90027485	ILEUSYN.PWY..L.isoleucine.biosynthesis.I..from.threonine.	insomnia	Weighted median	5	0.0139895	0.0390387	0.720083	-0.0625264	0.0905053
GCST90027485	ILEUSYN.PWY..L.isoleucine.biosynthesis.I..from.threonine.	insomnia	Weighted mode	5	0.0122411	0.047258	0.808399	-0.0803846	0.104867
GCST90027485	ILEUSYN.PWY..L.isoleucine.biosynthesis.I..from.threonine.	insomnia	Maximum likelihood	5	0.0227724	0.0321537	0.4788	-0.040249	0.0857937
GCST90027486	KDO.NAGLIPASYN.PWY..superpathway.of..Kdo.2.lipid.A.biosynthesis	insomnia	Inverse variance weighted	5	0.000280951	0.0138784	0.983849	-0.0269206	0.0274825
GCST90027486	KDO.NAGLIPASYN.PWY..superpathway.of..Kdo.2.lipid.A.biosynthesis	insomnia	MR Egger	5	-0.0369921	0.0907581	0.710916	-0.214878	0.140894
GCST90027486	KDO.NAGLIPASYN.PWY..superpathway.of..Kdo.2.lipid.A.biosynthesis	insomnia	Weighted median	5	0.0023714	0.0177466	0.893698	-0.0324119	0.0371548
GCST90027486	KDO.NAGLIPASYN.PWY..superpathway.of..Kdo.2.lipid.A.biosynthesis	insomnia	Weighted mode	5	0.0141862	0.0254197	0.606551	-0.0356364	0.0640087
GCST90027486	KDO.NAGLIPASYN.PWY..superpathway.of..Kdo.2.lipid.A.biosynthesis	insomnia	Maximum likelihood	5	0.00028912	0.0140265	0.983555	-0.0272028	0.027781
GCST90027487	KETOGLUCONMET.PWY..ketogluconate.metabolism	insomnia	Inverse variance weighted	9	0.00730772	0.0129105	0.571375	-0.0179969	0.0326123
GCST90027487	KETOGLUCONMET.PWY..ketogluconate.metabolism	insomnia	MR Egger	9	0.0307634	0.0522212	0.574307	-0.0715902	0.133117
GCST90027487	KETOGLUCONMET.PWY..ketogluconate.metabolism	insomnia	Weighted median	9	0.0091727	0.0165951	0.580444	-0.0233536	0.041699
GCST90027487	KETOGLUCONMET.PWY..ketogluconate.metabolism	insomnia	Weighted mode	9	0.00721729	0.0231385	0.763078	-0.0381341	0.0525687
GCST90027487	KETOGLUCONMET.PWY..ketogluconate.metabolism	insomnia	Maximum likelihood	9	0.00740274	0.0129892	0.568736	-0.0180561	0.0328616
GCST90027488	LACTOSECAT.PWY..lactose.and.galactose.degradation.I	insomnia	Inverse variance weighted	9	-0.0106045	0.0199276	0.594619	-0.0496625	0.0284535
GCST90027488	LACTOSECAT.PWY..lactose.and.galactose.degradation.I	insomnia	MR Egger	9	0.0434405	0.0644879	0.522164	-0.0829557	0.169837
GCST90027488	LACTOSECAT.PWY..lactose.and.galactose.degradation.I	insomnia	Weighted median	9	-0.0186209	0.0252172	0.46026	-0.0680467	0.0308049
GCST90027488	LACTOSECAT.PWY..lactose.and.galactose.degradation.I	insomnia	Weighted mode	9	-0.0343044	0.0342379	0.34571	-0.101411	0.0328019
GCST90027488	LACTOSECAT.PWY..lactose.and.galactose.degradation.I	insomnia	Maximum likelihood	9	-0.0105031	0.0200599	0.600565	-0.0498206	0.0288143
GCST90027489	METHGLYUT.PWY..superpathway.of.methylglyoxal.degradation	insomnia	Inverse variance weighted	7	0.00231954	0.0117598	0.843637	-0.0207296	0.0253687
GCST90027489	METHGLYUT.PWY..superpathway.of.methylglyoxal.degradation	insomnia	MR Egger	7	-0.0147461	0.0416363	0.737661	-0.0963533	0.0668611
GCST90027489	METHGLYUT.PWY..superpathway.of.methylglyoxal.degradation	insomnia	Weighted median	7	-0.00123286	0.0147824	0.933534	-0.0302064	0.0277407
GCST90027489	METHGLYUT.PWY..superpathway.of.methylglyoxal.degradation	insomnia	Weighted mode	7	-0.00345642	0.0201201	0.869251	-0.0428918	0.0359789
GCST90027489	METHGLYUT.PWY..superpathway.of.methylglyoxal.degradation	insomnia	Maximum likelihood	7	0.00231815	0.0117989	0.844242	-0.0208078	0.0254441
GCST90027490	NAGLIPASYN.PWY..lipid.IVA.biosynthesis	insomnia	Inverse variance weighted	9	0.000351525	0.0221296	0.987326	-0.0430224	0.0437255
GCST90027490	NAGLIPASYN.PWY..lipid.IVA.biosynthesis	insomnia	MR Egger	9	0.0173278	0.101124	0.868795	-0.180875	0.215531
GCST90027490	NAGLIPASYN.PWY..lipid.IVA.biosynthesis	insomnia	Weighted median	9	-0.00216307	0.0274262	0.937137	-0.0559184	0.0515922
GCST90027490	NAGLIPASYN.PWY..lipid.IVA.biosynthesis	insomnia	Weighted mode	9	0.00465144	0.0399911	0.910272	-0.0737311	0.083034
GCST90027490	NAGLIPASYN.PWY..lipid.IVA.biosynthesis	insomnia	Maximum likelihood	9	0.000355518	0.0222687	0.987262	-0.0432912	0.0440022
GCST90027491	NONMEVIPP.PWY..methylerythritol.phosphate.pathway.I	insomnia	Inverse variance weighted	9	-0.00168802	0.0217918	0.938257	-0.0444	0.041024
GCST90027491	NONMEVIPP.PWY..methylerythritol.phosphate.pathway.I	insomnia	MR Egger	9	0.043239	0.086136	0.63108	-0.125588	0.212066
GCST90027491	NONMEVIPP.PWY..methylerythritol.phosphate.pathway.I	insomnia	Weighted median	9	0.0070693	0.0272478	0.795292	-0.0463364	0.060475
GCST90027491	NONMEVIPP.PWY..methylerythritol.phosphate.pathway.I	insomnia	Weighted mode	9	0.0200561	0.0445944	0.66483	-0.0673489	0.107461
GCST90027491	NONMEVIPP.PWY..methylerythritol.phosphate.pathway.I	insomnia	Maximum likelihood	9	-0.00169472	0.0218634	0.938214	-0.044547	0.0411576
GCST90027492	NONOXIPENT.PWY..pentose.phosphate.pathway..non.oxidative.branch.	insomnia	Inverse variance weighted	6	0.0171087	0.0255091	0.502418	-0.0328892	0.0671065
GCST90027492	NONOXIPENT.PWY..pentose.phosphate.pathway..non.oxidative.branch.	insomnia	MR Egger	6	-0.0624894	0.119415	0.62842	-0.296544	0.171565
GCST90027492	NONOXIPENT.PWY..pentose.phosphate.pathway..non.oxidative.branch.	insomnia	Weighted median	6	0.00830595	0.0318248	0.794101	-0.0540707	0.0706826
GCST90027492	NONOXIPENT.PWY..pentose.phosphate.pathway..non.oxidative.branch.	insomnia	Weighted mode	6	-0.00185299	0.0425676	0.966964	-0.0852855	0.0815795
GCST90027492	NONOXIPENT.PWY..pentose.phosphate.pathway..non.oxidative.branch.	insomnia	Maximum likelihood	6	0.0173459	0.0257841	0.501115	-0.0331909	0.0678827
GCST90027493	ORNDEG.PWY..superpathway.of.ornithine.degradation	insomnia	Inverse variance weighted	5	0.00865263	0.0107931	0.422736	-0.0125018	0.0298071
GCST90027493	ORNDEG.PWY..superpathway.of.ornithine.degradation	insomnia	MR Egger	5	0.0209198	0.0410681	0.645582	-0.0595736	0.101413
GCST90027493	ORNDEG.PWY..superpathway.of.ornithine.degradation	insomnia	Weighted median	5	0.00664055	0.0133008	0.617596	-0.019429	0.0327101
GCST90027493	ORNDEG.PWY..superpathway.of.ornithine.degradation	insomnia	Weighted mode	5	0.00462768	0.016903	0.797811	-0.0285022	0.0377576
GCST90027493	ORNDEG.PWY..superpathway.of.ornithine.degradation	insomnia	Maximum likelihood	5	0.00867101	0.0108374	0.423653	-0.0125703	0.0299123
GCST90027494	P105.PWY..TCA.cycle.IV..2.oxoglutarate.decarboxylase.	insomnia	Inverse variance weighted	5	0.022555	0.0191237	0.23823	-0.0149276	0.0600375
GCST90027494	P105.PWY..TCA.cycle.IV..2.oxoglutarate.decarboxylase.	insomnia	MR Egger	5	0.0551191	0.0917198	0.590244	-0.124652	0.23489
GCST90027494	P105.PWY..TCA.cycle.IV..2.oxoglutarate.decarboxylase.	insomnia	Weighted median	5	0.0215264	0.0225804	0.340426	-0.0227311	0.0657839
GCST90027494	P105.PWY..TCA.cycle.IV..2.oxoglutarate.decarboxylase.	insomnia	Weighted mode	5	0.0158585	0.0291522	0.615351	-0.0412799	0.0729969
GCST90027494	P105.PWY..TCA.cycle.IV..2.oxoglutarate.decarboxylase.	insomnia	Maximum likelihood	5	0.0226553	0.0192907	0.240228	-0.0151544	0.060465
GCST90027495	P108.PWY..pyruvate.fermentation.to.propanoate.I	insomnia	Inverse variance weighted	11	-0.00454251	0.0189702	0.810753	-0.0417241	0.0326391
GCST90027495	P108.PWY..pyruvate.fermentation.to.propanoate.I	insomnia	MR Egger	11	-0.00933912	0.0810473	0.910792	-0.168192	0.149514
GCST90027495	P108.PWY..pyruvate.fermentation.to.propanoate.I	insomnia	Weighted median	11	-0.00507314	0.0239966	0.832567	-0.0521065	0.0419602
GCST90027495	P108.PWY..pyruvate.fermentation.to.propanoate.I	insomnia	Weighted mode	11	-0.0173491	0.0371997	0.650941	-0.0902606	0.0555625
GCST90027495	P108.PWY..pyruvate.fermentation.to.propanoate.I	insomnia	Maximum likelihood	11	-0.00450867	0.0190211	0.812629	-0.0417899	0.0327726
GCST90027496	P122.PWY..heterolactic.fermentation	insomnia	Inverse variance weighted	4	0.00379136	0.0177802	0.831143	-0.0310578	0.0386405
GCST90027496	P122.PWY..heterolactic.fermentation	insomnia	MR Egger	4	0.0195193	0.0734019	0.815202	-0.124348	0.163387
GCST90027496	P122.PWY..heterolactic.fermentation	insomnia	Weighted median	4	0.000470227	0.0209411	0.982085	-0.0405743	0.0415147
GCST90027496	P122.PWY..heterolactic.fermentation	insomnia	Weighted mode	4	-0.00282511	0.0254547	0.918636	-0.0527163	0.047066
GCST90027496	P122.PWY..heterolactic.fermentation	insomnia	Maximum likelihood	4	0.00380373	0.0178072	0.830854	-0.0310983	0.0387058
GCST90027497	P161.PWY..acetylene.degradation	insomnia	Inverse variance weighted	3	-0.00966204	0.0398988	0.808653	-0.0878636	0.0685396
GCST90027497	P161.PWY..acetylene.degradation	insomnia	MR Egger	3	-0.0265168	0.299922	0.943861	-0.614365	0.561331
GCST90027497	P161.PWY..acetylene.degradation	insomnia	Weighted median	3	-0.00705932	0.045195	0.875878	-0.0956415	0.0815228
GCST90027497	P161.PWY..acetylene.degradation	insomnia	Weighted mode	3	-0.00370404	0.0570052	0.954103	-0.115434	0.108026
GCST90027497	P161.PWY..acetylene.degradation	insomnia	Maximum likelihood	3	-0.00968419	0.0399652	0.808536	-0.0880159	0.0686475
GCST90027498	P162.PWY..L.glutamate.degradation.V..via.hydroxyglutarate.	insomnia	Inverse variance weighted	9	-0.00648477	0.0219154	0.767306	-0.0494389	0.0364693
GCST90027498	P162.PWY..L.glutamate.degradation.V..via.hydroxyglutarate.	insomnia	MR Egger	9	-0.0720852	0.0891361	0.445294	-0.246792	0.102622
GCST90027498	P162.PWY..L.glutamate.degradation.V..via.hydroxyglutarate.	insomnia	Weighted median	9	-0.00673089	0.027337	0.805513	-0.0603114	0.0468496
GCST90027498	P162.PWY..L.glutamate.degradation.V..via.hydroxyglutarate.	insomnia	Weighted mode	9	-0.00323905	0.038079	0.934303	-0.077874	0.0713959
GCST90027498	P162.PWY..L.glutamate.degradation.V..via.hydroxyglutarate.	insomnia	Maximum likelihood	9	-0.00654738	0.0220259	0.766269	-0.0497181	0.0366233
GCST90027499	P164.PWY..purine.nucleobases.degradation.I..anaerobic.	insomnia	Inverse variance weighted	10	0.00436425	0.0146277	0.765432	-0.0243061	0.0330346
GCST90027499	P164.PWY..purine.nucleobases.degradation.I..anaerobic.	insomnia	MR Egger	10	-0.0140988	0.0617693	0.825179	-0.135167	0.106969
GCST90027499	P164.PWY..purine.nucleobases.degradation.I..anaerobic.	insomnia	Weighted median	10	-5.37197e-05	0.0182425	0.99765	-0.035809	0.0357016
GCST90027499	P164.PWY..purine.nucleobases.degradation.I..anaerobic.	insomnia	Weighted mode	10	-0.00102046	0.0265748	0.970207	-0.0531071	0.0510662
GCST90027499	P164.PWY..purine.nucleobases.degradation.I..anaerobic.	insomnia	Maximum likelihood	10	0.00440734	0.0147129	0.764515	-0.0244298	0.0332445
GCST90027500	P23.PWY..reductive.TCA.cycle.I	insomnia	Inverse variance weighted	9	-0.0112977	0.0102066	0.268339	-0.0313027	0.00870732
GCST90027500	P23.PWY..reductive.TCA.cycle.I	insomnia	MR Egger	9	0.0421512	0.0644045	0.53371	-0.0840816	0.168384
GCST90027500	P23.PWY..reductive.TCA.cycle.I	insomnia	Weighted median	9	-0.00997246	0.0127282	0.433336	-0.0349196	0.0149747
GCST90027500	P23.PWY..reductive.TCA.cycle.I	insomnia	Weighted mode	9	-0.0136536	0.0198425	0.510844	-0.0525449	0.0252376
GCST90027500	P23.PWY..reductive.TCA.cycle.I	insomnia	Maximum likelihood	9	-0.0114674	0.0103125	0.266141	-0.0316799	0.00874506
GCST90027501	P42.PWY..incomplete.reductive.TCA.cycle	insomnia	Inverse variance weighted	11	-0.00134755	0.0203649	0.947242	-0.0412627	0.0385676
GCST90027501	P42.PWY..incomplete.reductive.TCA.cycle	insomnia	MR Egger	11	0.0930825	0.097953	0.36679	-0.0989053	0.28507
GCST90027501	P42.PWY..incomplete.reductive.TCA.cycle	insomnia	Weighted median	11	-0.00475732	0.0255576	0.852334	-0.0548503	0.0453357
GCST90027501	P42.PWY..incomplete.reductive.TCA.cycle	insomnia	Weighted mode	11	-0.0136841	0.0373554	0.721756	-0.0869007	0.0595325
GCST90027501	P42.PWY..incomplete.reductive.TCA.cycle	insomnia	Maximum likelihood	11	-0.00134538	0.0204544	0.947558	-0.0414361	0.0387453
GCST90027502	P441.PWY..superpathway.of.N.acetylneuraminate.degradation	insomnia	Inverse variance weighted	10	0.00323088	0.0211525	0.878602	-0.038228	0.0446898
GCST90027502	P441.PWY..superpathway.of.N.acetylneuraminate.degradation	insomnia	MR Egger	10	0.0166883	0.0740906	0.827439	-0.128529	0.161906
GCST90027502	P441.PWY..superpathway.of.N.acetylneuraminate.degradation	insomnia	Weighted median	10	0.00508913	0.025802	0.843642	-0.0454829	0.0556611
GCST90027502	P441.PWY..superpathway.of.N.acetylneuraminate.degradation	insomnia	Weighted mode	10	0.00637287	0.0383762	0.871778	-0.0688445	0.0815902
GCST90027502	P441.PWY..superpathway.of.N.acetylneuraminate.degradation	insomnia	Maximum likelihood	10	0.00330112	0.0212428	0.876506	-0.0383348	0.044937
GCST90027503	P461.PWY..hexitol.fermentation.to.lactate..formate..ethanol.and.acetate	insomnia	Inverse variance weighted	9	0.0252229	0.0224024	0.260208	-0.0186859	0.0691316
GCST90027503	P461.PWY..hexitol.fermentation.to.lactate..formate..ethanol.and.acetate	insomnia	MR Egger	9	-0.000505363	0.0755798	0.994852	-0.148642	0.147631
GCST90027503	P461.PWY..hexitol.fermentation.to.lactate..formate..ethanol.and.acetate	insomnia	Weighted median	9	0.0272226	0.0281883	0.334173	-0.0280264	0.0824717
GCST90027503	P461.PWY..hexitol.fermentation.to.lactate..formate..ethanol.and.acetate	insomnia	Weighted mode	9	0.0248354	0.0419071	0.569796	-0.0573025	0.106973
GCST90027503	P461.PWY..hexitol.fermentation.to.lactate..formate..ethanol.and.acetate	insomnia	Maximum likelihood	9	0.0256712	0.0226763	0.257603	-0.0187743	0.0701167
GCST90027504	PANTO.PWY..phosphopantothenate.biosynthesis.I	insomnia	Inverse variance weighted	8	-0.00514886	0.0227203	0.82072	-0.0496807	0.039383
GCST90027504	PANTO.PWY..phosphopantothenate.biosynthesis.I	insomnia	MR Egger	8	-0.0695741	0.108006	0.54329	-0.281266	0.142117
GCST90027504	PANTO.PWY..phosphopantothenate.biosynthesis.I	insomnia	Weighted median	8	-0.0111209	0.0275054	0.68598	-0.0650314	0.0427897
GCST90027504	PANTO.PWY..phosphopantothenate.biosynthesis.I	insomnia	Weighted mode	8	-0.0235331	0.0411684	0.58545	-0.104223	0.0571569
GCST90027504	PANTO.PWY..phosphopantothenate.biosynthesis.I	insomnia	Maximum likelihood	8	-0.00518418	0.0228479	0.820501	-0.049966	0.0395976
GCST90027505	PANTOSYN.PWY..pantothenate.and.coenzyme.A.biosynthesis.I	insomnia	Inverse variance weighted	7	-0.00252918	0.0264554	0.923837	-0.0543817	0.0493234
GCST90027505	PANTOSYN.PWY..pantothenate.and.coenzyme.A.biosynthesis.I	insomnia	MR Egger	7	-0.0540014	0.102839	0.621954	-0.255567	0.147564
GCST90027505	PANTOSYN.PWY..pantothenate.and.coenzyme.A.biosynthesis.I	insomnia	Weighted median	7	0.00954538	0.0336347	0.776567	-0.0563785	0.0754693
GCST90027505	PANTOSYN.PWY..pantothenate.and.coenzyme.A.biosynthesis.I	insomnia	Weighted mode	7	0.0194889	0.0461758	0.687687	-0.0710156	0.109993
GCST90027505	PANTOSYN.PWY..pantothenate.and.coenzyme.A.biosynthesis.I	insomnia	Maximum likelihood	7	-0.00256492	0.0266161	0.923229	-0.0547326	0.0496027
GCST90027506	PENTOSE.P.PWY..pentose.phosphate.pathway	insomnia	Inverse variance weighted	11	0.00629735	0.0206095	0.759942	-0.0340972	0.0466919
GCST90027506	PENTOSE.P.PWY..pentose.phosphate.pathway	insomnia	MR Egger	11	-0.0176751	0.0864906	0.84262	-0.187197	0.151846
GCST90027506	PENTOSE.P.PWY..pentose.phosphate.pathway	insomnia	Weighted median	11	0.0139284	0.0267516	0.602608	-0.0385049	0.0663616
GCST90027506	PENTOSE.P.PWY..pentose.phosphate.pathway	insomnia	Weighted mode	11	0.0265738	0.0378004	0.498094	-0.047515	0.100663
GCST90027506	PENTOSE.P.PWY..pentose.phosphate.pathway	insomnia	Maximum likelihood	11	0.00634483	0.0206983	0.759194	-0.0342238	0.0469135
GCST90027507	PEPTIDOGLYCANSYN.PWY..peptidoglycan.biosynthesis.I..meso.diaminopimelate.containing.	insomnia	Inverse variance weighted	7	0.00668296	0.0245188	0.785187	-0.0413738	0.0547397
GCST90027507	PEPTIDOGLYCANSYN.PWY..peptidoglycan.biosynthesis.I..meso.diaminopimelate.containing.	insomnia	MR Egger	7	0.0432768	0.0995289	0.681823	-0.1518	0.238353
GCST90027507	PEPTIDOGLYCANSYN.PWY..peptidoglycan.biosynthesis.I..meso.diaminopimelate.containing.	insomnia	Weighted median	7	0.0208879	0.0312821	0.504309	-0.0404251	0.0822009
GCST90027507	PEPTIDOGLYCANSYN.PWY..peptidoglycan.biosynthesis.I..meso.diaminopimelate.containing.	insomnia	Weighted mode	7	0.0334329	0.045011	0.485672	-0.0547885	0.121654
GCST90027507	PEPTIDOGLYCANSYN.PWY..peptidoglycan.biosynthesis.I..meso.diaminopimelate.containing.	insomnia	Maximum likelihood	7	0.00680932	0.0246939	0.78274	-0.0415907	0.0552093
GCST90027508	PHOSLIPSYN.PWY..superpathway.of.phospholipid.biosynthesis.I..bacteria.	insomnia	Inverse variance weighted	8	0.0148536	0.0244113	0.542875	-0.0329926	0.0626998
GCST90027508	PHOSLIPSYN.PWY..superpathway.of.phospholipid.biosynthesis.I..bacteria.	insomnia	MR Egger	8	-0.0771687	0.0959816	0.45207	-0.265293	0.110955
GCST90027508	PHOSLIPSYN.PWY..superpathway.of.phospholipid.biosynthesis.I..bacteria.	insomnia	Weighted median	8	0.0177056	0.0299626	0.554572	-0.0410211	0.0764323
GCST90027508	PHOSLIPSYN.PWY..superpathway.of.phospholipid.biosynthesis.I..bacteria.	insomnia	Weighted mode	8	0.0184948	0.0442615	0.688574	-0.0682578	0.105247
GCST90027508	PHOSLIPSYN.PWY..superpathway.of.phospholipid.biosynthesis.I..bacteria.	insomnia	Maximum likelihood	8	0.0149254	0.0245294	0.542877	-0.0331523	0.063003
GCST90027509	POLYAMINSYN3.PWY..superpathway.of.polyamine.biosynthesis.II	insomnia	Inverse variance weighted	7	-0.00665272	0.0199209	0.738413	-0.0456978	0.0323923
GCST90027509	POLYAMINSYN3.PWY..superpathway.of.polyamine.biosynthesis.II	insomnia	MR Egger	7	0.00715709	0.0723306	0.925023	-0.134611	0.148925
GCST90027509	POLYAMINSYN3.PWY..superpathway.of.polyamine.biosynthesis.II	insomnia	Weighted median	7	-0.00686005	0.0253056	0.786323	-0.056459	0.0427389
GCST90027509	POLYAMINSYN3.PWY..superpathway.of.polyamine.biosynthesis.II	insomnia	Weighted mode	7	-0.0292152	0.0372437	0.462623	-0.102213	0.0437824
GCST90027509	POLYAMINSYN3.PWY..superpathway.of.polyamine.biosynthesis.II	insomnia	Maximum likelihood	7	-0.00679838	0.0201541	0.735876	-0.0463004	0.0327036
GCST90027510	POLYAMSYN.PWY..superpathway.of.polyamine.biosynthesis.I	insomnia	Inverse variance weighted	8	-0.0289459	0.0241069	0.229855	-0.0761953	0.0183036
GCST90027510	POLYAMSYN.PWY..superpathway.of.polyamine.biosynthesis.I	insomnia	MR Egger	8	-0.0889179	0.0976372	0.397565	-0.280287	0.102451
GCST90027510	POLYAMSYN.PWY..superpathway.of.polyamine.biosynthesis.I	insomnia	Weighted median	8	-0.0331298	0.0298671	0.267326	-0.0916693	0.0254097
GCST90027510	POLYAMSYN.PWY..superpathway.of.polyamine.biosynthesis.I	insomnia	Weighted mode	8	-0.0295668	0.0443905	0.526705	-0.116572	0.0574385
GCST90027510	POLYAMSYN.PWY..superpathway.of.polyamine.biosynthesis.I	insomnia	Maximum likelihood	8	-0.0293321	0.0243563	0.228477	-0.0770705	0.0184063
GCST90027511	POLYISOPRENSYN.PWY..polyisoprenoid.biosynthesis..E..coli.	insomnia	Inverse variance weighted	6	-0.00996697	0.0161246	0.536494	-0.0415711	0.0216372
GCST90027511	POLYISOPRENSYN.PWY..polyisoprenoid.biosynthesis..E..coli.	insomnia	MR Egger	6	-0.0311739	0.0850347	0.732485	-0.197842	0.135494
GCST90027511	POLYISOPRENSYN.PWY..polyisoprenoid.biosynthesis..E..coli.	insomnia	Weighted median	6	-0.0119339	0.0187511	0.524491	-0.0486861	0.0248182
GCST90027511	POLYISOPRENSYN.PWY..polyisoprenoid.biosynthesis..E..coli.	insomnia	Weighted mode	6	-0.0128363	0.0266832	0.650785	-0.0651354	0.0394627
GCST90027511	POLYISOPRENSYN.PWY..polyisoprenoid.biosynthesis..E..coli.	insomnia	Maximum likelihood	6	-0.0100397	0.0162115	0.535724	-0.0418143	0.0217349
GCST90027512	PPGPPMET.PWY..ppGpp.biosynthesis	insomnia	Inverse variance weighted	8	0.0148212	0.0210074	0.480485	-0.0263533	0.0559957
GCST90027512	PPGPPMET.PWY..ppGpp.biosynthesis	insomnia	MR Egger	8	-0.0708682	0.076151	0.387958	-0.220124	0.0783877
GCST90027512	PPGPPMET.PWY..ppGpp.biosynthesis	insomnia	Weighted median	8	0.0170643	0.0246515	0.488798	-0.0312527	0.0653813
GCST90027512	PPGPPMET.PWY..ppGpp.biosynthesis	insomnia	Weighted mode	8	0.0165448	0.03818	0.67781	-0.058288	0.0913775
GCST90027512	PPGPPMET.PWY..ppGpp.biosynthesis	insomnia	Maximum likelihood	8	0.0150168	0.021165	0.478006	-0.0264666	0.0565002
GCST90027513	PRPP.PWY..superpathway.of.histidine..purine..and.pyrimidine.biosynthesis	insomnia	Inverse variance weighted	12	-0.00244084	0.0193711	0.899729	-0.0404083	0.0355266
GCST90027513	PRPP.PWY..superpathway.of.histidine..purine..and.pyrimidine.biosynthesis	insomnia	MR Egger	12	-0.120729	0.0833074	0.177908	-0.284011	0.0425541
GCST90027513	PRPP.PWY..superpathway.of.histidine..purine..and.pyrimidine.biosynthesis	insomnia	Weighted median	12	-0.0131644	0.0244917	0.590919	-0.0611681	0.0348393
GCST90027513	PRPP.PWY..superpathway.of.histidine..purine..and.pyrimidine.biosynthesis	insomnia	Weighted mode	12	-0.0169923	0.040397	0.682123	-0.0961704	0.0621857
GCST90027513	PRPP.PWY..superpathway.of.histidine..purine..and.pyrimidine.biosynthesis	insomnia	Maximum likelihood	12	-0.00247891	0.0196135	0.899425	-0.0409213	0.0359635
GCST90027514	PWY0.1061..superpathway.of.L.alanine.biosynthesis	insomnia	Inverse variance weighted	7	-0.0124635	0.0210909	0.55456	-0.0538017	0.0288747
GCST90027514	PWY0.1061..superpathway.of.L.alanine.biosynthesis	insomnia	MR Egger	7	-0.0506844	0.141856	0.735457	-0.328722	0.227353
GCST90027514	PWY0.1061..superpathway.of.L.alanine.biosynthesis	insomnia	Weighted median	7	-0.00313885	0.0252389	0.901026	-0.0526071	0.0463294
GCST90027514	PWY0.1061..superpathway.of.L.alanine.biosynthesis	insomnia	Weighted mode	7	-0.00365175	0.0363676	0.923288	-0.0749322	0.0676287
GCST90027514	PWY0.1061..superpathway.of.L.alanine.biosynthesis	insomnia	Maximum likelihood	7	-0.0125745	0.0211971	0.553036	-0.0541209	0.0289719
GCST90027515	PWY0.1241..ADP.L.glycero..beta..D.manno.heptose.biosynthesis	insomnia	Inverse variance weighted	7	0.00122445	0.0188426	0.948188	-0.035707	0.0381559
GCST90027515	PWY0.1241..ADP.L.glycero..beta..D.manno.heptose.biosynthesis	insomnia	MR Egger	7	0.0716825	0.0946974	0.483195	-0.113924	0.257289
GCST90027515	PWY0.1241..ADP.L.glycero..beta..D.manno.heptose.biosynthesis	insomnia	Weighted median	7	0.0015047	0.0237901	0.949568	-0.045124	0.0481334
GCST90027515	PWY0.1241..ADP.L.glycero..beta..D.manno.heptose.biosynthesis	insomnia	Weighted mode	7	0.00523444	0.0344448	0.884195	-0.0622773	0.0727462
GCST90027515	PWY0.1241..ADP.L.glycero..beta..D.manno.heptose.biosynthesis	insomnia	Maximum likelihood	7	0.00124699	0.0190087	0.947696	-0.0360101	0.0385041
GCST90027516	PWY0.1261..anhydromuropeptides.recycling	insomnia	Inverse variance weighted	7	-0.00366334	0.0250627	0.88379	-0.0527862	0.0454596
GCST90027516	PWY0.1261..anhydromuropeptides.recycling	insomnia	MR Egger	7	0.0690979	0.173441	0.706783	-0.270847	0.409043
GCST90027516	PWY0.1261..anhydromuropeptides.recycling	insomnia	Weighted median	7	0.000358317	0.0310355	0.990788	-0.0604713	0.0611879
GCST90027516	PWY0.1261..anhydromuropeptides.recycling	insomnia	Weighted mode	7	0.00649909	0.040949	0.879103	-0.073761	0.0867592
GCST90027516	PWY0.1261..anhydromuropeptides.recycling	insomnia	Maximum likelihood	7	-0.00369845	0.02513	0.882996	-0.0529532	0.0455563
GCST90027517	PWY0.1296..purine.ribonucleosides.degradation	insomnia	Inverse variance weighted	7	-0.0104468	0.0250478	0.676623	-0.0595404	0.0386468
GCST90027517	PWY0.1296..purine.ribonucleosides.degradation	insomnia	MR Egger	7	0.00287265	0.101269	0.978467	-0.195614	0.20136
GCST90027517	PWY0.1296..purine.ribonucleosides.degradation	insomnia	Weighted median	7	-0.0100089	0.0304522	0.742401	-0.0696951	0.0496774
GCST90027517	PWY0.1296..purine.ribonucleosides.degradation	insomnia	Weighted mode	7	-0.00889435	0.0395081	0.829352	-0.0863303	0.0685416
GCST90027517	PWY0.1296..purine.ribonucleosides.degradation	insomnia	Maximum likelihood	7	-0.0105792	0.0252113	0.674763	-0.0599934	0.038835
GCST90027518	PWY0.1297..superpathway.of.purine.deoxyribonucleosides.degradation	insomnia	Inverse variance weighted	8	-0.0164036	0.0229405	0.474577	-0.061367	0.0285597
GCST90027518	PWY0.1297..superpathway.of.purine.deoxyribonucleosides.degradation	insomnia	MR Egger	8	-0.0501507	0.0960871	0.620419	-0.238481	0.13818
GCST90027518	PWY0.1297..superpathway.of.purine.deoxyribonucleosides.degradation	insomnia	Weighted median	8	-0.026934	0.0273076	0.323977	-0.0804568	0.0265888
GCST90027518	PWY0.1297..superpathway.of.purine.deoxyribonucleosides.degradation	insomnia	Weighted mode	8	-0.0305532	0.0400423	0.470377	-0.109036	0.0479297
GCST90027518	PWY0.1297..superpathway.of.purine.deoxyribonucleosides.degradation	insomnia	Maximum likelihood	8	-0.0164726	0.0230247	0.474341	-0.0616009	0.0286557
GCST90027519	PWY0.1298..superpathway.of.pyrimidine.deoxyribonucleosides.degradation	insomnia	Inverse variance weighted	13	0.00761056	0.0188232	0.685979	-0.0292829	0.0445041
GCST90027519	PWY0.1298..superpathway.of.pyrimidine.deoxyribonucleosides.degradation	insomnia	MR Egger	13	0.0205102	0.0672771	0.766162	-0.111353	0.152373
GCST90027519	PWY0.1298..superpathway.of.pyrimidine.deoxyribonucleosides.degradation	insomnia	Weighted median	13	0.0134287	0.0241268	0.577809	-0.0338599	0.0607173
GCST90027519	PWY0.1298..superpathway.of.pyrimidine.deoxyribonucleosides.degradation	insomnia	Weighted mode	13	0.01766	0.0402558	0.668677	-0.0612414	0.0965614
GCST90027519	PWY0.1298..superpathway.of.pyrimidine.deoxyribonucleosides.degradation	insomnia	Maximum likelihood	13	0.00773503	0.0189695	0.683449	-0.0294451	0.0449152
GCST90027520	PWY0.1338..polymyxin.resistance	insomnia	Inverse variance weighted	5	-0.0123483	0.0158263	0.43525	-0.043368	0.0186713
GCST90027520	PWY0.1338..polymyxin.resistance	insomnia	MR Egger	5	-0.0502123	0.0801827	0.575578	-0.20737	0.106946
GCST90027520	PWY0.1338..polymyxin.resistance	insomnia	Weighted median	5	-0.0189014	0.0195725	0.334189	-0.0572634	0.0194607
GCST90027520	PWY0.1338..polymyxin.resistance	insomnia	Weighted mode	5	-0.022964	0.0233692	0.38141	-0.0687676	0.0228396
GCST90027520	PWY0.1338..polymyxin.resistance	insomnia	Maximum likelihood	5	-0.0124371	0.0159391	0.43522	-0.0436777	0.0188035
GCST90027521	PWY0.1415..superpathway.of.heme.biosynthesis.from.uroporphyrinogen.III	insomnia	Inverse variance weighted	7	0.000208002	0.0147353	0.988738	-0.0286732	0.0290892
GCST90027521	PWY0.1415..superpathway.of.heme.biosynthesis.from.uroporphyrinogen.III	insomnia	MR Egger	7	0.0122465	0.0685107	0.865149	-0.122034	0.146527
GCST90027521	PWY0.1415..superpathway.of.heme.biosynthesis.from.uroporphyrinogen.III	insomnia	Weighted median	7	0.00181919	0.0181918	0.920344	-0.0338367	0.0374751
GCST90027521	PWY0.1415..superpathway.of.heme.biosynthesis.from.uroporphyrinogen.III	insomnia	Weighted mode	7	0.00192111	0.0236582	0.937922	-0.044449	0.0482912
GCST90027521	PWY0.1415..superpathway.of.heme.biosynthesis.from.uroporphyrinogen.III	insomnia	Maximum likelihood	7	0.000207995	0.0147456	0.988746	-0.0286933	0.0291093
GCST90027522	PWY0.1479..tRNA.processing	insomnia	Inverse variance weighted	8	-0.00399775	0.0222971	0.857706	-0.0477	0.0397045
GCST90027522	PWY0.1479..tRNA.processing	insomnia	MR Egger	8	0.0338891	0.0755386	0.669443	-0.114166	0.181945
GCST90027522	PWY0.1479..tRNA.processing	insomnia	Weighted median	8	0.00462928	0.0268806	0.863267	-0.0480567	0.0573153
GCST90027522	PWY0.1479..tRNA.processing	insomnia	Weighted mode	8	0.00569984	0.0382747	0.885817	-0.0693185	0.0807182
GCST90027522	PWY0.1479..tRNA.processing	insomnia	Maximum likelihood	8	-0.00401601	0.022346	0.857373	-0.0478141	0.0397821
GCST90027523	PWY0.1533..methylphosphonate.degradation.I	insomnia	Inverse variance weighted	5	0.000283397	0.0179304	0.98739	-0.0348602	0.035427
GCST90027523	PWY0.1533..methylphosphonate.degradation.I	insomnia	MR Egger	5	-0.0129254	0.0695188	0.864364	-0.149182	0.123331
GCST90027523	PWY0.1533..methylphosphonate.degradation.I	insomnia	Weighted median	5	0.00231547	0.0211714	0.912911	-0.0391805	0.0438114
GCST90027523	PWY0.1533..methylphosphonate.degradation.I	insomnia	Weighted mode	5	0.0046161	0.0285185	0.879261	-0.0512802	0.0605124
GCST90027523	PWY0.1533..methylphosphonate.degradation.I	insomnia	Maximum likelihood	5	0.000285045	0.0179744	0.987347	-0.0349448	0.0355149
GCST90027524	PWY0.1586..peptidoglycan.maturation..meso.diaminopimelate.containing.	insomnia	Inverse variance weighted	7	-0.00842153	0.0253979	0.740203	-0.0582013	0.0413583
GCST90027524	PWY0.1586..peptidoglycan.maturation..meso.diaminopimelate.containing.	insomnia	MR Egger	7	0.0582962	0.0823726	0.510738	-0.103154	0.219746
GCST90027524	PWY0.1586..peptidoglycan.maturation..meso.diaminopimelate.containing.	insomnia	Weighted median	7	-0.00710983	0.0309836	0.818503	-0.0678376	0.053618
GCST90027524	PWY0.1586..peptidoglycan.maturation..meso.diaminopimelate.containing.	insomnia	Weighted mode	7	-0.00753574	0.0437329	0.868857	-0.0932522	0.0781807
GCST90027524	PWY0.1586..peptidoglycan.maturation..meso.diaminopimelate.containing.	insomnia	Maximum likelihood	7	-0.00852454	0.0255683	0.738831	-0.0586385	0.0415894
GCST90027525	PWY0.162..superpathway.of.pyrimidine.ribonucleotides.de.novo.biosynthesis	insomnia	Inverse variance weighted	11	-0.00155701	0.0197151	0.937052	-0.0401986	0.0370846
GCST90027525	PWY0.162..superpathway.of.pyrimidine.ribonucleotides.de.novo.biosynthesis	insomnia	MR Egger	11	-0.00639878	0.0717713	0.930911	-0.147071	0.134273
GCST90027525	PWY0.162..superpathway.of.pyrimidine.ribonucleotides.de.novo.biosynthesis	insomnia	Weighted median	11	-0.00958094	0.023799	0.687259	-0.056227	0.0370651
GCST90027525	PWY0.162..superpathway.of.pyrimidine.ribonucleotides.de.novo.biosynthesis	insomnia	Weighted mode	11	-0.0197701	0.0401258	0.632861	-0.0984165	0.0588764
GCST90027525	PWY0.162..superpathway.of.pyrimidine.ribonucleotides.de.novo.biosynthesis	insomnia	Maximum likelihood	11	-0.00155926	0.0198027	0.93724	-0.0403726	0.0372541
GCST90027526	PWY0.781..aspartate.superpathway	insomnia	Inverse variance weighted	8	0.00877475	0.0233945	0.707603	-0.0370785	0.054628
GCST90027526	PWY0.781..aspartate.superpathway	insomnia	MR Egger	8	-0.0219321	0.0821103	0.798331	-0.182868	0.139004
GCST90027526	PWY0.781..aspartate.superpathway	insomnia	Weighted median	8	0.00716904	0.0276373	0.795329	-0.0470001	0.0613382
GCST90027526	PWY0.781..aspartate.superpathway	insomnia	Weighted mode	8	0.00484197	0.0417649	0.910961	-0.0770173	0.0867012
GCST90027526	PWY0.781..aspartate.superpathway	insomnia	Maximum likelihood	8	0.00890377	0.0235698	0.705607	-0.037293	0.0551005
GCST90027527	PWY0.845..superpathway.of.pyridoxal.5..phosphate.biosynthesis.and.salvage	insomnia	Inverse variance weighted	13	0.00570709	0.0183861	0.756255	-0.0303296	0.0417438
GCST90027527	PWY0.845..superpathway.of.pyridoxal.5..phosphate.biosynthesis.and.salvage	insomnia	MR Egger	13	0.0292788	0.0864537	0.741239	-0.14017	0.198728
GCST90027527	PWY0.845..superpathway.of.pyridoxal.5..phosphate.biosynthesis.and.salvage	insomnia	Weighted median	13	0.0106311	0.0240186	0.658041	-0.0364453	0.0577075
GCST90027527	PWY0.845..superpathway.of.pyridoxal.5..phosphate.biosynthesis.and.salvage	insomnia	Weighted mode	13	-0.0138752	0.0363901	0.709653	-0.0851998	0.0574494
GCST90027527	PWY0.845..superpathway.of.pyridoxal.5..phosphate.biosynthesis.and.salvage	insomnia	Maximum likelihood	13	0.00580434	0.0184899	0.753582	-0.0304358	0.0420445
GCST90027528	PWY.1269..CMP.3.deoxy.D.manno.octulosonate.biosynthesis.I	insomnia	Inverse variance weighted	4	-0.000236348	0.032762	0.994244	-0.0644498	0.0639771
GCST90027528	PWY.1269..CMP.3.deoxy.D.manno.octulosonate.biosynthesis.I	insomnia	MR Egger	4	0.0350904	0.153307	0.840229	-0.265391	0.335572
GCST90027528	PWY.1269..CMP.3.deoxy.D.manno.octulosonate.biosynthesis.I	insomnia	Weighted median	4	0.000958219	0.0372235	0.979463	-0.0719999	0.0739163
GCST90027528	PWY.1269..CMP.3.deoxy.D.manno.octulosonate.biosynthesis.I	insomnia	Weighted mode	4	0.00434756	0.0495841	0.935655	-0.0928373	0.101532
GCST90027528	PWY.1269..CMP.3.deoxy.D.manno.octulosonate.biosynthesis.I	insomnia	Maximum likelihood	4	-0.000236705	0.0327797	0.994238	-0.064485	0.0640116
GCST90027529	PWY.2941..L.lysine.biosynthesis.II	insomnia	Inverse variance weighted	7	-0.0108651	0.0254777	0.669777	-0.0608014	0.0390713
GCST90027529	PWY.2941..L.lysine.biosynthesis.II	insomnia	MR Egger	7	-0.00476347	0.106342	0.966006	-0.213194	0.203667
GCST90027529	PWY.2941..L.lysine.biosynthesis.II	insomnia	Weighted median	7	-0.023243	0.0308053	0.450541	-0.0836215	0.0371354
GCST90027529	PWY.2941..L.lysine.biosynthesis.II	insomnia	Weighted mode	7	-0.0299618	0.0444986	0.525815	-0.117179	0.0572555
GCST90027529	PWY.2941..L.lysine.biosynthesis.II	insomnia	Maximum likelihood	7	-0.0110224	0.0256719	0.667665	-0.0613393	0.0392946
GCST90027530	PWY.2942..L.lysine.biosynthesis.III	insomnia	Inverse variance weighted	4	-0.0106601	0.0309056	0.730151	-0.0712352	0.0499149
GCST90027530	PWY.2942..L.lysine.biosynthesis.III	insomnia	MR Egger	4	0.106003	0.364716	0.79869	-0.60884	0.820846
GCST90027530	PWY.2942..L.lysine.biosynthesis.III	insomnia	Weighted median	4	-0.016896	0.0353204	0.632392	-0.086124	0.0523321
GCST90027530	PWY.2942..L.lysine.biosynthesis.III	insomnia	Weighted mode	4	-0.0179841	0.0467138	0.725922	-0.109543	0.073575
GCST90027530	PWY.2942..L.lysine.biosynthesis.III	insomnia	Maximum likelihood	4	-0.0106847	0.0309651	0.730053	-0.0713762	0.0500068
GCST90027531	PWY.3001..superpathway.of.L.isoleucine.biosynthesis.I	insomnia	Inverse variance weighted	4	-0.00635643	0.0331563	0.847968	-0.0713427	0.0586299
GCST90027531	PWY.3001..superpathway.of.L.isoleucine.biosynthesis.I	insomnia	MR Egger	4	0.0637374	0.144912	0.703021	-0.22029	0.347765
GCST90027531	PWY.3001..superpathway.of.L.isoleucine.biosynthesis.I	insomnia	Weighted median	4	-0.0141918	0.0386865	0.713738	-0.0900173	0.0616338
GCST90027531	PWY.3001..superpathway.of.L.isoleucine.biosynthesis.I	insomnia	Weighted mode	4	-0.0281882	0.0523366	0.627564	-0.130768	0.0743914
GCST90027531	PWY.3001..superpathway.of.L.isoleucine.biosynthesis.I	insomnia	Maximum likelihood	4	-0.00644585	0.0333786	0.84687	-0.071868	0.0589763
GCST90027532	PWY.3781..aerobic.respiration.I..cytochrome.c.	insomnia	Inverse variance weighted	2	0.0123936	0.0203692	0.542891	-0.0275301	0.0523173
GCST90027532	PWY.3781..aerobic.respiration.I..cytochrome.c.	insomnia	Maximum likelihood	2	0.0123934	0.0204381	0.544259	-0.0276653	0.052452
GCST90027533	PWY.4242..pantothenate.and.coenzyme.A.biosynthesis.III	insomnia	Inverse variance weighted	12	-0.00200941	0.018989	0.915726	-0.0392279	0.0352091
GCST90027533	PWY.4242..pantothenate.and.coenzyme.A.biosynthesis.III	insomnia	MR Egger	12	0.0164367	0.0847818	0.850158	-0.149736	0.182609
GCST90027533	PWY.4242..pantothenate.and.coenzyme.A.biosynthesis.III	insomnia	Weighted median	12	0.00303054	0.0252809	0.904583	-0.0465201	0.0525812
GCST90027533	PWY.4242..pantothenate.and.coenzyme.A.biosynthesis.III	insomnia	Weighted mode	12	0.00772839	0.0390301	0.846648	-0.0687707	0.0842275
GCST90027533	PWY.4242..pantothenate.and.coenzyme.A.biosynthesis.III	insomnia	Maximum likelihood	12	-0.00202721	0.0191773	0.915813	-0.0396147	0.0355603
GCST90027534	PWY.4984..urea.cycle	insomnia	Inverse variance weighted	6	0.0109752	0.028317	0.698323	-0.0445261	0.0664766
GCST90027534	PWY.4984..urea.cycle	insomnia	MR Egger	6	0.0878436	0.222192	0.712763	-0.347653	0.52334
GCST90027534	PWY.4984..urea.cycle	insomnia	Weighted median	6	0.009999	0.032718	0.7599	-0.0541283	0.0741263
GCST90027534	PWY.4984..urea.cycle	insomnia	Weighted mode	6	-0.00702734	0.0451509	0.882404	-0.0955231	0.0814684
GCST90027534	PWY.4984..urea.cycle	insomnia	Maximum likelihood	6	0.0110383	0.0284206	0.697728	-0.0446662	0.0667427
GCST90027535	PWY4FS.7..phosphatidylglycerol.biosynthesis.I..plastidic.	insomnia	Inverse variance weighted	9	0.0100325	0.0227978	0.659889	-0.0346511	0.0547162
GCST90027535	PWY4FS.7..phosphatidylglycerol.biosynthesis.I..plastidic.	insomnia	MR Egger	9	0.0198081	0.0835779	0.819442	-0.144004	0.183621
GCST90027535	PWY4FS.7..phosphatidylglycerol.biosynthesis.I..plastidic.	insomnia	Weighted median	9	-0.00295864	0.0287255	0.917965	-0.0592605	0.0533433
GCST90027535	PWY4FS.7..phosphatidylglycerol.biosynthesis.I..plastidic.	insomnia	Weighted mode	9	-0.00341281	0.0421285	0.937424	-0.0859846	0.079159
GCST90027535	PWY4FS.7..phosphatidylglycerol.biosynthesis.I..plastidic.	insomnia	Maximum likelihood	9	0.0102353	0.0229407	0.65548	-0.0347285	0.055199
GCST90027536	PWY.5005..biotin.biosynthesis.II	insomnia	Inverse variance weighted	8	-0.00151119	0.0192778	0.937517	-0.0392956	0.0362732
GCST90027536	PWY.5005..biotin.biosynthesis.II	insomnia	MR Egger	8	0.0405631	0.0886987	0.663537	-0.133286	0.214413
GCST90027536	PWY.5005..biotin.biosynthesis.II	insomnia	Weighted median	8	-0.00319956	0.0231386	0.890021	-0.0485513	0.0421522
GCST90027536	PWY.5005..biotin.biosynthesis.II	insomnia	Weighted mode	8	-0.00174921	0.0338505	0.960232	-0.0680962	0.0645978
GCST90027536	PWY.5005..biotin.biosynthesis.II	insomnia	Maximum likelihood	8	-0.00154831	0.0193433	0.936202	-0.0394612	0.0363646
GCST90027537	PWY.5022..4.aminobutanoate.degradation.V	insomnia	Inverse variance weighted	4	0.0232024	0.0322415	0.471743	-0.0399908	0.0863957
GCST90027537	PWY.5022..4.aminobutanoate.degradation.V	insomnia	MR Egger	4	0.0246109	0.127582	0.864849	-0.22545	0.274672
GCST90027537	PWY.5022..4.aminobutanoate.degradation.V	insomnia	Weighted median	4	0.0289235	0.0372997	0.438083	-0.044184	0.102031
GCST90027537	PWY.5022..4.aminobutanoate.degradation.V	insomnia	Weighted mode	4	0.0335623	0.0463886	0.521681	-0.0573593	0.124484
GCST90027537	PWY.5022..4.aminobutanoate.degradation.V	insomnia	Maximum likelihood	4	0.023352	0.0324514	0.471771	-0.0402527	0.0869568
GCST90027538	PWY.5088..L.glutamate.degradation.VIII..to.propanoate.	insomnia	Inverse variance weighted	8	-0.00142455	0.0111187	0.898052	-0.0232171	0.020368
GCST90027538	PWY.5088..L.glutamate.degradation.VIII..to.propanoate.	insomnia	MR Egger	8	-0.0161898	0.0370516	0.677433	-0.0888109	0.0564314
GCST90027538	PWY.5088..L.glutamate.degradation.VIII..to.propanoate.	insomnia	Weighted median	8	-0.000150336	0.0134481	0.991081	-0.0265086	0.0262079
GCST90027538	PWY.5088..L.glutamate.degradation.VIII..to.propanoate.	insomnia	Weighted mode	8	0.00285542	0.0186105	0.882388	-0.0336212	0.039332
GCST90027538	PWY.5088..L.glutamate.degradation.VIII..to.propanoate.	insomnia	Maximum likelihood	8	-0.00143245	0.0111518	0.897792	-0.0232899	0.020425
GCST90027539	PWY.5097..L.lysine.biosynthesis.VI	insomnia	Inverse variance weighted	12	-0.00737966	0.0192998	0.702187	-0.0452073	0.030448
GCST90027539	PWY.5097..L.lysine.biosynthesis.VI	insomnia	MR Egger	12	-0.0169375	0.101911	0.871313	-0.216684	0.182809
GCST90027539	PWY.5097..L.lysine.biosynthesis.VI	insomnia	Weighted median	12	-0.00964045	0.0240838	0.688944	-0.0568446	0.0375637
GCST90027539	PWY.5097..L.lysine.biosynthesis.VI	insomnia	Weighted mode	12	-0.013574	0.0385954	0.731708	-0.0892209	0.0620729
GCST90027539	PWY.5097..L.lysine.biosynthesis.VI	insomnia	Maximum likelihood	12	-0.00744811	0.0193662	0.700539	-0.0454059	0.0305096
GCST90027540	PWY.5100..pyruvate.fermentation.to.acetate.and.lactate.II	insomnia	Inverse variance weighted	10	-0.00354716	0.0214525	0.868669	-0.045594	0.0384997
GCST90027540	PWY.5100..pyruvate.fermentation.to.acetate.and.lactate.II	insomnia	MR Egger	10	0.0434172	0.0917985	0.648876	-0.136508	0.223342
GCST90027540	PWY.5100..pyruvate.fermentation.to.acetate.and.lactate.II	insomnia	Weighted median	10	-0.00689836	0.0274114	0.801304	-0.0606247	0.046828
GCST90027540	PWY.5100..pyruvate.fermentation.to.acetate.and.lactate.II	insomnia	Weighted mode	10	-0.0267002	0.045636	0.572875	-0.116147	0.0627463
GCST90027540	PWY.5100..pyruvate.fermentation.to.acetate.and.lactate.II	insomnia	Maximum likelihood	10	-0.00360918	0.0216614	0.867671	-0.0460655	0.0388472
GCST90027541	PWY.5101..L.isoleucine.biosynthesis.II	insomnia	Inverse variance weighted	10	-0.00141125	0.0207264	0.945714	-0.0420351	0.0392126
GCST90027541	PWY.5101..L.isoleucine.biosynthesis.II	insomnia	MR Egger	10	0.0127239	0.0860072	0.886051	-0.15585	0.181298
GCST90027541	PWY.5101..L.isoleucine.biosynthesis.II	insomnia	Weighted median	10	0.00558296	0.0263969	0.832497	-0.046155	0.0573209
GCST90027541	PWY.5101..L.isoleucine.biosynthesis.II	insomnia	Weighted mode	10	0.0146478	0.0429115	0.740675	-0.0694587	0.0987543
GCST90027541	PWY.5101..L.isoleucine.biosynthesis.II	insomnia	Maximum likelihood	10	-0.0014429	0.0209137	0.944995	-0.0424337	0.0395479
GCST90027542	PWY.5104..L.isoleucine.biosynthesis.IV	insomnia	Inverse variance weighted	8	0.00232383	0.0236771	0.921816	-0.0440833	0.0487309
GCST90027542	PWY.5104..L.isoleucine.biosynthesis.IV	insomnia	MR Egger	8	0.0708247	0.10493	0.524837	-0.134838	0.276488
GCST90027542	PWY.5104..L.isoleucine.biosynthesis.IV	insomnia	Weighted median	8	-0.00414028	0.0290936	0.886836	-0.0611638	0.0528833
GCST90027542	PWY.5104..L.isoleucine.biosynthesis.IV	insomnia	Weighted mode	8	-0.00679937	0.0415311	0.87458	-0.0882004	0.0746017
GCST90027542	PWY.5104..L.isoleucine.biosynthesis.IV	insomnia	Maximum likelihood	8	0.00233174	0.0237479	0.921784	-0.0442142	0.0488777
GCST90027543	PWY.5121..superpathway.of.geranylgeranyl.diphosphate.biosynthesis.II..via.MEP.	insomnia	Inverse variance weighted	8	-0.009216	0.0209822	0.660496	-0.0503412	0.0319092
GCST90027543	PWY.5121..superpathway.of.geranylgeranyl.diphosphate.biosynthesis.II..via.MEP.	insomnia	MR Egger	8	0.046986	0.083994	0.596139	-0.117642	0.211614
GCST90027543	PWY.5121..superpathway.of.geranylgeranyl.diphosphate.biosynthesis.II..via.MEP.	insomnia	Weighted median	8	-0.0068727	0.0263393	0.794147	-0.0584978	0.0447524
GCST90027543	PWY.5121..superpathway.of.geranylgeranyl.diphosphate.biosynthesis.II..via.MEP.	insomnia	Weighted mode	8	-0.00576798	0.0354595	0.875379	-0.0752686	0.0637326
GCST90027543	PWY.5121..superpathway.of.geranylgeranyl.diphosphate.biosynthesis.II..via.MEP.	insomnia	Maximum likelihood	8	-0.00935471	0.0211448	0.658191	-0.0507985	0.0320891
GCST90027544	PWY.5173..superpathway.of.acetyl.CoA.biosynthesis	insomnia	Inverse variance weighted	11	0.0098407	0.0150687	0.513721	-0.019694	0.0393754
GCST90027544	PWY.5173..superpathway.of.acetyl.CoA.biosynthesis	insomnia	MR Egger	11	-0.033246	0.0597391	0.591422	-0.150335	0.0838426
GCST90027544	PWY.5173..superpathway.of.acetyl.CoA.biosynthesis	insomnia	Weighted median	11	0.00782148	0.0185445	0.673194	-0.0285258	0.0441687
GCST90027544	PWY.5173..superpathway.of.acetyl.CoA.biosynthesis	insomnia	Weighted mode	11	0.00300878	0.0302782	0.922807	-0.0563364	0.062354
GCST90027544	PWY.5173..superpathway.of.acetyl.CoA.biosynthesis	insomnia	Maximum likelihood	11	0.00993539	0.0152024	0.513407	-0.0198613	0.0397321
GCST90027545	PWY.5177..glutaryl.CoA.degradation	insomnia	Inverse variance weighted	7	-0.00142922	0.0260332	0.956218	-0.0524543	0.0495958
GCST90027545	PWY.5177..glutaryl.CoA.degradation	insomnia	MR Egger	7	-0.0682744	0.215813	0.764511	-0.491268	0.354719
GCST90027545	PWY.5177..glutaryl.CoA.degradation	insomnia	Weighted median	7	-0.0157962	0.033858	0.640826	-0.0821579	0.0505655
GCST90027545	PWY.5177..glutaryl.CoA.degradation	insomnia	Weighted mode	7	-0.0145358	0.0478622	0.771612	-0.108346	0.0792742
GCST90027545	PWY.5177..glutaryl.CoA.degradation	insomnia	Maximum likelihood	7	-0.0014692	0.0263059	0.955461	-0.0530287	0.0500903
GCST90027546	PWY.5188..tetrapyrrole.biosynthesis.I..from.glutamate.	insomnia	Inverse variance weighted	9	8.07716e-05	0.0216459	0.997023	-0.0423452	0.0425068
GCST90027546	PWY.5188..tetrapyrrole.biosynthesis.I..from.glutamate.	insomnia	MR Egger	9	-0.00978584	0.097142	0.922583	-0.200184	0.180612
GCST90027546	PWY.5188..tetrapyrrole.biosynthesis.I..from.glutamate.	insomnia	Weighted median	9	-0.00570718	0.0269887	0.832524	-0.0586051	0.0471907
GCST90027546	PWY.5188..tetrapyrrole.biosynthesis.I..from.glutamate.	insomnia	Weighted mode	9	-0.0044706	0.0394929	0.912661	-0.0818768	0.0729356
GCST90027546	PWY.5188..tetrapyrrole.biosynthesis.I..from.glutamate.	insomnia	Maximum likelihood	9	8.06454e-05	0.0217058	0.997036	-0.0424628	0.0426241
GCST90027547	PWY.5189..tetrapyrrole.biosynthesis.II..from.glycine.	insomnia	Inverse variance weighted	9	-0.0159523	0.0183239	0.383987	-0.051867	0.0199625
GCST90027547	PWY.5189..tetrapyrrole.biosynthesis.II..from.glycine.	insomnia	MR Egger	9	-0.0620521	0.0738494	0.42853	-0.206797	0.0826927
GCST90027547	PWY.5189..tetrapyrrole.biosynthesis.II..from.glycine.	insomnia	Weighted median	9	-0.0163051	0.0226337	0.471284	-0.0606671	0.0280569
GCST90027547	PWY.5189..tetrapyrrole.biosynthesis.II..from.glycine.	insomnia	Weighted mode	9	-0.02151	0.0333892	0.537462	-0.0869528	0.0439329
GCST90027547	PWY.5189..tetrapyrrole.biosynthesis.II..from.glycine.	insomnia	Maximum likelihood	9	-0.0158097	0.0184168	0.390649	-0.0519067	0.0202872
GCST90027548	PWY.5345..superpathway.of.L.methionine.biosynthesis..by.sulfhydrylation.	insomnia	Inverse variance weighted	8	0.000618132	0.0232203	0.978763	-0.0448937	0.0461299
GCST90027548	PWY.5345..superpathway.of.L.methionine.biosynthesis..by.sulfhydrylation.	insomnia	MR Egger	8	0.0153755	0.0953928	0.877241	-0.171594	0.202345
GCST90027548	PWY.5345..superpathway.of.L.methionine.biosynthesis..by.sulfhydrylation.	insomnia	Weighted median	8	0.0147018	0.0289082	0.611054	-0.0419582	0.0713619
GCST90027548	PWY.5345..superpathway.of.L.methionine.biosynthesis..by.sulfhydrylation.	insomnia	Weighted mode	8	0.0194443	0.0422325	0.659181	-0.0633313	0.10222
GCST90027548	PWY.5345..superpathway.of.L.methionine.biosynthesis..by.sulfhydrylation.	insomnia	Maximum likelihood	8	0.000629702	0.023348	0.978483	-0.0451323	0.0463917
GCST90027549	PWY.5384..sucrose.degradation.IV..sucrose.phosphorylase.	insomnia	Inverse variance weighted	8	-0.00887445	0.018959	0.639722	-0.046034	0.0282851
GCST90027549	PWY.5384..sucrose.degradation.IV..sucrose.phosphorylase.	insomnia	MR Egger	8	-0.0327848	0.0659252	0.636671	-0.161998	0.0964286
GCST90027549	PWY.5384..sucrose.degradation.IV..sucrose.phosphorylase.	insomnia	Weighted median	8	-0.0063673	0.0245399	0.795275	-0.0544655	0.0417309
GCST90027549	PWY.5384..sucrose.degradation.IV..sucrose.phosphorylase.	insomnia	Weighted mode	8	-0.00519927	0.0331593	0.879831	-0.0701914	0.0597929
GCST90027549	PWY.5384..sucrose.degradation.IV..sucrose.phosphorylase.	insomnia	Maximum likelihood	8	-0.0089517	0.019019	0.637876	-0.046229	0.0283256
GCST90027550	PWY.5505..L.glutamate.and.L.glutamine.biosynthesis	insomnia	Inverse variance weighted	16	-0.000104052	0.0136701	0.993927	-0.0268974	0.0266892
GCST90027550	PWY.5505..L.glutamate.and.L.glutamine.biosynthesis	insomnia	MR Egger	16	-0.0203656	0.0481925	0.679014	-0.114823	0.0740917
GCST90027550	PWY.5505..L.glutamate.and.L.glutamine.biosynthesis	insomnia	Weighted median	16	-0.00436594	0.0170596	0.79801	-0.0378027	0.0290708
GCST90027550	PWY.5505..L.glutamate.and.L.glutamine.biosynthesis	insomnia	Weighted mode	16	-0.0107195	0.0285172	0.712257	-0.0666133	0.0451743
GCST90027550	PWY.5505..L.glutamate.and.L.glutamine.biosynthesis	insomnia	Maximum likelihood	16	-0.000105098	0.0137262	0.993891	-0.0270085	0.0267983
GCST90027551	PWY.5656..mannosylglycerate.biosynthesis.I	insomnia	Inverse variance weighted	8	0.00267219	0.0102037	0.793411	-0.0173271	0.0226715
GCST90027551	PWY.5656..mannosylglycerate.biosynthesis.I	insomnia	MR Egger	8	-0.0288779	0.0354199	0.446048	-0.0983009	0.040545
GCST90027551	PWY.5656..mannosylglycerate.biosynthesis.I	insomnia	Weighted median	8	0.00882112	0.0129129	0.494528	-0.0164882	0.0341304
GCST90027551	PWY.5656..mannosylglycerate.biosynthesis.I	insomnia	Weighted mode	8	0.0132013	0.0187554	0.504249	-0.0235592	0.0499618
GCST90027551	PWY.5656..mannosylglycerate.biosynthesis.I	insomnia	Maximum likelihood	8	0.00269724	0.0102708	0.792849	-0.0174335	0.022828
GCST90027552	PWY.5659..GDP.mannose.biosynthesis	insomnia	Inverse variance weighted	5	-0.00447512	0.0291632	0.878043	-0.0616349	0.0526847
GCST90027552	PWY.5659..GDP.mannose.biosynthesis	insomnia	MR Egger	5	0.0309373	0.108493	0.794078	-0.181708	0.243583
GCST90027552	PWY.5659..GDP.mannose.biosynthesis	insomnia	Weighted median	5	0.00408217	0.0334735	0.902937	-0.0615259	0.0696902
GCST90027552	PWY.5659..GDP.mannose.biosynthesis	insomnia	Weighted mode	5	0.00379938	0.0439636	0.935285	-0.0823693	0.089968
GCST90027552	PWY.5659..GDP.mannose.biosynthesis	insomnia	Maximum likelihood	5	-0.00449821	0.0292364	0.877723	-0.0618016	0.0528052
GCST90027553	PWY.5667..CDP.diacylglycerol.biosynthesis.I	insomnia	Inverse variance weighted	13	-0.00129241	0.018622	0.944669	-0.0377916	0.0352068
GCST90027553	PWY.5667..CDP.diacylglycerol.biosynthesis.I	insomnia	MR Egger	13	-0.0282316	0.0696943	0.693187	-0.164832	0.108369
GCST90027553	PWY.5667..CDP.diacylglycerol.biosynthesis.I	insomnia	Weighted median	13	-0.00601401	0.0248287	0.80861	-0.0546783	0.0426503
GCST90027553	PWY.5667..CDP.diacylglycerol.biosynthesis.I	insomnia	Weighted mode	13	-0.0155132	0.0399192	0.704368	-0.0937549	0.0627285
GCST90027553	PWY.5667..CDP.diacylglycerol.biosynthesis.I	insomnia	Maximum likelihood	13	-0.00130086	0.018764	0.944729	-0.0380783	0.0354765
GCST90027554	PWY.5676..acetyl.CoA.fermentation.to.butanoate.II	insomnia	Inverse variance weighted	6	-0.0116021	0.0270816	0.66835	-0.064682	0.0414778
GCST90027554	PWY.5676..acetyl.CoA.fermentation.to.butanoate.II	insomnia	MR Egger	6	-0.0945861	0.101618	0.404645	-0.293757	0.104584
GCST90027554	PWY.5676..acetyl.CoA.fermentation.to.butanoate.II	insomnia	Weighted median	6	-0.00546138	0.0322465	0.865511	-0.0686645	0.0577418
GCST90027554	PWY.5676..acetyl.CoA.fermentation.to.butanoate.II	insomnia	Weighted mode	6	0.013708	0.0457689	0.776605	-0.075999	0.103415
GCST90027554	PWY.5676..acetyl.CoA.fermentation.to.butanoate.II	insomnia	Maximum likelihood	6	-0.0117153	0.0272312	0.667037	-0.0650884	0.0416577
GCST90027555	PWY.5686..UMP.biosynthesis	insomnia	Inverse variance weighted	2	-0.0203632	0.0463025	0.660092	-0.111116	0.0703896
GCST90027555	PWY.5686..UMP.biosynthesis	insomnia	Maximum likelihood	2	-0.0204048	0.0464636	0.660548	-0.111473	0.0706638
GCST90027556	PWY.5695..urate.biosynthesis.inosine.5..phosphate.degradation	insomnia	Inverse variance weighted	9	0.00631883	0.0226603	0.78036	-0.0380953	0.050733
GCST90027556	PWY.5695..urate.biosynthesis.inosine.5..phosphate.degradation	insomnia	MR Egger	9	-0.0316657	0.118633	0.797222	-0.264186	0.200855
GCST90027556	PWY.5695..urate.biosynthesis.inosine.5..phosphate.degradation	insomnia	Weighted median	9	0.00783872	0.0283539	0.782195	-0.047735	0.0634124
GCST90027556	PWY.5695..urate.biosynthesis.inosine.5..phosphate.degradation	insomnia	Weighted mode	9	0.00757781	0.0428097	0.863899	-0.0763292	0.0914849
GCST90027556	PWY.5695..urate.biosynthesis.inosine.5..phosphate.degradation	insomnia	Maximum likelihood	9	0.00633876	0.0227131	0.780184	-0.0381789	0.0508565
GCST90027557	PWY.5705..allantoin.degradation.to.glyoxylate.III	insomnia	Inverse variance weighted	8	0.00815383	0.0121446	0.501969	-0.0156496	0.0319573
GCST90027557	PWY.5705..allantoin.degradation.to.glyoxylate.III	insomnia	MR Egger	8	0.0514314	0.0864711	0.57372	-0.118052	0.220915
GCST90027557	PWY.5705..allantoin.degradation.to.glyoxylate.III	insomnia	Weighted median	8	0.013904	0.0144547	0.336101	-0.0144273	0.0422353
GCST90027557	PWY.5705..allantoin.degradation.to.glyoxylate.III	insomnia	Weighted mode	8	0.0162537	0.0214024	0.472388	-0.025695	0.0582025
GCST90027557	PWY.5705..allantoin.degradation.to.glyoxylate.III	insomnia	Maximum likelihood	8	0.00823502	0.0122249	0.500549	-0.0157258	0.0321959
GCST90027558	PWY.5791..1.4.dihydroxy.2.naphthoate.biosynthesis.II..plants.	insomnia	Inverse variance weighted	12	-0.00021101	0.0141368	0.988091	-0.0279192	0.0274972
GCST90027558	PWY.5791..1.4.dihydroxy.2.naphthoate.biosynthesis.II..plants.	insomnia	MR Egger	12	0.0185699	0.0659308	0.783949	-0.110654	0.147794
GCST90027558	PWY.5791..1.4.dihydroxy.2.naphthoate.biosynthesis.II..plants.	insomnia	Weighted median	12	-0.00365482	0.0177567	0.836926	-0.0384579	0.0311483
GCST90027558	PWY.5791..1.4.dihydroxy.2.naphthoate.biosynthesis.II..plants.	insomnia	Weighted mode	12	-0.0115982	0.0297355	0.703949	-0.0698798	0.0466834
GCST90027558	PWY.5791..1.4.dihydroxy.2.naphthoate.biosynthesis.II..plants.	insomnia	Maximum likelihood	12	-0.000215702	0.0142741	0.987943	-0.028193	0.0277616
GCST90027559	PWY.5838..superpathway.of.menaquinol.8.biosynthesis.I	insomnia	Inverse variance weighted	4	0.00556699	0.0184178	0.762453	-0.030532	0.041666
GCST90027559	PWY.5838..superpathway.of.menaquinol.8.biosynthesis.I	insomnia	MR Egger	4	0.0167182	0.0908233	0.870928	-0.161295	0.194732
GCST90027559	PWY.5838..superpathway.of.menaquinol.8.biosynthesis.I	insomnia	Weighted median	4	0.0055559	0.0211211	0.792512	-0.0358415	0.0469533
GCST90027559	PWY.5838..superpathway.of.menaquinol.8.biosynthesis.I	insomnia	Weighted mode	4	0.00546863	0.0264089	0.84921	-0.0462929	0.0572301
GCST90027559	PWY.5838..superpathway.of.menaquinol.8.biosynthesis.I	insomnia	Maximum likelihood	4	0.00557	0.0184326	0.762513	-0.0305579	0.0416979
GCST90027560	PWY.5850..superpathway.of.menaquinol.6.biosynthesis.I	insomnia	Inverse variance weighted	8	0.00500158	0.0115369	0.66463	-0.0176107	0.0276139
GCST90027560	PWY.5850..superpathway.of.menaquinol.6.biosynthesis.I	insomnia	MR Egger	8	-0.00128707	0.0490013	0.979897	-0.0973295	0.0947554
GCST90027560	PWY.5850..superpathway.of.menaquinol.6.biosynthesis.I	insomnia	Weighted median	8	-0.00547901	0.0143726	0.703046	-0.0336493	0.0226913
GCST90027560	PWY.5850..superpathway.of.menaquinol.6.biosynthesis.I	insomnia	Weighted mode	8	-0.00936101	0.0208142	0.666493	-0.0501568	0.0314348
GCST90027560	PWY.5850..superpathway.of.menaquinol.6.biosynthesis.I	insomnia	Maximum likelihood	8	0.00514015	0.011676	0.65977	-0.0177449	0.0280252
GCST90027561	PWY.5913..TCA.cycle.VI..obligate.autotrophs.	insomnia	Inverse variance weighted	5	0.0155551	0.0232567	0.503596	-0.0300281	0.0611382
GCST90027561	PWY.5913..TCA.cycle.VI..obligate.autotrophs.	insomnia	MR Egger	5	0.0170882	0.176252	0.928878	-0.328365	0.362541
GCST90027561	PWY.5913..TCA.cycle.VI..obligate.autotrophs.	insomnia	Weighted median	5	0.0241648	0.028907	0.403184	-0.032493	0.0808225
GCST90027561	PWY.5913..TCA.cycle.VI..obligate.autotrophs.	insomnia	Weighted mode	5	0.0245434	0.0403962	0.576277	-0.0546331	0.10372
GCST90027561	PWY.5913..TCA.cycle.VI..obligate.autotrophs.	insomnia	Maximum likelihood	5	0.0157102	0.0234202	0.502348	-0.0301933	0.0616138
GCST90027562	PWY.5918..superpathay.of.heme.biosynthesis.from.glutamate	insomnia	Inverse variance weighted	8	-0.0110186	0.0181255	0.543249	-0.0465446	0.0245074
GCST90027562	PWY.5918..superpathay.of.heme.biosynthesis.from.glutamate	insomnia	MR Egger	8	-0.0701755	0.0785814	0.406232	-0.224195	0.083844
GCST90027562	PWY.5918..superpathay.of.heme.biosynthesis.from.glutamate	insomnia	Weighted median	8	-0.0178014	0.0230319	0.439581	-0.0629438	0.0273411
GCST90027562	PWY.5918..superpathay.of.heme.biosynthesis.from.glutamate	insomnia	Weighted mode	8	-0.0263283	0.0328202	0.448811	-0.090656	0.0379993
GCST90027562	PWY.5918..superpathay.of.heme.biosynthesis.from.glutamate	insomnia	Maximum likelihood	8	-0.0109524	0.0182842	0.549166	-0.0467895	0.0248847
GCST90027563	PWY.5920..superpathway.of.heme.biosynthesis.from.glycine	insomnia	Inverse variance weighted	7	0.0072532	0.0122101	0.55249	-0.0166786	0.031185
GCST90027563	PWY.5920..superpathway.of.heme.biosynthesis.from.glycine	insomnia	MR Egger	7	0.027363	0.0369668	0.492446	-0.0450918	0.0998179
GCST90027563	PWY.5920..superpathway.of.heme.biosynthesis.from.glycine	insomnia	Weighted median	7	0.0115759	0.0145422	0.42602	-0.0169268	0.0400785
GCST90027563	PWY.5920..superpathway.of.heme.biosynthesis.from.glycine	insomnia	Weighted mode	7	0.0125314	0.020378	0.561171	-0.0274094	0.0524722
GCST90027563	PWY.5920..superpathway.of.heme.biosynthesis.from.glycine	insomnia	Maximum likelihood	7	0.00728204	0.0122506	0.55223	-0.0167292	0.0312933
GCST90027564	PWY.5941..glycogen.degradation.II..eukaryotic.	insomnia	Inverse variance weighted	5	-0.00320492	0.0261017	0.902277	-0.0543643	0.0479545
GCST90027564	PWY.5941..glycogen.degradation.II..eukaryotic.	insomnia	MR Egger	5	-0.0304925	0.113841	0.806174	-0.253621	0.192636
GCST90027564	PWY.5941..glycogen.degradation.II..eukaryotic.	insomnia	Weighted median	5	-0.00836886	0.0314764	0.790333	-0.0700625	0.0533248
GCST90027564	PWY.5941..glycogen.degradation.II..eukaryotic.	insomnia	Weighted mode	5	-0.0134698	0.0391143	0.747911	-0.0901337	0.0631941
GCST90027564	PWY.5941..glycogen.degradation.II..eukaryotic.	insomnia	Maximum likelihood	5	-0.00321812	0.0261629	0.902105	-0.0544974	0.0480612
GCST90027565	PWY.5971..palmitate.biosynthesis.II..bacteria.and.plants.	insomnia	Inverse variance weighted	13	0.00391647	0.0169307	0.817063	-0.0292676	0.0371006
GCST90027565	PWY.5971..palmitate.biosynthesis.II..bacteria.and.plants.	insomnia	MR Egger	13	0.0321682	0.0705204	0.657153	-0.106052	0.170388
GCST90027565	PWY.5971..palmitate.biosynthesis.II..bacteria.and.plants.	insomnia	Weighted median	13	0.00358877	0.021078	0.864804	-0.0377241	0.0449017
GCST90027565	PWY.5971..palmitate.biosynthesis.II..bacteria.and.plants.	insomnia	Weighted mode	13	0.00184652	0.0365233	0.96051	-0.0697392	0.0734323
GCST90027565	PWY.5971..palmitate.biosynthesis.II..bacteria.and.plants.	insomnia	Maximum likelihood	13	0.00392554	0.0169915	0.817292	-0.0293778	0.0372289
GCST90027566	PWY.5973..cis.vaccenate.biosynthesis	insomnia	Inverse variance weighted	12	-0.00489124	0.0193882	0.800826	-0.0428922	0.0331097
GCST90027566	PWY.5973..cis.vaccenate.biosynthesis	insomnia	MR Egger	12	-0.0549291	0.0698908	0.450131	-0.191915	0.0820569
GCST90027566	PWY.5973..cis.vaccenate.biosynthesis	insomnia	Weighted median	12	-0.00812642	0.0252677	0.747746	-0.0576511	0.0413982
GCST90027566	PWY.5973..cis.vaccenate.biosynthesis	insomnia	Weighted mode	12	-0.00999713	0.0399691	0.807103	-0.0883366	0.0683423
GCST90027566	PWY.5973..cis.vaccenate.biosynthesis	insomnia	Maximum likelihood	12	-0.00493197	0.0194705	0.800033	-0.0430942	0.0332303
GCST90027567	PWY.5989..stearate.biosynthesis.II..bacteria.and.plants.	insomnia	Inverse variance weighted	6	0.011059	0.0266075	0.677677	-0.0410917	0.0632098
GCST90027567	PWY.5989..stearate.biosynthesis.II..bacteria.and.plants.	insomnia	MR Egger	6	-0.0608262	0.0961591	0.561378	-0.249298	0.127646
GCST90027567	PWY.5989..stearate.biosynthesis.II..bacteria.and.plants.	insomnia	Weighted median	6	0.0124534	0.031883	0.696095	-0.0500373	0.0749442
GCST90027567	PWY.5989..stearate.biosynthesis.II..bacteria.and.plants.	insomnia	Weighted mode	6	0.0208671	0.0443332	0.657682	-0.0660261	0.10776
GCST90027567	PWY.5989..stearate.biosynthesis.II..bacteria.and.plants.	insomnia	Maximum likelihood	6	0.0111435	0.0267246	0.676696	-0.0412367	0.0635237
GCST90027568	PWY.6121..5.aminoimidazole.ribonucleotide.biosynthesis.I	insomnia	Inverse variance weighted	6	0.00964004	0.0282915	0.7333	-0.0458113	0.0650914
GCST90027568	PWY.6121..5.aminoimidazole.ribonucleotide.biosynthesis.I	insomnia	MR Egger	6	0.0479785	0.138959	0.747283	-0.224382	0.320339
GCST90027568	PWY.6121..5.aminoimidazole.ribonucleotide.biosynthesis.I	insomnia	Weighted median	6	0.00468219	0.0328091	0.886519	-0.0596237	0.068988
GCST90027568	PWY.6121..5.aminoimidazole.ribonucleotide.biosynthesis.I	insomnia	Weighted mode	6	0.00438735	0.0453416	0.926674	-0.0844821	0.0932568
GCST90027568	PWY.6121..5.aminoimidazole.ribonucleotide.biosynthesis.I	insomnia	Maximum likelihood	6	0.00967577	0.0283694	0.733056	-0.0459282	0.0652798
GCST90027569	PWY.6123..inosine.5..phosphate.biosynthesis.I	insomnia	Inverse variance weighted	5	0.0379012	0.0309925	0.221362	-0.0228441	0.0986464
GCST90027569	PWY.6123..inosine.5..phosphate.biosynthesis.I	insomnia	MR Egger	5	0.0122736	0.134824	0.933204	-0.251982	0.276529
GCST90027569	PWY.6123..inosine.5..phosphate.biosynthesis.I	insomnia	Weighted median	5	0.0307579	0.0383729	0.422812	-0.044453	0.105969
GCST90027569	PWY.6123..inosine.5..phosphate.biosynthesis.I	insomnia	Weighted mode	5	0.0270129	0.0468104	0.594815	-0.0647356	0.118761
GCST90027569	PWY.6123..inosine.5..phosphate.biosynthesis.I	insomnia	Maximum likelihood	5	0.0381873	0.0313381	0.223013	-0.0232355	0.09961
GCST90027570	PWY.6125..superpathway.of.guanosine.nucleotides.de.novo.biosynthesis.II	insomnia	Inverse variance weighted	8	-0.0119705	0.0244128	0.623896	-0.0598196	0.0358786
GCST90027570	PWY.6125..superpathway.of.guanosine.nucleotides.de.novo.biosynthesis.II	insomnia	MR Egger	8	0.04421	0.105328	0.689291	-0.162232	0.250652
GCST90027570	PWY.6125..superpathway.of.guanosine.nucleotides.de.novo.biosynthesis.II	insomnia	Weighted median	8	-0.0134061	0.0290988	0.645006	-0.0704397	0.0436275
GCST90027570	PWY.6125..superpathway.of.guanosine.nucleotides.de.novo.biosynthesis.II	insomnia	Weighted mode	8	-0.0276414	0.0436576	0.546762	-0.11321	0.0579275
GCST90027570	PWY.6125..superpathway.of.guanosine.nucleotides.de.novo.biosynthesis.II	insomnia	Maximum likelihood	8	-0.0120828	0.024536	0.6224	-0.0601733	0.0360077
GCST90027571	PWY.6147..6.hydroxymethyl.dihydropterin.diphosphate.biosynthesis.I	insomnia	Inverse variance weighted	13	0.000376724	0.0182776	0.983556	-0.0354474	0.0362008
GCST90027571	PWY.6147..6.hydroxymethyl.dihydropterin.diphosphate.biosynthesis.I	insomnia	MR Egger	13	-0.035965	0.088778	0.693162	-0.20997	0.13804
[truncated: 13,299 more rows]

## Sheet: Table S4
Full result of MR estimates for the association of sleeprelated traits on microbial taxa and pathways
[truncated: 7,413 more rows]

[truncated: 2 more sheets: Table S5, Table S6]
